# Supplementary material for: Clinical, humanistic and economic outcomes, including experiencing of patient safety events, associated with admitting patients to single rooms compared with shared accommodation for acute hospital admissions: a systematic review and narrative synthesis
Source: PubMed Central journal article supplement — BMJ Open. 2023 May 5;13(5):e068932. doi: 10.1136/bmjopen-2022-068932 (PMC10163491; doi:10.1136/bmjopen-2022-068932), 2023-05-05
Supplement: bmjopen-2022-068932.draft_revisions.pdf [file bmjopen-2022-068932.draft_revisions.pdf]

# BMJ Open

BMJ Open is committed to open peer review. As part of this commitment we make the peer review history of every article we publish publicly available.

When an article is published we post the peer reviewers' comments and the authors' responses online. We also post the versions of the paper that were used during peer review. These are the versions that the peer review comments apply to.

The versions of the paper that follow are the versions that were submitted during the peer review process. They are not the versions of record or the final published versions. They should not be cited or distributed as the published version of this manuscript.

BMJ Open is an open access journal and the full, final, typeset and author-corrected version of record of the manuscript is available on our site with no access controls, subscription charges or pay-per-view fees (<http://bmjopen.bmj.com>).

If you have any questions on BMJ Open's open peer review process please email [info.bmjopen@bmj.com](mailto:info.bmjopen@bmj.com)

# BMJ Open

**The clinical, humanistic, and economic outcomes, including experiencing of patient safety events, associated with admitting patients to single rooms compared with shared accommodation for acute hospital admissions. A narrative synthesis systematic literature review.**

|                               |                                                                                                                                                                                                                                                                                                                                                                                                                                                                                                                                    |
|-------------------------------|------------------------------------------------------------------------------------------------------------------------------------------------------------------------------------------------------------------------------------------------------------------------------------------------------------------------------------------------------------------------------------------------------------------------------------------------------------------------------------------------------------------------------------|
| Journal:                      | <i>BMJ Open</i>                                                                                                                                                                                                                                                                                                                                                                                                                                                                                                                    |
| Manuscript ID                 | bmjopen-2022-068932                                                                                                                                                                                                                                                                                                                                                                                                                                                                                                                |
| Article Type:                 | Original research                                                                                                                                                                                                                                                                                                                                                                                                                                                                                                                  |
| Date Submitted by the Author: | 20-Oct-2022                                                                                                                                                                                                                                                                                                                                                                                                                                                                                                                        |
| Complete List of Authors:     | Bertuzzi, Andrea; Crystallise Ltd<br>Martin, Alison; Crystallise Ltd<br>Clarke, Nicola; Crystallise Ltd<br>Springate, Cassandra; Crystallise Ltd<br>Ashton, Rachel; Ashton Editorial Consulting; NHS England and NHS Improvement Midlands The Health Economics Unit,<br>Smith, Wayne; NHS England and NHS Improvement Midlands The Health Economics Unit<br>Orlowski, Andi; Health Economics Unit; Imperial College London, Department of Primary Care and Public Health<br>McPherson, Duncan; NHS England, New Hospital Programme |
| Keywords:                     | Economics < TROPICAL MEDICINE, Health policy < HEALTH SERVICES ADMINISTRATION & MANAGEMENT, HEALTH ECONOMICS, Organisation of health services < HEALTH SERVICES ADMINISTRATION & MANAGEMENT, Quality in health care < HEALTH SERVICES ADMINISTRATION & MANAGEMENT                                                                                                                                                                                                                                                                  |
|                               |                                                                                                                                                                                                                                                                                                                                                                                                                                                                                                                                    |

SCHOLARONE™  
Manuscripts

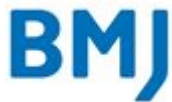

I, the Submitting Author has the right to grant and does grant on behalf of all authors of the Work (as defined in the below author licence), an exclusive licence and/or a non-exclusive licence for contributions from authors who are: i) UK Crown employees; ii) where BMJ has agreed a CC-BY licence shall apply, and/or iii) in accordance with the terms applicable for US Federal Government officers or employees acting as part of their official duties; on a worldwide, perpetual, irrevocable, royalty-free basis to BMJ Publishing Group Ltd ("BMJ") its licensees and where the relevant Journal is co-owned by BMJ to the co-owners of the Journal, to publish the Work in this journal and any other BMJ products and to exploit all rights, as set out in our [licence](#).

The Submitting Author accepts and understands that any supply made under these terms is made by BMJ to the Submitting Author unless you are acting as an employee on behalf of your employer or a postgraduate student of an affiliated institution which is paying any applicable article publishing charge ("APC") for Open Access articles. Where the Submitting Author wishes to make the Work available on an Open Access basis (and intends to pay the relevant APC), the terms of reuse of such Open Access shall be governed by a Creative Commons licence – details of these licences and which [Creative Commons](#) licence will apply to this Work are set out in our licence referred to above.

Other than as permitted in any relevant BMJ Author's Self Archiving Policies, I confirm this Work has not been accepted for publication elsewhere, is not being considered for publication elsewhere and does not duplicate material already published. I confirm all authors consent to publication of this Work and authorise the granting of this licence.

1  
2  
3  
4  
5  
6  
7  
8  
9  
10  
11  
12

# The clinical, humanistic, and economic outcomes, including experiencing of patient safety events, associated with admitting patients to single rooms compared with shared accommodation for acute hospital admissions. A narrative synthesis systematic literature review.

## Authors

13 Andrea Bertuzzi,<sup>2</sup> Alison Martin (0000-0003-4660-278X),<sup>2</sup> Nicola Clarke,<sup>2</sup> Cassandra Springate (0000-  
14 0003-1846-6901),<sup>2</sup> Rachel Ashton (0000-0003-1755-7975),<sup>3</sup> Wayne Smith (0000-0002-4297-1978),<sup>3</sup>  
15 Andi Orłowski (0000-0002-1463-9206),<sup>3</sup> Duncan McPherson (0000-0002-2560-8552)<sup>1</sup>  
16  
17

18  
19 <sup>1</sup>New Hospital Programme, NHS England and Improvement, Skipton House, 80 London Road, London  
20 SE1 6LH, UK  
21

22  
23 <sup>2</sup>Crystallise Ltd, 17 High Street, Stanford le Hope, Essex SS17 0HD, UK  
24

25  
26 <sup>3</sup>The Health Economics Unit, NHS Midlands and Lancashire Commissioning Support Unit, Heron  
27 House, 120 Grove Road, Stoke on Trent ST4 4LX, UK  
28

29  
30 Correspondence to: Dr Duncan McPherson, NHS England and Improvement, Skipton House, 80  
31 London Road, London, SE1 6LH. [duncan.mcpherson1@nhs.net](mailto:duncan.mcpherson1@nhs.net).  
32

33  
34  
35 Word count, excluding title page, abstract, references, figures and tables 7221  
36  
37  
38  
39  
40  
41  
42  
43  
44  
45  
46  
47  
48  
49  
50  
51  
52  
53  
54  
55  
56  
57  
58  
59  
60

## Summary

### What is already known on this topic

- The effects of single rooms versus shared accommodation on hospital inpatients' outcomes are not well understood
- Many studies are qualitative or narrative because randomised controlled trials are not practical and most comparative studies have only become possible after relocation to new facilities
- This systematic review investigated the potential range of impacts that inpatient single rooms and shared accommodation have on the health-care processes, outcomes, and costs

### What this study adds

- The evidence, though extensive, revealed no clear advantage for one type of inpatient hospital accommodation for many of the areas assessed.
- There was weak evidence indicating advantages for single bedrooms in some areas, such as lower risk of hospital acquired infection in adult intensive care and a range of outcomes in neonatal intensive care.
- Most patients preferred single rooms for privacy and some preferred shared accommodation for avoiding loneliness.

## Abstract

**Objectives:** Assess the impact of single rooms versus multioccupancy accommodation on inpatient health-care outcomes and processes.

**Design:** Systematic review.

**Setting:** Hospitals and secondary care units.

**Participants:** Inpatients receiving routine, emergency, high-dependency, or intensive care with a named type of hospital accommodation.

**Main outcome measures:** Qualitative synthesis of findings.

**Results:** Of 4,861 citations initially identified, 215 were deemed suitable for full-text review, of which 145 were judged to be relevant to this review. Five main method types were reported: 60 before-and-after comparisons, 75 contemporaneous comparisons, 18 qualitative studies of accommodation preferences, 10 evidence syntheses. All studies had methodological issues that potentially biased the results by not adjusting for confounding factors that are likely to have contributed to the outcomes. Ninety-two papers compared clinical outcomes for patients in single rooms versus shared accommodation, but no clearly consistent conclusions could be drawn about overall benefits of single rooms versus shared accommodation (multioccupancy rooms, bays, or wards). Single rooms were most likely to be associated with a small overall clinical benefit for the most severely ill patients, especially neonates in intensive care. Patients who preferred single rooms tended to do so for privacy, and for reduced disturbances. By contrast, men, older adults, children, and adolescents were more likely to prefer shared accommodation to avoid loneliness. While shared accommodation seemed to be the most cost-effective approach for construction, greater costs associated with building single rooms were small and likely to be recouped over time by other efficiencies.

**Conclusions:** The lack of difference between inpatient accommodation types in a large number of studies suggests that there would be little effect on clinical outcomes, particularly in routine care. Patients in intensive care areas are most likely to benefit from single rooms. Most patients preferred single rooms for privacy and some preferred shared accommodation for avoiding loneliness.

### STRENGTHS AND LIMITATIONS OF THIS STUDY

- This is the largest systematic review of this topic to date, including 145 published studies.
- Because of the limitations of the underlying publications it was not possible to undertake a stronger method such as formal meta-analysis.

### Keywords

hospital design; hospital construction; hospital management; hospital administration; health care facility environment; single room; single accommodation; single bedroom; multiple bedroom; single bedroom; multiple bedroom; multiple accommodation; multiple beds

## INTRODUCTION

The UK government announced that 40 new hospitals will be delivered in England by 2030.(1) The majority will be acute secondary care hospitals. One decision is whether beds should be in a single or multioccupancy room. Once each hospital is built it is difficult to change the proportion of single rooms to shared accommodation. It is important to get this right at the start. Many views have been expressed on the correct proportion of single rooms in a hospital in England. NHS England's National Medical Director, Stephen Powis, believes in "...single rooms being the default...".(2) In response David Oliver wrote that, "... our goal [should] perhaps be a greater proportion of single rooms, rather than these exclusively".(3) The topic has been debated in the British Medical Journal.(4) There is a need for a systematic analysis of the evidence on what is most likely to yield the best outcome for patients..

For some situations isolation of the patient in a single room is part of the clinical intervention. For example, a patient with severe immune compromise may be isolated to protect them from acquiring infection. Similarly, patients with highly transmissible infections may be isolated to prevent spread of infection. A single room is also used where privacy is extremely important, for example delivery units on maternity wards or for dying patients and their families. For most patients, accommodation in either a single or multioccupancy room is possible and may have a range of balanced risks and benefits. Patients may have a range of reasons for their preference including what would count as a good experience of hospital admission. However, there is no settled, obvious evidence base to illustrate what type of accommodation is best for overall patient outcomes or patient experience.

This study set out to find published evidence to investigate whether inpatient stays in single rooms or in shared accommodation (i.e., multioccupancy rooms, bays, or wards), have been associated with any impact on the processes undertaken by the hospital and on patients' outcomes. A wide range of clinical, social, and economic outcomes were included from the primary perspective of patients across a range of acute hospital types. Staff perspectives, while not formally assessed, were included if reported as part of a study on patient and caregiver views. The objective was to compare staying in a single room versus shared accommodation for care in which the type of accommodation was not part of the intervention itself. This systematic review protocol has been registered with PROSPERO, registration number CRD42022311689. Ethics approval was not required for this study.

## METHODS

### Identification of papers

We performed a systematic literature review of content in Medline (via PubMed) and Embase for comparative clinical trials, observational studies, and systematic literature reviews published in any language up to 17 February 2022. Additional searches were performed via Google Scholar and the National Institute for Health and Care Excellence. We used combinations of "hospital", "design", "management", "health care facility", "single", "multi", "room", "bay", "bed", and "accommodation", optimised for the search platform (see supplementary information – Appendix: Search Strategy). Eligible papers addressed care of adult and/or paediatric inpatients staying in hospital for routine, emergency, or intensive care and who were assigned to a particular accommodation type (single room or shared accommodation). We excluded papers that assessed long-stay patients, day patients, and those attending accident and emergency departments who were not later admitted to an acute hospital; patients who were relocated to a single room during admission (e.g., for isolation after contracting and infectious disease or for terminal care); no direct comparison condition for staying in a single room; non-clinical outcomes; and impact of care on

1  
2  
3 health-care professionals and/or support staff. We also excluded narrative reviews, perspective  
4 papers, letters, editorials, and conference abstracts with no relevant data.  
5

6 Retrieved abstracts were screened by two researchers (AB and NC) using the inclusion criteria in the  
7 appendix. Disagreements were resolved by discussion with the project leader. Shortlisted papers  
8 were retrieved as full texts. The reference lists of all papers included in this analysis were reviewed  
9 to identify any additional publications of primary research that met the inclusion criteria. Full papers  
10 were screened for relevance by two researchers (AB and AM) independently.  
11  
12

13 The quality of each paper was assessed by the same researcher using the Downs and Black checklist  
14 for observational studies<sup>(5)</sup> and the Joanna Briggs Institute checklists ([https://jbi.global/critical-](https://jbi.global/critical-appraisal-tools)  
15 [appraisal-tools](https://jbi.global/critical-appraisal-tools)) for qualitative studies and for systematic reviews. These checklists enable  
16 assessment of reporting quality, generalisability of findings, biases in measurements of intervention  
17 and outcome, confounding in the selection of participants, and power (whether negative findings  
18 could be the result of chance). Each quality assessment checklist score was converted to a  
19 percentage of the maximum possible score and were categorised for the purposes of this report into  
20 high (75–100%), moderate (50–74%), or low quality (<50%; see supplementary table 1).  
21  
22  
23  
24

### 25 **Data extraction and synthesis**

26 Data were extracted into an Excel spreadsheet and checked, with final adjudication by the project  
27 leader (AM), and were synthesised narratively, according to the methods of Campbell et al.<sup>(6)</sup> The  
28 fields for extraction were study methodology, baseline characteristics of participants (when  
29 provided), clinical outcomes, non-clinical outcomes, resource use, and costs. The clinical outcomes  
30 of interest were in-hospital mortality, overall mortality ( $\geq 30$  days), morbidity (e.g., falls,  
31 deterioration, new pressure ulcers, and complications), patient safety incidents, and hospital-  
32 acquired infections. Non-clinical outcomes of interest were patient and family member experiences,  
33 length of stay, cost of stay, experience of accommodation change and number of changes (for the  
34 same type of care) during admission, and impact on the caregivers and family members of  
35 dependent patients. Outcomes were assessed based on the measures used in the original articles.  
36 Extracted data were sorted by outcome and then by population and setting. Relevant data for each  
37 outcome were summarised narratively by comparing heterogeneity across studies in terms of  
38 whether differences were statistically significant and in favour of single room or shared  
39 accommodation.  
40  
41  
42  
43  
44  
45

### 46 **Statistical analysis**

47 As substantial heterogeneity across studies (e.g., how data were reported, study methods, etc) was  
48 expected, formal meta-analysis was not deemed feasible. Thus, no formal measures of  
49 heterogeneity or overall effect size were performed, and all data reported are descriptive. To aid  
50 comparison and assess consistency of the conclusions, data are presented in summary tables.  
51  
52

53 Certainty of findings was assessed based on whether the direction of benefit was consistently  
54 statistically significant for single rooms or shared accommodation (across all studies or those with  
55 the lowest risk of bias) or was inconsistent or not statistically significant.  
56

57 There are special areas of hospitals where responses to the intervention might differ, such as  
58 intensive-care or paediatric units and areas for women in labour. Therefore, we aimed to present  
59 data separately by different subgroups.  
60



## Patient and Public Involvement

Patients and the public were not involved in designing this study. The study aim was to establish what is already published in peer reviewed literature on the topic, including the views of patients, their parents or caregivers, and the public.

## Ethics Approval

This study did not require ethics approval as it was a study of preexisting published literature, not human participants.

## RESULTS

### Study characteristics

The initial searches returned 4,861 potentially relevant abstracts. After screening and removal of duplicates, 145 publications were included in this review (Figure 1). There were six main types of studies: 60 before-and-after comparisons (shared accommodation followed by relocation to single-rooms); 75 comparisons of patients allocated to single rooms compared with others simultaneously in shared accommodation; 18 qualitative studies recording the views of patients, caregivers, or healthcare professionals on accommodation preferences; 10 evidence syntheses, including systematic literature reviews, guidelines and other reports; and three economic evaluations of accommodation type (Figure 2). Some studies incorporated more than one design.

All studies had methodological issues that potentially biased the results by not adjusting for confounding factors that are likely to have contributed to the outcomes. In the 60 before-and-after trials, many factors other than accommodation changed due to moving into new facilities, such as unfamiliarity with new layouts and logistics. In the 75 contemporaneous comparisons, reasons for bed space allocations were not generally reported (e.g., availability, severity of illness), making their effects on the differences in outcomes unclear. Nine studies did not report baseline characteristics, and of those that did, only three reported no significant difference between age, sex, and comorbidity or health status of patients at baseline.

The quality of studies varied widely. Thirty-four studies were assigned high quality scores (75–100%) with a range of 78–100% (see supplementary table 1). Twenty-three studies were classified as being of low quality (<50%) with a range of 10–48%.

### Mortality

Eighteen studies reported mortality (see Figure 3 and supplementary Table 2). (7–24) Ten were before-and-after studies and the others were contemporary studies. Only one article scored less than 50% for quality and two had high quality scores. Six studies involved neonates/infants, one assessed children, and the remainder were concerned with adult/elderly care. The numbers of deaths were low, meaning that the studies might not have had enough patient-years of follow-up to detect small but statistically significant differences in mortality. Likewise, whether reported increases in mortality reflected true increases in risk or were due to confounding factors (e.g., unreported reasons for patients being allocated single rooms) is unclear.

### Routine care

Four studies involved patients receiving routine care,(7,8,16,22), all in adults, none of which found a significant difference in mortality between those in single rooms versus shared accommodation, including up to 1 year after discharge.

### Intensive care

Six studies assessed mortality among adults in ICUs.(12,13,17,18,20,24) One study by Bracco and colleagues(17) favoured single rooms. That study included 2,522 adults in ICUs in Canada and reported mortality of 2.9% among those in single rooms or cubicles compared with 8.3% among those in shared accommodation ( $p<0.001$ ). A study of 666 adults in ICUs in Korea with COVID-19 favoured shared accommodation, reporting 2.4% mortality versus 4.6% among those treated in single rooms but no statistical analysis of the difference was reported.(20) The other studies showed no differences between accommodation types.

Seven studies assessed mortality specifically among neonates in ICU.(9–11,15,19,21,23) Three favoured single rooms. Lehtonen et al.(23) assessed 4,662 neonates in 331 neonatal ICUs (NICUs) across 10 countries (Canada, Australia, New Zealand, Finland, Israel, Japan, Spain, Sweden, Switzerland, Italy) and found that those cared for in units with single rooms had lower odds of death or any major morbidity than those in units with no such facilities (adjusted odds ratio 0.76; 95% CI 0.64–0.89). Two papers reported reduced mortality in single rooms among a small population of neonates in intensive care, but statistical significance was not reported.(9,10) By contrast, two studies favoured shared accommodation. Puumala and colleagues(15) reported a lower percentage of deaths among 9,995 neonates. Harris et al.(19,25) assessed NICUs in 11 hospitals in the USA and found fewer deaths among neonates nursed in units with shared accommodation compared with units with single rooms. However, statistical significance was not reported in either.

Lazar et al(14) was the only study to assess children in a paediatric ICU and found no difference between accommodations types.

### Patient care and disease management

Twelve publications reported on outcomes related to patient care and disease management (see Figure 3 and supplementary Table 3).(26,8,27–36) All were in adults or non-specified age groups. Three were before-and-after studies, four were contemporaneous studies, and five were evidence syntheses. Four studies had quality scores below 50% but four had scores greater than 75%. All papers assessed routine care.

Most findings favoured single rooms. Significance was shown for improvements in cleanliness,(30) pain management(30), and interactions between patients and medical staff,(31) and other findings were descriptive. A study in Australia of 1,569 orthopaedic patients had fewer emergency calls due to deterioration in condition after a move to single rooms compared with patients in shared accommodation.(8) As room allocation was based partly on severity of illness, nurses tended to position themselves nearer higher-risk patients to aid visualisation. Lawson and Phiri(27) found better patient satisfaction with care and lower analgesic use in orthopaedic patients in single rooms.

Three systematic reviews found that patients in single rooms may have faster recovery due to better sleep and a more pleasant environment,(33) but there was no consistent effect on use of

1  
2  
3 medication.(35) An OECD WHO report concluded that single-room occupancy was associated with  
4 reduced pain scores, but due to a lack of detail had a very low quality score (14%).(37)

5  
6 Findings in favour of shared accommodation were feelings of safety(28) and less use of  
7 restraints.(34) In a comparison of only single rooms after a move to a new hospital with only shared  
8 accommodation in the previous hospital, falls and medication errors in the medical assessment unit  
9 increased notably immediately but by 9 months had fallen to levels lower than previously.(26)  
10 However, in the single-room ward for older adults, falls and pressure ulcers significantly increased  
11 after the move and remained higher than before moving. No similar trends were seen after the  
12 move in a control hospital with 50% single rooms and 50% shared accommodation, and this was the  
13 preferred choice of nurses before and after the move (38% and 40%, respectively).  
14  
15  
16  
17

### 18 **Maternity and neonatal care**

19  
20 Twenty-three studies were found that assessed maternity and neonatal care (see Figure 3 and  
21 supplementary Table 4).(10,11,15,38–57) Most (n=14) were before-and after studies and the  
22 remainder were contemporaneous studies. Three studies were low quality and only one had a high-  
23 quality score. Many of these studies included statistically assessed findings, with most favouring  
24 single rooms or showing no difference between accommodation types.  
25  
26  
27

#### 28 **Maternity care**

29  
30 Nine studies considered maternity care and perceptions of mothers and family  
31 members.(39,40,42,44,45,47,48,50,51)

32  
33 Harris and colleagues(41) assessed 976 low-risk patients, 583 of whom received all care in single  
34 rooms and 393 in separate labour, delivery, and recovery areas. While overall use of intrapartum  
35 interventions was similar, maternal outcomes were better in single rooms. After discharge, Erdevé et  
36 al(48) reported that mothers of babies in NICUs who received care in shared accommodation had  
37 significantly more acute care visits ( $p=0.046$ ), telephone consultations ( $p=0.01$ ), and  
38 rehospitalizations ( $p<0.05$ ) than those cared for in single rooms, and the reasons were more likely to  
39 be for issues related to prematurity like feeding difficulties compared with anatomical disorders. This  
40 perception is supported by the findings of Janssen et al,(42) which showed that mother in single  
41 rooms rated information and instructions at discharge as being clearer than those in shared  
42 accommodation.  
43  
44

45  
46 Multiple studies indicated that satisfaction with care teams was greater in single rooms, including  
47 duration and quality of interactions and needs met.(39,40,42–45,47) In one study participants felt  
48 that parental presence was greater in single rooms than in shared accommodation.(50) In a US  
49 study, women reported less pain in single rooms than in shared accommodation.(43)  
50  
51  
52

#### 53 **Neonatal care**

54  
55 Fourteen papers reported on outcomes in neonatal care.(10,15,38,41–43,46,49,52–57) Many of the  
56 results for neonates in ICUs showed no differences in outcomes between accommodation types.  
57 Significant improvements were seen in breastfeeding outcomes(10,15,55,58) and weight gain(46,58)  
58 in favour of single rooms. However, Tandberg et al(49) reported that longer-term weight gain (4  
59 months) was better after neonatal care in shared accommodation. In two studies, reduced apnoea  
60

1  
2  
3 events were associated with single rooms,(10,59) and in another study less need for mechanical  
4 ventilation was reported in single rooms.(55) Significantly reduced neonatal pain scores were also  
5 reported.(43)  
6  
7

### 8 9 **Complications of disease**

10 Twenty-three articles assessed disease complications (see Figure 3 and supplementary Table  
11 5).(7,8,16–18,22–24,26,34,37,41,43,48,54,56,60–64) Nine were before-and-after studies, 10 were  
12 contemporaneous studies, one used a mix of study designs, and three were evidence syntheses. Two  
13 articles had quality scores below 50% and two had scores greater than 75%. Findings generally  
14 favoured single rooms or showed no differences between accommodation types.  
15  
16  
17

### 18 19 **Routine care**

20 Eight papers assessed complications specifically in routine care and all assessed care of  
21 adults.(7,10,16,22,41,63–65) Only one study reported results with significance assessed, which  
22 showed reduced incidence of delirium among older adults with dementia nursed in single rooms  
23 (hazard ratio 0.66, 95% CI 0.48–0.93,  $p < 0.02$ ).(65) The Scottish guidelines on delirium recommend  
24 reducing light and noise and having familiar items around patients with or at risk of developing  
25 delirium,(64) which might be supported by this finding.  
26  
27

28 In a small relocation study ( $n=64$ )(26) pressure injuries seemed to be increased around tenfold in  
29 single rooms and falls in 50% or 100% shared accommodation, but a substantial change in case mix  
30 made this finding difficult to interpret. By contrast, in a larger non-controlled UK relocation study  
31 ( $n=1,569$ ), no significant difference was noted between different types of accommodation.  
32  
33

34 The findings for other complications, such as hip fracture rates following falls, thromboembolic  
35 events, infections, and other medical complications were not significantly different among  
36 orthopaedic patients in single rooms compared with those in shared accommodation in an  
37 Australian study.(42) Patients in single rooms were more likely to be female and much more likely to  
38 have private health insurance, which may have biased the outcomes.  
39  
40

### 41 42 **Intensive care**

43 Twelve papers specified assessments in ICU settings, of which three assessed adults(17,18,24) and  
44 nine concerned neonatal care.(23,43,48,54,56,60,60–62) In one study of 1,253 adults in Brazil,(18)  
45 delirium was significantly less likely among those in ICU single rooms than in shared accommodation,  
46 but no significant difference was seen between groups of elderly patients in different types of ICU  
47 accommodation in the Netherlands.(24) Organ failure was reported to be significantly lower in  
48 patients managed in single rooms in one study.(17) However, few data are available in adults and  
49 most studies reported no differences between accommodation types.  
50  
51  
52  
53

54 An international study of 4,662 preterm neonates found a significantly lower risk of death or any  
55 major morbidity, including sepsis and retinopathy of prematurity, among those nursed in NICUs with  
56 single family rooms (odds ratio 0.76, 95% CI 0.64-0.89).(23) In contrast, another study showed lower  
57 rates of necrotising enterocolitis and intraventricular haemorrhage in shared accommodation.(46)  
58 However, in other studies, rates of these and other serious complications were similar in all ward  
59  
60

types.(46,56,59,60) Lester et al(60) found that neonatal stress levels were reduced among babies in NICU single maternity care rooms compared with those in shared accommodation.

### Prevention of infection

Fifty-one studies discussed prevention of infection (see Figure 3 and supplementary Table 6).(8,10,11,13–15,17–19,21,26,34–36,46,49,53,56,61,66–98) Twenty were before-and-after studies, 28 were contemporaneous studies, one used a mix of study designs, and three were evidence syntheses. Seven had low quality scores and nine had high quality scores. More than half (n=33) studies reported statistically analysed data.

### Routine care

Routine care was assessed in adults in 10 studies(8,69,75,77,79,80,84,87,89,93) and eight involved mixed age populations and care levels that stated or were assumed to include adults and routine care.(26,35,36,67,71,72,88,95) Hospital-acquired infection rates were shown to be reduced in single rooms in six studies.(26,36,67,69,71,87,88) However, in Maben et al,(26) this finding depended on the ward mix: *Clostridium difficile* infections were reduced in single rooms where the split with shared accommodation was half and half, whereas all shared accommodation performed better than all single rooms. In Darley et al(67) this finding was only for *C difficile*, whereas hospital-acquired MRSA rates did not differ by accommodation type. Bocquet et al(78) and Munier-Marion et al(87) found reduced nosocomial influenza infections in single rooms and one study showed a reduced risk of norovirus infection.(82) By contrast, McDonald and colleagues(71) noted reduced infection rates for *Enterococcus* spp, *C difficile*, and MRSA. In a systematic review, Voigt et al(35) concluded that the quality of evidence did not support the use of single rooms over shared accommodation. Indeed, only two studies showed increased infections in shared accommodation.(26,83) Nevertheless, in one study patients(77) preferred single rooms for infection prevention. In a study of more than 1 million patients of all ages across 2018 hospitals in the USA, O'Neill and colleagues(95) found that single rooms were significantly associated with reductions in central-line-associated bloodstream infections.

Seven studies assessed routine care in children.(78,81,82,86,90,96,97) Two found a decrease in nosocomial infections in single rooms – one overall(78) and one for diarrhoea in gastrointestinal and neurosurgical units,(81) but the latter found no difference between accommodation types in a cardiological unit. In two large studies in Finland (n=1,927 and n=5,119), Kinnula and colleagues(96,97) saw increases in hospital-acquired infections among children admitted to shared accommodation in an infectious disease ward because there was no grouping by aetiology. All hospital-acquired infections with symptoms during the hospital stay and 49% of those manifesting after discharge led to diarrhoea. The risk of infection was doubled among children sharing accommodation with patients who had respiratory infections (OR 2.3, 95% CI: 1.1–4.8; p=0.03). Risk decreased per year of age. Among 83,334 children assessed in two hospitals, Quach et al(90) found significantly increased rates of respiratory infections when accommodation was more than 50% single rooms (rate per 1,000 patient-days 1.33, 95% CI 1.29–1.37).

### Intensive care

Outcomes in ICUs were reported specifically in 26 studies, 11 in adults and mixed-age populations,(13,17,18,66,68,70,73,85,91,92,98) one in children,(14) and 14 in neonates.(10,11,15,19,21,46,49,53,56,61,72,74,76,94)

Among adult populations, only one study showed outcomes in favour of shared accommodation, with reductions per 10,000 patient-days in cultures positive for *Enterobacter* spp, *Haemophilus*, *Streptococcus viridans*, *Acinetobacter* spp, *Streptococcus pneumoniae*, Group B *Streptococcus* spp, *Neisseria* spp, and MRSA.(73) However, in the same study, single rooms showed lower rates of infections with many common organisms, such as *Staphylococcus* spp, *C difficile*, and *Pseudomonas* spp. Four studies showed significant data on reduced bacterial infection and transmission in single rooms based on isolates and antibiotic use,(17,66,70,91) although in the study by Halaby et al,(70) transmission of *Morganella* spp, *Proteus* spp, *Serratia* spp, and *Pseudomonas* spp did not differ between accommodation types. Two studies indicated reduced risks of bloodstream infections in single rooms.(17,92) As for routine care, patients perceived infection prevention to be better in single rooms than in share spaces.(68)

Among neonates and among children in ICUs, the findings were mixed. In favour of shared accommodation, four studies reported reduced cases of nosocomial sepsis,(10,15) one reduced colonisation with multidrug-resistant organisms,(46) and one nosocomial infections with pneumonia.(19) Four studies indicated no difference between accommodation types for sepsis or septicaemia and/or found that the use of single rooms was associated with fewer sepsis cases.(15,49,56,74) Only one study showed an increase in sepsis in shared accommodation, and that was specifically in neonates born at or after term.(15)

### Patient safety

11 studies considered patient safety (see Figure 3 and supplementary Table 7).(8,16,22,26,34–36,65,84,99,100). Three were before-and-after studies, four were contemporaneous studies, one used mixed design, and three were evidence syntheses. Two had low quality scores and three had high quality scores. Most of the studies assessed routine care or mixed care populations, and generally the populations were adults and elderly people.

Overall, the data showed no differences between accommodation types or favoured shared accommodation. Only the OECD study indicated reduced risk of falls in single rooms,(36) but the quality of this study was deemed to be very low due to reporting very few details of the research. Significantly lower rates of falls were seen in multi-bed accommodation in two studies.(16,22) The study of Poncette et al,(100) which analysed alarm data in an ICU, found that the number of alarms per bed per day was higher in single rooms than in shared accommodation.

### Readmissions and reinterventions

Only two studies reported on readmissions and reinterventions (see Figure 3 and supplementary Table 8). They were both contemporaneous studies and one had a quality score of 74% and one of 78%. One showed that single rooms were associated with lower rates of rehospitalisation.(48) The other favoured shared accommodation, with fewer patients returning to theatre within 6 weeks of treatment.(63)

## Privacy

Forty-eight publications, including six evidence syntheses, reported on privacy (see supplementary table 9). (8,9,19,26,28,30–34,36,38–42,44,47,51,58,59,68,77,86,98,99,101–122) Eighteen were before-and-after studies, 23 were contemporaneous studies, one used mixed designs, and six were evidence syntheses. Nine had low quality scores but 19 had high quality scores. They were mainly descriptive studies but overwhelmingly favoured single rooms.

## Routine care

Twenty-eight studies assessed privacy among adults receiving routine care, (8,26,28,30,31,33,34,36,39,41,42,58,77,99,101,102,105,108,109,112–119) with seven of these reporting statistical analyses. (26,28,30,36,41,42,105,114) Key aspects of privacy in single rooms were improved confidentiality when discussing personal information, use of private bathrooms, and privacy during early post-partum care (e.g., assistance with feeding). However, in the study by Florey and colleagues, (105) 83% of patients in shared rooms also reported feeling that they had adequate privacy. Likewise, the systematic reviews by Taylor and colleagues (34) and Dowdeswell and colleagues (32) found advantages and disadvantages with regards to privacy in all studies they assessed. Patients reported feeling as though they could ask more questions or make more remarks in single rooms than in shared accommodation, and more scored physicians' responses as being empathetic. (31) Qualitative or descriptive studies also strongly supported greater privacy in single rooms. (8,77,99,101,102,108,109,112,115–118,121)

Four studies assessed routine care among children. (86,104,111,120) Boztepe et al (111) found that children did not rank privacy highly and were more concerned about procedures being painful. In this study many of the children had extensive history of hospitalisation. The other three studies reported greater privacy in single rooms, but children also seemed to enjoy the social aspect of shared accommodation. The main reasons for preferring single rooms were private bathrooms and the capacity for family members to stay. Sleep was an important aspect of care in single rooms for children and parents. (58,86,120)

## Intensive care

Nine studies reported on privacy for adults in ICUs, and generally the findings favoured single rooms. (32,34,36,40,44,47,59,68,110) Three studies reported statistical evidence of improved privacy in single rooms among adult patients. (36,40,44) The literature reviews by Dowdeswell and colleagues (32) and Taylor and colleagues (34) showed mixed findings among studies.

Eleven studies addressed neonatal care in ICUs. (9,19,38,40,44,47,51,98,103,106,107) All but two (38,51) favoured single rooms for privacy.

## Loneliness/isolation and family contact

Fifty-five publications, five were evidence syntheses, reported patients' views about loneliness or family contact associated with single-room accommodation (see Figure 4 and supplementary Table 10). (9,16,19,25,26,28,30,32,33,36,38,39,42,44,45,47–49,49,50,54,57–59,68,74,77,86,98,99,102,104–110,114,115,117–120,123–132). Twenty were before-and-after studies, 29 were contemporaneous studies, one used mixed study designs, and five were evidence syntheses. Only nine had quality scores less than 50%, while high quality scores were assigned to 17.

1  
2  
3 Two main themes seemed to be revealed in patients' perspectives: shared accommodation were  
4 strongly preferred for social interaction to avoid  
5 loneliness/isolation,(9,16,26,28,33,38,47,58,68,77,86,102,104,105,109,114–120,123,124,126,129)  
6 whereas single rooms were preferred for privacy (e.g., for bathroom use, during consultations and  
7 visits, and to spend with children, particularly  
8 neonates).(9,28,32,38,45,47,49,49,50,54,57,59,68,74,77,86,98,104–106,108–110,114,127,130,132)  
9  
10  
11

### 12 **Noise, disturbance, and sleep**

14 Forty-five publications, four of which were evidence syntheses, reported patients' views about noise,  
15 disturbance, and sleep associated with single-room accommodation (see Figure 4 and  
16 supplementary Table 11).(8,9,24–26,28,30,32,33,36,38–  
17 42,47,54,58,59,68,76,77,86,103,105,107,108,110,112–114,117–119,131,133–141) Sixteen were  
18 before-and-after studies, 24 were contemporaneous studies, one used mixed study designs, and  
19 four were evidence syntheses. Nine had quality scores less than 50% and 13 had high quality scores.  
20  
21

22 In general, patients felt that single rooms were quieter and led to less sleep disruption. However,  
23 measurement of noise levels showed that there were no substantial objective differences between  
24 single rooms and shared accommodation.(30,54,135) One study reported lower noise levels in single  
25 rooms, but the difference was not statistically assessed.(76) Stevens et al(54) and Meyer et al(139)  
26 found that respiratory support and other medical devices could raise noise levels in single rooms  
27 enough to disturb sleep even when ambient noise had been reduced. HCPs also reported that single  
28 rooms improved patients' sleep.(9) Poncette and colleagues(100) found that fewer alarms raised in  
29 shared accommodation reduced overall noise levels. One study also noted that patients preferred  
30 single rooms because they felt they were less likely to disturb other patients.(119) Most studies  
31 addressing sleep found that it was improved in single rooms.  
32  
33

34 (28,30,32,33,36,58,59,86,113,114,117,118,136,140) This was generally due to fewer disturbances  
35 and/or a perceived quieter environment than in shared accommodation. Hosseini and  
36 colleagues(114) and Sakr and colleagues(140) noted that the risk of new-onset insomnia was  
37 significantly higher among patients in shared accommodation (95.7% vs 75%,  $p=0.011$ ).  
38  
39

40 Humidity and temperature were discussed in one article. Van Enk and colleagues(135) reported that  
41 in a NICU with centrally controlled humidity, shared accommodation had non-significantly lower  
42 percentage of relative humidity than single rooms but showed much greater variance (26.8% ( $\pm 17.0$ )  
43 in single rooms vs 26.0% ( $\pm 89.0$ )). Both mean values were lower than the recommended range for  
44 NICU (30–60%). Temperature could be controlled within individual single rooms and mean values  
45 were significantly lower than those in the shared accommodation, which had central temperature  
46 control per nursery (mean 73.8°F [range 65.3–77.5°F] in single rooms vs 76.0°F [range 71.1–84.5°F],  
47  $p=0.0001$ ). More than 85% of readings in both, though, were within the recommended range of 72–  
48 78°F, although readings outside the range were too hot in shared accommodation and too cold in  
49 single rooms. The authors suggested that thermostats should be allowed to vary only within the  
50 recommended range.  
51  
52

53 Lighting was assessed in three studies, two of which favoured single rooms due to less illumination  
54 for neonates (40,54) and one study of patients with delirium that favoured lower light in a shared  
55 accommodation.(24)  
56  
57  
58  
59  
60



### Satisfaction with care

Fifty-one publications, six of which were evidence syntheses, reported patients' satisfaction with care (see Figure 4 and supplementary Table 12). (8,12,19,25,27,28,30,32,33,35,36,38–40,42,44,49,50,57,58,60,62,74,77,86,99,101,103,105,107–109,111–114,116–119,121,125,128,129,131,133,136,142–146) Fifteen were before-and-after studies, 29 were contemporaneous studies, one used mixed study designs, one was an economic analysis and six were evidence syntheses. The quality scores of ten studies were less than 50% and of 14 were 75–100%.

Overall, results show either little difference between accommodation types or results in favour of single rooms. Single rooms seemed to be favoured most by mothers in maternity units, whereas preference towards shared accommodation seemed to increase with rising age. The economic analysis found that patients were willing to pay for private care to have single rooms. (146)

### Routine care

Routine care was assessed in 30 studies (see supplementary table 12). (8,27,28,30,32,33,35,36,39,42,58,77,86,99,101,105,111–114,116–118,121,129,131,133,136,143,144) Patients preferred shared accommodation in seven studies. (33,86,116–118,129,133) Generally they preferred interaction with other patients, and in two reports they stated that they found the shared accommodation more secure and safe. (117,118) Specific reasons given for preferring single rooms were privacy, (30,58,77,99,112,131,133) comfort/environment, (27,42,101,108,143), level of care and information, effect on recovery, (32,36,42,101,113,114,136) and safety. (30,35)

### Intensive care

We found 24 reports of intensive care (12,19,25,32,36,38,40,44,50,57–60,62,74,103,107,108,125,128,130,131,143,145). Only two reported findings that favoured shared accommodation. Campbell-Yeo et al (50) found that in an open-bay NICU, mothers reported better self-efficacy and less uncertainty about their babies' health. Also in a NICU, Pineda and colleagues (57) found that the risk of stress among mothers was significantly lower in shared accommodation than in single rooms, although life stress did not differ between accommodation types. By contrast, other assessments of stress found that risk was reduced in single rooms (19,25,60,74,130) or did not differ. (50,62,130) Satisfaction with design/environment, where assessed, favoured single rooms. (59,108)

Findings on satisfaction with maternity care was greater for parents in single rooms in three studies (12,59,60) but did not differ between accommodation types in two. (74,145) Single rooms seemed to have little effect on postpartum depression or irritability, most measures not differing between accommodation types (57,62,74,130,145) and only four findings favouring single rooms. (19,25,50,130)

Only eight of the 51 studies were related to satisfaction with care in other patient populations, involving cardiovascular, cancer, adolescent, or mixed adult care. (12,32,36,58,108,128,131,143) All these studies' findings supported single rooms.

### Patient monitoring and safeguarding

Although the impact of single rooms on healthcare staff was not the focus of this review, 14 of the included publications reported the views of HCPs as well as patient-reported outcomes that we used to explore monitoring of patients (see Figure 4 and supplementary Table 13).(11,13,17,21,28,30,47,68,77,106,108,112,114,133) Four were before-and-after studies, eight were contemporaneous studies, one used mixed study designs, and one was an evidence synthesis. No study had a low-quality score. Five of the studies were classified as being of high quality.

Most of the studies presented descriptive/qualitative findings. Three studies reported statistically assessed data, all in relation to routine care and among adult patients. Two(28,114) favoured single rooms, reporting that availability to patients, meeting patients' needs, and access to patients were improved. The fourth study showed no difference between single rooms and shared accommodation for responding to patients' call alerts. One study reported that nurses felt they might spend longer with patients in single rooms, depriving other patients of as much care.(106) In another, safety of patients in units with single rooms was raised as an issue due to increased distances between nurses and patients and impeded observation of patients.(68)

### Patient confidentiality

Confidentiality was assessed in 11 studies (see Figure 4 and supplementary Table 14).(26,36,47,68,77,105,106,109,114,115) Five were before-and-after studies, four were contemporaneous studies, one used mixed study designs, and one was an evidence synthesis. Two studies had low quality scores while four had high quality scores.

All studies concluded that patient confidentiality was better maintained when patients were in single rooms, with one study finding no difference for adults with cardiovascular disease in ICU(108) (see supplementary table 14). Malcom et al(115) found that the lack of privacy and confidentiality in shared accommodation affected patients' relationships with other patients.

### Availability of beds, space requirements, and capital costs

Sixteen studies reported on beds, space, and costs associated with different accommodation types (see Figure 5 and supplementary Table 15).(10,12,13,21,26,27,38,57,67,90,96,97,106,108,126,147) Nine were before-and-after studies, six were contemporaneous studies, and one used mixed study designs. Two studies had quality scores below 50% and three were classified as being of high quality.

There did not seem to be strong evidence in favour of either accommodation type. The inclusion of single rooms substantially increases the amount of floor space required to achieve the same number of beds as in shared accommodation, with estimates suggesting between 30% and 50% more floor space being required per bed, which increases capital costs.(10,12,26,27,106,126,147) Shared accommodation provides greater flexibility to add beds in times of need.(13,21,57,90,97) Darley and colleagues(67) found that numbers of bed-days lost due to ward closures caused by norovirus outbreaks was greatly reduced after moving to a hospital with 75% single rooms from the previous 10% single rooms.

### Length of stay

Fifty-three publications, including two evidence syntheses, reported on length of stay associated with single-room accommodation (see Figure 5 and supplementary Table 16). (7–13,15–20,22–27,35,36,40,41,43,46–49,52,53,55,56,60–63,65,69,73–75,85,91,96,96,107,112,113,125,134,143,147–149) Twenty-eight were before-and-after studies, 23 were contemporaneous studies, one used mixed study designs, and two were evidence syntheses. Five of the studies were classified as being of low quality but only seven fell into the high-quality category. The evidence was highly mixed with no clear benefit from either accommodation type.

### Routine care

Of 20 studies assessing routine care, 18 concerned adults and the elderly. (7,8,22,26,27,35,36,41,63,65,69,77,112,113,134,143,147,149) Among these, eight found that length of stay was shorter in single rooms, (7,16,26,27,41,65,112,147,149) but in the study by Maben et al (26) this was true only for an older people's ward and not for a medical assessment unit, and in that by Lawson and Phiri, (27) while it was true for non-surgical orthopaedic patients and psychiatric patients, no difference was seen for surgical orthopaedic patients. One study found that length of stay was shorter in shared accommodation among older patients with dementia, overall and among those who had experienced inpatient falls. (22) No difference in overall length of stay was reported in seven studies, including two evidence syntheses. (8,35,36,63,69,134,143)

The two studies of routine care in children by Kinnula and colleagues showed no difference between accommodation types in one (96) but longer duration of admissions among children in shared accommodation in another. (97)

### Intensive care

Of 32 studies assessing length of stay in intensive care, 23 considered neonates (9–11,15,19,23,40,43,46,47,47,48,52,53,55,56,60–62,74,91,107,125,130,148) and nine adults. (12,13,17,18,20,24,73,75,85) As for routine care, the results were highly mixed.

Among the nine studies assessing care of adults in ICUs, five showed no significant differences between single rooms and shared accommodation. (12,13,24,24,75) Teltsch et al (73) assessed care after a change from multi-bed to single rooms and compared the findings to a hospital with no change. The length of stay in the ICU in the comparator hospital increased year on year from 3.8 days to 4.2 days from 2000 to 2005. While higher after the change to single rooms, the length of stay did not change substantially over the same period, and after adjustment was an estimated 10% lower overall (relative ratio 0.90, 95% CI 0–19%). Bracco and colleagues (17) reported that patients were able to stay longer in the same bed in single rooms during infection outbreaks in an ICU, although overall LOS was not significantly different.

In NICUs, statistically significant shorter durations of stay in hospital were reported in three studies. Puumala and colleagues (15) found that stays were shorter for very and extremely preterm babies, but there was no difference between accommodation types for moderately preterm babies, and stays for term and post-term babies were shorter in shared accommodation. Lehtonen et al (23) found that stays were on average 3.4 days shorter (95% CI 3.1–4.7) and van Veenendaal et al (74) found a median difference of 2 days in favour of single rooms. Qualitative/descriptive studies also favoured single rooms in five studies. (9,40,47,107) Three studies identified shorter stays in shared

1  
2  
3 accommodation,(19,56,148) but 13 found no difference between accommodation  
4 types(10,11,43,46,48,52,53,55,60–62,125,130).  
5  
6  
7

### 8 **Costs of care**

9 Nineteen publications, including two evidence syntheses, reported on costs or resource use  
10 associated with different types of accommodation (see Figure 5 and supplementary Table  
11 17).(8,16,19,22,25,26,35,41,54,63,91,107,110,132,133,146,148,150) Eight were before-and-after  
12 studies, seven were contemporaneous studies, two used mixed study designs, and two were  
13 evidence syntheses. Four studies had low quality scores and six had high quality scores.  
14  
15

16 Several studies reported multiple measures of costs and found evidence supporting both types of  
17 accommodation. Therefore, the evidence split was 10 studies finding in favour of single rooms, 10 in  
18 favour of shared accommodation and six showing no difference in measures.  
19

20 Boardman and Forbes recommended taking into account the following construction and running  
21 costs, given that single-room facilities required more space to construct: land costs, construction  
22 costs, maintenance (refinishing and updating), housekeeping and operating costs, and health care  
23 provision (potentially longer distances to cover). Maben et al(26,133) estimated in 2015 that the  
24 cost of building a hospital solely comprising single rooms could be around 5% more than building  
25 one with predominantly shared accommodation but suggested that the difference becomes  
26 marginal over time. Harris and colleagues(25) found that the most cost-effective configuration in  
27 terms of construction costs per square foot was a combination of open bays and single rooms.  
28  
29

30 Findings in favour of single rooms were due to reduced overall staffing costs,(41,150) reduced length  
31 of stay,(91,107) reduced waiting and transfer times,(146) higher proportions of patients being  
32 discharged to rehabilitation,(63) reduced infections,(91) and operational efficiencies.(35,148)  
33 Reasons favouring shared accommodation were lower cleaning and housekeeping costs,(26,133)  
34 perceived increased nursing staff,(26,148) and lower labour costs in NICUs.(148)  
35  
36  
37  
38

### 39 **DISCUSSION**

40 This systematic review identified a substantial body of evidence associated with hospital  
41 accommodation, yet no clearly consistent conclusions could be drawn about overall benefits of  
42 single rooms versus multi-bed ward spaces. The narrative and heterogeneous nature of much of the  
43 evidence also meant that a formal statistical synthesis, such as a meta-analysis, was not feasible.  
44 Nevertheless, some themes did emerge and might be worth considering further. Single rooms were  
45 most likely to be associated with overall clinical benefit for the most severely ill patients, especially  
46 neonates in intensive care, although the evidence is mixed even in these high-risk populations.  
47 Patients who preferred single rooms tended to do so for privacy, particularly having a private  
48 bathroom, and for reduced disturbances. By contrast, there were distinct patterns of men, older  
49 adults, children, and adolescents being more likely to prefer shared accommodation, particularly for  
50 the social aspects. While mixed accommodation types seemed to be the most cost-effective  
51 approach to construction because the capital cost of single room building is higher than that for  
52 shared accommodation, the running costs seem likely to be recouped over time by other  
53 efficiencies.  
54  
55  
56  
57

58 While patients and HCPs expressed preferences, health-care outcomes seem unlikely to be  
59 substantially affected by hospital accommodation. This is reassuring because most patients also  
60

1  
2  
3 have little influence over this aspect of their care. Likewise, HCPs might also have little influence  
4 over which accommodation type their patients are assigned. Patient or family preferences for single  
5 rooms are particularly strong in NICUs and maternity wards, but other groups, in particular men,  
6 older adults and adolescents, are more likely to prefer shared accommodation. The split of  
7 accommodation and whether the predictable adverse effects of accommodation design can be  
8 mitigated in these areas would be worth considering at the planning stages of new buildings.  
9  
10

11 The average cost per patient of units comprising only single rooms was lower than those consisting  
12 of only shared accommodation. Mean direct cost per patient in a single room has been estimated to  
13 be 15.5% lower for neonates in ICU and 24% lower for care in maternity units but may be similar or  
14 reduced in adults in routine care wards. Shorter length of stay was an important contributor to this  
15 difference and could increase the number of patients who can be treated in the beds available.  
16 However, the effects found were small and local variations may change the economic picture for a  
17 particular hospital. It is also unclear how far the reduced length of stay was due to the single room,  
18 and how much was caused by confounding factors associated with being in a new hospital. Nearly all  
19 the studies we considered were from high-income regions and mostly based in European or  
20 anglophone countries. Thus, policy makers should incorporate local building and labour costs in  
21 decisions.  
22  
23  
24

25 Determining the impact of moving to single-room wards will therefore always need to overcome the  
26 impact of confounding factors such as concomitant changes to processes and improvements in other  
27 facilities and services that may also have led to the changes, or that may have acted in opposition to  
28 the direct effects of the different accommodation.  
29

30 This study has some limitations. Of 215 articles originally retrieved, we selected 145 for review,  
31 which is still a large number. None of the 145 studies used randomised study designs. Randomised  
32 controlled studies are not practical to assess hospital accommodation and, therefore, most studies  
33 were prone to bias. In particular, in hospitals with mixed single rooms and shared accommodation,  
34 patients must be allocated to the rooms, which will be partly due to their medical condition or other  
35 personal factors and partly due to bed availability at the time of admission. This introduces selection  
36 bias, as the reasons why patients were in single rooms was often not reported. We minimised this  
37 bias by excluding studies where the allocation to single rooms or shared accommodation was known  
38 to be for an apparent clinical purpose. Additionally, 60 of the publications compared outcomes  
39 before and after moving from shared accommodation to single rooms. This introduced confounding,  
40 as many factors other than the studied intervention would have changed at the same time, so  
41 attributing the outcome to the intervention alone is misleading. The opportunity of building a new  
42 hospital is rare. While it provides an ideal platform for before-and-after studies, nearly all of these  
43 studies were of a single hospital, so the total number of hospitals studied is low, meaning that  
44 uncertainty about risks and benefits remains after this systematic review.  
45  
46  
47  
48

49 In practical terms, although there are still uncertainties about the true impact of changing to single  
50 room wards, the 145 publications synthesised in this report show that the clinical and economic  
51 consequences of such a change are likely to be modest. Focussed research on the impact of  
52 accommodation type on hospital acquired airborne transmitted infections may be warranted, as  
53 may studies of sufficient duration to examine long term productivity changes after opening a new  
54 hospital. Because the global effect sizes found were modest, the effects within national systems or  
55 for specialist hospitals might be different in size and direction from the global. In particular, none of  
56 the included studies were in low or middle income countries, so generalisability to those settings is  
57 difficult.  
58  
59  
60

## AUTHORSHIP

All authors wrote sections of the final manuscript. DMcP conceived the study and defined the research question. AM defined the detailed method and arbitrated disagreements. AB and NC conducted the literature screening and data extraction. CS developed the figures and summary tables. RA jointly drafted and edited the final manuscript. AO and WS contributed to conception and organisation of the study design and contributed to editing the manuscript. The corresponding author attests that all listed authors meet authorship criteria and that no others meeting the criteria have been omitted.

The Corresponding Author has the right to grant on behalf of all authors and does grant on behalf of all authors, a worldwide licence to the Publishers and its licensees in perpetuity, in all forms, formats and media (whether known now or created in the future), to i) publish, reproduce, distribute, display and store the Contribution, ii) translate the Contribution into other languages, create adaptations, reprints, include within collections and create summaries, extracts and/or, abstracts of the Contribution, iii) create any other derivative work(s) based on the Contribution, iv) to exploit all subsidiary rights in the Contribution, v) the inclusion of electronic links from the Contribution to third party material where-ever it may be located; and, vi) licence any third party to do any or all of the above.

The lead author affirms that the manuscript is an honest, accurate, and transparent account of the study being reported; that no important aspects of the study have been omitted; and that any discrepancies from the study as originally planned (and, if relevant, registered) have been explained.

## COMPETING INTERESTS

No authors have had financial relationships with any organisations that might have an interest in the submitted work in the previous 3 years. No authors have other relationships or activities that could appear to have influenced the submitted work.

## FUNDING

The study was funded by The New Hospital Programme, Department of Health and Social Care, which commissioned the overall research area but had no input into the study design, the collection, analysis, and interpretation of data, the writing of the report, or decision to submit the article for publication. All authors, external and internal, had full access to all of the data (including statistical reports and tables) in the study and can take responsibility for the integrity of the data and the accuracy of the data analysis.

## REGISTRATION

PROSPERO registration number CRD42022311689, registered on 2<sup>nd</sup> March 2022, after preliminary searches were undertaken and before formal screening began.

## DATA AVAILABILITY

All data relevant to the study are included in the article or uploaded as supplementary information

## REFERENCES

1. UK Government. PM confirms £3.7 billion for 40 hospitals in biggest hospital building programme in a generation [Internet]. GOV.UK. [cited 2022 Jul 11]. Available from: <https://www.gov.uk/government/news/pm-confirms-37-billion-for-40-hospitals-in-biggest-hospital-building-programme-in-a-generation>
2. Health and Social Care Committee. Oral evidence: Clearing the backlog after the pandemic, HC 599 [Internet]. 2021 [cited 2022 Jul 11]. Available from: <https://committees.parliament.uk/oralevidence/2817/pdf/>
3. Oliver D. David Oliver: Should single rooms be the default for NHS inpatients? *BMJ*. 2021 Nov 3;n2612.
4. Pennington H, Isles C. Should hospitals provide all patients with single rooms? *BMJ*. 2013 Sep 24;347(sep24 2):f5695–f5695.
5. Downs SH, Black N. The feasibility of creating a checklist for the assessment of the methodological quality both of randomised and non-randomised studies of health care interventions. *J Epidemiol Community Health*. 1998 Jun 1;52(6):377–84.
6. Campbell M, McKenzie JE, Sowden A, Katikireddi SV, Brennan SE, Ellis S, et al. Synthesis without meta-analysis (SWiM) in systematic reviews: reporting guideline. *BMJ*. 2020 Jan 16;368:l6890.
7. Cantoni N, Weisser M, Buser A, Arber C, Stern M, Heim D, et al. Infection prevention strategies in a stem cell transplant unit: impact of change of care in isolation practice and routine use of high dose intravenous immunoglobulins on infectious complications and transplant related mortality - Cantoni - 2009 - *European Journal of Haematology* - Wiley Online Library [Internet]. [cited 2022 Jul 11]. Available from: <https://onlinelibrary.wiley.com/doi/10.1111/j.1600-0609.2009.01249.x>
8. Davis M, Elliott R, Hills R, Fry M. Single-Room Ward Design and Its Impact on Service and Patient Outcomes: An Evaluation Study. *Orthop Nurs*. 2019 Oct;38(5):317–25.
9. Domanico R, Davis DK, Coleman F, Davis BO. Documenting the NICU design dilemma: parent and staff perceptions of open ward versus single family room units. *J Perinatol*. 2010 May;30(5):343–51.
10. Domanico R, Davis DK, Coleman F, Davis BO. Documenting the NICU design dilemma: comparative patient progress in open-ward and single family room units. *J Perinatol*. 2011 Apr;31(4):281–8.
11. Jansen SJ, Lopriore E, Berkhout RJM, van der Hoeven A, Saccoccia B, de Boer JM, et al. The Effect of Single-Room Care Versus Open-Bay Care on the Incidence of Bacterial Nosocomial Infections in Pre-Term Neonates: A Retrospective Cohort Study. *Infect Dis Ther*. 2021 Mar;10(1):373–86.
12. Jongerden IP, Slooter AJ, Peelen LM, Wessels H, Ram CM, Kesecioglu J, et al. Effect of intensive care environment on family and patient satisfaction: a before–after study. *Intensive Care Med*. 2013 Sep 1;39(9):1626–34.

13. Jung J, Choe PG, Choi S, Kim E, Lee HY, Kang CK, et al. Reduction in the acquisition rate of carbapenem-resistant *Acinetobacter baumannii* (CRAB) after room privatization in an intensive care unit. *J Hosp Infect*. 2022 Mar 1;121:14–21.
14. Lazar I, Abukaf H, Sofer S, Peled N, Leibovitz E. Impact of Conversion from an Open Ward Design Paediatric Intensive Care Unit Environment to All Isolated Rooms Environment on Incidence of Bloodstream Infections and Antibiotic Resistance in Southern Israel (2000 to 2008) [Internet]. [cited 2022 Jul 11]. Available from: [https://journals.sagepub.com/doi/10.1177/0310057X1504300106?url\\_ver=Z39.88-2003&rfr\\_id=ori:rid:crossref.org&rfr\\_dat=cr\\_pub%20%20pubmed](https://journals.sagepub.com/doi/10.1177/0310057X1504300106?url_ver=Z39.88-2003&rfr_id=ori:rid:crossref.org&rfr_dat=cr_pub%20%20pubmed)
15. Puumala SE, Rich RK, Roy L, Reynolds R, Jimenez FE, Opollo JG, et al. Single-family room neonatal intensive care unit design: do patient outcomes actually change? | *Journal of Perinatology* [Internet]. [cited 2022 Jul 11]. Available from: <https://www.nature.com/articles/s41372-019-0584-6>
16. Singh I, Okeke J, Edwards C. Outcome of in-patient falls in hospitals with 100% single rooms and multi-bedded wards. *Age Ageing*. 2015 Nov;44(6):1032–5.
17. Bracco D, Dubois MJ, Bouali R, Eggimann P. Single rooms may help to prevent nosocomial bloodstream infection and cross-transmission of methicillin-resistant *Staphylococcus aureus* in intensive care units. *Intensive Care Med*. 2007 May 1;33(5):836–40.
18. Caruso P, Guardian L, Tiengo T, dos Santos LS, Junior PM. ICU Architectural Design Affects the Delirium Prevalence: A Comparison Between Single-Bed and Multibed Rooms\*. *Crit Care Med*. 2014 Oct;42(10):2204–10.
19. Harris DD, Shepley MM, White RD, Kolberg KJS, Harrell JW. The impact of single family room design on patients and caregivers: executive summary. *J Perinatol*. 2006 Oct;26(3):S38–48.
20. Hyun M, Lee JY, Kwon YS, Kim JY, Park JS, Park S, et al. COVID-19: Comparing the applicability of shared room and single room occupancy. *Transbound Emerg Dis*. 2021 Jul;68(4):2059–65.
21. Julian S, Burnham CAD, Sellenriek P, Shannon WD, Hamvas A, Tarr PI, et al. Impact of Neonatal Intensive Care Bed Configuration on Rates of Late-Onset Bacterial Sepsis and Methicillin-Resistant *Staphylococcus aureus* Colonization. *Infect Control Hosp Epidemiol*. 2015 Oct;36(10):1173–82.
22. Knight S, Singh I. Profile of inpatient falls in patients with dementia: A prospective comparative study between 100% single rooms and traditional multibedded wards. *J Clin Gerontol Geriatr*. 2016 Sep;7(3):87–92.
23. Lehtonen L, Lee SK, Kusuda S, Lui K, Norman M, Bassler D, et al. Family Rooms in Neonatal Intensive Care Units and Neonatal Outcomes: An International Survey and Linked Cohort Study. *J Pediatr*. 2020 Nov;226:112-117.e4.
24. Zaal IJ, Spruyt CF, Peelen LM, van Eijk MMJ, Wientjes R, Schneider MME, et al. Intensive care unit environment may affect the course of delirium. *Intensive Care Med*. 2013 Mar;39(3):481–8.
25. Harris D, McCuskey M, White R. [impact\\_of\\_single\\_family\\_nicu\\_rooms\\_1.pdf](#) [Internet]. 2006 [cited 2022 Jul 12]. Available from: [https://www.healthdesign.org/system/files/impact\\_of\\_single\\_family\\_nicu\\_rooms\\_1.pdf](https://www.healthdesign.org/system/files/impact_of_single_family_nicu_rooms_1.pdf)



- 1
- 2
- 3
- 4 26. Maben J, Griffiths P, Penfold C, Simon M, Anderson JE, Robert G, et al. One size fits all? Mixed
- 5 methods evaluation of the impact of 100% single-room accommodation on staff and patient
- 6 experience, safety and costs. *BMJ Qual Saf.* 2016 Apr 1;25(4):241–56.
- 7
- 8 27. Lawson B, Phiri M. Hospital design. Room for improvement. *Health Serv J.* 2000 Jan
- 9 20;110(5688):24–6.
- 10
- 11 28. Ehrlander W, Ali F, Chretien KC. Multioccupancy hospital rooms: Veterans' experiences and
- 12 preferences. *J Hosp Med.* 2009;4(8):E22–7.
- 13
- 14 29. McKeown K, Haase T, Pratschke J, Twomey S, Donovan H, Engling F. Determinants of care
- 15 outcomes for patients who die in hospital in Ireland: a retrospective study. *BMC Palliat Care.*
- 16 2015 Dec;14(1):11.
- 17
- 18 30. Nahas S, Patel A, Duncan J, Nicholl J, Nathwani D. Patient Experience in Single Rooms
- 19 Compared with the Open Ward for Elective Orthopaedic Admissions. *Musculoskeletal Care.*
- 20 2016 Mar;14(1):57–61.
- 21
- 22
- 23 31. van de Glind I, van Dulmen S, Goossensen A. Physician–patient communication in single-
- 24 bedded versus four-bedded hospital rooms. *Patient Educ Couns.* 2008 Nov 1;73(2):215–9.
- 25
- 26 32. Dowdeswell B, Erskine J, Heasman M. A Report for NHS Estates, England by the EU Health
- 27 Property Network. :40.
- 28
- 29 33. Søndergaard SF, Beedholm K, Kolbæk R, Frederiksen K. Patients' and Nurses' Experiences of All
- 30 Single-Room Hospital Accommodation: A Scoping Review. *HERD Health Environ Res Des J.* 2022
- 31 Jan;15(1):292–314.
- 32
- 33
- 34 34. Taylor E, Card AJ, Piatkowski M. Single-Occupancy Patient Rooms: A Systematic Review of the
- 35 Literature Since 2006. *HERD Health Environ Res Des J.* 2018 Jan;11(1):85–100.
- 36
- 37 35. Voigt J, Mosier M, Darouiche R. Private Rooms in Low Acuity Settings: A Systematic Review of
- 38 the Literature. *HERD Health Environ Res Des J.* 2018 Jan;11(1):57–74.
- 39
- 40 36. OECD, World Health Organization. Improving Healthcare Quality in Europe: Characteristics,
- 41 Effectiveness and Implementation of Different Strategies [Internet]. OECD; 2019 [cited 2022 Jul
- 42 11]. Available from: [https://www.oecd-ilibrary.org/social-issues-migration-health/improving-](https://www.oecd-ilibrary.org/social-issues-migration-health/improving-healthcare-quality-in-europe_b11a6e8f-en)
- 43 [healthcare-quality-in-europe\\_b11a6e8f-en](https://www.oecd-ilibrary.org/social-issues-migration-health/improving-healthcare-quality-in-europe_b11a6e8f-en)
- 44
- 45 37. Rechel B, European Health Property Network, European Observatory on Health Systems and
- 46 Policies, editors. Capital investment for health: case studies from Europe. Copenhagen,
- 47 Denmark: European Health Property Network : European Observatory on Health Systems and
- 48 Policies; 2009. 190 p. (Observatory studies series).
- 49
- 50
- 51 38. Stelwagen M, van Kempen A, Westmaas A, Vet E, Scheele F. Parents' Experiences With a Model
- 52 of Integrated Maternity and Neonatal Care Designed to Empower Parents. *J Obstet Gynecol*
- 53 *Neonatal Nurs.* 2021 Mar;50(2):181–92.
- 54
- 55 39. Olson ME, Smith MJ. An evaluation of single-room maternity care. *Health Care Manag.* 1992
- 56 Sep;11(1):43–9.
- 57
- 58
- 59
- 60

- 1
  - 2
  - 3
  - 4
  - 5
  - 6
  - 7
  - 8
  - 9
  - 10
  - 11
  - 12
  - 13
  - 14
  - 15
  - 16
  - 17
  - 18
  - 19
  - 20
  - 21
  - 22
  - 23
  - 24
  - 25
  - 26
  - 27
  - 28
  - 29
  - 30
  - 31
  - 32
  - 33
  - 34
  - 35
  - 36
  - 37
  - 38
  - 39
  - 40
  - 41
  - 42
  - 43
  - 44
  - 45
  - 46
  - 47
  - 48
  - 49
  - 50
  - 51
  - 52
  - 53
  - 54
  - 55
  - 56
  - 57
  - 58
  - 59
  - 60
40. Carter BS, Carter A, Bennett S. Families' views upon experiencing change in the neonatal intensive care unit environment: from the 'baby barn' to the private room. *J Perinatol Off J Calif Perinat Assoc.* 2008 Dec;28(12):827–9.
41. Harris SJ, Farren MD, Janssen PA, Klein MC, Lee SK. Single Room Maternity Care: Perinatal Outcomes, Economic Costs, and Physician Preferences. *J Obstet Gynaecol Can.* 2004 Jul;26(7):633–40.
42. Janssen PA, Klein MC, Harris SJ, Soolsma J, Seymour LC. Single Room Maternity Care and Client Satisfaction. *Birth.* 2000;27(4):235–43.
43. Lester BM, Hawes K, Abar B, Sullivan M, Miller R, Bigsby R, et al. Single-Family Room Care and Neurobehavioral and Medical Outcomes in Preterm Infants. *Pediatrics.* 2014 Oct 1;134(4):754–60.
44. Swanson JR, Peters C, Lee BH. NICU redesign from open ward to private room: a longitudinal study of parent and staff perceptions. *J Perinatol.* 2013 Jun;33(6):466–9.
45. Toivonen M, Lehtonen L, Löyttyniemi E, Axelin A. Effects of single-family rooms on nurse-parent and nurse-infant interaction in neonatal intensive care unit. *Early Hum Dev.* 2017 Mar 1;106–107:59–62.
46. van der Hoeven A, Bekker V, Jansen SJ, Saccoccia B, Berkhout RJM, Lopriore E, et al. Impact of transition from open bay to single room design neonatal intensive care unit on multidrug-resistant organism colonization rates. *J Hosp Infect.* 2022 Feb;120:90–7.
47. Bodack E, Schenk O, Karutz H. Die Einrichtung von Einzelzimmern auf neonatologischen Intensivstationen – Auswirkungen auf die Betreuung aus Sicht der Eltern. *Z Für Geburtshilfe Neonatol.* 2016 Jun;220(3):124–9.
48. Erdeve O, Arsan S, Yigit S, Armangil D, Atasay B, Korkmaz A. The impact of individual room on rehospitalization and health service utilization in preterms after discharge. *Acta Paediatr.* 2008;97(10):1351–7.
49. Tandberg BS, Flacking R, Markestad T, Grundt H, Moen A. Parent psychological wellbeing in a single-family room versus an open bay neonatal intensive care unit. Baud O, editor. *PLOS ONE.* 2019 Nov 5;14(11):e0224488.
50. Campbell-Yeo M, Kim T, Disher T, Richardson B, Dol J, Bishop T, et al. Do Single-Family Rooms Increase Parental Presence, Involvement, and Maternal Well-Being in Neonatal Intensive Care? *J Perinat Neonatal Nurs.* 2021 Oct;35(4):350–61.
51. Dowling DA, Blatz MA, Graham G. Mothers' Experiences Expressing Breast Milk for Their Preterm Infants: Does NICU Design Make a Difference? *Adv Neonatal Care.* 2012 Dec;12(6):377–84.
- 52.
53. Erickson C, Kattelman K, Ren C, Helseth CC, Stevens DC. Traditional open-bay versus single-family room neonatal intensive care unit: a comparison of selected nutrition outcomes. *Res Rep Neonatol.* 2011 Mar;15.
- 54.
- 55.
- 56.
- 57.
58. Hourigan SK, Subramanian P, Hasan NA, Ta A, Klein E, Chettout N, et al. Comparison of Infant Gut and Skin Microbiota, Resistome and Virulome Between Neonatal Intensive Care Unit (NICU) Environments. *Front Microbiol.* 2018 Jun 25;9:1361.

- 1
  - 2
  - 3
  - 4
  - 5
  - 6
  - 7
  - 8
  - 9
  - 10
  - 11
  - 12
  - 13
  - 14
  - 15
  - 16
  - 17
  - 18
  - 19
  - 20
  - 21
  - 22
  - 23
  - 24
  - 25
  - 26
  - 27
  - 28
  - 29
  - 30
  - 31
  - 32
  - 33
  - 34
  - 35
  - 36
  - 37
  - 38
  - 39
  - 40
  - 41
  - 42
  - 43
  - 44
  - 45
  - 46
  - 47
  - 48
  - 49
  - 50
  - 51
  - 52
  - 53
  - 54
  - 55
  - 56
  - 57
  - 58
  - 59
  - 60
54. Stevens DC, Helseth CC, Thompson PA, Pottala JV, Khan MA, Munson DP. A Comprehensive Comparison of Open-Bay and Single-Family-Room Neonatal Intensive Care Units at Sanford Children's Hospital. *HERD*. 2012;5(4):23–39.
55. Grundt H, Tandberg BS, Flacking R, Drageset J, Moen A. Associations Between Single-Family Room Care and Breastfeeding Rates in Preterm Infants. *J Hum Lact*. 2021 Aug;37(3):593–602.
56. Vohr B, McGowan E, McKinley L, Tucker R, Keszler L, Alksninis B. Differential Effects of the Single-Family Room Neonatal Intensive Care Unit on 18- to 24-Month Bayley Scores of Preterm Infants. *J Pediatr*. 2017 Jun;185:42-48.e1.
57. Pineda RG, Stransky KE, Rogers C, Duncan MH, Smith GC, Neil J, et al. The single-patient room in the NICU: maternal and family effects. *J Perinatol*. 2012 Jul;32(7):545–51.
58. Nassery W, Landgren K. Parents' Experience of Their Sleep and Rest When Admitted to Hospital with Their Ill Child: A Qualitative Study. *Compr Child Adolesc Nurs*. 2019 Oct 2;42(4):265–79.
59. Stevens DC, Helseth CC, Khan MA, Munson DP, Reid EJ. A Comparison of Parent Satisfaction in an Open-Bay and Single-Family Room Neonatal Intensive Care Unit. *HERD Health Environ Res Des J*. 2011 Apr;4(3):110–23.
60. Lester BM, Salisbury AL, Hawes K, Dansereau LM, Bigsby R, Laptook A, et al. 18-Month Follow-Up of Infants Cared for in a Single-Family Room Neonatal Intensive Care Unit. *J Pediatr*. 2016 Oct;177:84–9.
61. Monson BB, Eaton-Rosen Z, Kapur K, Liebenthal E, Brownell A, Smyser CD, et al. Differential Rates of Perinatal Maturation of Human Primary and Nonprimary Auditory Cortex. *eneuro*. 2018 Jan;5(1):ENEURO.0380-17.2017.
62. Erdevi O, Arsan S, Canpolat F, Ertem I, Karagol B, Atasay B, et al. Does Individual Room Implemented Family-Centered Care Contribute to Mother–Infant Interaction in Preterm Deliveries Necessitating Neonatal Intensive Care Unit Hospitalization? *Am J Perinatol*. 2009 Feb;26(02):159–64.
63. Felice Tong YY, Karunaratne S, Youlden D, Gupta S. The Impact of Room-Sharing on Length of Stay After Total Hip or Knee Arthroplasty: A Retrospective Study. *Arthroplasty Today*. 2021 Apr;8:289-294.e2.
64. Scottish Intercollegiate Guidelines Network, Healthcare Improvement Scotland. *Delirium: a booklet for people who have experienced delirium, and for their carers*. 2020.
65. Blandfort S, Gregersen M, Rahbek K, Juul S, Damsgaard EM. Single-bed rooms in a geriatric ward prevent delirium in older patients. *Aging Clin Exp Res*. 2020 Jan;32(1):141–7.
66. Bonizzoli M, Bigazzi E, Peduto C, Tucci V, Zagli G, Pecile P, et al. Microbiological survey following the conversion from a bay-room to single-room intensive care unit design. *J Hosp Infect*. 2011 Jan;77(1):84–6.
67. Darley ESR, Vasant J, Leeming J, Hammond F, Matthews S, Albur M, et al. Impact of moving to a new hospital build, with a high proportion of single rooms, on healthcare-associated infections and outbreaks. *J Hosp Infect*. 2018 Feb;98(2):191–3.

- 1  
2  
3 68. Ferri M, Zygun DA, Harrison A, Stelfox HT. Evidence-based design in an intensive care unit: End-  
4 user perceptions. *BMC Anesthesiol*. 2015 Dec;15(1):57.  
5
- 6 69. Gregersen M, Mellemkjær A, Foss CH, Blandfort S. Use of single-bed rooms may decrease the  
7 incidence of hospital-acquired infections in geriatric patients: A retrospective cohort study in  
8 Central Denmark region. *J Health Serv Res Policy*. 2021 Oct;26(4):282–8.  
9
- 10 70. Halaby T, al Naiemi N, Beishuizen B, Verkooijen R, Ferreira JA, Klont R, et al. Impact of single  
11 room design on the spread of multi-drug resistant bacteria in an intensive care unit.  
12 *Antimicrob Resist Infect Control*. 2017 Dec;6(1):117.  
13
- 14 71. McDonald EG, Dendukuri N, Frenette C, Lee TC. Time-Series Analysis of Health Care–Associated  
15 Infections in a New Hospital With All Private Rooms. *JAMA Intern Med*. 2019 Nov  
16 1;179(11):1501.  
17
- 18 72. Song X, Soghier L, Floyd TT, Harris TR, Short BL, DeBiasi RL. Reassessing the need for active  
19 surveillance of extended-spectrum beta-lactamase–producing Enterobacteriaceae in the  
20 neonatal intensive care population. *Infect Control Hosp Epidemiol*. 2018 Dec;39(12):1436–41.  
21
- 22 73. Teltsch DY, Hanley J, Loo V, Goldberg P, Gursahaney A, Buckeridge DL. Infection Acquisition  
23 Following Intensive Care Unit Room Privatization. *Arch Intern Med [Internet]*. 2011 Jan 10  
24 [cited 2022 Jul 14];171(1). Available from:  
25 <http://archinte.jamanetwork.com/article.aspx?doi=10.1001/archinternmed.2010.469>  
26
- 27 74. van Veenendaal NR, van der Schoor SRD, Heideman WH, Rijnhart JJM, Heymans MW, Twisk  
28 JWR, et al. Family integrated care in single family rooms for preterm infants and late-onset  
29 sepsis: a retrospective study and mediation analysis. *Pediatr Res*. 2020 Oct;88(4):593–600.  
30
- 31 75. Vietri NJ, Dooley DP, Davis CE, Longfield JN, Meier PA, Whelen AC. The effect of moving to a  
32 new hospital facility on the prevalence of methicillin-resistant *Staphylococcus aureus*. *Am J*  
33 *Infect Control*. 2004 Aug;32(5):262–7.  
34
- 35 76. Walsh WF, McCullough KL, White RD. Room for improvement: nurses' perceptions of providing  
36 care in a single room newborn intensive care setting. *Adv Neonatal Care Off J Natl Assoc*  
37 *Neonatal Nurses*. 2006 Oct;6(5):261–70.  
38
- 39 77. Bevan V, Edwards C, Woodhouse K, Singh I. Dignified care for older people: Mixed methods  
40 evaluation of the impact of the hospital environment - single rooms or multi-bedded wards:  
41 *Healthy Aging Res*. 2016;5(13):1–8.  
42
- 43 78. Bocquet A, Wintenberger C, Lupo J, Morand P, Pavese P, Gallouche M, et al. Description of an  
44 influenza outbreak in a French university hospital and risk factors of nosocomial influenza. *Eur J*  
45 *Clin Microbiol Infect Dis*. 2021 Apr;40(4):879–84.  
46
- 47 79. Cobo J, Asensio Á, Moreno S, Navas E, Pintado V, Oliva J, et al. Risk factors for nosocomial  
48 transmission of multidrug-resistant tuberculosis due to *Mycobacterium bovis* among HIV-  
49 infected patients. :6.  
50
- 51 80. Everts RJ, Hanger HC, Jennings LC, Hawkins A, Sainsbury R. Outbreaks of influenza A among  
52 elderly hospital inpatients. *N Z Med J*. 1996 Jul 26;109(1026):272–4.  
53  
54  
55  
56  
57  
58  
59  
60

- 1
- 2
- 3 81. Ford-Jones EL, Mindorff CM, Gold R, Petric M. THE INCIDENCE OF VIRAL-ASSOCIATED
- 4 DIARRHEA AFTER ADMISSION TO A PEDIATRIC HOSPITAL. *Am J Epidemiol*. 1990
- 5 Apr;131(4):711–8.
- 6
- 7 82. Fraenkel Cj, Inghammar M, Söderlund-Strand A, Johansson PJH, Böttiger B. Risk factors for
- 8 hospital norovirus outbreaks: impact of vomiting, genotype, and multi-occupancy rooms. *J*
- 9 *Hosp Infect*. 2018 Apr;98(4):398–403.
- 10
- 11 83. Jou J, Ebrahim J, Shofer FS, Hamilton KW, Stern J, Han JH. Environmental Transmission of
- 12 *Clostridium difficile* : Association Between Hospital Room Size and *C. difficile* Infection. *Infect*
- 13 *Control Hosp Epidemiol*. 2015 May;36(5):564–8.
- 14
- 15 84. Lorenz SG, Dreher HM. Hospital Room Design and Health Outcomes of the Aging Adult. *PA P E*
- 16 *R S*. 2011;4(2):14.
- 17
- 18 85. Mattner F, Rüdén AS, Mattner L, Chaberny IF, Ziesing S, Strueber M, et al. Thoracic organ
- 19 transplantation may not increase the risk of bacterial transmission in intensive care units. *Int J*
- 20 *Hyg Environ Health*. 2007 Mar;210(2):139–45.
- 21
- 22 86. Morgan H. Single and shared accommodation for young patients in hospital: Helen Morgan
- 23 considers the importance of designing hospital units that ensure patient safety and security
- 24 without limiting the opportunity for socialisation. *Paediatr Care*. 2010 Sep 28;22(8):20–4.
- 25
- 26 87. Munier-Marion E, Bénet T, Régis C, Lina B, Morfin F, Vanhems P. Hospitalization in double-
- 27 occupancy rooms and the risk of hospital-acquired influenza: a prospective cohort study. *Clin*
- 28 *Microbiol Infect*. 2016 May;22(5):461.e7-461.e9.
- 29
- 30 88. Park SH, Stockbridge EL, Miller TL, O’Neill L. Private patient rooms and hospital-acquired
- 31 methicillin-resistant *Staphylococcus aureus*: A hospital-level analysis of administrative data
- 32 from the United States. Klein EY, editor. *PLOS ONE*. 2020 Jul 9;15(7):e0235754.
- 33
- 34 89. Pilmis B, Billard-Pomares T, Martin M, Clarempuy C, Lemezo C, Saint-Marc C, et al. Can
- 35 environmental contamination be explained by particular traits associated with patients? *J Hosp*
- 36 *Infect*. 2020 Mar;104(3):293–7.
- 37
- 38 90. Quach C, Shah R, Rubin LG. Burden of Healthcare-Associated Viral Respiratory Infections in
- 39 Children’s Hospitals. *J Pediatr Infect Dis Soc*. 2018 Feb 19;7(1):18–24.
- 40
- 41 91. Sadatsafavi H, Niknejad B, Zadeh R, Sadatsafavi M. Do cost savings from reductions in
- 42 nosocomial infections justify additional costs of single-bed rooms in intensive care units? A
- 43 simulation case study. *J Crit Care*. 2016 Feb;31(1):194–200.
- 44
- 45 92. Stiller A, Schröder C, Gropmann A, Schwab F, Behnke M, Geffers C, et al. ICU ward design and
- 46 nosocomial infection rates: a cross-sectional study in Germany. *J Hosp Infect*. 2017
- 47 Jan;95(1):71–5.
- 48
- 49 93. Vaisman A, Jula M, Wagner J, Winston LG. Examining the association between hospital-onset
- 50 *Clostridium difficile* infection and multiple-bed room exposure: a case-control study. *Infect*
- 51 *Control Hosp Epidemiol*. 2018 Sep;39(9):1068–73.
- 52
- 53 94. Washam MC, Ankrum A, Haberman BE, Staat MA, Haslam DB. Risk Factors for *Staphylococcus*
- 54 *aureus* Acquisition in the Neonatal Intensive Care Unit: A Matched Case-Case-Control Study.
- 55 *Infect Control Hosp Epidemiol*. 2018 Jan;39(1):46–52.
- 56
- 57
- 58
- 59
- 60

- 1  
2  
3 95. O'Neill L, Park SH, Rosinia F. The role of the built environment and private rooms for reducing  
4 central line-associated bloodstream infections. Kamolz LP, editor. PLOS ONE. 2018 Jul  
5 27;13(7):e0201002.  
6
- 7 96. Kinnula SE, Renko M, Tapiainen T, Knuutinen M, Uhari M. Hospital-associated infections during  
8 and after care in a paediatric infectious disease ward. *J Hosp Infect*. 2008 Apr;68(4):334–40.  
9
- 10 97. Kinnula S, Buettcher M, Tapiainen T, Renko M, Vepsäläinen K, Lantto R, et al. Hospital-  
11 associated infections in children: a prospective post-discharge follow-up survey in three  
12 different paediatric hospitals. *J Hosp Infect*. 2012 Jan;80(1):17–24.  
13
- 14 98. Liu LX, Mozafarinia M, Axelin A, Feeley N. Parents' Experiences of Support in NICU Single-  
15 Family Rooms. *Neonatal Netw NN*. 2019 Mar 1;38(2):88–97.  
16
- 17 99. Reid J, Wilson K, Anderson KE, Maguire CPJ. Older inpatients' room preference: single versus  
18 shared accommodation. *Age Ageing*. 2015 Mar;44(2):331–3.  
19
- 20 100. Poncette AS, Wunderlich MM, Spies C, Heeren P, Vorderwülbecke G, Salgado E, et al. Patient  
21 Monitoring Alarms in an Intensive Care Unit: Observational Study With Do-It-Yourself  
22 Instructions. *J Med Internet Res*. 2021 May 28;23(5):e26494.  
23
- 24 101. Janssen PA, Dennis CL, Reime B. Development and psychometric testing of The Care in  
25 Obstetrics: Measure for Testing Satisfaction (COMFORTS) scale. *Res Nurs Health*. 2006  
26 Feb;29(1):51–60.  
27
- 28 102. Anåker A. "It's Lonely": Patients' Experiences of the Physical Environment at a Newly Built  
29 Stroke Unit. *Des J*. :12.  
30
- 31 103. Carlson B, Walsh S, Wergin T, Schwarzkopf K, Ecklund S. Challenges in design and transition to  
32 a private room model in the neonatal intensive care unit. *Adv Neonatal Care Off J Natl Assoc  
33 Neonatal Nurses*. 2006 Oct;6(5):271–80.  
34
- 35 104. Curtis P, Northcott A. The impact of single and shared rooms on family-centred care in  
36 children's hospitals. *J Clin Nurs*. 2017 Jun;26(11–12):1584–96.  
37
- 38 105. Florey L, Flynn R, Isles C. Patient Preferences for Single Rooms or Shared Accommodation in a  
39 District General Hospital. *Scott Med J*. 2009 May;54(2):5–8.  
40
- 41 106. Jones L, Peters K, Rowe J, Sheeran N. The Influence of Neonatal Nursery Design on Mothers'  
42 Interactions in the Nursery. *J Pediatr Nurs*. 2016 Oct;31(5):e301-312.  
43
- 44 107. Milford C, Zapalo B, Davis G. Transition to an Individual-Room NICU Design: Process and  
45 Outcome Measures. *Neonatal Netw*. 2008 Sep;27(5):299–305.  
46
- 47 108. Real K, Fay L. Using Systems Theory to Examine Patient and Nurse Structures, Processes, and  
48 Outcomes in Centralized and Decentralized Units. :16.  
49
- 50 109. Roos AKØ, Skaug EA, Grøndahl VA, Helgesen AK. Trading company for privacy: A study of  
51 patients' experiences. *Nurs Ethics*. 2020 Jun;27(4):1089–102.  
52
- 53 110. Apple M. A Comparative Evaluation of Swedish Intensive Care Patient Rooms. *HERD Health  
54 Environ Res Des J*. 2014 Apr;7(3):78–93.  
55  
56  
57  
58  
59  
60

- 1  
2  
3  
4  
5  
6  
7  
8  
9  
10  
11  
12  
13  
14  
15  
16  
17  
18  
19  
20  
21  
22  
23  
24  
25  
26  
27  
28  
29  
30  
31  
32  
33  
34  
35  
36  
37  
38  
39  
40  
41  
42  
43  
44  
45  
46  
47  
48  
49  
50  
51  
52  
53  
54  
55  
56  
57  
58  
59  
60
111. Boztepe H, Çınar S, Ay A. School-age children's perception of the hospital experience. *J Child Health Care*. 2017 Jun;21(2):162–70.
  112. Deitrick LM, Bokovoy J, Panik A. The "Dance" Continues ... Evaluating Differences in Call Bell Use Between Patients in Private Rooms and Patients in Double Rooms Using Ethnography. *J Nurs Care Qual*. 2010 Oct;25(4):279–87.
  113. Douglas CH, Douglas MR. Patient-centred improvements in health-care built environments: perspectives and design indicators. *Health Expect*. 2005 Sep;8(3):264–76.
  114. Hosseini SB, Bagheri M. Comparison of Patient Satisfaction with Single Patient Rooms Versus Shared Patient Rooms. *Ann Mil Health Sci Res [Internet]*. 2018 Jul 8 [cited 2022 Jul 20];15(4). Available from: <https://brief.land/amhsr/articles/80199.html>
  115. Malcolm HA. Does privacy matter? Former patients discuss their perceptions of privacy in shared hospital rooms. *Nurs Ethics*. 2005 Mar;12(2):156–66.
  116. Nash P, Vanhoof J, Hall S, Arulmani U, Tarzynski-Potempa R, Unnebrink K, et al. Randomized Crossover Comparison of Injection Site Pain with 40 mg/0.4 or 0.8 mL Formulations of Adalimumab in Patients with Rheumatoid Arthritis. *Rheumatol Ther*. 2016 Dec;3(2):257–70.
  117. Persson E, Määttä S. To provide care and be cared for in a multiple-bed hospital room: *Care in a multiple-bed hospital room*. *Scand J Caring Sci*. 2012 Dec;26(4):663–70.
  118. Persson E, Anderberg P, Kristensson Ekwall A. A room of one's own - Being cared for in a hospital with a single-bed room design. *Scand J Caring Sci*. 2015 Jun;29(2):340–6.
  119. Rowlands J, Noble S. How does the environment impact on the quality of life of advanced cancer patients? A qualitative study with implications for ward design. *Palliat Med*. 2008 Sep;22(6):768–74.
  120. Schalkers I, Dedding CWM, Bunders JFG. '[I would like] a place to be alone, other than the toilet' - Children's perspectives on paediatric hospital care in the Netherlands. *Health Expect*. 2015 Dec;18(6):2066–78.
  121. Bradbury-Jones C, Rattray J, Jones M, MacGillivray S. Promoting the health, safety and welfare of adults with learning disabilities in acute care settings: a structured literature review. *J Clin Nurs*. 2013;22(11–12):1497–509.
  122. Mental Welfare Commission for Scotland. *Psychiatr Bull*. 1991 Apr;15(4):254–5.
  123. Anåker A, von Koch L, Sjöstrand C, Bernhardt J, Elf M. A comparative study of patients' activities and interactions in a stroke unit before and after reconstruction—The significance of the built environment. Martinuzzi A, editor. *PLOS ONE*. 2017 Jul 20;12(7):e0177477.
  124. Cusack L, Wiechula R, Schultz T, Dollard J, Maben J. Anticipated advantages and disadvantages of a move to 100% single-room hospital in Australia: A case study. *J Nurs Manag*. 2019 Jul;27(5):963–70.
  125. Kainiemi E, Hongisto P, Lehtonen L, Pape B, Axelin A. Effects of single family room architecture on parent–infant closeness and family centered care in neonatal environments—a single-center pre–post study. *J Perinatol*. 2021 Sep;41(9):2244–51.

- 1  
2  
3 126. Rosbergen ICM, Tonello I, Clark RA, Grimley RS. Does hospital design impact on patient activity  
4 levels and time spent alone? *Disabil Rehabil*. 2022 Jun 19;44(13):3173–80.  
5  
6 127. Darcy Mahoney A, White RD, Velasquez A, Barrett TS, Clark RH, Ahmad KA. Impact of  
7 restrictions on parental presence in neonatal intensive care units related to coronavirus  
8 disease 2019. *J Perinatol*. 2020 Sep;40(S1):36–46.  
9  
10 128. de Matos LBN, Fumis RRL, Nassar Junior AP, Lacerda FH, Caruso P. Single-Bed or Multibed  
11 Room Designs Influence ICU Staff Stress and Family Satisfaction, But Do Not Influence ICU Staff  
12 Burnout. *HERD*. 2020 Apr;13(2):234–42.  
13  
14 129. Pease NJ, Finlay IG. Do patients and their relatives prefer single cubicles or shared wards?  
15 *Palliat Med*. 2002 Jul;16(5):445–6.  
16  
17 130. Tandberg BS, Frøslie KF, Flacking R, Grundt H, Lehtonen L, Moen A. Parent-Infant Closeness,  
18 Parents' Participation, and Nursing Support in Single-Family Room and Open Bay NICUs. *J*  
19 *Perinat Neonatal Nurs*. 2018 Dec;32(4):E22–32.  
20  
21 131. Taylor E, Card AJ, Piatkowski M. Single-Occupancy Patient Rooms: A Systematic Review of the  
22 Literature Since 2006. *HERD Health Environ Res Des J*. 2018 Jan;11(1):85–100.  
23  
24 132. Chaudhury H, Mahmood A, Valente M. The use of single patient rooms versus multiple  
25 occupancy rooms in acute care environments [Internet]. 2004 [cited 2022 Jul 21]. Available  
26 from:  
27 [https://www.healthdesign.org/sites/default/files/use\\_of\\_single\\_patient\\_rooms\\_v\\_multiple\\_oc](https://www.healthdesign.org/sites/default/files/use_of_single_patient_rooms_v_multiple_occ_rooms-acute_care.pdf)  
28 [c.\\_rooms-acute\\_care.pdf](https://www.healthdesign.org/sites/default/files/use_of_single_patient_rooms_v_multiple_occ_rooms-acute_care.pdf)  
29  
30 133. Maben J, Griffiths P, Penfold C, Simon M, Pizzo E, Anderson J, et al. Evaluating a major  
31 innovation in hospital design: workforce implications and impact on patient and staff  
32 experiences of all single room hospital accommodation [Internet]. Southampton (UK): NIHR  
33 Journals Library; 2015 [cited 2022 Jul 21]. (Health Services and Delivery Research). Available  
34 from: <http://www.ncbi.nlm.nih.gov/books/NBK274434/>  
35  
36 134. Pyrke RJL, McKinnon MC, McNeely HE, Ahern C, Langstaff KL, Bieling PJ. Evidence-Based Design  
37 Features Improve Sleep Quality Among Psychiatric Inpatients. *HERD Health Environ Res Des J*.  
38 2017 Oct;10(5):52–63.  
39  
40 135. Van Enk RA, Steinberg F. Comparison of Private Room with Multiple-Bed Ward Neonatal  
41 Intensive Care Unit Environments. *HERD Health Environ Res Des J*. 2011 Oct;5(1):52–63.  
42  
43 136. Eberhard-Gran M, Eskild A, Opjordsmoen S, Schei B. Maternity care - sleep, rest and  
44 satisfaction. :10.  
45  
46 137. Edéll-Gustafsson U, Angelhoff C, Johnsson E, Karlsson J, Mörelius E. Hindering and buffering  
47 factors for parental sleep in neonatal care. A phenomenographic study. *J Clin Nurs*. 2015  
48 Mar;24(5–6):717–27.  
49  
50 138. Foo CT, O'Driscoll DM, Ogeil RP, Lubman D, Young AC. Barriers to sleep in acute hospital  
51 settings. *Sleep Breath*. 2022 Jun;26(2):855–63.  
52  
53 139. Meyer TJ, Eveloff SE, Bauer MS, Schwartz WA, Hill NS, Millman RP. Adverse Environmental  
54 Conditions in the Respiratory and Medical ICU Settings. *Chest*. 1994 Apr;105(4):1211–6.  
55  
56  
57  
58  
59  
60



- 1  
2  
3 140. Sakr N, Hallit S, Mattar H. Incidence of and Factors Associated with New-Onset Insomnia  
4 Among Lebanese Hospitalised Patients: A single-centre study. *Sultan Qaboos Univ Med J*  
5 *SQUMJ*. 2021 Jun 21;21(2):e210-220.  
6  
7  
8 141. Tegnestedt C, Günther A, Reichard A, Bjurström R, Alvarsson J, Martling CR, et al. Levels and  
9 sources of sound in the intensive care unit - an observational study of three room types: Levels  
10 and sources of sound in a multidisciplinary ICU. *Acta Anaesthesiol Scand*. 2013 Sep;57(8):1041-  
11 50.  
12  
13 142. Stevens DC, Helseth CC, Khan MA, Munson DP, Reid EJ. A Comparison of Parent Satisfaction in  
14 an Open-Bay and Single-Family Room Neonatal Intensive Care Unit. *HERD Health Environ Res*  
15 *Des J*. 2011 Apr;4(3):110-23.  
16  
17 143. Labarère J, Fourny M, Jean-Phillippe V, Marin-Pache S, Patrice F. Refinement and validation of  
18 a French in-patient experience questionnaire. *Int J Health Care Qual Assur*. 2004 Jan  
19 1;17(1):17-25.  
20  
21 144. Miller NO, Friedman SB, Coupey SM. Adolescent preferences for rooming during  
22 hospitalization. *J Adolesc Health*. 1998 Aug;23(2):89-93.  
23  
24 145. Watson J, DeLand M, Gibbins S, MacMillan York E, Robson K. Improvements in Staff Quality of  
25 Work Life and Family Satisfaction Following the Move to Single-Family Room NICU Design. *Adv*  
26 *Neonatal Care*. 2014 Apr;14(2):129-36.  
27  
28 146. Boardman AE, Forbes D. A Benefit-Cost Analysis of Private and Semi-Private Hospital Rooms. *J*  
29 *Benefit-Cost Anal*. 2011 Jan 3;2(1):1-27.  
30  
31 147. Ruka K, Kenichi K, Juno K. Study on the effect of private rooms in wards on bed management  
32 COMPASRtAuTdlyVEonSTthUeDleEfSfeOcNt oHfOpSriPvIaTtAeLr-BoEoDmMs  
33 AinNwAGaErdMsEoNnT bBeEdTWmEaEnNagement. :9.  
34  
35 148. Stevens DC, Thompson PA, Helseth CC, Hsu B, Khan MA, Munson DP. A comparison of the  
36 direct cost of care in an open-bay and single-family room NICU. *J Perinatol*. 2014  
37 Nov;34(11):830-5.  
38  
39 149. Blandfort S, Gregersen M, Rahbek K, Juul S, Damsgaard EM. Analgesic and psychoactive  
40 medications and the risk of falls in relation to delirium in single-bed rooms compared to  
41 multiple-bed rooms in geriatric inpatients. *Aging Clin Exp Res*. 2020 Aug;32(8):1493-9.  
42  
43 150. Reed G, Schmid M. Nursing Implementation of Single-Room Maternity Care. *J Obstet Gynecol*  
44 *Neonatal Nurs*. 1986 Sep;15(5):386-9.  
45  
46  
47  
48  
49  
50  
51  
52  
53  
54  
55  
56  
57  
58  
59  
60

## FIGURE LEGENDS

Figure 1. Selection of papers for review

Figure 2. Percentage of studies reporting data in favour of either single-room or shared-room design, according to the type of data available and outcome reported

Figure 3. Clinical outcomes represented by the total sample size with data for that outcome, by level of care and the type of data reported and room design favoured

Figure 4. Patient-experience outcomes represented by the total sample size with data for that outcome, by level of care and the type of data reported and room design favoured

Figure 5. Economic outcomes represented by the total sample size with data for that outcome, by level of care and the type of data reported and room design favoured

1  
2  
3  
4  
5  
6  
7  
8  
9  
10  
11  
12  
13  
14  
15  
16  
17  
18  
19  
20  
21  
22  
23  
24  
25  
26  
27  
28  
29  
30  
31  
32  
33  
34  
35  
36  
37  
38  
39  
40  
41  
42  
43  
44  
45  
46  
47  
48  
49  
50  
51  
52  
53  
54  
55  
56  
57  
58  
59  
60

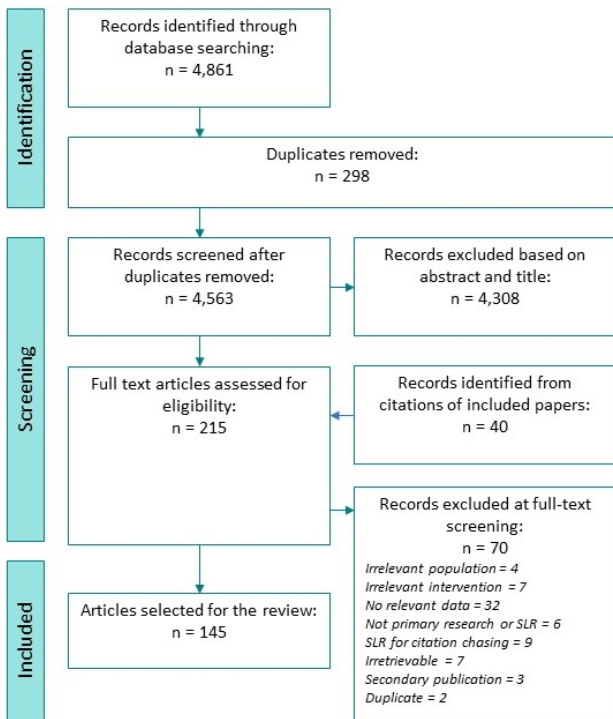

Figure 1. Selection of papers for review

190x275mm (96 x 96 DPI)

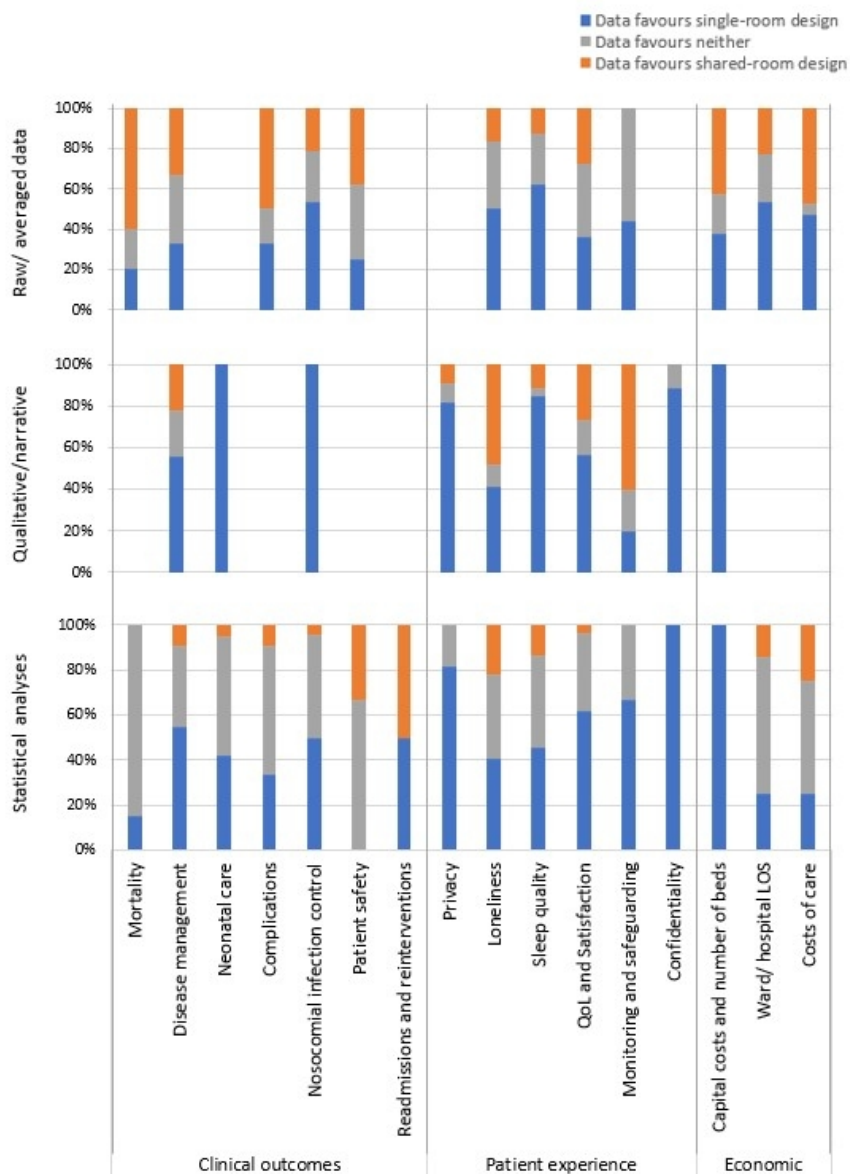

Figure 2. Percentage of studies reporting data in favour of either single-room or shared-room design, according to the type of data available and outcome reported

144x199mm (96 x 96 DPI)

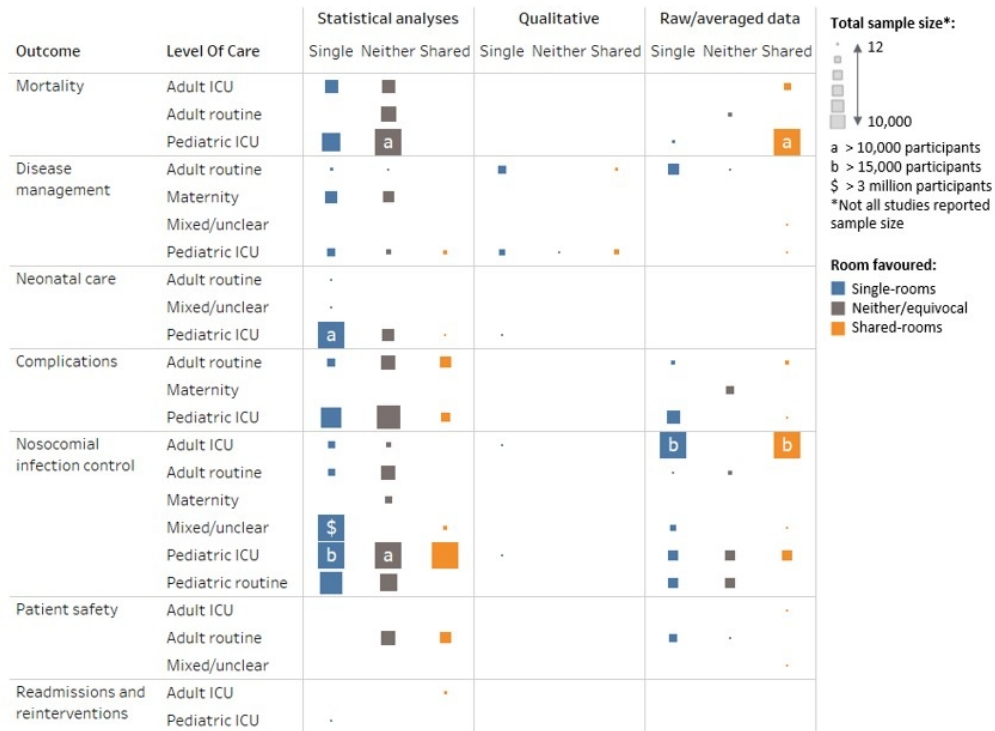

Figure 3. Clinical outcomes represented by the total sample size with data for that outcome, by level of care and the type of data reported and room design favoured

221x165mm (96 x 96 DPI)

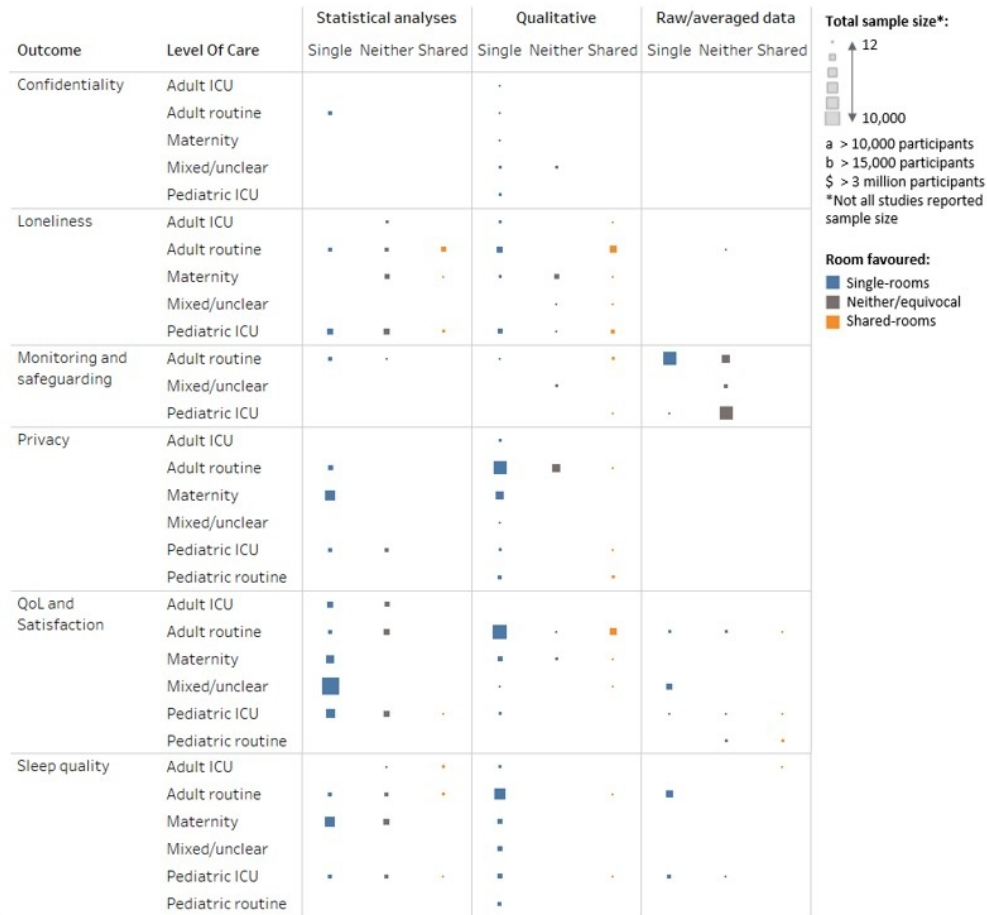

Figure 4. Patient-experience outcomes represented by the total sample size with data for that outcome, by level of care and the type of data reported and room design favoured

209x195mm (96 x 96 DPI)

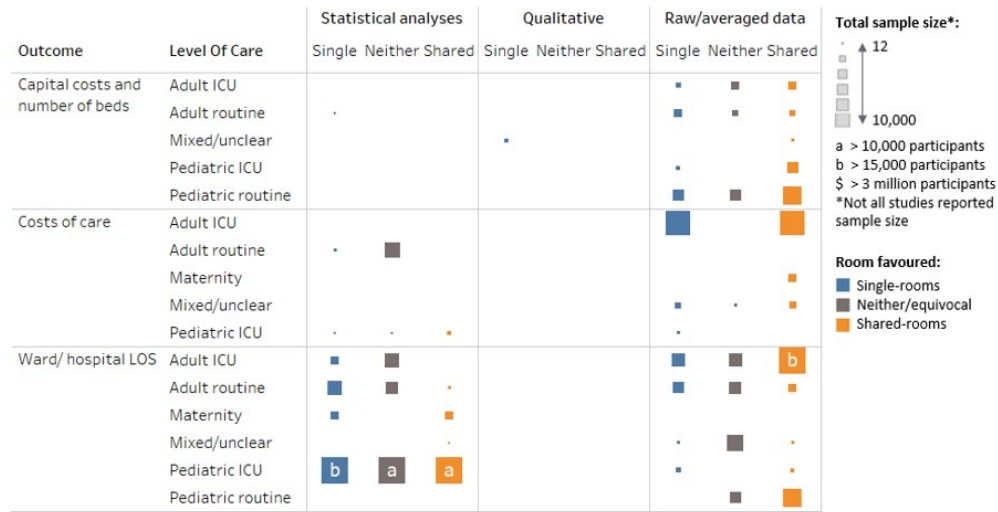

Figure 5. Economic outcomes represented by the total sample size with data for that outcome, by level of care and the type of data reported and room design favoured

239x126mm (96 x 96 DPI)

## Appendix

The data presented in summary tables 2–17 have been condensed substantially from what was reported in the papers. For each table there is one row per paper, detailing the setting and population samples in the study, and the outcomes reported according to whether the data were in favour of a single-room design, a shared-room design, or neither in favour nor against either design. Where statistical analyses were conducted the statistical significance is reported in the tables however no other numerical data is presented. Where no formal analysis was reported only the label pertaining to the outcome data are presented. For example, if the proportion of deaths was lower in the single-room design then “% deaths” is reported in the table under the heading “Data favours single-room design”, or if qualitative analysis of interviews reports that patients would prefer a shared-room design because it is more sociable then “Qualitative (patient preference, social)” is reported in the table under the heading “Data favours shared-room design”.

### List of tables

|                                                                                                                 |    |
|-----------------------------------------------------------------------------------------------------------------|----|
| Table 1. Summary of study quality scores .....                                                                  | 2  |
| Table 2. Summary of studies reporting mortality data .....                                                      | 7  |
| Table 3. Summary of studies reporting data on patient care and disease management .....                         | 9  |
| Table 4. Summary of studies reporting data on maternity and neonatal care .....                                 | 12 |
| Table 5. Summary of studies reporting data on complications of disease .....                                    | 20 |
| Table 6. Summary of studies reporting data on prevention of infection.....                                      | 25 |
| Table 7 Summary of studies reporting data on patient safety .....                                               | 35 |
| Table 8. Summary of studies reporting data on readmissions and reinterventions .....                            | 37 |
| Table 9. Summary of studies reporting views on privacy .....                                                    | 38 |
| Table 10. Summary of studies reporting views on patients' loneliness/isolation and family contact .....         | 44 |
| Table 11. Summary of studies reporting patient's views on noise, disturbance and sleep .....                    | 56 |
| Table 12. Summary of studies reporting patients' views on satisfaction with care.....                           | 63 |
| Table 13. Summary of studies reporting data on patient monitoring and safeguarding.....                         | 75 |
| Table 14. Summary of studies reporting views on patient confidentiality .....                                   | 78 |
| Table 15. Summary of studies reporting data on availability of beds, space requirements, and capital costs..... | 80 |
| Table 16. Summary of studies reporting data on length of stay.....                                              | 83 |
| Table 17. Summary of studies reporting data on costs of care .....                                              | 89 |
| References.....                                                                                                 | 92 |

!



**Key and abbreviations**<sup>a</sup>=adjusted<sup>u</sup>=univariate analysis<sup>m</sup>=multivariate analysisNS=not statistically significant ( $p < 0.05$  is considered statistically significant)

BSI, bloodstream infection; LOS=length of stay; PEMR=physician estimate of mortality risk; SFR=Single family room; SRMC=Single room maternity care

Text is in italics if it is unclear where the true benefit lies, for example where the data is significantly greater for one room type compared to another but the interpretation of benefit may be subjective.

Cells coloured in blue are where a formal comparative statistical analysis was reported.

**Table 1. Summary of study quality scores**

| Citation                                | Study methodology                                                 | QA score |
|-----------------------------------------|-------------------------------------------------------------------|----------|
| Adamson 2003 <sup>1</sup>               | SLR                                                               | 82%      |
| Anåker et al 2017 <sup>2</sup>          | Prospective observational, before and after hospital relocation   | 59%      |
| Anåker et al 2019 <sup>3</sup>          | Qualitative, before and after hospital relocation                 | 90%      |
| Apple 2014 <sup>4</sup>                 | Prospective observational, qualitative                            | 52%      |
| Bevan et al 2016 <sup>5</sup>           | Prospective observational                                         | 59%      |
| Blandfort et al 2019 <sup>6</sup>       | Prospective observational, before and after hospital relocation   | 67%      |
| Blandfort et al 2019 <sup>7</sup>       | Prospective observational, before and after hospital relocation   | 67%      |
| Boardman & Forbes 2011 <sup>8</sup>     | Economic analysis                                                 | 91%      |
| Bocquet et al 2021 <sup>9</sup>         | Retrospective observational, case-control                         | 74%      |
| Bodack et al 2016 <sup>10</sup>         | Prospective observational                                         | 56%      |
| Bonizzoli et al 2011 <sup>11</sup>      | Retrospective observational, before and after hospital relocation | 30%      |
| Boztepe et al 2017 <sup>12</sup>        | Prospective observational                                         | 63%      |
| Bracco et al 2007 <sup>13</sup>         | Prospective observational                                         | 74%      |
| Bradbury-Jones et al 2013 <sup>14</sup> | SLR                                                               | 86%      |
| Campbell-Yeo et al 2021 <sup>15</sup>   | Prospective case-control, before and after hospital relocation    | 74%      |
| Cantoni et al 2009 <sup>16</sup>        | Retrospective observational, before and after hospital relocation | 67%      |
| Carlson et al 2006 <sup>17</sup>        | Prospective observational, before and after hospital relocation   | 33%      |
| Carter et al 2008 <sup>18</sup>         | Prospective observational, before and after hospital relocation   | 33%      |
| Caruso et al 2014 <sup>19</sup>         | Retrospective observational                                       | 74%      |
| Cobo et al 2001 <sup>20</sup>           | Retrospective case-control                                        | 74%      |

|    |                                           |                                                                   |      |
|----|-------------------------------------------|-------------------------------------------------------------------|------|
| 1  | Curtis & Northcott 2017 <sup>21</sup>     | Qualitative, before and after hospital relocation                 | 80%  |
| 2  | Cusack et al 2019 <sup>22</sup>           | Observational before hospital relocation                          | 56%  |
| 3  | Darcy Mahoney et al 2020 <sup>23</sup>    | Prospective observational                                         | 59%  |
| 4  | Darley et al 2018 <sup>24</sup>           | Retrospective observational, before and after hospital relocation | 56%  |
| 5  | Davis et al 2019 <sup>25</sup>            | Retrospective observational, before and after hospital relocation | 67%  |
| 6  | Deitrick et al 2010 <sup>26</sup>         | Qualitative                                                       | 90%  |
| 7  | de Matos et al 2020 <sup>27</sup>         | Prospective observational                                         | 63%  |
| 8  | Domanico et al 2010 <sup>28</sup>         | Prospective observational, before and after hospital relocation   | 63%  |
| 9  | Domanico et al 2011 <sup>29</sup>         | Prospective observational, before and after hospital relocation   | 63%  |
| 10 | Douglas & Douglas 2005 <sup>30</sup>      | Qualitative                                                       | 90%  |
| 11 | Dowdeswell et al 2004 <sup>31</sup>       | SLR                                                               | 36%  |
| 12 | Dowling et al 2012 <sup>32</sup>          | Prospective case-control, before and after hospital relocation    | 63%  |
| 13 | Eberhard-Gran et al 2000 <sup>33</sup>    | Prospective case-control                                          | 59%  |
| 14 | Edéll-Gustafsson et al 2015 <sup>34</sup> | Qualitative                                                       | 90%  |
| 15 | Ehrlander et al 2009 <sup>35</sup>        | Retrospective observational                                       | 78%  |
| 16 | Erdeve et al 2008 <sup>36</sup>           | Prospective case-control                                          | 74%  |
| 17 | Erdeve et al 2009 <sup>37</sup>           | Prospective case-control                                          | 78%  |
| 18 | Erickson et al 2011 <sup>38</sup>         | Prospective observational before and after hospital relocation    | 67%  |
| 19 | Everts et al 1996 <sup>39</sup>           | Prospective observational                                         | 52%  |
| 20 | Felice Tong et al 2018 <sup>40</sup>      | Retrospective case-control                                        | 78%  |
| 21 | Ferri et al 2015 <sup>41</sup>            | Qualitative, before and after hospital relocation                 | 100% |
| 22 | Florey et al 2009 <sup>42</sup>           | Retrospective case-control, before and after hospital relocation  | 44%  |
| 23 | Foo 2022 et al <sup>43</sup>              | Prospective observational                                         | 74%  |
| 24 | Ford-Jones et al 1990 <sup>44</sup>       | Prospective observational                                         | 52%  |
| 25 | Fraenkel et al 2018 <sup>45</sup>         | Retrospective case-control                                        | 67%  |
| 26 | Gregersen et al 2021 <sup>46</sup>        | Retrospective observational, before and after hospital relocation | 70%  |
| 27 | Grundt et al 2021 <sup>47</sup>           | Prospective case-control                                          | 67%  |
| 28 | Halaby et al 2017 <sup>48</sup>           | Retrospective observational, before and after hospital relocation | 48%  |
| 29 | Harris et al 2004 <sup>49</sup>           | Prospective case-control, before and after hospital relocation    | 74%  |
| 30 | Harris et al 2006 <sup>50</sup>           | Retrospective observational                                       | 63%  |
| 31 | Harris et al 2006 <sup>51</sup>           | Retrospective observational                                       | 52%  |
| 32 | Hosseini & Bagheri 2017 <sup>52</sup>     | Prospective observational                                         | 63%  |
| 33 | Hourigan et al 2018 <sup>53</sup>         | Prospective observational, before and after hospital relocation   | 63%  |
| 34 | Hyun et al 2021 <sup>54</sup>             | Retrospective case-control                                        | 78%  |
| 35 | Jansen et al 2021 <sup>55</sup>           | Retrospective observational, before and after hospital relocation | 63%  |

1  
2  
3  
4  
5  
6  
7  
8  
9  
10  
11  
12  
13  
14  
15  
16  
17  
18  
19  
20  
21  
22  
23  
24  
25  
26  
27  
28  
29  
30  
31  
32  
33  
34  
35  
36  
37  
38  
39  
40  
41  
42  
43  
44  
45  
46  
47

|                                                       |                                                                                        |      |
|-------------------------------------------------------|----------------------------------------------------------------------------------------|------|
| Janssen et al 2000 <sup>56</sup>                      | Prospective case-control, before and after hospital relocation                         | 56%  |
| Janssen et al 2006 <sup>57</sup>                      | Prospective observational                                                              | 59%  |
| Jones et al 2016 <sup>58</sup>                        | Qualitative, before and after hospital relocation                                      | 100% |
| Jongerden et al 2013 <sup>59</sup>                    | Prospective observational, before and after hospital relocation                        | 67%  |
| Jou et al 2015 <sup>60</sup>                          | Retrospective case-control                                                             | 74%  |
| Julian et al 2015 <sup>61</sup>                       | Retrospective observational                                                            | 78%  |
| Jung et al 2022 <sup>62</sup>                         | Retrospective observational, before and after hospital relocation                      | 67%  |
| Kainiemi et al 2021 <sup>63</sup>                     | Prospective observational, before and after hospital relocation                        | 59%  |
| Kinnula et al 2008 <sup>64</sup>                      | Prospective observational                                                              | 63%  |
| Kinnula et al 2012 <sup>65</sup>                      | Prospective observational                                                              | 67%  |
| Knight & Singh 2016 <sup>66</sup>                     | Prospective observational                                                              | 59%  |
| Kosuge et al 2013 <sup>67</sup>                       | Prospective observational, before and after hospital relocation                        | 41%  |
| Labarère et al 2004 <sup>68</sup>                     | Prospective observational                                                              | 70%  |
| Lawson & Phiri 2000 <sup>69</sup>                     | Prospective observational, before and after hospital relocation                        | 41%  |
| Lazar et al 2015 <sup>70</sup>                        | Prospective observational, before and after hospital relocation                        | 48%  |
| Lehtonen et al 2020 <sup>71</sup>                     | Prospective observational                                                              | 74%  |
| Lester et al 2014 <sup>72</sup>                       | Prospective observational, before and after hospital relocation                        | 63%  |
| Lester et al 2016 <sup>73</sup>                       | Prospective observational, before and after hospital relocation                        | 59%  |
| Liu et al 2019 <sup>74</sup>                          | Qualitative                                                                            | 100% |
| Lorenz & Dreher 2011 <sup>75</sup>                    | Retrospective case-control                                                             | 78%  |
| Maben et al 2015 <sup>76</sup>                        | Report, before and after hospital relocation with control hospitals                    | 78%  |
| Maben et al 2016 <sup>77</sup>                        | Prospective observational, before and after hospital relocation with control hospitals | 67%  |
| Malcolm 2005 <sup>78</sup>                            | Qualitative                                                                            | 80%  |
| Mattner et al 2007 <sup>79</sup>                      | Prospective observational                                                              | 74%  |
| McDonald et al 2019 <sup>80</sup>                     | Prospective observational, before and after hospital relocation                        | 48%  |
| McKeown et al 2015 <sup>81</sup>                      | Retrospective observational                                                            | 48%  |
| Mental Welfare Commission Scotland 1991 <sup>82</sup> | Report                                                                                 | 30%  |
| Meyer et al 1994 <sup>83</sup>                        | Prospective observational                                                              | 59%  |
| Milford et al 2008 <sup>84</sup>                      | Prospective observational, before and after hospital relocation                        | 30%  |
| Miller et al 1998 <sup>85</sup>                       | Prospective observational                                                              | 59%  |
| Monson et al 2018 <sup>86</sup>                       | Prospective case-control                                                               | 78%  |
| Morgan 2010 <sup>87</sup>                             | Prospective observational                                                              | 44%  |
| Munier-Marion et al 2016 <sup>88</sup>                | Prospective observational                                                              | 74%  |
| Nahas et al 2016 <sup>89</sup>                        | Retrospective observational                                                            | 56%  |

|                                                                 |                                                                       |      |
|-----------------------------------------------------------------|-----------------------------------------------------------------------|------|
| Nash et al 2021 <sup>90</sup>                                   | Prospective observational/ qualitative                                | 63%  |
| Nassery & Landgen 2019 <sup>91</sup>                            | Qualitative                                                           | 90%  |
| OECD & World Health Organization 2019 <sup>92</sup>             | Report                                                                | 14%  |
| Olson & Smith 1992 <sup>93</sup>                                | Prospective observational                                             | 52%  |
| O'Neill et al 2018 <sup>94</sup>                                | Retrospective observational                                           | 74%  |
| Park et al 2020 <sup>95</sup>                                   | Retrospective observational                                           | 63%  |
| Pease & Finlay 2002 <sup>96</sup>                               | Prospective observational                                             | 48%  |
| Persson & Määttä 2012 <sup>97</sup>                             | Qualitative                                                           | 90%  |
| Persson et al 2015 <sup>98</sup>                                | Qualitative                                                           | 90%  |
| Pilmis et al 2020 <sup>99</sup>                                 | Prospective observational                                             | 63%  |
| Pineda et al 2012 <sup>100</sup>                                | Prospective case-control                                              | 70%  |
| Poncette et al 2021 <sup>101</sup>                              | Retrospective observational                                           | 56%  |
| Puumala et al 2020 <sup>102</sup>                               | Retrospective observational, before and after hospital relocation     | 67%  |
| Pyrke et al 2017 <sup>103</sup>                                 | Prospective observational, before and after hospital relocation       | 59%  |
| Quach et al 2018 <sup>104</sup>                                 | Retrospective case-control                                            | 59%  |
| Real et al 2018 <sup>105</sup>                                  | Prospective observational, before and after hospital relocation       | 56%  |
| Reed & Shmid 1986 <sup>106</sup>                                | Narrative report, before and after hospital relocation                | 10%  |
| Reid et al 2015 <sup>107</sup>                                  | Prospective observational, before and after hospital relocation       | 48%  |
| Roos et al 2020 <sup>108</sup>                                  | Qualitative, before and after hospital relocation                     | 90%  |
| Rosbergen et al 2020 <sup>109</sup>                             | Prospective observational, before and after hospital relocation       | 74%  |
| Rowlands & Noble 2008 <sup>110</sup>                            | Qualitative                                                           | 90%  |
| Sadatsafavi et al 2016 <sup>111</sup>                           | Retrospective economic analysis                                       | 100% |
| Sadatsafavi et al 2019 <sup>112</sup>                           | Retrospective economic analysis, before and after hospital relocation | 100% |
| Sakr et al 2021 <sup>113</sup>                                  | Prospective observational                                             | 74%  |
| Schalkers et al 2015 <sup>114</sup>                             | Qualitative                                                           | 100% |
| Scottish Intercollegiate Guidelines Network 2014 <sup>115</sup> | Guideline                                                             | 73%  |
| Singh et al 2015 <sup>116</sup>                                 | Retrospective observational, before and after hospital relocation     | 70%  |
| Singh et al 2016 <sup>117</sup>                                 | Prospective observational                                             | 70%  |
| Søndergaard et al 2022 <sup>118</sup>                           | SLR                                                                   | 91%  |
| Song et al 2018 <sup>119</sup>                                  | Retrospective observational, before and after hospital relocation     | 63%  |
| Stelwagen et al 2021 <sup>120</sup>                             | Qualitative                                                           | 100% |
| Stevens et al 2011 <sup>121</sup>                               | Prospective observational, before and after hospital relocation       | 52%  |
| Stevens et al 2012 <sup>122</sup>                               | Prospective observational, before and after hospital relocation       | 44%  |

|    |                                          |                                                                   |     |
|----|------------------------------------------|-------------------------------------------------------------------|-----|
| 5  | Stevens et al 2014 <sup>123</sup>        | Prospective observational, before and after hospital relocation   | 56% |
| 6  | Stiller et al 2017 <sup>124</sup>        | Retrospective observational                                       | 59% |
| 7  | Swanson et al 2013 <sup>125</sup>        | Prospective observational, before and after hospital relocation   | 37% |
| 8  | Tandberg et al 2018 <sup>126</sup>       | Prospective observational                                         | 70% |
| 9  | Tandberg et al 2019 <sup>127</sup>       | Prospective case-control                                          | 67% |
| 10 | Tandberg et al 2019 <sup>128</sup>       | Prospective observational                                         | 67% |
| 11 | Taylor et al 2018 <sup>129</sup>         | SLR                                                               | 91% |
| 12 | Tegnstedt et al 2013 <sup>130</sup>      | Prospective observational                                         | 70% |
| 13 | Teltsch et al 2011 <sup>131</sup>        | Retrospective case-control, before and after hospital relocation  | 67% |
| 14 | Toivonen et al 2017 <sup>132</sup>       | Prospective case-control, before and after hospital relocation    | 63% |
| 15 | Vaisman et al 2018 <sup>133</sup>        | Retrospective case-control                                        | 67% |
| 16 | van de Glind et al 2008 <sup>134</sup>   | Prospective observational                                         | 74% |
| 17 | van der Hoeven et al 2022 <sup>135</sup> | Retrospective observational, before and after hospital relocation | 63% |
| 18 | Van Enk & Steinberg 2011 <sup>136</sup>  | Prospective observational, before and after hospital relocation   | 44% |
| 19 | van Veenendaal et al 2020 <sup>137</sup> | Retrospective observational, before and after hospital relocation | 70% |
| 20 | Van Veenendaal et al 2022 <sup>138</sup> | Prospective observational                                         | 70% |
| 21 | Vietri et al 2004 <sup>139</sup>         | Prospective case-control, before and after hospital relocation    | 59% |
| 22 | Vohr et al 2017 <sup>140</sup>           | Prospective observational, before and after hospital relocation   | 67% |
| 23 | Voigt et al 2018 <sup>141</sup>          | SLR                                                               | 86% |
| 24 | Walsh et al 2006 <sup>142</sup>          | Prospective observational, before and after hospital relocation   | 33% |
| 25 | Washam et al 2018 <sup>143</sup>         | Retrospective case-control                                        | 78% |
| 26 | Watson et al 2014 <sup>144</sup>         | Prospective observational, before and after hospital relocation   | 44% |
| 27 | Zaal et al 2013 <sup>145</sup>           | Prospective observational                                         | 67% |

Quality is graded by colour: green, good; orange, medium; red, poor. Abbreviation: SLR, systematic literature review.

**Table 2. Summary of studies reporting mortality data**

| Citation                                                    | QA  | Location       | Population      | Number of patients/hospitals                     | Patient type                 | Type of admission | Level of care | Data that favour single room | Data showing no difference                                                                         | Data that favour shared room |
|-------------------------------------------------------------|-----|----------------|-----------------|--------------------------------------------------|------------------------------|-------------------|---------------|------------------------------|----------------------------------------------------------------------------------------------------|------------------------------|
| <b>Before and after a hospital relocation</b>               |     |                |                 |                                                  |                              |                   |               |                              |                                                                                                    |                              |
| Cantoni 2009 <sup>16</sup>                                  | 67% | Switzerland    | Adults          | 227 patients, 1 hospital                         | Stem cell transplant         | Elective          | Routine       |                              | % deaths                                                                                           |                              |
| Davis 2019 <sup>25</sup>                                    | 67% | Australia      | Adults          | 1569 patients, 1 hospital                        | Orthopaedic                  | Elective          | Routine       |                              | $p=0.664$                                                                                          |                              |
| Domanico 2010, <sup>28</sup><br>Domanico 2011 <sup>29</sup> | 63% | United States  | Neonates        | 161 carers, 1 hospital, 2 units                  | Paediatric                   | NR                | NICU          | % deaths                     |                                                                                                    |                              |
| Jansen 2021 <sup>55</sup>                                   | 63% | Netherlands    | Neonates        | 712 patients, 1 hospital, 2 units                | Premature neonates           | Maternity care    | NICU          |                              | $p=0.38$ all-cause mortality<br>$p=0.96$ infection-related mortality                               |                              |
| Jongerden 2013 <sup>59</sup>                                | 67% | Netherlands    | Adults          | 323 patients, 1 hospital                         | Mixed, Adults                | Mixed             | ICU           |                              | $p=0.98$                                                                                           |                              |
| Jung 2022 <sup>62</sup>                                     | 67% | South Korea    | Adults          | 901 patients, 1 hospital                         | Mixed                        | Unclear           | ICU           |                              | $p=0.168$                                                                                          |                              |
| Lazar 2015 <sup>70</sup>                                    | 48% | Israel         | Children        | 4162 patients, 1 hospital                        | Children                     | Mixed             | PICU          |                              | $p=0.22$                                                                                           |                              |
| Puumala 2020 <sup>102</sup>                                 | 67% | United States  | Neonates        | 9995 patients, 1 hospital                        | Premature neonates           | Emergency         | NICU          |                              |                                                                                                    | % deaths                     |
| Singh 2015 <sup>116</sup>                                   | 70% | United Kingdom | Adults, Elderly | 1749 patients, 1 hospital                        | Internal medicine, Geriatric | Mixed             | Routine       |                              | $p=0.12$ one-year mortality<br>$p=0.35$ inpatient mortality<br>$p=0.29$ 30-day discharge mortality |                              |
| <b>Contemporaneous comparison</b>                           |     |                |                 |                                                  |                              |                   |               |                              |                                                                                                    |                              |
| Bracco 2007 <sup>13</sup>                                   | 74% | Canada         | Adults          | 2522 patients (of whom 207 known MRS carriers at | Mixed, Post surgery,         | Mixed             | ICU           | $p<0.001$                    |                                                                                                    |                              |

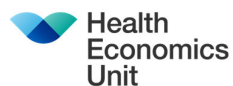

| Citation                    | QA  | Location       | Population   | Number of patients/hospitals      | Patient type               | Type of admission | Level of care | Data that favour single room                     | Data showing no difference                            | Data that favour shared room |
|-----------------------------|-----|----------------|--------------|-----------------------------------|----------------------------|-------------------|---------------|--------------------------------------------------|-------------------------------------------------------|------------------------------|
|                             |     |                |              | admission), 1 hospital, 1 ward    | Medical admission          |                   |               |                                                  |                                                       |                              |
| Caruso 2014 <sup>19</sup>   | 74% | Brazil         | Adults       | 1253 patients, 1 hospital         | Adults                     | Mixed             | ICU           |                                                  | p=0.18                                                |                              |
| Harris 2006 <sup>50</sup>   | 63% | United States  | Neonates     | 21 parents, 75 HCPs, 11 hospitals | Neonates                   | Emergency         | NICU          |                                                  |                                                       | % deaths                     |
| Hyun 2021 <sup>54</sup>     | 78% | South Korea    | Adults       | 666 patients, 1 hospital          | Respiratory, COVID-19      | Emergency         | ICU           |                                                  |                                                       | % deaths                     |
| Julian 2015 <sup>61</sup>   | 78% | United States  | Neonates     | 1823 patients 1 hospital, 1 unit  | Neonates                   | Mixed             | NICU          |                                                  | p=0.56 CLOS or mortality                              |                              |
| Knight 2016 <sup>66</sup>   | 59% | United Kingdom | Elderly      | 100 patients, 2 hospitals         | Geriatric, Dementia        | Mixed             | Routine       |                                                  | p>0.95 inpatient mortality<br>p=0.33 30-day mortality |                              |
| Lehtonen 2020 <sup>71</sup> | 74% | 10 countries   | Neonates     | 4662 patients, 331 units          | Neonates                   | Emergency         | ICU           | OR 0.76, 0.64-0.89, major morbidity or mortality | OR 0.85, 0.70-1.02, mortality only                    |                              |
| Zaal 2013 <sup>145</sup>    | 67% | Netherlands    | Older Adults | 156 patients 1 hospital           | Older Adults with dementia | Mixed             | ICU           |                                                  | p=0.72, % deaths                                      |                              |

**Table 3. Summary of studies reporting data on patient care and disease management**

| Citation                                                                      | QA  | Location       | Population      | Number of patients/<br>hospitals                                         | Patient type                                           | Type of admission      | Level of care | Data that favour<br>single room                                                                                    | Data showing no<br>difference                   | Data that favour<br>shared room                          |
|-------------------------------------------------------------------------------|-----|----------------|-----------------|--------------------------------------------------------------------------|--------------------------------------------------------|------------------------|---------------|--------------------------------------------------------------------------------------------------------------------|-------------------------------------------------|----------------------------------------------------------|
| <b>Before and after a hospital relocation plus Contemporaneous comparison</b> |     |                |                 |                                                                          |                                                        |                        |               |                                                                                                                    |                                                 |                                                          |
| Maben 2016 <sup>77</sup>                                                      | 67% | United Kingdom | Unclear         | 32 patients,<br>21 HCP,<br>1 hospital relocation,<br>2 control hospitals | Mixed                                                  | Unclear                | Mixed         |                                                                                                                    | Medication errors 9<br>months after the<br>move | Fewer medication<br>errors immediately<br>after the move |
| <b>Before and after a hospital relocation</b>                                 |     |                |                 |                                                                          |                                                        |                        |               |                                                                                                                    |                                                 |                                                          |
| Davis 2019 <sup>25</sup>                                                      | 67% | Australia      | Adults          | 1569 patients,<br>1 hospital relocation                                  | Orthopaedic                                            | Elective               | Routine       | Lower % medical<br>deterioration<br>requiring rapid<br>response or clinical<br>review                              |                                                 |                                                          |
| Lawson 2000 <sup>69</sup>                                                     | 41% | United Kingdom | Adults          | 424 patients, 2<br>hospitals, 4 wards<br>relocation                      | Orthopaedic<br>patients                                | Unclear                | Routine       | Lower use of<br>painkillers<br>% responders<br>% verbal outbursts<br>% threatening<br>behaviour                    |                                                 |                                                          |
| <b>Contemporaneous comparison</b>                                             |     |                |                 |                                                                          |                                                        |                        |               |                                                                                                                    |                                                 |                                                          |
| Ehrlander 2009 <sup>35</sup>                                                  | 78% | United States  | Adults          | 117 patients,<br>1 hospital                                              | Mixed                                                  | Unclear                | Routine       |                                                                                                                    |                                                 | Qualitative<br>(feelings of safety)                      |
| McKeown 2015 <sup>81</sup>                                                    | 48% | Ireland        | Unclear         | 880 patients.<br>24 hospitals                                            | End of life                                            | Emergency,<br>Elective | Routine       | Perceived<br>acceptability of<br>patient's death<br>Symptom<br>management<br>Symptom<br>experience<br>Patient care |                                                 |                                                          |
| Nahas 2016 <sup>89</sup>                                                      | 56% | United Kingdom | Adults, Elderly | 60 patients,<br>2 hospitals                                              | Orthopaedic<br>(elective hip/<br>knee<br>arthroplasty) | Elective               | Routine       | p=0.020, cleanliness<br>p=0.015, staff pain<br>management                                                          | p=0.190, toileting<br>help given                |                                                          |



| Citation                         | QA            | Location      | Population | Number of patients/<br>hospitals | Patient type        | Type of<br>admission | Level of care | Data that favour<br>single room                                                                                                                                                                                                | Data showing no<br>difference                                                               | Data that favour<br>shared room |
|----------------------------------|---------------|---------------|------------|----------------------------------|---------------------|----------------------|---------------|--------------------------------------------------------------------------------------------------------------------------------------------------------------------------------------------------------------------------------|---------------------------------------------------------------------------------------------|---------------------------------|
|                                  |               |               |            |                                  |                     |                      |               | p<0.001, pain control                                                                                                                                                                                                          |                                                                                             |                                 |
| Van de Glind 2008 <sup>134</sup> | 74%           | Netherlands   | Adults     | 52 encounters, 1 hospital        | Urology             | Unclear              | Routine       | p=0.003, greater duration of physician-patient encounter<br>% encounter time patient speaks is greater<br>Patients disclose more emotional cues, and information cues<br>p=0.031, more physician responses to the patient cues | % encounter time physician speaks was no different<br>Patients disclose more emotional cues |                                 |
| <b>Evidence synthesis</b>        |               |               |            |                                  |                     |                      |               |                                                                                                                                                                                                                                |                                                                                             |                                 |
| Dowdeswell 2004 <sup>31</sup>    | SLR<br>36%    | International | Unclear    | Unclear                          | Mixed               | Mixed                | Mixed         | Hospital acquired infection treatment;<br>Hand-hygiene;<br>Cleaning and decontamination;<br>Recovery;<br>In situ medical treatment<br>Family involvement<br>Environment match the patient's progress                           |                                                                                             |                                 |
| OECD WHO 2019 <sup>92</sup>      | Report<br>14% | Europe        | NR         | NR                               | Mixed               | Mixed                | Mixed         |                                                                                                                                                                                                                                | Pain scores                                                                                 |                                 |
| Søndergaard 2022 <sup>118</sup>  | SLR<br>91%    | International | NR         | NR                               | Acute,<br>Surgical, | Unclear              | Routine       | Sleep quality<br>Personal control<br>Environment                                                                                                                                                                               |                                                                                             |                                 |

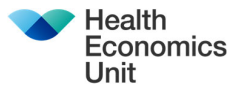

| Citation                   | QA         | Location      | Population | Number of patients/<br>hospitals | Patient type         | Type of admission | Level of care | Data that favour<br>single room | Data showing no<br>difference  | Data that favour<br>shared room |
|----------------------------|------------|---------------|------------|----------------------------------|----------------------|-------------------|---------------|---------------------------------|--------------------------------|---------------------------------|
|                            |            |               |            |                                  | Internal<br>medicine |                   |               | Recovery time                   |                                |                                 |
| Taylor 2018 <sup>129</sup> | SLR<br>91% | International | NR         | NR                               | Mixed                | Mixed             | Mixed         |                                 |                                | Restraint use e.g.,<br>rails    |
| Voigt 2018 <sup>141</sup>  | SLR<br>86% | International | NR         | NR                               | NR                   | Unclear           | Routine       |                                 | Medication errors<br>and usage |                                 |

For peer review only

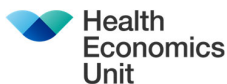

Table 4. Summary of studies reporting data on maternity and neonatal care

| Citation                                      | QA  | Location      | Population | Number of patients/hospitals                                  | Patient type | Type of admission | Level of care | Data that favour single room                                                                                                                                                                                                                                                                                                                | Data showing no difference                                                                                                                                                                                                                                                                   | Data that favour shared room |
|-----------------------------------------------|-----|---------------|------------|---------------------------------------------------------------|--------------|-------------------|---------------|---------------------------------------------------------------------------------------------------------------------------------------------------------------------------------------------------------------------------------------------------------------------------------------------------------------------------------------------|----------------------------------------------------------------------------------------------------------------------------------------------------------------------------------------------------------------------------------------------------------------------------------------------|------------------------------|
| <b>Before and after a hospital relocation</b> |     |               |            |                                                               |              |                   |               |                                                                                                                                                                                                                                                                                                                                             |                                                                                                                                                                                                                                                                                              |                              |
| Campbell-Yeo 2021 <sup>15</sup>               | 74% | Canada        | Neonates   | 71 mothers, 2 wards                                           | Neonates     | Emergency         | ICU           | Parental presence and involvement (mother and partner feeding)                                                                                                                                                                                                                                                                              |                                                                                                                                                                                                                                                                                              |                              |
| Carter 2008 <sup>18</sup>                     | 33% | United States | Adults     | 1 hospital 53 parents                                         | Neonates     | Emergency         | ICU           | All p's<0.05 parent perceptions of access to staff                                                                                                                                                                                                                                                                                          |                                                                                                                                                                                                                                                                                              |                              |
| Domanico 2011 <sup>29</sup>                   | 63% | United States | Neonates   | 162 patients (PEMRs 2/3=150, PEMRs 4=12), 1 hospital, 2 units | Paediatric   | NR                | NICU          | PEMR 2-3: patient progress: p<0.001, total apnoea events p<0.001, apnoea events/day p=0.031, days on mother's breastmilk; p=0.001, days on mother's breastmilk per LOS; p=0.003, interval to enteral feeding; p<0.001, interval to breastmilk feeding; p=0.048, days on parenteral nutrition; p=0.004, days on parenteral nutrition per LOS | PEMR 2-3 p=0.94, gestational age p=0.92, admission weight p=NS, acuity p=0.45, weight gain p=0.17, length gain p=0.17, head circumference gain p=0.84, total CPAP days p=0.7, CPAP days/LOS p=0.17, total caffeine days p=0.11, total caffeine days/LOS p=0.765, interval to formula feeding | PEMR 4:                      |

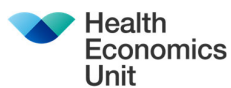

1  
2  
3  
4  
5  
6  
7  
8  
9  
10  
11  
12  
13  
14  
15  
16  
17  
18  
19  
20  
21  
22  
23  
24  
25  
26  
27  
28  
29  
30  
31  
32  
33  
34  
35  
36  
37  
38  
39  
40  
41  
42  
43  
44  
45  
46  
47

| Citation | QA | Location | Population | Number of patients/hospitals | Patient type | Type of admission | Level of care | Data that favour single room | Data showing no difference                                                                                                                                                                                                                                                                                                                                                                                                                                                                                                                                                                                                                                                                                                                                                                                                                                        | Data that favour shared room |
|----------|----|----------|------------|------------------------------|--------------|-------------------|---------------|------------------------------|-------------------------------------------------------------------------------------------------------------------------------------------------------------------------------------------------------------------------------------------------------------------------------------------------------------------------------------------------------------------------------------------------------------------------------------------------------------------------------------------------------------------------------------------------------------------------------------------------------------------------------------------------------------------------------------------------------------------------------------------------------------------------------------------------------------------------------------------------------------------|------------------------------|
|          |    |          |            |                              |              |                   |               |                              | <p>p=0.47, gestational age<br/>                     p=0.49, admission weight<br/>                     p=NS, acuity<br/>                     p=0.76, weight gain<br/>                     p=0.47, length gain<br/>                     p=0.70, head circumference gain<br/>                     p=0.59, total CPAP days<br/>                     p=0.94, CPAP days/LOS<br/>                     p=0.82, total caffeine days<br/>                     p=0.94, total caffeine days/LOS<br/>                     p=0.70, total apnoea events<br/>                     p=0.18, apnoea events/day<br/>                     p=0.937, interval to enteral feeding<br/>                     p=0.571, interval to formula feeding<br/>                     p=0.818, days on parenteral nutrition<br/>                     p=0.937, days on parenteral nutrition per LOS</p> |                              |

For peer review only

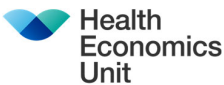

| Citation                    | QA  | Location      | Population | Number of patients/hospitals                  | Patient type     | Type of admission | Level of care | Data that favour single room                                                                                       | Data showing no difference                                                                                                                           | Data that favour shared room                             |
|-----------------------------|-----|---------------|------------|-----------------------------------------------|------------------|-------------------|---------------|--------------------------------------------------------------------------------------------------------------------|------------------------------------------------------------------------------------------------------------------------------------------------------|----------------------------------------------------------|
| Dowling 2012 <sup>32</sup>  | 63% | United States | Neonates   | 40 mothers, 1 hospital                        | Neonates         | Emergency         | ICU           |                                                                                                                    | p=NS., all breastfeeding measures                                                                                                                    |                                                          |
| Erickson 2011 <sup>38</sup> | 67% | United States | Neonates   | 73 patients, 1 hospital                       | Preterm neonates | Emergency         | NICU          | p=0.04, time to enteral nutrition                                                                                  | p=0.05, weight gain/day<br>p=0.30, weight gain/day normalized to kg birth weight<br>p=0.47, time to parenteral nutrition                             |                                                          |
| Harris 2004 <sup>49</sup>   | 74% | Canada        | Adults     | 976 patients, 1 new hospital unit established | Pregnant women   | Maternity         | Routine       | p=0.04, continuous or intermittent electronic foetal monitoring<br>p=0.03, IV therapy<br>p=0.01, 1-minute Apgar <7 | p=NS for augmentation of labour, 20-minutes initial electronic foetal monitoring at admission, epidural, narcotics, mode of delivery, and episiotomy |                                                          |
| Hourigan 2018 <sup>53</sup> | 63% | United States | Neonates   | 32 patients, 1 hospital                       | Neonates         | Emergency         | ICU           |                                                                                                                    | p=0.30, receiving some maternal or donor breastmilk                                                                                                  | p=0.04, primarily receiving maternal or donor breastmilk |
| Janssen 2000 <sup>56</sup>  | 56% | Canada        | Adults     | 426 patients, 1 hospital relocation           | Pregnant women   | Maternity         | Routine       | p<0.001, patient satisfaction with amount of nurse interaction for physical, emotional, and                        | p=0.10, baby received supplementation with water<br>p=0.25, p=0.05 clear discharge instructions of                                                   |                                                          |

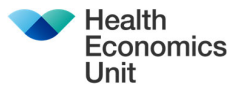

1  
2  
3  
4  
5  
6  
7  
8  
9  
10  
11  
12  
13  
14  
15  
16  
17  
18  
19  
20  
21  
22  
23  
24  
25  
26  
27  
28  
29  
30  
31  
32  
33  
34  
35  
36  
37  
38  
39  
40  
41  
42  
43  
44  
45  
46  
47

| Citation | QA | Location | Population | Number of patients/hospitals | Patient type | Type of admission | Level of care | Data that favour single room                                                                                                                                                                                                                                                                                                                                                                                                                                                                           | Data showing no difference                                            | Data that favour shared room |
|----------|----|----------|------------|------------------------------|--------------|-------------------|---------------|--------------------------------------------------------------------------------------------------------------------------------------------------------------------------------------------------------------------------------------------------------------------------------------------------------------------------------------------------------------------------------------------------------------------------------------------------------------------------------------------------------|-----------------------------------------------------------------------|------------------------------|
|          |    |          |            |                              |              |                   |               | spiritual needs, in labour, and postpartum p<0.001, patient satisfaction with nurse response time, teaching time, information received, feeding related teaching p<0.001, number of babies who received supplementation with formula p<0.001, number breastfeeding p=0.044, number breastfed within 1-2 hours post-delivery p=0.01, clear discharge instructions of when expect a call from the community health nurse p<0.001, clear instructions of how to use car seat, and nurse reviewed handouts | when to call the doctor, and when to make an appointment respectively |                              |

For peer review only

| Citation                    | QA  | Location      | Population             | Number of patients/hospitals                                           | Patient type   | Type of admission | Level of care | Data that favour single room                                                                                                                                                   | Data showing no difference                                                                                                                                                                                              | Data that favour shared room              |
|-----------------------------|-----|---------------|------------------------|------------------------------------------------------------------------|----------------|-------------------|---------------|--------------------------------------------------------------------------------------------------------------------------------------------------------------------------------|-------------------------------------------------------------------------------------------------------------------------------------------------------------------------------------------------------------------------|-------------------------------------------|
| Lester 2014 <sup>72</sup>   | 63% | United States | Neonates               | 403 patients, 1 hospital relocation                                    | Neonates       | Emergency         | ICU           | Narrative - reduced stress<br><br>$p < 0.0001$ , reduced pain                                                                                                                  |                                                                                                                                                                                                                         |                                           |
| Puumala 2020 <sup>102</sup> | 67% | United States | Neonates               | 9995 patients, 1 hospital                                              | Neonates       | Emergency         | ICU           | $p < 0.001$ , interval to oral feeding                                                                                                                                         |                                                                                                                                                                                                                         |                                           |
| Olson 1992 <sup>93</sup>    | 52% | United States | Adults                 | 351 patients, 28 HCP, 1 hospital                                       | Pregnant women | Maternity         | Routine       | $p < 0.05$ , nurse preferred single rooms<br><br>$p < 0.01$ , nurse think single room is better for premature neonates                                                         | $p > 0.05$ , nurses think open rooms are better for ventilated/critically ill infant                                                                                                                                    |                                           |
| Stevens 2012 <sup>122</sup> | 44% | United States | Neonates               | 73 patients, 1 hospital relocation                                     | Neonates       | Emergency         | ICU           | $p = 0.04$ , interval to enteric nutrition                                                                                                                                     | $p = \text{NS.}$ , other nutrition parameters                                                                                                                                                                           |                                           |
| Swanson 2013 <sup>125</sup> | 37% | United States | Neonates, Carers, HCPs | 55 parent surveys, 42 AP surveys, 151 NN surveys 1 hospital relocation | Neonates       | Emergency         | NICU          | $p < 0.05$ , Advanced neonatal practitioner perceptions of development, facility and privacy<br>$p < 0.05$ , Neonatal nurses perceptions of development, facility and privacy. | Advanced neonatal practitioners:<br>$p = \text{NS.}$ , teamwork, communication, safety<br><br>Neonatal nurses:<br>$p = \text{NS.}$ , communication, safety<br><br>Parents:<br>$p = \text{NS.}$ , development and safety | Neonatal nurses:<br>$p < 0.05$ , teamwork |

| Citation                           | QA  | Location    | Population       | Number of patients/hospitals                  | Patient type       | Type of admission | Level of care | Data that favour single room                                                                           | Data showing no difference                                                                                                                                                                     | Data that favour shared room                                                                    |
|------------------------------------|-----|-------------|------------------|-----------------------------------------------|--------------------|-------------------|---------------|--------------------------------------------------------------------------------------------------------|------------------------------------------------------------------------------------------------------------------------------------------------------------------------------------------------|-------------------------------------------------------------------------------------------------|
| Toivonen 2017 <sup>132</sup>       | 63% | Finland     | Neonates         | 20 nurses, 1 hospital relocation              | Neonates           | Emergency         | ICU           | p=0.001, duration of nurse-parent interactions<br>p<0.0001, duration of nurse-family interactions      | p=0.349, number of nurse-parent interactions<br>p=0.471, number of nurse-infant interactions<br>p=0.073, duration of nurse-infant interactions<br>p=0.488, number of nurse-family interactions |                                                                                                 |
| Van der Hoeven 2022 <sup>135</sup> | 63% | Netherlands | Infants          | 1293 infants, 1 hospital                      | Infants            | Unclear           | ICU           | p<0.001, weight at discharge<br>p=0.003, rate of weight gain                                           | p=0.13, gestational age at full enteral feeding                                                                                                                                                |                                                                                                 |
| Contemporaneous comparison         |     |             |                  |                                               |                    |                   |               |                                                                                                        |                                                                                                                                                                                                |                                                                                                 |
| Bodack 2016 <sup>10</sup>          | 55% | Germany     | Neonates         | 35 sets of parents                            | Premature neonates | Maternity care    | NICU          | Qualitative (quality of care)                                                                          | Qualitative (communication)                                                                                                                                                                    |                                                                                                 |
| Erdeve 2008 <sup>36</sup>          | 74% | Turkey      | Adults, Neonates | 60 infants, 49 mothers, 1 hospital            | Preterm neonates   | Emergency         | NICU          |                                                                                                        | p=0.084, Routine visits<br>p=0.046, acute care visits<br>p=0.154, number of breastfed infants                                                                                                  | p=0.005, more total applications to health services<br><br>p=0.001, more consultations by phone |
| Grundt 2021 <sup>47</sup>          | 67% | Norway      | Neonates         | 77 patients, 66 mothers, 2 hospitals, 2 units | Premature neonates | Maternity         | NICU          | p=0.08, p=0.06, volume breastmilk produced 7, 14, days post-delivery, respectively<br>p<0.001, p=0.02, | p=0.71, number of sessions at the breast<br>p=0.46, mother breastfeeding self-efficacy<br>p=0.51, p=0.33,                                                                                      |                                                                                                 |



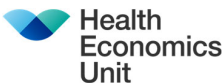

| Citation                      | QA   | Location      | Population | Number of patients/hospitals | Patient type       | Type of admission | Level of care | Data that favour single room                                                                                                                                                                                                                                 | Data showing no difference                                                                                                                                                                                     | Data that favour shared room     |
|-------------------------------|------|---------------|------------|------------------------------|--------------------|-------------------|---------------|--------------------------------------------------------------------------------------------------------------------------------------------------------------------------------------------------------------------------------------------------------------|----------------------------------------------------------------------------------------------------------------------------------------------------------------------------------------------------------------|----------------------------------|
|                               |      |               |            |                              |                    |                   |               | infants breastfed directly and exclusively at discharge, at term, respectively $p < 0.001$ , $p = 0.003$ , $p = 0.00$ , infants partly directly breastfed at discharge, at term, and 4 months corrected age, respectively $p = 0.00^a$ use of nipple shields | infants exclusively directly breastfed, or on solids, at 4 months corrected age, respectively $p = 0.33$ , $p = 0.61$ , use of nipple shields adjusted for post-menstrual age 33 weeks, 34 weeks, respectively |                                  |
| Lester 2014 <sup>72</sup>     | 63%  | United States | Neonates   | 403 patients, 1 hospital     | Neonates           | Emergency         | ICU           | $p = 0.005$ , weight at discharge $p = 0.017$ , rate of weight gain $p = 0.015$ , interval to full enteral feeding                                                                                                                                           |                                                                                                                                                                                                                |                                  |
| Pineda 2012 <sup>100</sup>    | 70%  | United States | Neonates   | 81 patients, 1 hospital      | Premature neonates | Emergency         | NICU          |                                                                                                                                                                                                                                                              | $p = 0.75$ , breastmilk feeding at discharge                                                                                                                                                                   |                                  |
| Stelwagen 2021 <sup>120</sup> | 100% | Netherlands   | Adults     | 1 hospital<br>36 parents     | Neonates           | Emergency         | ICU           | Narrative - apnoea and periodic breathing                                                                                                                                                                                                                    |                                                                                                                                                                                                                |                                  |
| Tandberg 2019 <sup>128</sup>  | 67%  | Norway        | Neonates   | 77 patients, 2 hospitals     | Neonates           | Emergency         | ICU           | Greater birth weight, length, and head circumference                                                                                                                                                                                                         | $p = 0.45$ , $p = 0.42$ , breastmilk feeding exclusively at discharge, and term +4 months                                                                                                                      | Greater weight at term +4 months |



| Citation                 | QA  | Location      | Population | Number of patients/hospitals        | Patient type | Type of admission | Level of care | Data that favour single room                                                                                                                                                             | Data showing no difference | Data that favour shared room     |
|--------------------------|-----|---------------|------------|-------------------------------------|--------------|-------------------|---------------|------------------------------------------------------------------------------------------------------------------------------------------------------------------------------------------|----------------------------|----------------------------------|
|                          |     |               |            |                                     |              |                   |               |                                                                                                                                                                                          |                            | greater length at term +4 months |
| Vohr 2017 <sup>140</sup> | 67% | United States | Neonates   | 651 patients, 1 hospital relocation | Neonates     | Emergency         | NICU          | $p < 0.001$ , weight gain per day<br>$p < 0.001$ , weight gain at discharge<br>$p = 0.002$ , human milk at 1 week<br>$p = 0.001$ , human milk at 4 weeks<br>$p < 0.001$ , volume of milk |                            |                                  |

For peer review only

**Table 5. Summary of studies reporting data on complications of disease**

| Citation                                                                      | QA  | Location       | Population      | Number of patients/hospitals                                    | Patient type         | Type of admission | Level of care | Data that favour single room                                                                                                                                   | Data showing no difference                                                                                   | Data that favour shared room                                                                                                                                       |
|-------------------------------------------------------------------------------|-----|----------------|-----------------|-----------------------------------------------------------------|----------------------|-------------------|---------------|----------------------------------------------------------------------------------------------------------------------------------------------------------------|--------------------------------------------------------------------------------------------------------------|--------------------------------------------------------------------------------------------------------------------------------------------------------------------|
| <b>Before and after a hospital relocation plus Contemporaneous comparison</b> |     |                |                 |                                                                 |                      |                   |               |                                                                                                                                                                |                                                                                                              |                                                                                                                                                                    |
| Maben 2016 <sup>77</sup>                                                      | 67% | United Kingdom | Unclear         | 32 patients, 21 HCP, 1 hospital relocation, 2 control hospitals | Mixed                | Unclear           | Mixed         |                                                                                                                                                                |                                                                                                              | Pressure ulcers per 1,000 patient-days                                                                                                                             |
| <b>Before and after a hospital relocation</b>                                 |     |                |                 |                                                                 |                      |                   |               |                                                                                                                                                                |                                                                                                              |                                                                                                                                                                    |
| Blandfort 2019 <sup>7</sup>                                                   | 67% | Denmark        | Adults, Elderly | 1014 patients, 2 hospitals                                      | Geriatric, Dementia  | Elective          | Routine       | p=0.02, incidence of delirium                                                                                                                                  | p=0.57, duration of first episode of delirium                                                                |                                                                                                                                                                    |
| Cantoni 2009 <sup>16</sup>                                                    | 67% | Switzerland    | Adults          | 227 patients, 1 hospital                                        | Stem cell transplant | Elective          | Routine       | Number of patients with infections (total, pneumonia, CMV-reactivation, CMV-primary, invasive mould, other)<br>Infection rates (pneumonia: clinical diagnosis) |                                                                                                              | Number of patients with infections (microbiologically documented, primary sepsis)<br><br>Infection rates (sepsis, pneumonia, pneumonia: microbiological diagnosis) |
| Davis 2019 <sup>25</sup>                                                      | 67% | Australia      | Adults          | 1569 patients, 1 hospital relocation                            | Orthopaedic          | Elective          | Routine       |                                                                                                                                                                | p=0.243, hospital-acquired pressure injuries                                                                 |                                                                                                                                                                    |
| Harris 2004 <sup>49</sup>                                                     | 74% | Canada         | Adults          | 976 patients, 1 new hospital unit established                   | Pregnant women       | Maternity         | Routine       |                                                                                                                                                                | p=NS for rates of postpartum haemorrhage, pyrexia, rates of thick meconium, and cases of meconium aspiration |                                                                                                                                                                    |

| Citation                    | QA  | Location       | Population      | Number of patients/hospitals         | Patient type                 | Type of admission | Level of care | Data that favour single room                                                                                                                                                                                                                   | Data showing no difference                                                                                                                | Data that favour shared room                                                      |
|-----------------------------|-----|----------------|-----------------|--------------------------------------|------------------------------|-------------------|---------------|------------------------------------------------------------------------------------------------------------------------------------------------------------------------------------------------------------------------------------------------|-------------------------------------------------------------------------------------------------------------------------------------------|-----------------------------------------------------------------------------------|
| Lester 2014 <sup>72</sup>   | 63% | United States  | Neonates        | 403 patients, 1 hospital relocation  | Neonates                     | Emergency         | ICU           | Less stress (some related to increased maternal involvement) p<0.0001, maternal involvement related to lower pain scores p<0.0001, increased maternal involvement in care of the neonate p<0.0001, reduction in pain due to the SFR NICU alone |                                                                                                                                           |                                                                                   |
| Singh 2015 <sup>116</sup>   | 70% | United Kingdom | Adults, Elderly | 1749 patients, 1 hospital relocation | Internal medicine, Geriatric | Mixed             | Routine       |                                                                                                                                                                                                                                                |                                                                                                                                           | p<0.01, hip fractures due to falls                                                |
| Stevens 2012 <sup>122</sup> | 44% | United States  | Neonates        | 73 patients, 1 hospital relocation   | Neonates                     | Emergency         | ICU           |                                                                                                                                                                                                                                                | OR 1.267, 0.929-1.730, serious adverse outcomes                                                                                           |                                                                                   |
| Lester 2016 <sup>73</sup>   | 59% | United States  | Neonates        | 216 patients, 1 hospital relocation  | Premature neonates           | Maternity         | ICU           |                                                                                                                                                                                                                                                | p=0.90, periventricular leukomalacia p=0.80, retinopathy of prematurity (stage 3, 4, 5) p=0.16, sepsis p=0.13, bronchopulmonary dysplasia | p=0.09, necrotising enterocolitis p=0.08, intraventricular haemorrhage (grade3/4) |
| Monson 2018 <sup>86</sup>   | 78% | United States  | Neonates        | 90 preterm infants, 15 term-         | Preterm neonates             | Emergency         | NICU          |                                                                                                                                                                                                                                                | p=0.35, bronchopulmonary dysplasia                                                                                                        |                                                                                   |



1  
2  
3  
4  
5  
6  
7  
8  
9  
10  
11  
12  
13  
14  
15  
16  
17  
18  
19  
20  
21  
22  
23  
24  
25  
26  
27  
28  
29  
30  
31  
32  
33  
34  
35  
36  
37  
38  
39  
40  
41  
42  
43  
44  
45  
46  
47

| Citation                                                | QA  | Location  | Population       | Number of patients/hospitals                                                     | Patient type                           | Type of admission | Level of care | Data that favour single room                                                               | Data showing no difference                                                                                                          | Data that favour shared room |
|---------------------------------------------------------|-----|-----------|------------------|----------------------------------------------------------------------------------|----------------------------------------|-------------------|---------------|--------------------------------------------------------------------------------------------|-------------------------------------------------------------------------------------------------------------------------------------|------------------------------|
|                                                         |     |           |                  | born control infants, 1 hospital                                                 |                                        |                   |               |                                                                                            | p=0.38, infection                                                                                                                   |                              |
| <b>Contemporaneous comparison</b>                       |     |           |                  |                                                                                  |                                        |                   |               |                                                                                            |                                                                                                                                     |                              |
| Bracco 2007 <sup>13</sup>                               | 74% | Canada    | Adults           | 2522 patients (of whom 207 known MRSA carriers at admission), 1 hospital, 1 ward | Mixed, Post surgery, Medical admission | Mixed             | ICU           | Organ failure                                                                              |                                                                                                                                     |                              |
| Caruso 2014 <sup>19</sup>                               | 74% | Brazil    | Adults           | 1253 patients, 1 hospital                                                        | Adults                                 | Mixed             | ICU           | p<0.01 delirium prevalence<br>p<0.01 medical admissions<br>p<0.01 postoperative admissions | p=0.33 number of days with delirium                                                                                                 |                              |
| Erdeve 2008, <sup>36</sup><br>Erdeve 2009 <sup>37</sup> | 74% | Turkey    | Adults, Neonates | 60 infants, 49 mothers, 1 hospital                                               | Preterm neonates                       | Emergency         | NICU          |                                                                                            | p=0.720 clinical risk index for babies<br>p=0.673 neonatal therapeutic intensity scoring system                                     |                              |
| Felice Tong 2018 <sup>40</sup>                          | 78% | Australia | Adults           | 185 patients, 1 hospital                                                         | Orthopaedic                            | Elective          | Routine       |                                                                                            | p=0.70 thromboembolic events within 30-days<br>p=0.21 superficial wound infection within 30-days<br>Deep wound infections<br>p=0.70 |                              |



| Citation                    | QA  | Location                                                                                  | Population | Number of patients/hospitals        | Patient type        | Type of admission | Level of care | Data that favour single room                                                                                                                                                     | Data showing no difference                                                                                                                                                                                                                                                                  | Data that favour shared room                                             |
|-----------------------------|-----|-------------------------------------------------------------------------------------------|------------|-------------------------------------|---------------------|-------------------|---------------|----------------------------------------------------------------------------------------------------------------------------------------------------------------------------------|---------------------------------------------------------------------------------------------------------------------------------------------------------------------------------------------------------------------------------------------------------------------------------------------|--------------------------------------------------------------------------|
|                             |     |                                                                                           |            |                                     |                     |                   |               |                                                                                                                                                                                  | medical complications within 30-days                                                                                                                                                                                                                                                        |                                                                          |
| Knight 2016 <sup>66</sup>   | 59% | United Kingdom                                                                            | Elderly    | 100 patients, 2 hospitals           | Geriatric, Dementia | Mixed             | Routine       |                                                                                                                                                                                  | $p > 0.95$ , patients with hip fracture as result of inpatient fall                                                                                                                                                                                                                         |                                                                          |
| Lehtonen 2020 <sup>71</sup> | 74% | Canada, Australia, New Zealand, Finland, Israel, Japan, Spain, Sweden, Switzerland, Italy | Neonates   | 4662 patients, 331 units            | Preterm neonates    | Emergency         | ICU           | OR 0.76, 0.64-0.89, death or any major morbidity                                                                                                                                 | OR 0.95, 0.84-1.08, composite of mortality or any morbidity<br>OR 0.84, 0.71-1.00, sepsis<br>OR 1.10, 0.95-1.27, Broncho-pulmonary dysplasia<br>OR 1.14, 0.95-1.37, Intraventricular haemorrhage / Periventricular leukomalacia<br>OR 0.81, 0.66-0.99, Retinopathy of prematurity treatment |                                                                          |
| Vohr 2017 <sup>140</sup>    | 67% | United States                                                                             | Neonates   | 651 patients, 1 hospital relocation | Neonates            | Emergency         | NICU          | Bayley composites:<br>$p=0.02$ Cognitive<br>$p=0.04$ Language<br>$p=0.006$ Expressive communication<br>$p=0.08$ Motor<br>$p=0.04$ Fine motor<br><br>Bayley III composite scores: | Bayley composites:<br>$p=0.14$ receptive communication<br>$p=0.67$ gross motor<br>$p=0.11$ normal neurologic examination                                                                                                                                                                    | Suspicious neurological examination<br>Abnormal neurological examination |



| Citation                                                        | QA         | Location       | Population   | Number of patients/hospitals | Patient type               | Type of admission | Level of care | Data that favour single room                           | Data showing no difference     | Data that favour shared room |
|-----------------------------------------------------------------|------------|----------------|--------------|------------------------------|----------------------------|-------------------|---------------|--------------------------------------------------------|--------------------------------|------------------------------|
|                                                                 |            |                |              |                              |                            |                   |               | p=0.05, cognitive<br>p=0.02, language<br>p=0.07, motor |                                |                              |
| Lester 2014 <sup>72</sup>                                       | 63%        | United States  | Neonates     | 403 patients, 1 hospital     | Neonates                   | Emergency         | ICU           | p=0.05, sepsis                                         |                                |                              |
| Zaal 2013 <sup>145</sup>                                        | 67%        | Netherlands    | Older Adults | 156 patients<br>1 hospital   | Older Adults with dementia | Mixed             | ICU           |                                                        | p=0.53, crude risk of delirium |                              |
| <b>Evidence synthesis</b>                                       |            |                |              |                              |                            |                   |               |                                                        |                                |                              |
| OECD WHO 2019 <sup>92</sup>                                     | Report 14% | Europe         | NR           | NR                           | Mixed                      | Mixed             | Mixed         | p<0.05<br>Reduced medical errors                       |                                |                              |
| Scottish Intercollegiate Guidelines Network 2019 <sup>115</sup> | Report 73% | United Kingdom | Adults       | NR                           | At risk for delirium       | NR                | Routine       | Managing patients with delirium                        |                                |                              |
| Taylor 2018 <sup>129</sup>                                      | SLR 91%    | International  | NR           | NR                           | Mixed                      | Mixed             | Mixed         | ICU delirium                                           |                                |                              |

**Table 6. Summary of studies reporting data on prevention of infection**

| Citation                                                                      | QA  | Location       | Population | Number of patients/hospitals                                    | Patient type | Type of admission | Level of care | Data that favour single room                                                                                                                                                                                                    | Data showing no difference                                                               | Data that favour shared room                                                                  |
|-------------------------------------------------------------------------------|-----|----------------|------------|-----------------------------------------------------------------|--------------|-------------------|---------------|---------------------------------------------------------------------------------------------------------------------------------------------------------------------------------------------------------------------------------|------------------------------------------------------------------------------------------|-----------------------------------------------------------------------------------------------|
| <b>Before and after a hospital relocation plus Contemporaneous comparison</b> |     |                |            |                                                                 |              |                   |               |                                                                                                                                                                                                                                 |                                                                                          |                                                                                               |
| Maben 2016 <sup>77</sup>                                                      | 67% | United Kingdom | Unclear    | 32 patients, 21 HCP, 1 hospital relocation, 2 control hospitals | Mixed        | Unclear           | Mixed         | <i>Clostridium difficile</i> in older people's ward (Control new-build hospital)                                                                                                                                                |                                                                                          | <i>Clostridium difficile</i> in older people's ward (Study hospital)                          |
| <b>Before and after a hospital relocation</b>                                 |     |                |            |                                                                 |              |                   |               |                                                                                                                                                                                                                                 |                                                                                          |                                                                                               |
| Bonizzoli 2011 <sup>11</sup>                                                  | 30% | Italy          | Unclear    | 818 patients, 1 unit                                            | Trauma       | Unclear           | ICU           | Isolates of MRSA, <i>Proteus mirabilis</i> , <i>Escherichia coli</i> , <i>Serratia marcescens</i> , and <i>Enterobacter</i> spp<br>p<0.01, amoxicillin/clavulanate use, ceftriaxone use<br>p<0.05 oxacillin use, vancomycin use |                                                                                          |                                                                                               |
| Darley 2018 <sup>24</sup>                                                     | 56% | United Kingdom | Unclear    | 1 hospital relocation                                           | Unclear      | Unclear           | Routine       | p=0.04, <i>Escherichia coli</i> bacteraemia<br>p=0.01, hospital-acquired <i>Clostridium difficile</i> infection                                                                                                                 | p=0.22, hospital acquired methicillin-sensitive <i>Staphylococcus aureus</i> bacteraemia |                                                                                               |
| Domanico 2011 <sup>29</sup>                                                   | 63% | United States  | Neonates   | 162 patients (PEMRs 2/3=150, PEMRs 4=12), 1 hospital, 2 units   | Paediatric   | NR                | NICU          | Incidence of nosocomial sepsis ( <i>Candida albicans</i> , CONS, <i>Enterococcus</i>                                                                                                                                            | Incidence of nosocomial sepsis ( <i>Escherichia coli</i> )                               | Incidence of nosocomial sepsis ( <i>Enterobacter cloacae</i> , <i>Klebsiella pneumoniae</i> ) |



| Citation                     | QA   | Location    | Population | Number of patients/hospitals                                                                                                         | Patient type | Type of admission | Level of care | Data that favour single room                                                                                                                                  | Data showing no difference                                                                                             | Data that favour shared room |
|------------------------------|------|-------------|------------|--------------------------------------------------------------------------------------------------------------------------------------|--------------|-------------------|---------------|---------------------------------------------------------------------------------------------------------------------------------------------------------------|------------------------------------------------------------------------------------------------------------------------|------------------------------|
|                              |      |             |            |                                                                                                                                      |              |                   |               | <i>faecalis</i> , MRSA, <i>Staphylococcus aureus</i> , total)                                                                                                 |                                                                                                                        |                              |
| Davis 2019 <sup>25</sup>     | 67%  | Australia   | Adults     | 1569 patients, 1 hospital relocation                                                                                                 | Orthopaedic  | Elective          | Routine       |                                                                                                                                                               | p=0.251, hospital acquired MRSA infections<br>p=0.865, MRSA present on admission                                       |                              |
| Ferri 2015 <sup>41</sup>     | 100% | Canada      | Adults     | 39 HCPS, of which 13 nurses, 7 respiratory therapists, 5 HCPS (other), 6 physicians, 4 family members<br>4 support staff, 1 hospital | Unclear      | Unclear           | ICU           | Patient perception (6 patients perceived better infection prevention)                                                                                         |                                                                                                                        |                              |
| Gregersen 2021 <sup>46</sup> | 70%  | Denmark     | Elderly    | 446 patients, 1 hospital relocation                                                                                                  | Geriatric    | Unclear           | Routine       | % hospital-acquired infections<br>p=0.01, p=0.03 <sup>a</sup><br>time from admission to first hospital-acquired infection<br>p=0.004 urinary tract infections | p=0.74, pneumonia<br>p=0.50, gastritis<br>p=0.09, sepsis<br>p=0.22, other (wound infection, nephritis, and erysipelas) |                              |
| Halaby 2017 <sup>48</sup>    | 48%  | Netherlands | Unclear    | 16 beds, 1 hospital                                                                                                                  | Unclear      | Unclear           | ICU           | p=0.001, transmission of any Multidrug resistant bacteria<br>p=0.0015,                                                                                        | p=0.37 transmission of <i>Morganella</i> spp                                                                           |                              |

| Citation                    | QA  | Location      | Population | Number of patients/hospitals     | Patient type       | Type of admission | Level of care | Data that favour single room                                                                                                                                             | Data showing no difference                                                                                                                                                                 | Data that favour shared room |
|-----------------------------|-----|---------------|------------|----------------------------------|--------------------|-------------------|---------------|--------------------------------------------------------------------------------------------------------------------------------------------------------------------------|--------------------------------------------------------------------------------------------------------------------------------------------------------------------------------------------|------------------------------|
|                             |     |               |            |                                  |                    |                   |               | transmission of <i>Citrobacter</i> spp<br>p=0.0005<br>transmission of <i>Enterobacter</i> spp                                                                            | p=0.99, transmission of <i>Proteus</i> spp<br>p=0.25, transmission of <i>Serratia</i> spp<br>p=0.39, transmission of <i>Pseudomonas</i> spp                                                |                              |
| Hourigan 2018 <sup>53</sup> | 63% | United States | Neonates   | 32 patients, 1 hospital          | Premature neonates | Emergency         | NICU          | p=0.0001, fewer positive skin swabs<br>p=0.0003, fewer positive environmental swab samples<br>Presence of antibiotic resistance genes (including resistome and virulome) | p=NS<br>comparison of the entire bacterial community at the genus level<br>Potential human pathogenic viruses in 2-week stool, discharge stool and skin samples<br>Species alpha diversity |                              |
| Jansen 2021 <sup>55</sup>   | 63% | Netherlands   | Neonates   | 712 patients 1 hospital, 2 units | Premature neonates | Maternity care    | NICU          |                                                                                                                                                                          | p=0.62, incidence density per 1000 patient-days<br>p=0.59, cumulative incidence per 100 infants<br>p=0.66, skin and/or soft tissue infection<br>p=0.15, conjunctivitis                     |                              |
| Jung 2022 <sup>62</sup>     | 67% | South Korea   | Adults     | 901 patients, 1 hospital         | Mixed              | Unclear           | ICU           | p<0.001 <sup>a</sup> , CRAB acquisition                                                                                                                                  |                                                                                                                                                                                            |                              |

| Citation                    | QA  | Location      | Population | Number of patients/hospitals | Patient type       | Type of admission | Level of care | Data that favour single room                                                                                                                                                                                                                                                                 | Data showing no difference                                                                                             | Data that favour shared room                                                                                                                                                                                                                            |
|-----------------------------|-----|---------------|------------|------------------------------|--------------------|-------------------|---------------|----------------------------------------------------------------------------------------------------------------------------------------------------------------------------------------------------------------------------------------------------------------------------------------------|------------------------------------------------------------------------------------------------------------------------|---------------------------------------------------------------------------------------------------------------------------------------------------------------------------------------------------------------------------------------------------------|
| Lazar 2015 <sup>70</sup>    | 48% | Israel        | Children   | 4162 patients, 1 hospital    | Children           | Mixed             | PICU          | p=0.01, incidence of BSI<br>p=0.03, nosocomial BSI                                                                                                                                                                                                                                           | p=0.26, community-acquired BSI                                                                                         |                                                                                                                                                                                                                                                         |
| McDonald 2019 <sup>80</sup> | 48% | Canada        | Unclear    | 1 hospital relocation        | Mixed              | Mixed             | Mixed         | Enterococcus, MRSA, and <i>Clostridium difficile</i> infections per 10,000 patient-days                                                                                                                                                                                                      | p=NS, decline in rates of <i>Clostridium difficile</i> and MRSA infection                                              |                                                                                                                                                                                                                                                         |
| Puumala 2020 <sup>102</sup> | 67% | United States | Neonates   | 9995 patients, 1 hospital    | Premature neonates | Emergency         | NICU          | p=0.02, sepsis in preterm infants (<28 weeks preterm)                                                                                                                                                                                                                                        | p=0.43, sepsis in preterm infants (28 – 32 weeks preterm)<br>p=0.42, sepsis in preterm infants (32 – 37 weeks preterm) | p=0.001 sepsis in term/post-term infants (>37 weeks)                                                                                                                                                                                                    |
| Song 2018 <sup>119</sup>    | 63% | United States | Neonates   | 171 patients, 1 hospital     | Premature neonates | Emergency         | NICU          | hospital-acquired ESBL-E incidence                                                                                                                                                                                                                                                           |                                                                                                                        |                                                                                                                                                                                                                                                         |
| Teltsch 2011 <sup>131</sup> | 67% | Canada        | Adults     | 19343 patients, 2 hospitals  | Unclear            | Unclear           | ICU           | positive cultures per 10,000 patient-days for yeast, coagulase-negative <i>Staphylococcus</i> spp, <i>Enterococcus</i> spp, <i>Staphylococcus aureus</i> , <i>Escherichia</i> spp, <i>Pseudomonas</i> spp, <i>Klebsiella</i> spp, <i>Clostridium difficile</i> , <i>Corynebacterium</i> spp, |                                                                                                                        | Positive cultures per 10,000 patient-days for <i>Enterobacter</i> spp, <i>Haemophilus</i> spp, MRSA, <i>Streptococcus viridans</i> , <i>Acinetobacter</i> spp, <i>Streptococcus pneumoniae</i> , Group B <i>Streptococcus</i> spp, <i>Neisseria</i> spp |

| Citation                           | QA  | Location      | Population | Number of patients/hospitals | Patient type       | Type of admission | Level of care | Data that favour single room                                                                                                                                                                                  | Data showing no difference                                                                                                                                                                                                                                        | Data that favour shared room                  |
|------------------------------------|-----|---------------|------------|------------------------------|--------------------|-------------------|---------------|---------------------------------------------------------------------------------------------------------------------------------------------------------------------------------------------------------------|-------------------------------------------------------------------------------------------------------------------------------------------------------------------------------------------------------------------------------------------------------------------|-----------------------------------------------|
|                                    |     |               |            |                              |                    |                   |               | <i>Stenotrophomonas maltophilia, Citrobacter spp, Proteus mirabilis, Serratia spp, fungi, VRE, Lactobacillus spp, anaerobic cocci, Morganella spp, Bacteroides spp, Moraxella spp</i>                         |                                                                                                                                                                                                                                                                   |                                               |
| Van der Hoeven 2022 <sup>135</sup> | 63% | Netherlands   | Neonates   | 1293 patients, 1 hospital    | Premature neonates | Unclear           | NICU          | Infection of multidrug-resistant organisms<br>Colonisation of third-generation cephalosporin resistant bacteria                                                                                               | Multidrug-resistant organisms:<br>Bacteraemia<br>Colonisation of third-generation cephalosporin resistant bacteria<br>Third-generation cephalosporin resistant bacteria:<br>Bacteraemia                                                                           | Colonisation of multidrug-resistant organisms |
| Van Veenendaal 2020 <sup>137</sup> | 70% | Netherlands   | Neonates   | 1152 patients, 1 hospital    | Neonates           | Emergency         | NICU          | % treated for early-onset sepsis<br>Overall late-onset sepsis<br>OR 0.55, 0.34-0.90<br>OR <sup>a</sup> 0.49, 0.30-0.81<br>Late-onset probable sepsis<br>OR 0.64, 0.38-1.08<br>OR <sup>a</sup> 0.56, 0.32-0.96 | Culture-proven late-onset sepsis<br>OR 0.83, 0.44-1.56<br>OR <sup>a</sup> 0.74, 0.39-1.41<br>Symptoms of late-onset sepsis<br>OR 0.22, 0.05-1.01<br>OR <sup>a</sup> 0.24, 0.05-1.08<br>Late-onset sepsis<br>OR 0.40, 0.16-1.03<br>OR <sup>a</sup> 0.34, 0.13-1.91 |                                               |
| Vietri 2004 <sup>139</sup>         | 59% | United States | Adults     | 261 patients, 1 hospital     | Mixed              | Unclear           | Routine       |                                                                                                                                                                                                               | Positive MRSA culture                                                                                                                                                                                                                                             |                                               |

| Citation                          | QA  | Location       | Population       | Number of patients/hospitals                                                     | Patient type                           | Type of admission   | Level of care | Data that favour single room                                                                                                                                                                                     | Data showing no difference                                         | Data that favour shared room |
|-----------------------------------|-----|----------------|------------------|----------------------------------------------------------------------------------|----------------------------------------|---------------------|---------------|------------------------------------------------------------------------------------------------------------------------------------------------------------------------------------------------------------------|--------------------------------------------------------------------|------------------------------|
| Vohr 2017 <sup>140</sup>          | 67% | United States  | Neonates         | 651 patients, 1 hospital                                                         | Premature neonates                     | Emergency           | NICU          | $p=0.09$ , sepsis or necrotizing enterocolitis $\geq$ Bell stage IIA                                                                                                                                             | $p=0.052$ , late-onset sepsis                                      |                              |
| Walsh 2006 <sup>142</sup>         | 33% | United States  | Neonates         | 127 nurses, 1 hospital                                                           | Neonates                               | Emergency           | NICU          | $p<0.05$ , catheter-related BSI                                                                                                                                                                                  |                                                                    |                              |
| <b>Contemporaneous comparison</b> |     |                |                  |                                                                                  |                                        |                     |               |                                                                                                                                                                                                                  |                                                                    |                              |
| Bevan 2016 <sup>5</sup>           | 59% | United Kingdom | Adults, Elderly  | 50 patients, 2 hospitals                                                         | Acute medical illness                  | Emergency           | Routine       | Patient perception of hygiene and infection risk                                                                                                                                                                 |                                                                    |                              |
| Bocquet 2021 <sup>9</sup>         | 74% | France         | Adults, Children | 233 patients, 1 hospital                                                         | Mixed, Influenza                       | Elective, Emergency | Routine       | Nosocomial cases<br>Community-acquired cases                                                                                                                                                                     |                                                                    |                              |
| Bracco 2007 <sup>13</sup>         | 74% | Canada         | Adults           | 2522 patients (of whom 207 known MRSA carriers at admission), 1 hospital, 1 ward | Mixed, Post surgery, Medical admission | Mixed               | ICU           | $p<0.001^{u,m}$ , risk of BSI<br>$p<0.05^{u,m}$ , risk of MRSA acquisition<br>$p=0.001^{u,m}$ , risk of <i>Pseudomonas</i> spp acquisition<br>$p<0.001^u$<br>$p<0.03^m$ , risk of <i>Candida</i> spp acquisition |                                                                    |                              |
| Caruso 2014 <sup>19</sup>         | 74% | Brazil         | Adults           | 1253 patients, 1 hospital                                                        | Adults                                 | Mixed               | ICU           |                                                                                                                                                                                                                  | $p=0.19$ acquired infections                                       |                              |
| Cobo 2001 <sup>20</sup>           | 74% | Spain          | Adults           | 50 patients, 1 hospital, 2 wards                                                 | Respiratory, HIV                       | Unclear             | Routine       |                                                                                                                                                                                                                  | $p=0.052$ , likelihood of multi-drug resistant tuberculosis due to |                              |

| Citation                      | QA  | Location      | Population                | Number of patients/hospitals      | Patient type                                                              | Type of admission | Level of care | Data that favour single room                                    | Data showing no difference                                                                 | Data that favour shared room                                                   |
|-------------------------------|-----|---------------|---------------------------|-----------------------------------|---------------------------------------------------------------------------|-------------------|---------------|-----------------------------------------------------------------|--------------------------------------------------------------------------------------------|--------------------------------------------------------------------------------|
|                               |     |               |                           |                                   |                                                                           |                   |               |                                                                 | <i>Mycobacterium bovis</i>                                                                 |                                                                                |
| Everts 1996 <sup>39</sup>     | 52% | New Zealand   | Elderly                   | 27 patients, 1 hospital           | Unclear                                                                   | Rehabilitation    | Routine       | Cases of clinical influenza                                     |                                                                                            |                                                                                |
| Ford-Jones 1990 <sup>44</sup> | 52% | Canada        | Children                  | 1530 patients                     | Cardiological, General admission, Neurosurgical                           | Unclear           | Routine       | Cases of nosocomial diarrhoea (GA and neurosurgical unit)       | Cases of nosocomial diarrhoea (cardiological unit)                                         |                                                                                |
| Fraenkel 2018 <sup>45</sup>   | 67% | Sweden        | Adults, Children, Elderly | 251 patients, 8 hospitals         | Mixed (all hospitalised patients who acquired norovirus during admission) | Unclear           | Routine       | p<0.01, norovirus                                               |                                                                                            |                                                                                |
| Harris 2006 <sup>50</sup>     | 63% | United States | Neonates                  | 21 parents, 75 HCPs, 11 hospitals | Neonates                                                                  | Emergency         | NICU          |                                                                 | Nosocomial BSI                                                                             | Nosocomial pneumonia                                                           |
| Julian 2015 <sup>61</sup>     | 78% | United States | Neonates                  | 1823 patients 1 hospital, 1 unit  | Neonates                                                                  | Mixed             | NICU          | p=0.039, MRSA colonization rate for each additional one patient | p=0.10, incidence of MRSA colonization p=0.89, <i>Clostridium difficile</i> infection rate |                                                                                |
| Jou 2015 <sup>60</sup>        | 74% | United States | Adults                    | 225 patients, 1 hospital          | Mixed                                                                     | Elective          | Mixed         |                                                                 |                                                                                            | p=0.001, nosocomial <i>Clostridium difficile</i> infection p<0.001, malignancy |

| Citation                   | QA   | Location                      | Population                    | Number of patients/hospitals                                 | Patient type                     | Type of admission | Level of care | Data that favour single room                                                      | Data showing no difference                                                                                                                                  | Data that favour shared room |
|----------------------------|------|-------------------------------|-------------------------------|--------------------------------------------------------------|----------------------------------|-------------------|---------------|-----------------------------------------------------------------------------------|-------------------------------------------------------------------------------------------------------------------------------------------------------------|------------------------------|
| Kinnula 2008 <sup>64</sup> | 63%  | Finland                       | Children                      | 1927 patients, 1 hospital                                    | Children, infectious disease     | Mixed             | Routine       | p=0.03, risk for hospital acquired infection                                      |                                                                                                                                                             |                              |
| Kinnula 2012 <sup>65</sup> | 67%  | Finland, Switzerland          | Children                      | 5119 patients, 3 hospitals, 4 wards                          | Children, mixed                  | Mixed             | Routine       | p<0.001, risk for hospital acquired infection during hospitalization (1 hospital) | p=0.56, risk for hospital acquired infection during hospitalization (1 hospital)<br>p=NS, risk of hospital acquired infection after discharge (3 hospitals) |                              |
| Liu 2019 <sup>74</sup>     | 100% | Canada                        | Adults                        | 1 hospital<br>15 parents of hospitalised infants             | Neonates                         | Emergency         | ICU           | Parents' perception (reduced spread of infection)                                 |                                                                                                                                                             |                              |
| Lorenz 2011 <sup>75</sup>  | 78%  | United States                 | Adults, Elderly               | 166 patients, 1 hospital                                     | Medical, Surgical, Oncologic     | Unclear           | Routine       |                                                                                   | p=NS, hospital-acquired infections                                                                                                                          |                              |
| Mattner 2007 <sup>79</sup> | 74%  | Germany                       | Adults                        | 336 patients, 1 hospital                                     | Cardiovascular, Thoracic surgery | Mixed             | ICU           |                                                                                   | Enterococci<br>OR 1.06, 0.36-3.12<br>p=0.91                                                                                                                 |                              |
| Monson 2018 <sup>86</sup>  | 78%  | United States                 | Neonates                      | 90 preterm infants, 15 term-born control infants, 1 hospital | Preterm neonates                 | Emergency         | NICU          |                                                                                   | p=0.38, infection                                                                                                                                           |                              |
| Morgan 2010 <sup>87</sup>  | 44%  | United Kingdom, United States | Adolescents, Adults, Children | 146 patients, 114 HCP, 2 hospitals                           | Unclear                          | Mixed             | Routine       | HCP preference for isolation and infection control                                |                                                                                                                                                             |                              |

| Citation                         | QA   | Location              | Population | Number of patients/hospitals                                                        | Patient type               | Type of admission | Level of care | Data that favour single room                                                                                            | Data showing no difference             | Data that favour shared room |
|----------------------------------|------|-----------------------|------------|-------------------------------------------------------------------------------------|----------------------------|-------------------|---------------|-------------------------------------------------------------------------------------------------------------------------|----------------------------------------|------------------------------|
| Munier-Marion 2016 <sup>88</sup> | 74%  | France                | Adults     | 93 patients, 1 hospital                                                             | Geriatric, Mixed, Surgical | Unclear           | Routine       | p=0.028, p=0.039 <sup>a</sup> , risk of hospital-acquired influenza                                                     | p=0.16, influenza vaccination coverage |                              |
| O'Neill 2018 <sup>94</sup>       | 74%  | United States         | Mixed      | >1 million patients, 218 hospitals with >50% private rooms, 117 with >50% bay rooms | Mixed                      | Mixed             | Mixed         | p<0.001, p=0.005 <sup>a</sup> , central-line-associated BSIs<br>p<0.001, central-line-associated BSIs related mortality |                                        |                              |
| Park 2020 <sup>95</sup>          | 63%  | United States         | Mixed      | 2,670,855 discharges, 340 hospitals                                                 | Mixed                      | Mixed             | Mixed         | p<0.001, p<0.001 <sup>a</sup> , hospital-acquired MRSA infections                                                       |                                        |                              |
| Pilmis 2020 <sup>99</sup>        | 63%  | France                | Adults     | 107 patients, 1 hospital                                                            | Mixed                      | Unclear           | Routine       | p=0.13 <sup>u</sup> , p=0.0005 <sup>m</sup> , contamination                                                             |                                        |                              |
| Quach 2018 <sup>104</sup>        | 59%  | Canada, United States | Children   | 83,334 patient-days, 2 hospitals                                                    | Mixed                      | Mixed             | Mixed         | p<0.0001, hospital-acquired respiratory viral infections                                                                |                                        |                              |
| Sadatsafavi 2016 <sup>111</sup>  | 100% | Canada                | Unclear    | 8811 patient-days, 1 hospital (simulation)                                          | Medical, Surgical          | Unclear           | ICU           | Annual cases of MRSA acquisition, Pseudomonas species acquisition, and Candida species colonization                     |                                        |                              |
| Stiller 2017 <sup>124</sup>      | 59%  | Germany               | Unclear    | 534 units                                                                           | Unclear                    | Unclear           | ICU           | Polymicrobial BSI<br>OR 0.66, 0.51-0.86                                                                                 |                                        |                              |
| Tandberg 2019 <sup>128</sup>     | 67%  | Norway                | Neonates   | 77 patients, 2 hospitals                                                            | Premature neonates         | Emergency         | NICU          |                                                                                                                         | p=0.36, septicaemia                    |                              |



| Citation                    | QA         | Location      | Population | Number of patients/hospitals               | Patient type | Type of admission | Level of care | Data that favour single room                     | Data showing no difference                                     | Data that favour shared room |
|-----------------------------|------------|---------------|------------|--------------------------------------------|--------------|-------------------|---------------|--------------------------------------------------|----------------------------------------------------------------|------------------------------|
| Vaisman 2018 <sup>133</sup> | 67%        | United States | Adults     | 189 patients, 512/515 controls, 1 hospital | Unclear      | Unclear           | Routine       |                                                  | P=NS, hospital-onset <i>Clostridium difficile</i>              |                              |
| Washam 2018 <sup>143</sup>  | 78%        | United States | Neonates   | 1751 patients, 1 hospital                  | Neonates     | Emergency         | NICU          | p=0.03 <sup>u</sup> , p=0.03 <sup>m</sup> , MRSA |                                                                |                              |
| <b>Evidence synthesis</b>   |            |               |            |                                            |              |                   |               |                                                  |                                                                |                              |
| OECD WHO 2019 <sup>92</sup> | Report 14% | Europe        | NR         | NR                                         | Mixed        | Mixed             | Mixed         | p<0.05, hospital-acquired infections             |                                                                |                              |
| Taylor 2018 <sup>129</sup>  | SLR 91%    | International | NR         | NR                                         | Mixed        | Mixed             | Mixed         | 7 studies found advantages only                  | 3 studies found mixed results<br>4 studies found no difference |                              |
| Voigt 2018 <sup>141</sup>   | SLR 86%    | International | NR         | NR                                         | NR           | Unclear           | Routine       | 10 studies                                       | 5 studies                                                      | 16 studies                   |

**Table 7 Summary of studies reporting data on patient safety**

| Citation                                                                      | QA  | Location       | Population      | Number of patients/hospitals                                    | Patient type                 | Type of admission | Level of care | Data that favour single room | Data showing no difference                                                            | Data that favour shared room                                                                           |
|-------------------------------------------------------------------------------|-----|----------------|-----------------|-----------------------------------------------------------------|------------------------------|-------------------|---------------|------------------------------|---------------------------------------------------------------------------------------|--------------------------------------------------------------------------------------------------------|
| <b>Before and after a hospital relocation plus Contemporaneous comparison</b> |     |                |                 |                                                                 |                              |                   |               |                              |                                                                                       |                                                                                                        |
| Maben 2016 <sup>77</sup>                                                      | 67% | United Kingdom | Unclear         | 32 patients, 21 HCP, 1 hospital relocation, 2 control hospitals | Mixed                        | Unclear           | Mixed         |                              |                                                                                       | Falls per 1,000 patient-days                                                                           |
| <b>Before and after a hospital relocation</b>                                 |     |                |                 |                                                                 |                              |                   |               |                              |                                                                                       |                                                                                                        |
| Davis 2019 <sup>25</sup>                                                      | 67% | Australia      | Adults          | 1569 patients, 1 hospital relocation                            | Orthopaedic                  | Elective          | Routine       |                              | p=0.599<br>Falls in hospital<br>p=0.491<br>Unwitnessed fall<br>p=0.082<br>Second fall |                                                                                                        |
| Reid 2015 <sup>107</sup>                                                      | 48% | United Kingdom | Adult, Elderly  | 89 patients, 1 hospital relocation                              | Geriatric                    | Rehabilitation    | Routine       |                              | Falls per 1,000 occupied bed days                                                     |                                                                                                        |
| Singh 2015 <sup>116</sup>                                                     | 70% | United Kingdom | Adults, Elderly | 1749 patients, 1 hospital relocation                            | Internal medicine, Geriatric | Mixed             | Routine       |                              |                                                                                       | p<0.01, p<0.01 <sup>a</sup> , falls per 1,000 patient-bed days<br>p<0.001, falls per in-patient faller |
| <b>Contemporaneous comparison</b>                                             |     |                |                 |                                                                 |                              |                   |               |                              |                                                                                       |                                                                                                        |
| Knight 2016 <sup>66</sup>                                                     | 59% | United Kingdom | Elderly         | 100 patients, 2 hospitals                                       | Geriatric, Dementia          | Mixed             | Routine       |                              | p=0.83, number of patients who sustained inpatient falls                              | p=0.035, falls per inpatient faller                                                                    |
| Lorenz 2011 <sup>75</sup>                                                     | 78% | United States  | Adults, Elderly | 166 patients, 1 hospital                                        | Medical, Surgical, Oncologic | Unclear           | Routine       |                              | p=0.37, likelihood of falls                                                           |                                                                                                        |



| Citation                     | QA         | Location      | Population | Number of patients/hospitals | Patient type | Type of admission | Level of care | Data that favour single room | Data showing no difference    | Data that favour shared room     |
|------------------------------|------------|---------------|------------|------------------------------|--------------|-------------------|---------------|------------------------------|-------------------------------|----------------------------------|
| Poncette 2021 <sup>101</sup> | 55%        | Germany       | Unclear    | 21 beds, 1 hospital          | Unclear      | Unclear           | ICU           |                              |                               | Alarms raised per bed            |
| <b>Evidence synthesis</b>    |            |               |            |                              |              |                   |               |                              |                               |                                  |
| OECD WHO 2019 <sup>92</sup>  | Report 14% | Europe        | NR         | NR                           | Mixed        | Mixed             | Mixed         | p<0.05, patient falls        |                               |                                  |
| Taylor 2018 <sup>129</sup>   | SLR 91%    | International | Adults     | NR                           | Mixed        | Mixed             | Mixed         |                              | No difference                 | 1 study found disadvantages only |
| Voigt 2018 <sup>141</sup>    | SLR 86%    | International | NR         | NR                           | NR           | Unclear           | Routine       |                              | 5 studies found no difference |                                  |

**Table 8. Summary of studies reporting data on readmissions and reinterventions**

| Citation                          | QA  | Location  | Population | Number of patients/ hospitals | Patient type     | Type of admission | Level of care | Data that favour single room | Data showing no difference | Data that favour shared room             |
|-----------------------------------|-----|-----------|------------|-------------------------------|------------------|-------------------|---------------|------------------------------|----------------------------|------------------------------------------|
| <b>Contemporaneous comparison</b> |     |           |            |                               |                  |                   |               |                              |                            |                                          |
| Erdeve 2008 <sup>36</sup>         | 74% | Turkey    | Infants    | 60 infants, 1 hospital        | Preterm neonates | Emergency         | ICU           | p<0.05, hospitalisation      |                            |                                          |
| Felice Tong 2018 <sup>40</sup>    | 78% | Australia | Adults     | 185 patients, 1 hospital      | Orthopaedic      | Elective          | Routine       |                              |                            | p=0.03, return to theatre within 6 weeks |

**Table 9. Summary of studies reporting views on privacy**

| Citation                                                                      | QA   | Location       | Population | Number of patients/hospitals                                    | Patient type | Type of admission | Level of care | Data that favour single room                                                                                           | Data showing no difference                                                                                           | Data that favour shared room |
|-------------------------------------------------------------------------------|------|----------------|------------|-----------------------------------------------------------------|--------------|-------------------|---------------|------------------------------------------------------------------------------------------------------------------------|----------------------------------------------------------------------------------------------------------------------|------------------------------|
| <b>Before and after a hospital relocation plus Contemporaneous comparison</b> |      |                |            |                                                                 |              |                   |               |                                                                                                                        |                                                                                                                      |                              |
| Maben 2016 <sup>77</sup>                                                      | 67%  | United Kingdom | Unclear    | 32 patients, 21 HCP, 1 hospital relocation, 2 control hospitals | Mixed        | Unclear           | Mixed         | Qualitative (privacy, comfort, personal control, visitor flexibility)                                                  |                                                                                                                      |                              |
| <b>Before and after a hospital relocation</b>                                 |      |                |            |                                                                 |              |                   |               |                                                                                                                        |                                                                                                                      |                              |
| Anåker 2019 <sup>3</sup>                                                      | 90%  | Sweden         | Adults     | 16 patients, 1 hospital                                         | Stroke       | Rehabilitation    | Routine       | Qualitative (privacy, personal control)                                                                                |                                                                                                                      |                              |
| Carlson 2006 <sup>17</sup>                                                    | 33%  | United States  | Neonates   | 1 hospital, Patients unclear                                    | Neonates     | Emergency         | ICU           | Parent-reported privacy                                                                                                |                                                                                                                      |                              |
| Carter 2008 <sup>18</sup>                                                     | 33%  | United States  | Adults     | 1 hospital 53 parents                                           | Neonates     | Emergency         | ICU           | p<0.001, patients' perception of privacy                                                                               |                                                                                                                      |                              |
| Curtis 2017 <sup>21</sup>                                                     | 80%  | United Kingdom | Children   | 1 hospital, 4 wards<br>17 patients, 60 caregivers, 60 HCPs      | Paediatric   | Unclear           | Routine       | Qualitative (privacy)                                                                                                  |                                                                                                                      |                              |
| Davis 2019 <sup>25</sup>                                                      | 67%  | Australia      | Adults     | 1569 patients, 1 hospital relocation                            | Orthopaedic  | Elective          | Routine       | Perception of privacy                                                                                                  |                                                                                                                      |                              |
| Domanico 2010 <sup>28</sup>                                                   | 63%  | United States  | Parents    | 1 hospital, 2 units<br>161 caregivers                           | Paediatric   | NR                | NICU          | p<0.001, privacy for bonding (long-stay)<br>Transitional parent perceptions: privacy for bonding and for breastfeeding | p=NS, privacy for bonding (short stay)<br>p=0.111 (short stay),<br>p=0.076 (long stay),<br>privacy for breastfeeding |                              |
| Dowling 2012 <sup>32</sup>                                                    | 63%  | United States  | Parents    | 1 hospital<br>40 mothers                                        | Neonates     | Emergency         | ICU           |                                                                                                                        | p=NS, comfortable pumping breastmilk                                                                                 |                              |
| Ferri 2015 <sup>41</sup>                                                      | 100% | Canada         | Unclear    | 1 hospital, 39 HCPs (13 nurses,                                 | Unclear      | Unclear           | ICU           | Qualitative (privacy)                                                                                                  |                                                                                                                      |                              |

| Citation                   | QA   | Location       | Population       | Number of patients/hospitals                                                              | Patient type                                  | Type of admission | Level of care | Data that favour single room                                                                                                                       | Data showing no difference    | Data that favour shared room |
|----------------------------|------|----------------|------------------|-------------------------------------------------------------------------------------------|-----------------------------------------------|-------------------|---------------|----------------------------------------------------------------------------------------------------------------------------------------------------|-------------------------------|------------------------------|
|                            |      |                |                  | 7 respiratory therapists), 5 HCPs (other), 6 physicians, 4 family members 4 support staff |                                               |                   |               |                                                                                                                                                    |                               |                              |
| Florey 2009 <sup>42</sup>  | 44%  | United Kingdom | Adults           | 2 hospitals, 1 before and after move, 80 patients                                         | Medical and surgical, Adults                  | Unclear           | Routine       | p<0.001, discussing personal matters<br>p<0.001, patient preference                                                                                |                               |                              |
| Harris 2004 <sup>49</sup>  | 74%  | Canada         | Adults           | 1 hospital, 976 patients                                                                  | Pregnant women                                | Maternity         | Routine       | p=0.01, physicians' perception of privacy                                                                                                          |                               |                              |
| Janssen 2000 <sup>56</sup> | 56%  | Canada         | Adults           | 1 hospital, 426 patients                                                                  | Pregnant women                                | Maternity         | Routine       | p<0.001, respect shown by caregiver for privacy<br>p<0.001, greater number of different nurses, doctors, and staff who interacted with the patient |                               |                              |
| Jones 2016 <sup>58</sup>   | 100% | Australia      | Adults, Neonates | 1 hospital relocation 66 mothers, 51 nurses                                               | Adults, Mothers of premature neonates, Nurses | Maternity         | NICU          | Qualitative (privacy)                                                                                                                              |                               |                              |
| Milford 2008 <sup>84</sup> | 30%  | United States  | Neonates         | 1 hospital, patients unclear                                                              | Neonates                                      | Emergency         | ICU           | Staff perceptions of privacy                                                                                                                       |                               |                              |
| Real 2018 <sup>105</sup>   | 56%  | United States  | Unclear          | 111 patients, 77 nurses, 1 hospital                                                       | Cardio-vascular                               | Unclear           | Routine       | Privacy                                                                                                                                            | Communication Help from staff |                              |
| Reid 2015 <sup>107</sup>   | 48%  | United Kingdom | Adult, Elderly   | 89 patients, 1 hospital relocation                                                        | Geriatric                                     | Rehabilitation    | Routine       | Qualitative (privacy)                                                                                                                              |                               |                              |

| Citation                          | QA  | Location       | Population      | Number of patients/hospitals                  | Patient type                           | Type of admission  | Level of care | Data that favour single room                                                   | Data showing no difference | Data that favour shared room |
|-----------------------------------|-----|----------------|-----------------|-----------------------------------------------|----------------------------------------|--------------------|---------------|--------------------------------------------------------------------------------|----------------------------|------------------------------|
| Roos 2020 <sup>108</sup>          | 90% | Norway         | Adults          | 39 patients, 1 hospital relocation            | Internal medicine, Surgical, Maternity | Maternity, Unclear | Routine       | Qualitative (privacy)                                                          |                            |                              |
| Stevens 2011 <sup>121</sup>       | 52% | United States  | Adults          | 1 hospital, 147 patients                      | Neonates                               | Emergency          | ICU           | Patient-reported privacy                                                       |                            |                              |
| Swanson 2013 <sup>125</sup>       | 37% | United States  | Adults          | 1 hospital 55 parents                         | Neonates                               | Emergency          | ICU           | p<0.05, nurses', patients', and advanced practitioners' perceptions of privacy |                            |                              |
| <b>Contemporaneous comparison</b> |     |                |                 |                                               |                                        |                    |               |                                                                                |                            |                              |
| Apple 2014 <sup>4</sup>           | 52% | Sweden         | Adults          | 3 ICUs 81 HCP                                 | Mixed                                  | Unclear            | ICU           | Staff perceptions of privacy                                                   |                            |                              |
| Bevan 2016 <sup>5</sup>           | 59% | United Kingdom | Adults, elderly | 2 hospitals 50 patients                       | Aged 65+ years with acute illness      | Emergency          | Routine       | Qualitative (privacy)                                                          |                            |                              |
| Bodack 2016 <sup>10</sup>         | 56% | Germany        | Adults          | 1 hospital 35 pairs of parents of 40 neonates | Neonates                               | Emergency          | ICU           | Patient reported privacy                                                       |                            |                              |
| Boztepe 2017 <sup>12</sup>        | 63% | Turkey         | Children        | 1 hospital, 1 ward 130                        | Children                               | Mixed              | Routine       |                                                                                |                            | Lack of privacy              |
| Deitrick 2010 <sup>26</sup>       | 90% | United States  | Adults          | 24 patients, 29 HCP, 2 hospitals, 2 wards     | Orthopaedic, Neurological, Surgical    | Unclear            | Routine       | Patient preference for privacy                                                 |                            |                              |
| Douglas 2005 <sup>30</sup>        | 90% | United Kingdom | Adults          | 1 hospital 785 patients (post discharge)      | Adults                                 | Unclear            | Routine       |                                                                                | <i>Mixed results</i>       |                              |
| Ehrlander 2009 <sup>35</sup>      | 78% | United States  | Adults, elderly | 1 hospital 117 patients                       | Adults                                 | Unclear            | Routine       | p<0.01, adequate privacy                                                       |                            |                              |

| Citation                    | QA   | Location                      | Population      | Number of patients/hospitals                                            | Patient type                                        | Type of admission | Level of care | Data that favour single room                                                       | Data showing no difference | Data that favour shared room |
|-----------------------------|------|-------------------------------|-----------------|-------------------------------------------------------------------------|-----------------------------------------------------|-------------------|---------------|------------------------------------------------------------------------------------|----------------------------|------------------------------|
| Harris 2006 <sup>50</sup>   | 63%  | United States                 | Adults          | 5 NICU units<br>SFR=2<br>Open-bay=3<br>HCPs=75<br>Parents=21            | Neonates                                            | Maternity         | Level 3, NICU | Parent preference for privacy                                                      |                            |                              |
| Hosseini 2017 <sup>52</sup> | 63%  | Iran                          | Adults          | 2 hospitals<br>132 patients                                             | Adults, Medical or surgical                         | Unclear           | Routine       | p<0.001, adequate privacy                                                          |                            |                              |
| Janssen 2006 <sup>57</sup>  | 59%  | Canada                        | Adults          | 1 hospital, 2 wards<br>415 patients                                     | Pregnant women                                      | Maternity         | Routine       | Patient satisfaction with for respect for privacy                                  |                            |                              |
| Liu 2019 <sup>74</sup>      | 100% | Canada                        | Adults          | 1 hospital<br>15 parents of hospitalised infants                        | Neonates                                            | Emergency         | ICU           | Privacy enabled the learning and practice of caregiving skills                     |                            |                              |
| Malcolm 2005 <sup>78</sup>  | 80%  | New Zealand                   | Adults          | Hospitals unclear, 12 former patients                                   | Mixed surgery, orthopaedic, medical, obstetric, ENT | Mixed             | Routine       | Qualitative (privacy)                                                              |                            | Qualitative (supportive)     |
| Morgan 2010 <sup>87</sup>   | 44%  | United Kingdom, United States | Children        | 2 hospitals<br>146 patients, 114 HCP                                    | Children                                            | Mixed             | Routine       | Patient perception (privacy)<br>HCP perception (privacy, dignity, confidentiality) |                            |                              |
| Nahas 2016 <sup>89</sup>    | 56%  | United Kingdom                | Adults, Elderly | 60 patients, 2 hospitals                                                | Orthopaedic                                         | Elective          | Routine       | p=0.004, better privacy                                                            |                            |                              |
| Nash 2021 <sup>90</sup>     | 63%  | Australia                     | Adults          | 4 hospitals<br>602 patients                                             | Indigenous Adults                                   | Theoretical       | Routine       | Qualitative (privacy)                                                              |                            |                              |
| Nassery 2019 <sup>91</sup>  | 90%  | Sweden                        | Adults          | 1 hospital, 13 interviews (9 individual parents and 4 pairs of parents) | Children                                            | Unclear           | Mixed         | Qualitative (privacy, comfort)                                                     |                            |                              |



| Citation                                              | QA            | Location       | Population         | Number of patients/hospitals            | Patient type                                   | Type of admission | Level of care | Data that favour single room                              | Data showing no difference                      | Data that favour shared room                 |
|-------------------------------------------------------|---------------|----------------|--------------------|-----------------------------------------|------------------------------------------------|-------------------|---------------|-----------------------------------------------------------|-------------------------------------------------|----------------------------------------------|
| Olson 1992 <sup>93</sup>                              | 52%           | United States  | Adults             | 1 hospital<br>351 patients,<br>28 HCP   | Pregnant women                                 | Maternity         | Routine       | Patient preference (privacy)                              |                                                 |                                              |
| Persson 2012 <sup>97</sup>                            | 90%           | Sweden         | Adults,<br>Elderly | 16 patients,<br>10 nurses<br>1 hospital | Orthopaedic,<br>Surgical                       | Unclear           | Routine       | Patients in shared rooms signalled their need for privacy |                                                 |                                              |
| Persson 2015 <sup>98</sup>                            | 90%           | Sweden         | Adults             | 16 patients,<br>1 hospital              | Surgical                                       | Unclear           | Routine       | Feelings of homeliness                                    |                                                 |                                              |
| Rowlands 2008 <sup>110</sup>                          | 90%           | United Kingdom | Adults             | 1 hospital<br>12                        | Adults with advanced cancer                    | Unclear           | Routine       | Patient preference (privacy)                              |                                                 |                                              |
| Schalkers 2015 <sup>114</sup>                         | 100%          | Netherlands    | Children           | 8 hospitals<br>63 patients              | Children                                       | Mixed             | Routine       | Qualitative (children's preferences for privacy)          |                                                 |                                              |
| Stelwagen 2021 <sup>120</sup>                         | 100%          | Netherlands    | Adults             | 1 hospital<br>36 parents                | Neonates                                       | Emergency         | ICU           |                                                           |                                                 | Privacy violations felt more in single rooms |
| Van de Glind 2008 <sup>134</sup>                      | 74%           | Netherlands    | Adults             | 1 hospital<br>52 encounters             | Urology                                        | Unclear           | Routine       |                                                           | Frequency or content of intimate communications |                                              |
| <b>Evidence synthesis</b>                             |               |                |                    |                                         |                                                |                   |               |                                                           |                                                 |                                              |
| Bradbury-Jones 2013 <sup>14</sup>                     | SLR<br>86%    | International  | Adults             | NR                                      | Mixed,<br>Vulnerable,<br>Learning difficulties | Unclear           | Unclear       | Side rooms ensure privacy                                 |                                                 |                                              |
| Dowdeswell 2004 <sup>31</sup>                         | SLR<br>36%    | International  | Unclear            | Unclear                                 | Mixed                                          | Mixed             | Mixed         | More privacy, which contributes to better outcomes        | No quantifiable evidence of improved outcomes   |                                              |
| Mental Welfare Commission Scotland 1991 <sup>82</sup> | Report<br>30% | United Kingdom | Unclear            | 258 patients,<br>28 hospitals           | Psychiatric                                    | Unclear           | Routine       | Easier to meet with visitors                              |                                                 |                                              |

| Citation                        | QA         | Location      | Population | Number of patients/hospitals | Patient type                       | Type of admission | Level of care | Data that favour single room                   | Data showing no difference                        | Data that favour shared room |
|---------------------------------|------------|---------------|------------|------------------------------|------------------------------------|-------------------|---------------|------------------------------------------------|---------------------------------------------------|------------------------------|
| OECD WHO 2019 <sup>92</sup>     | Report 14% | Europe        | NR         | NR                           | Mixed                              | Mixed             | Mixed         | p<0.05, improved patient privacy               |                                                   |                              |
| Søndergaard 2022 <sup>118</sup> | SLR 91%    | International | NR         | NR                           | Acute, Surgical, Internal medicine | Unclear           | Routine       | Privacy, personal control and self-empowerment |                                                   |                              |
| Taylor 2018 <sup>129</sup>      | SLR 91%    | International | NR         | NR                           | Mixed                              | Mixed             | Mixed         |                                                | All studies reported advantages and disadvantages |                              |

**Table 10. Summary of studies reporting views on patients' loneliness/isolation and family contact**

| Citation                                                                      | QA  | Location       | Population      | Number of patients/hospitals                                    | Patient type                     | Type of admission | Level of care | Data that favour single room            | Data showing no difference             | Data that favour shared room                                                                                                                                                                                             |
|-------------------------------------------------------------------------------|-----|----------------|-----------------|-----------------------------------------------------------------|----------------------------------|-------------------|---------------|-----------------------------------------|----------------------------------------|--------------------------------------------------------------------------------------------------------------------------------------------------------------------------------------------------------------------------|
| <b>Before and after a hospital relocation plus Contemporaneous comparison</b> |     |                |                 |                                                                 |                                  |                   |               |                                         |                                        |                                                                                                                                                                                                                          |
| Maben 2016 <sup>77</sup>                                                      | 67% | United Kingdom | Unclear         | 32 patients, 21 HCP, 1 hospital relocation, 2 control hospitals | Mixed (all patients in hospital) | Unclear           | Mixed         |                                         | Mixed findings regarding communication | Not isolated<br>More interactions with other patients                                                                                                                                                                    |
| <b>Before and after a hospital relocation</b>                                 |     |                |                 |                                                                 |                                  |                   |               |                                         |                                        |                                                                                                                                                                                                                          |
| Anåker 2017 <sup>2</sup>                                                      | 59% | Sweden         | Adults          | 59 patients, 1 hospital                                         | Stroke                           | Rehabilitation    | Routine       |                                         |                                        | Not isolated<br>Availability of interactions with physicians, nurses, nurse assistants, physiotherapists, occupational therapists, speech and language therapist, significant other, other team member, and interpreters |
| Anåker 2019 <sup>3</sup>                                                      | 90% | Sweden         | Adults          | 16 patients, 1 hospital                                         | Stroke                           | Rehabilitation    | Routine       |                                         |                                        | Less feeling of loneliness and emptiness<br>Have company to talk to                                                                                                                                                      |
| Bevan 2016 <sup>5</sup>                                                       | 59% | United Kingdom | Adults, Elderly | 50 patients, 2 hospitals                                        | Acute illness                    | Emergency         | Routine       | Private toilet and showering facilities |                                        | Less feeling of loneliness and isolation<br>Greater companionship and goodwill                                                                                                                                           |

| Citation                        | QA  | Location       | Population  | Number of patients/hospitals                             | Patient type | Type of admission | Level of care | Data that favour single room                                                                                                                                                                                                                                                                         | Data showing no difference                                                                                     | Data that favour shared room                                               |
|---------------------------------|-----|----------------|-------------|----------------------------------------------------------|--------------|-------------------|---------------|------------------------------------------------------------------------------------------------------------------------------------------------------------------------------------------------------------------------------------------------------------------------------------------------------|----------------------------------------------------------------------------------------------------------------|----------------------------------------------------------------------------|
| Campbell-Yeo 2021 <sup>15</sup> | 74% | Canada         | Neonates    | 71 mothers, 2 wards                                      | Neonates     | Emergency         | ICU           | More parental presence and involvement, including time with skin-to-skin contact, singing/ talking/ reading to infant, bathing, diaper changes, and providing comfort during painful procedures. More time partner spent holding infants clothed. Partner attended rounds at least once during stay. | Mothers' attendance at rounds<br>Time mothers spent bathing infants                                            | <i>More time mothers spent holding infants clothed</i>                     |
| Curtis 2017 <sup>21</sup>       | 80% | United Kingdom | Children    | 17 patients, 60 caregivers, 60 HCPs, 1 hospital, 4 wards | Paediatric   | Unclear           | Routine       | Enhanced family support                                                                                                                                                                                                                                                                              |                                                                                                                | Socialisation<br>Not isolated                                              |
| Cusack 2019 <sup>22</sup>       | 56% | Australia      | Adults, HCP | 43 nurses, 15 patients, 1 hospital                       | Unclear      | Unclear           | Routine       |                                                                                                                                                                                                                                                                                                      |                                                                                                                | Not isolated                                                               |
| Domanico 2010 <sup>28</sup>     | 63% | United States  | Neonates    | 161 caregivers, 1 hospital, 2 units                      | Paediatric   | NR                | NICU          | p=0.012, ability to relax with child (long stay)                                                                                                                                                                                                                                                     | p=0.065, perceptions of meeting other parents (short stay)<br>p=0.142 (short stay), p=0.542 (long stay), other | Socialisation<br>p=0.036, perceptions of meeting other parents (long stay) |

| Citation                   | QA   | Location       | Population | Number of patients/hospitals                                                                                                      | Patient type                                  | Type of admission | Level of care | Data that favour single room                                                                                                                                        | Data showing no difference                                                                                                                                      | Data that favour shared room                                       |
|----------------------------|------|----------------|------------|-----------------------------------------------------------------------------------------------------------------------------------|-----------------------------------------------|-------------------|---------------|---------------------------------------------------------------------------------------------------------------------------------------------------------------------|-----------------------------------------------------------------------------------------------------------------------------------------------------------------|--------------------------------------------------------------------|
|                            |      |                |            |                                                                                                                                   |                                               |                   |               |                                                                                                                                                                     | parents made stay easier<br>p=0.879, ability to relax with child (short stay)                                                                                   |                                                                    |
| Ferri 2015 <sup>41</sup>   | 100% | Canada         | Adults     | 39 HCPs, of which 13 nurses, 7 respiratory therapists, 5 HCPS (other), 6 physicians, 4 family members 4 support staff, 1 hospital | Unclear                                       | Unclear           | ICU           | Increased visitor presence<br>Increased visitor-provider interaction<br>Accommodates Routine and emergency care<br>Patient satisfaction<br>Confidentiality/ privacy |                                                                                                                                                                 | Socialisation<br>Camaraderie                                       |
| Florey 2009 <sup>42</sup>  | 44%  | United Kingdom | Adults     | 80 patients, 2 hospitals, 1 Before and after move                                                                                 | Medical and surgical, Adults                  | Unclear           | Routine       | p=0.002, better for visitors                                                                                                                                        |                                                                                                                                                                 | p<0.001, less loneliness                                           |
| Janssen 2000 <sup>56</sup> | 56%  | Canada         | Adults     | 426 patients, 1 hospital                                                                                                          | Pregnant women                                | Maternity         | Routine       |                                                                                                                                                                     | <i>Patient satisfaction regardless of room design:<br/>p=0.005, time spent with support person<br/>p=0.007, time spent with baby<br/>p=0.39, amount of rest</i> |                                                                    |
| Jones 2016 <sup>58</sup>   | 100% | Australia      | Neonates   | 66 mothers, 51 nurses, 1 hospital relocation                                                                                      | Adults, Mothers of premature neonates, Nurses | Maternity         | NICU          | Qualitative (personal control, homeliness, accommodates overnight stay, facilitates mother-                                                                         |                                                                                                                                                                 | p<0.05, more support<br><br>Qualitative objections to single rooms |

| Citation                      | QA  | Location       | Population      | Number of patients/hospitals                             | Patient type                           | Type of admission         | Level of care | Data that favour single room                                                | Data showing no difference                                       | Data that favour shared room                                                                                                                                                         |
|-------------------------------|-----|----------------|-----------------|----------------------------------------------------------|----------------------------------------|---------------------------|---------------|-----------------------------------------------------------------------------|------------------------------------------------------------------|--------------------------------------------------------------------------------------------------------------------------------------------------------------------------------------|
|                               |     |                |                 |                                                          |                                        |                           |               | infant connection, confidence, parental skills, breastfeeding, and bonding) |                                                                  | (inconsistent or lack of information, poor interpersonal skills, loneliness, isolation; shared rooms - shared information from other patients, and other patient-nurse interactions) |
| Kainiemi 2021 <sup>63</sup>   | 59% | Finland        | Neonates        | 61 families, 1 hospital, 1 unit (pre-post-restructuring) | Pre-term infants (<35 weeks)           | Unclear                   | NICU          | p<0.0001, parents', mother's, and father's presence                         | p=NS, skin-to-skin contact with either parent, mother, or father |                                                                                                                                                                                      |
| Real 2018 <sup>105</sup>      | 56% | United States  | Unclear         | 111 patients, 77 nurses, 1 hospital                      | Cardio-vascular                        | Unclear                   | Routine       | Qualitative (visitor comfort, better family dynamic)                        |                                                                  |                                                                                                                                                                                      |
| Reid 2015 <sup>107</sup>      | 48% | United Kingdom | Adult, Elderly  | 89 patients, 1 hospital relocation                       | Geriatric                              | Rehabilitation            | Routine       |                                                                             | % feeling lonely                                                 |                                                                                                                                                                                      |
| Roos 2020 <sup>108</sup>      | 90% | Norway         | Adults          | 39 patients, 1 hospital relocation                       | Internal medicine, Surgical, Maternity | Maternity, Unclear        | Routine       | Visiting hours                                                              |                                                                  | Less boredom<br>Not isolated                                                                                                                                                         |
| Rosbergen 2020 <sup>109</sup> | 74% | Australia      | Adults, Elderly | 73 patients, 1 hospital relocation                       | Stroke, Neurological                   | Emergency, Rehabilitation | Routine       | p=0.02, physical activity                                                   | P=NS, social activity<br>Cognitive activity                      | Less feeling of loneliness                                                                                                                                                           |
| Singh 2016 <sup>116</sup>     | 70% | United Kingdom | Adults, Elderly | 100 patients, 1 hospital relocation                      | Internal medicine, Geriatric           | Mixed                     | Routine       |                                                                             |                                                                  | p=0.03 <sup>a</sup> , less feeling of loneliness                                                                                                                                     |
| Stevens 2011 <sup>121</sup>   | 52% | United States  | Neonates        | 147 patients, 1 hospital Before                          | Neonates                               | Emergency                 | ICU           | Space for family Accommodations for parents                                 |                                                                  |                                                                                                                                                                                      |

| Citation                         | QA  | Location                     | Population | Number of patients/hospitals                        | Patient type         | Type of admission | Level of care | Data that favour single room                                                                                                          | Data showing no difference                                                                                                      | Data that favour shared room                         |
|----------------------------------|-----|------------------------------|------------|-----------------------------------------------------|----------------------|-------------------|---------------|---------------------------------------------------------------------------------------------------------------------------------------|---------------------------------------------------------------------------------------------------------------------------------|------------------------------------------------------|
|                                  |     |                              |            | and after relocation                                |                      |                   |               |                                                                                                                                       |                                                                                                                                 |                                                      |
| Stevens 2012 <sup>122</sup>      | 44% | United States                | Neonates   | 73 patients, 1 hospital Before and after relocation | Neonates             | Emergency         | ICU           | p=0.017, family-centred care                                                                                                          |                                                                                                                                 |                                                      |
| Toivonen 2017 <sup>132</sup>     | 63% | Finland                      | Neonates   | 20 nurses, 1 hospital Before and after relocation   | Neonates             | Emergency         | ICU           | p<0.0001, total nurse-family interaction time<br>p=0.001, total nurse-parent interaction time                                         | p=NS, total nurse-infant interaction time                                                                                       |                                                      |
| Contemporaneous comparison       |     |                              |            |                                                     |                      |                   |               |                                                                                                                                       |                                                                                                                                 |                                                      |
| Apple 2014 <sup>4</sup>          | 52% | Sweden                       | Unclear    | 81 HCP, 3 ICUs                                      | Mixed                | Unclear           | ICU           | Qualitative support for single rooms (family involvement, family presence during care)                                                |                                                                                                                                 |                                                      |
| Bodack 2016 <sup>10</sup>        | 56% | Germany                      | Neonates   | 35 pairs of parents of 40 neonates, 1 hospital      | Neonates             | Emergency         | ICU           | More secure/confident caring for baby                                                                                                 |                                                                                                                                 | Contact and exchange of knowledge with other parents |
| Darcy Mahoney 2020 <sup>23</sup> | 59% | United States, International | Neonates   | NR, 277 units                                       | Paediatric, new-born | NR                | NICU          | p=0.018, parental presence following COVID-19 restrictions<br>p=0.013, parental presence during rounds prior to COVID-19 restrictions | p=NS, parental presence prior to COVID-19 restrictions<br>p=0.6, parental presence during rounds prior to COVID-19 restrictions |                                                      |

| Citation                                             | QA   | Location      | Population          | Number of patients/hospitals                         | Patient type                                        | Type of admission | Level of care | Data that favour single room                                         | Data showing no difference                                   | Data that favour shared room                                      |
|------------------------------------------------------|------|---------------|---------------------|------------------------------------------------------|-----------------------------------------------------|-------------------|---------------|----------------------------------------------------------------------|--------------------------------------------------------------|-------------------------------------------------------------------|
| De Matos 2020 <sup>27</sup>                          | 63%  | Brazil        | Unclear             | 176 family visitors, 1 hospital, 4 ICU units         | Cancer                                              | Unclear           | ICU           |                                                                      | p=0.52, stress within 24 hrs<br>p=0.15, stress within 7 days |                                                                   |
| Ehrlander 2009 <sup>35</sup>                         | 78%  | United States | Adults              | 117 patients, 1 hospital                             | Adults                                              | Unclear           | Routine       | Accommodates visitors                                                | p=0.913, loneliness                                          | >50% enjoy conversation with room mate and gave help to room mate |
| Erdeve 2008 <sup>36</sup>                            | 74%  | Turkey        | Infants             | 60 infants<br>1 hospital                             | Preterm neonates                                    | Emergency         | ICU           |                                                                      |                                                              | Time spent with infants during non-hospitalised time              |
| Harris 2006, <sup>50</sup> Harris 2006 <sup>51</sup> | 63%  | United States | Neonates            | 75 HCP, 21 parents, 5 NICU units (SFR=2, open bay=3) | Neonates                                            | Unclear           | Level 3, NICU |                                                                      | Contact with other parents                                   |                                                                   |
| Hosseini 2017 <sup>52</sup>                          | 63%  | Iran          | Adults              | 132 patients, 2 hospitals                            | Medical, Surgical                                   | Unclear           | Routine       | p<0.001, visitor convenience                                         |                                                              | p<0.001, less feeling of loneliness                               |
| Liu 2019 <sup>74</sup>                               | 100% | Canada        | Neonates            | 15 parents, 1 hospital                               | Neonates                                            | Emergency         | ICU           | Qualitative (engage in parenting activities beyond basic caregiving) | Qualitative (isolation)                                      |                                                                   |
| Malcolm 2005 <sup>78</sup>                           | 80%  | New Zealand   | Adolescents, Adults | 12 former patients                                   | Mixed surgery, orthopaedic, medical, obstetric, ENT | Mixed             | Routine       |                                                                      |                                                              | Qualitative (camaraderie and support)                             |
| Milford 2008 <sup>84</sup>                           | 30%  | United States | Neonates            | No. of patients unclear, 1 hospital                  | Neonates                                            | Emergency         | ICU           | Staff perception of discussions with families                        |                                                              |                                                                   |



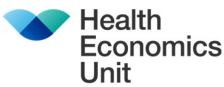

| Citation                   | QA  | Location       | Population      | Number of patients/hospitals       | Patient type                                    | Type of admission | Level of care | Data that favour single room                                                | Data showing no difference                   | Data that favour shared room                                                                                      |
|----------------------------|-----|----------------|-----------------|------------------------------------|-------------------------------------------------|-------------------|---------------|-----------------------------------------------------------------------------|----------------------------------------------|-------------------------------------------------------------------------------------------------------------------|
| Morgan 2010 <sup>87</sup>  | 44% | UK, US         | Children        | 146 patients, 114 HCP, 2 hospitals | Children                                        | Mixed             | Routine       | Patients' privacy<br>Visitor times<br>Undisturbed sleep<br>Personal control |                                              | Patients:<br>Communication<br>Company<br>Entertainment<br><br>HCPs:<br>Interaction with other patients<br>Company |
| Nahas 2016 <sup>89</sup>   | 56% | United Kingdom | Adults, Elderly | 60 patients, 2 hospitals           | Orthopaedic                                     | Elective          | Routine       |                                                                             | p=0.754, isolation<br>p=0.638, loneliness    |                                                                                                                   |
| Nash 2021 <sup>90</sup>    | 63% | United Kingdom | Adults, Elderly | 100 patients,                      | Adults >65 years, recovering from acute illness | Emergency         | Routine       | Company of family, not strangers                                            |                                              | Qualitative (not isolated, social interactions)                                                                   |
| Nassery 2019 <sup>91</sup> | 90% | Sweden         | Children        | 13 parents, 1 hospital             | Children                                        | Unclear           | Mixed         | Qualitative (patient preference, privacy, stress, quieter)                  |                                              | Qualitative (shared experience and advice)                                                                        |
| Olson 1992 <sup>93</sup>   | 52% | United States  | Adults          | 351 patients, 28 HCP, 1 hospital   | Pregnant women                                  | Maternity         | Routine       |                                                                             | <i>Mothers satisfied with visiting hours</i> |                                                                                                                   |
| Pease 2002 <sup>96</sup>   | 48% | United Kingdom | Unclear         | 50 patients, 1 hospital            | Oncologic, Terminal                             | Unclear           | Routine       |                                                                             |                                              | Qualitative (not isolated)                                                                                        |
| Persson 2012 <sup>97</sup> | 90% | Sweden         | Adults, Elderly | 16 patients, 10 nurses, 1 hospital | Orthopaedic, Surgical                           | Unclear           | Routine       |                                                                             |                                              | Qualitative (not isolated)                                                                                        |
| Persson 2015 <sup>98</sup> | 90% | Sweden         | Adults          | 16 patients, 1 hospital            | Surgical                                        | Unclear           | Routine       |                                                                             |                                              | Qualitative (not isolated, company, social contact)                                                               |
| Pineda 2012 <sup>100</sup> | 70% | United States  | Neonates        | 81 patients, 1 hospital            | Premature neonates                              | Emergency         | NICU          | p=0.021 <sup>a</sup> , time parents spent                                   | p=NS, time parents spent holding the infant  |                                                                                                                   |

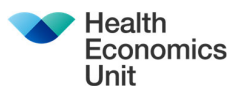

1  
2  
3  
4  
5  
6  
7  
8  
9  
10  
11  
12  
13  
14  
15  
16  
17  
18  
19  
20  
21  
22  
23  
24  
25  
26  
27  
28  
29  
30  
31  
32  
33  
34  
35  
36  
37  
38  
39  
40  
41  
42  
43  
44  
45  
46  
47

| Citation                     | QA  | Location       | Population | Number of patients/hospitals | Patient type                | Type of admission | Level of care | Data that favour single room                                                                                                                                                                                                                                                                   | Data showing no difference                                                                                                                                                                                                                                                                                                                                                                                                                                                                                                                 | Data that favour shared room      |
|------------------------------|-----|----------------|------------|------------------------------|-----------------------------|-------------------|---------------|------------------------------------------------------------------------------------------------------------------------------------------------------------------------------------------------------------------------------------------------------------------------------------------------|--------------------------------------------------------------------------------------------------------------------------------------------------------------------------------------------------------------------------------------------------------------------------------------------------------------------------------------------------------------------------------------------------------------------------------------------------------------------------------------------------------------------------------------------|-----------------------------------|
|                              |     |                |            |                              |                             |                   |               | visiting the infant (week 1-2)<br>p=0.039, time spent cuddling, visiting, and with skin-to-skin contact (week 1-2)<br>p=0.026, p=0.017 <sup>a</sup> , time parents spent visiting the infant during weeks 3-4<br>p=0.062, p=0.047 <sup>a</sup> , time parents spent visiting the infant by LOS | p=0.193, time parents spent visiting the infant (week 5-term)<br>p=0.593, interval to first time parents hold infant<br>p=0.810, days spent cuddling infant (week 1-2)<br>p=0.548, days spent cuddling infant (week 3-4)<br>p=0.592, days spent cuddling infant (week 5-term)<br>p=0.361, days spent cuddling infant by LOS<br>p=0.496, days with skin-to-skin (week 1-2)<br>p=0.111, days with skin-to-skin contact (week 3-4)<br>p=0.489, days with skin-to-skin contact (week 5-term)<br>p=0.360, days with skin-to-skin contact by LOS |                                   |
| Rowlands 2008 <sup>110</sup> | 90% | United Kingdom | Adults     | 12 patients, 1 hospital      | Adults with advanced cancer | Unclear           | Routine       | Qualitative (privacy)                                                                                                                                                                                                                                                                          |                                                                                                                                                                                                                                                                                                                                                                                                                                                                                                                                            | Qualitative (social interactions) |

| Citation                      | QA   | Location      | Population       | Number of patients/hospitals                       | Patient type                 | Type of admission | Level of care | Data that favour single room                                                                                                                                                                                                      | Data showing no difference                                                                                           | Data that favour shared room                                                            |
|-------------------------------|------|---------------|------------------|----------------------------------------------------|------------------------------|-------------------|---------------|-----------------------------------------------------------------------------------------------------------------------------------------------------------------------------------------------------------------------------------|----------------------------------------------------------------------------------------------------------------------|-----------------------------------------------------------------------------------------|
| Schalkers 2015 <sup>114</sup> | 100% | Netherlands   | Children         | 8 hospitals<br>63 patients                         | Children                     | Mixed             | Routine       |                                                                                                                                                                                                                                   |                                                                                                                      | Qualitative (company, patient preference if they have similarities with other patients) |
| Stelwagen 2021 <sup>120</sup> | 100% | Netherlands   | Neonates         | 36 parents, 1 hospital Before and after relocation | Neonates                     | Emergency         | ICU           | Qualitative (family communication and closeness, personal control, privacy, tranquillity, comfort, practicing parenting skills)                                                                                                   |                                                                                                                      | Qualitative (not isolated, ability to distance themselves from invasive procedures)     |
| Swanson 2013 <sup>125</sup>   | 37%  | United States | Neonates, Carers | 55 parents, 1 hospital                             | Neonates                     | Emergency         | NICU          | p<0.05 advanced practitioners' satisfaction with communication                                                                                                                                                                    |                                                                                                                      | p<0.05, nurse satisfaction with communication<br>p<0.05, nurse satisfaction with team   |
| Tandberg 2018 <sup>126</sup>  | 70%  | Norway        | Neonates         | 64 patients, 115 parents, 2 hospitals              | Neonates, Premature neonates | Emergency         | ICU           | p<0.001, time mother and father present during first 14 days<br>p=0.02, mother's skin-to-skin contact per 24 h<br>p=0.05, father's skin-to-skin contact per 24 h<br>p=0.02, guidance provided by the staff meets needs of mothers | p=0.53, guidance provided by the staff meets needs of fathers<br>p=0.21, fathers felt their opinions were considered |                                                                                         |



1  
2  
3  
4  
5  
6  
7  
8  
9  
10  
11  
12  
13  
14  
15  
16  
17  
18  
19  
20  
21  
22  
23  
24  
25  
26  
27  
28  
29  
30  
31  
32  
33  
34  
35  
36  
37  
38  
39  
40  
41  
42  
43  
44  
45  
46  
47

| Citation                     | QA  | Location | Population | Number of patients/hospitals         | Patient type | Type of admission | Level of care | Data that favour single room                                                                                                                                                                                                        | Data showing no difference | Data that favour shared room |
|------------------------------|-----|----------|------------|--------------------------------------|--------------|-------------------|---------------|-------------------------------------------------------------------------------------------------------------------------------------------------------------------------------------------------------------------------------------|----------------------------|------------------------------|
|                              |     |          |            |                                      |              |                   |               | p=0.04, mothers felt their opinions were considered p<0.001 (mothers), p=0.01 (fathers), participation in doctor visits, respectively p=0.05 (mothers), p<0.001 (fathers), emotion support received from staff                      |                            |                              |
| Tandberg 2019 <sup>127</sup> | 67% | Norway   | Infants    | 77 infants, 132 parents, 2 hospitals | Infants      | Emergency         | ICU           | p<0.0001, mother's and father's presence in week 1 p<0.0001, mother's and father's presence per day up to week 34                                                                                                                   |                            |                              |
| Tandberg 2019 <sup>128</sup> | 67% | Norway   | Neonates   | 77 patients, 2 hospitals             | Neonates     | Emergency         | ICU           | p<0.001, mother's presence in week 1 p value<0.001, father's presence in week 1 p<0.001, mother's presence overall and continuous p<0.001, father's presence overall and continuous p<0.001, skin-to-skin contact per day in week 1 |                            |                              |

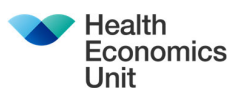

1  
2  
3  
4  
5  
6  
7  
8  
9  
10  
11  
12  
13  
14  
15  
16  
17  
18  
19  
20  
21  
22  
23  
24  
25  
26  
27  
28  
29  
30  
31  
32  
33  
34  
35  
36  
37  
38  
39  
40  
41  
42  
43  
44  
45  
46  
47

| Citation                           | QA         | Location                     | Population | Number of patients/hospitals | Patient type        | Type of admission | Level of care | Data that favour single room                                                                                                                                                                                                                                                                                                                                                                         | Data showing no difference                                                                                               | Data that favour shared room |
|------------------------------------|------------|------------------------------|------------|------------------------------|---------------------|-------------------|---------------|------------------------------------------------------------------------------------------------------------------------------------------------------------------------------------------------------------------------------------------------------------------------------------------------------------------------------------------------------------------------------------------------------|--------------------------------------------------------------------------------------------------------------------------|------------------------------|
|                                    |            |                              |            |                              |                     |                   |               | p<0.001, total skin-to-skin contact per day                                                                                                                                                                                                                                                                                                                                                          |                                                                                                                          |                              |
| Van Veenendaal 2022 <sup>138</sup> | 70%        | Netherlands                  | Neonates   | 182 parents, 3 hospitals     | Fathers of neonates | Emergency         | ICU           | p<0.001, p<0.001 <sup>a</sup> , total presence<br>p<0.001, p<0.001 <sup>a</sup> , presence >8 h<br>p<0.001, p=0.009 <sup>a</sup> , total participation<br>p<0.001, p=0.005 <sup>a</sup> , participation in medical care<br>p=0.23, p=0.04 <sup>a</sup> , information gathering<br>p<0.001, p=0.005 <sup>a</sup> , advocacy and leadership<br>p=0.006, p=0.005 <sup>a</sup> , time spent with neonate | p=0.04, p=0.13 <sup>a</sup> , participation in daily care<br>p=0.69, p=0.57 <sup>a</sup> , time spent comforting neonate |                              |
| <b>Evidence synthesis</b>          |            |                              |            |                              |                     |                   |               |                                                                                                                                                                                                                                                                                                                                                                                                      |                                                                                                                          |                              |
| Adamson 2003 <sup>1</sup>          | SLR 82%    | United States, International | Mixed      | Unclear                      | Mixed               | Mixed             | Mixed         | Interaction with family members and flexibility for accommodating family members                                                                                                                                                                                                                                                                                                                     |                                                                                                                          |                              |
| Dowdeswell 2004 <sup>31</sup>      | SLR 36%    | International                | Unclear    | Unclear                      | Mixed               | Mixed             | Mixed         | Qualitative (frequency of visitors, privacy)                                                                                                                                                                                                                                                                                                                                                         |                                                                                                                          |                              |
| OECD WHO 2019 <sup>92</sup>        | Report 14% | Europe                       | NR         | NR                           | Mixed               | Mixed             | Mixed         | p<0.05, social support<br>Communication with family                                                                                                                                                                                                                                                                                                                                                  |                                                                                                                          |                              |

| Citation                        | QA         | Location      | Population | Number of patients/hospitals | Patient type                       | Type of admission | Level of care | Data that favour single room                 | Data showing no difference                        | Data that favour shared room |
|---------------------------------|------------|---------------|------------|------------------------------|------------------------------------|-------------------|---------------|----------------------------------------------|---------------------------------------------------|------------------------------|
| Søndergaard 2022 <sup>118</sup> | SLR<br>91% | International | NR         | NR                           | Acute, Surgical, Internal medicine | Unclear           | Routine       | Quiet, private, better /easier communication |                                                   | Not isolated and not lonely  |
| Taylor 2018 <sup>129</sup>      | SLR<br>91% | International | NR         | NR                           | Mixed                              | Mixed             | Mixed         |                                              | All studies reported advantages and disadvantages |                              |

**Table 11. Summary of studies reporting patient's views on noise, disturbance and sleep**

| Citation                                                                      | QA   | Location       | Population | Number of patients/hospitals                                    | Patient type | Type of admission | Level of care | Data that favour single room                                      | Data showing no difference                                                                                              | Data that favour shared room |
|-------------------------------------------------------------------------------|------|----------------|------------|-----------------------------------------------------------------|--------------|-------------------|---------------|-------------------------------------------------------------------|-------------------------------------------------------------------------------------------------------------------------|------------------------------|
| <b>Before and after a hospital relocation plus Contemporaneous comparison</b> |      |                |            |                                                                 |              |                   |               |                                                                   |                                                                                                                         |                              |
| Maben 2016 <sup>77</sup>                                                      | 67%  | United Kingdom | Unclear    | 32 patients, 21 HCP, 1 hospital relocation, 2 control hospitals | Mixed        | Unclear           | Mixed         | Patient perceptions (comfort, noise levels, privacy)              |                                                                                                                         |                              |
| <b>Before and after a hospital relocation</b>                                 |      |                |            |                                                                 |              |                   |               |                                                                   |                                                                                                                         |                              |
| Carlson 2006 <sup>17</sup>                                                    | 33%  | United States  | Neonates   | Unclear, 1 hospital                                             | Neonates     | Emergency         | ICU           | Patient perceptions (noise levels)                                |                                                                                                                         |                              |
| Carter 2008 <sup>18</sup>                                                     | 33%  | United States  | Neonates   | 53 parents, 1 hospital                                          | Neonates     | Emergency         | NICU          | p<0.001, noise level<br>p<0.001, lighting                         |                                                                                                                         |                              |
| Davis 2019 <sup>25</sup>                                                      | 67%  | Australia      | Adults     | 1569 patients, 1 hospital relocation                            | Orthopaedic  | Elective          | Routine       | <i>Adequate sleep reported but no comparison with shared room</i> |                                                                                                                         |                              |
| Domanico 2010 <sup>28</sup>                                                   | 63%  | United States  | Neonates   | 161 caregivers, 1 hospital, 2 units                             | Paediatric   | NR                | NICU          | Actual noise levels                                               | Patient perceptions (noise levels)<br>p=0.890, noise disturbance (short stay)<br>p=0.657, noise disturbance (long stay) |                              |
| Ferri 2015 <sup>41</sup>                                                      | 100% | Canada         | Adults     | 39 HCPs (13 nurses, 7 respiratory therapists), 5 HCPS (other),  | Unclear      | Unclear           | ICU           | Qualitative (less disruption)                                     |                                                                                                                         |                              |

| Citation                   | QA  | Location       | Population | Number of patients/hospitals                                       | Patient type                 | Type of admission | Level of care | Data that favour single room                                                                                                                                 | Data showing no difference                                            | Data that favour shared room |
|----------------------------|-----|----------------|------------|--------------------------------------------------------------------|------------------------------|-------------------|---------------|--------------------------------------------------------------------------------------------------------------------------------------------------------------|-----------------------------------------------------------------------|------------------------------|
|                            |     |                |            | 6 physicians, 4 family members, 4 support staff, 1 hospital        |                              |                   |               |                                                                                                                                                              |                                                                       |                              |
| Florey 2009 <sup>42</sup>  | 44% | United Kingdom | Adults     | 80 patients, 2 hospitals, 1 Before and after move                  | Medical and surgical, Adults | Unclear           | Routine       | p=0.019, noise disturbance                                                                                                                                   |                                                                       |                              |
| Harris 2004 <sup>49</sup>  | 74% | Canada         | Adults     | 976 patients, 1 hospital, Before and after new unit established    | Pregnancy                    | Maternity         | Routine       | p<0.001, physicians' perceptions of noise                                                                                                                    |                                                                       |                              |
| Janssen 2000 <sup>56</sup> | 56% | Canada         | Adults     | 426 patients, 1 hospital, Before and after relocation              | Pregnant women               | Maternity         | Routine       | p<0.001, any noise disturbance<br>p<0.001, talking/visiting by hospital neighbours<br>p=0.08, staff talking at the nursing station<br>p<0.001, crying babies | p=0.30, talking/visiting by hospital staff<br>p=0.28, women in labour |                              |
| Maben 2015 <sup>76</sup>   | 78% | United Kingdom | Unclear    | 24 staff, 32 patients, 1 hospital (relocated), 2 control hospitals | All patients in hospital     | Mixed             | Mixed         | Patient perceived benefit                                                                                                                                    |                                                                       |                              |
| Milford 2008 <sup>84</sup> | 30% | United States  | Neonates   | Unclear, 1 hospital                                                | Neonates                     | Emergency         | ICU           | Higher staff satisfaction                                                                                                                                    |                                                                       |                              |
| Pyrke 2017 <sup>103</sup>  | 59% | Canada         | Adults     | 47 patients, 1 hospital relocation                                 | Psychiatric                  | Emergency         | Routine       |                                                                                                                                                              | p=0.399, sleep disturbed<br>p=0.065, time spent asleep                |                              |



| Citation                          | QA  | Location      | Population | Number of patients/hospitals                         | Patient type    | Type of admission | Level of care | Data that favour single room                                                                                                                                                                                            | Data showing no difference                                                                                                                                       | Data that favour shared room                                                             |
|-----------------------------------|-----|---------------|------------|------------------------------------------------------|-----------------|-------------------|---------------|-------------------------------------------------------------------------------------------------------------------------------------------------------------------------------------------------------------------------|------------------------------------------------------------------------------------------------------------------------------------------------------------------|------------------------------------------------------------------------------------------|
| Real 2018 <sup>105</sup>          | 56% | United States | Unclear    | 111 patients, 77 nurses, 1 hospital, 1 ward          | Cardio-vascular | Unclear           | ICU, Routine  | Perceived noise level                                                                                                                                                                                                   |                                                                                                                                                                  |                                                                                          |
| Stevens 2011 <sup>121</sup>       | 52% | United States | Neonates   | 147 patients, 1 hospital Before and after relocation | Neonates        | Emergency         | ICU           | Restfulness                                                                                                                                                                                                             |                                                                                                                                                                  |                                                                                          |
| Stevens 2012 <sup>122</sup>       | 44% | United States | Neonates   | 73 patients, 1 hospital Before and after relocation  | Neonates        | Emergency         | ICU           | p<0.001, actual noise level<br>p<0.05, lighting                                                                                                                                                                         | Noise level adjacent to baby's ear                                                                                                                               |                                                                                          |
| Van Enk 2011 <sup>136</sup>       | 44% | United States | Neonates   | 90 beds, 1 hospital                                  | Neonates        | Emergency         | NICU          | p=0.04, actual noise level (day time)<br>p=0.05, less illumination (day time)<br>p=0.01, lower temperature (night time)<br>p=0.001, lower temperature (day and night combined)<br>p<0.0001, lower humidity (night time) | p=0.35, actual noise level (night time)<br>p=0.08, actual noise level (day or night time)<br>p=0.49, illumination (night time)<br>p=0.60, temperature (day time) | p<0.0001, lower humidity (day time)<br>p<0.0001, lower humidity (day and night combined) |
| Walsh 2006 <sup>142</sup>         | 33% | Unclear       | Neonates   | 127 nurses, 1 hospital                               | Neonates        | Emergency         | NICU          | Actual noise levels                                                                                                                                                                                                     |                                                                                                                                                                  |                                                                                          |
| <b>Contemporaneous comparison</b> |     |               |            |                                                      |                 |                   |               |                                                                                                                                                                                                                         |                                                                                                                                                                  |                                                                                          |

| Citation                            | QA  | Location       | Population      | Number of patients/hospitals                   | Patient type                               | Type of admission | Level of care | Data that favour single room                                                                                           | Data showing no difference                                                    | Data that favour shared room                                            |
|-------------------------------------|-----|----------------|-----------------|------------------------------------------------|--------------------------------------------|-------------------|---------------|------------------------------------------------------------------------------------------------------------------------|-------------------------------------------------------------------------------|-------------------------------------------------------------------------|
| Apple 2014 <sup>4</sup>             | 52% | Sweden         | Unclear         | 81 HCP, 3 ICUs                                 | Mixed                                      | Unclear           | ICU           | Qualitative (privacy, fewer disturbances)                                                                              |                                                                               |                                                                         |
| Bevan 2016 <sup>5</sup>             | 59% | United Kingdom | Adults, elderly | 50 patients, 2 hospitals                       | Acute illness                              | Emergency         | Routine       | Qualitative (less noise disturbance)                                                                                   |                                                                               |                                                                         |
| Bodack 2016 <sup>10</sup>           | 56% | Germany        | Neonates        | 35 pairs of parents of 40 neonates, 1 hospital | Neonates                                   | Emergency         | ICU           | Qualitative (fewer disturbances)                                                                                       |                                                                               |                                                                         |
| Deitrick 2010 <sup>26</sup>         | 90% | United States  | Adults          | 24 patients, 29 HCP, 2 hospitals, 2 wards      | Orthopaedic, Neurological, Surgical        | Unclear           | Routine       |                                                                                                                        |                                                                               | Qualitative (adequate rest and sleep due to the presence of a roommate) |
| Douglas 2005 <sup>30</sup>          | 90% | United Kingdom | Unclear         | 785 patients (post discharge), 1 hospital      | Surgical, Acute care, Maternity, Geriatric | Unclear           | Routine       | Fewer night-time disturbances                                                                                          |                                                                               |                                                                         |
| Eberhard-Gran 2000 <sup>33</sup>    | 59% | Norway         | Adults          | 160 patients, Unclear (one municipality)       | Adults, Pregnant women                     | Maternity         | Routine       | More sleep/ rest<br>Enough sleep/ rest (women ≥ 30 years old)<br>OR 8.1, 1.7-39.3 amount of sleep and rest at Akershus | Enough sleep/rest<br>OR 2.9, 0.3-30.3 amount of sleep and rest at Kongsvinger |                                                                         |
| Edéll-Gustafsson 2015 <sup>34</sup> | 90% | Sweden         | Neonates        | 12 parents, 1 unit                             | Neonates                                   | Emergency         | ICU           | Qualitative (privacy, personal control)                                                                                |                                                                               | Qualitative (not confined)                                              |
| Ehrlander 2009 <sup>35</sup>        | 78% | United States  | Adults          | 117 patients, 1 hospital                       | Adults                                     | Unclear           | Routine       | Qualitative (peace and quiet)                                                                                          |                                                                               |                                                                         |

| Citation                    | QA  | Location       | Population      | Number of patients/hospitals                    | Patient type                                          | Type of admission | Level of care | Data that favour single room                                                                                                          | Data showing no difference                                                                                                 | Data that favour shared room               |
|-----------------------------|-----|----------------|-----------------|-------------------------------------------------|-------------------------------------------------------|-------------------|---------------|---------------------------------------------------------------------------------------------------------------------------------------|----------------------------------------------------------------------------------------------------------------------------|--------------------------------------------|
| Foo 2022 <sup>43</sup>      | 74% | Australia      | Adults          | 60 patients, 1 hospital                         | Cardio-respiratory, Obstetric, Sleep disorders, Other | Unclear           | Routine       |                                                                                                                                       | p>0.05, number of interruptions in 24-h<br>p>0.05, number of disturbances at night<br>p=0.11, other measures of discomfort |                                            |
| Harris 2006 <sup>51</sup>   | 52% | United States  | Neonates        | 21 parents, 75 HCPs                             | Neonates                                              | Maternity         | ICU           | Parent satisfaction with physical environment                                                                                         |                                                                                                                            |                                            |
| Hosseini 2017 <sup>52</sup> | 63% | Iran           | Adults          | 132 patients, 2 hospitals                       | Medical, surgical                                     | Unclear           | Routine       |                                                                                                                                       |                                                                                                                            | p<0.001, better scores for sleep disorders |
| Meyer 1994 <sup>83</sup>    | 59% | United States  | Unclear         | Unclear, 1 hospital                             | Mixed                                                 | Mixed             | Mixed         | p<0.05, actual noise levels (day time)<br>p<0.05, actual noise levels (night time)<br>lower maximum illumination (day and night time) | Maximum period of uninterrupted sleep                                                                                      |                                            |
| Morgan 2010 <sup>87</sup>   | 44% | UK, US         | Children        | 146 patients, 114 HCP, 2 hospitals              | Children                                              | Mixed             | Routine       | Qualitative (quiet sleep)                                                                                                             |                                                                                                                            |                                            |
| Nahas 2016 <sup>89</sup>    | 56% | United Kingdom | Adults, Elderly | 60 patients, 2 hospitals                        | Orthopaedic (elective hip/knee arthroplasty)          | Elective          | Routine       | p=0.003, good sleep at night                                                                                                          | p=0.127, noise level                                                                                                       |                                            |
| Nassery 2019 <sup>91</sup>  | 90% | Sweden         | Children        | 13 interviews (9 individual parents, 4 pairs of | Children                                              | Unclear           | Mixed         | Less stress sleeping alone                                                                                                            |                                                                                                                            |                                            |

| Citation                      | QA   | Location       | Population      | Number of patients/hospitals                  | Patient type                | Type of admission | Level of care | Data that favour single room                                           | Data showing no difference                                                      | Data that favour shared room                             |
|-------------------------------|------|----------------|-----------------|-----------------------------------------------|-----------------------------|-------------------|---------------|------------------------------------------------------------------------|---------------------------------------------------------------------------------|----------------------------------------------------------|
|                               |      |                |                 | parents), 1 hospital                          |                             |                   |               |                                                                        |                                                                                 |                                                          |
| Olson 1992 <sup>93</sup>      | 52%  | United States  | Adults          | 351 patients, 28 HCP, 1 hospital              | Pregnant women              | Maternity         | Routine       | <i>Mothers satisfied with room but no comparison with shared rooms</i> |                                                                                 |                                                          |
| Persson 2012 <sup>97</sup>    | 90%  | Sweden         | Adults, Elderly | 16 patients, 10 nurses<br>1 hospital, 2 wards | Orthopaedic, Surgical       | Unclear           | Routine       | Less disturbance                                                       |                                                                                 |                                                          |
| Persson 2015 <sup>98</sup>    | 90%  | Sweden         | Adults          | 16 patients, 1 hospital                       | Surgical                    | Unclear           | Routine       | Sleep undisturbed                                                      |                                                                                 |                                                          |
| Poncette 2021 <sup>101</sup>  | 56%  | Germany        | Unclear         | 21 beds, 1 hospital                           | Unclear                     | Unclear           | ICU           |                                                                        |                                                                                 | Less alarms raised                                       |
| Rowlands 2008 <sup>110</sup>  | 90%  | United Kingdom | Adults          | 12 patients, 1 hospital                       | Adults with advanced cancer | Unclear           | Routine       | Qualitative (less stress related to disturbing others)                 |                                                                                 |                                                          |
| Sakr 2021 <sup>113</sup>      | 74%  | Lebanon        | Adults          | 75 patients, 1 hospital                       | Internal medicine, Surgical | Mixed             | Routine       | p=0.011, fewer cases of new onset insomnia                             | p=0.272, patient perceived impact of room on new onset insomnia                 |                                                          |
| Stelwagen 2021 <sup>120</sup> | 100% | Netherlands    | Neonates        | 36 parents, 1 hospital                        | Neonates                    | Emergency         | ICU           | Qualitative (privacy)                                                  |                                                                                 | Qualitative (less surprise when staff appear at bedside) |
| Tegnstedt 2013 <sup>130</sup> | 70%  | Sweden         | Adults, Elderly | 15 patients<br>1 hospital                     | Adults                      | Emergency         | ICU           |                                                                        | p=0.777 (7am to 3pm), p=0.885(3pm to 11pm), p=0.832 (11pm to 7am), actual noise |                                                          |



| Citation                        | QA            | Location      | Population   | Number of patients/hospitals | Patient type                       | Type of admission | Level of care | Data that favour single room                      | Data showing no difference       | Data that favour shared room      |
|---------------------------------|---------------|---------------|--------------|------------------------------|------------------------------------|-------------------|---------------|---------------------------------------------------|----------------------------------|-----------------------------------|
| Zaal 2013 <sup>145</sup>        | 67%           | Netherlands   | Older Adults | 156 patients<br>1 hospital   | Older Adults with dementia         | Mixed             | ICU           |                                                   |                                  | p <0.001<br>lower light intensity |
| <b>Evidence synthesis</b>       |               |               |              |                              |                                    |                   |               |                                                   |                                  |                                   |
| Dowdeswell 2004 <sup>31</sup>   | SLR<br>36%    | International | Unclear      | Unclear                      | Mixed                              | Mixed             | Mixed         | Quieter (less sleep disturbance, better outcomes) |                                  |                                   |
| OECD WHO 2019 <sup>92</sup>     | Report<br>14% | Europe        | NR           | NR                           | Mixed                              | Mixed             | Mixed         | p<0.05, better sleep                              |                                  |                                   |
| Søndergaard 2022 <sup>118</sup> | SLR<br>91%    | International | NR           | NR                           | Acute, Surgical, Internal medicine | Unclear           | Routine       | Quieter (less sleep disturbance)                  |                                  |                                   |
| Taylor 2018 <sup>129</sup>      | SLR<br>91%    | International | NR           | NR                           | Mixed                              | Mixed             | Mixed         |                                                   | Mixed findings on sleep outcomes |                                   |

**Table 12. Summary of studies reporting patients' views on satisfaction with care**

| Citation                                                                      | QA  | Location       | Population | Number of patients/hospitals                                    | Patient type                 | Type of admission | Level of care | Data that favour single room                                                                 | Data showing no difference                                   | Data that favour shared room                                   |
|-------------------------------------------------------------------------------|-----|----------------|------------|-----------------------------------------------------------------|------------------------------|-------------------|---------------|----------------------------------------------------------------------------------------------|--------------------------------------------------------------|----------------------------------------------------------------|
| <b>Before and after a hospital relocation plus Contemporaneous comparison</b> |     |                |            |                                                                 |                              |                   |               |                                                                                              |                                                              |                                                                |
| Maben 2016 <sup>77</sup>                                                      | 67% | United Kingdom | Unclear    | 32 patients, 21 HCP, 1 hospital relocation, 2 control hospitals | Mixed                        | Unclear           | Mixed         | Patient preference (privacy, ensuite)                                                        |                                                              | Patient preference (social interaction)                        |
| <b>Before and after a hospital relocation</b>                                 |     |                |            |                                                                 |                              |                   |               |                                                                                              |                                                              |                                                                |
| Campbell-Yeo 2021 <sup>15</sup>                                               | 74% | Canada         | Neonates   | 71 mothers, 2 wards                                             | Neonates                     | Emergency         | ICU           | Postpartum depression scores<br>Post-traumatic stress disorder scores                        | Parental stressor scores<br>EQ-5D-5L self-reported health    | Perceived maternal self-efficacy<br>Intolerance of uncertainty |
| Carlson 2006 <sup>17</sup>                                                    | 33% | United States  | Neonates   | 1 hospital, Patients unclear                                    | Neonates                     | Emergency         | ICU           | Patient perception (improved lighting control)                                               |                                                              |                                                                |
| Carter 2008 <sup>18</sup>                                                     | 33% | United States  | Neonates   | 53 parents, 1 hospital Before and after relocation              | Neonates                     | Emergency         | NICU          | p<0.001 parent perceptions of security                                                       |                                                              |                                                                |
| Davis 2019 <sup>25</sup>                                                      | 67% | Australia      | Adults     | 1569 patients, 1 hospital relocation                            | Orthopaedic                  | Elective          | Routine       | Patient satisfaction but no comparison with shared room                                      |                                                              |                                                                |
| Florey 2009 <sup>42</sup>                                                     | 44% | United Kingdom | Adults     | 80 patients, 2 hospitals, 1 Before and after move               | Medical and surgical, Adults | Unclear           | Routine       |                                                                                              | patient preference based on previous experience inconclusive |                                                                |
| Janssen 2000 <sup>56</sup>                                                    | 56% | Canada         | Adults     | 426 patients, 1 hospital                                        | Pregnant women               | Maternity         | Routine       | p<0.001, patient opinions in care considered<br>p<0.001, information given to inform choices |                                                              |                                                                |

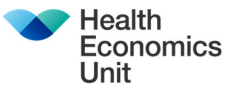

| Citation                     | QA  | Location    | Population | Number of patients/hospitals                             | Patient type                 | Type of admission | Level of care | Data that favour single room                                                                                                                                                                       | Data showing no difference                                                                                                                                                                           | Data that favour shared room |
|------------------------------|-----|-------------|------------|----------------------------------------------------------|------------------------------|-------------------|---------------|----------------------------------------------------------------------------------------------------------------------------------------------------------------------------------------------------|------------------------------------------------------------------------------------------------------------------------------------------------------------------------------------------------------|------------------------------|
|                              |     |             |            |                                                          |                              |                   |               | p<0.001, patient choices supporter by caregivers<br>p<0.001, assistance given to support person<br>p<0.001, comfort measures for labour pain<br><br>p<0.001, comfort measures for pain after birth |                                                                                                                                                                                                      |                              |
| Jongerden 2013 <sup>59</sup> | 67% | Netherlands | Adults     | 387 patients, 323 completed surveys, 1 hospital          | Mixed, Adults                | Mixed             | ICU           | p=0.02, overall family satisfaction<br>p=0.007, family satisfaction with care<br>p=0.02, overall patient satisfaction<br>p=0.01, patient satisfaction with care                                    | p=0.12, family satisfaction with decision making<br>p=0.21, patient satisfaction with decision making                                                                                                |                              |
| Kainiemi 2021 <sup>63</sup>  | 59% | Finland     | Neonates   | 61 families, 1 hospital, 1 unit (pre-post-restructuring) | Pre-term infants (<35 weeks) | Unclear           | NICU          |                                                                                                                                                                                                    | Patient perceptions: (mothers and fathers, respectively)<br>p=0.19, p=0.33, overall scores<br>p=0.11, p=0.94, extent staff listen to mothers/fathers<br>p=0.24, p=0.18, participation in baby's care |                              |



| Citation                  | QA  | Location       | Population | Number of patients/hospitals       | Patient type                | Type of admission | Level of care | Data that favour single room                                                                                            | Data showing no difference                                                                                                                                                                                                                                                                                                                                                                                 | Data that favour shared room |
|---------------------------|-----|----------------|------------|------------------------------------|-----------------------------|-------------------|---------------|-------------------------------------------------------------------------------------------------------------------------|------------------------------------------------------------------------------------------------------------------------------------------------------------------------------------------------------------------------------------------------------------------------------------------------------------------------------------------------------------------------------------------------------------|------------------------------|
|                           |     |                |            |                                    |                             |                   |               |                                                                                                                         | p=0.09, p=0.45, guidance provided by staff met needs p=0.71, p=0.16, opinion considered regarding care of baby p=0.51, p=0.16, mothers/fathers trust in staff caring for baby p=0.28, p=0.92, staff trust in mothers/fathers caring for baby p=0.12, p=0.89, participation in discussions during rounds p=0.51, p=0.41, information given by staff met needs p=0.70, p=0.87, staff offer emotional support |                              |
| Lawson 2000 <sup>69</sup> | 41% | United Kingdom | Adults     | 424 patients, 2 hospitals, 4 wards | Psychiatric and Orthopaedic | Unclear           | Routine       | Patient perceptions (spatially, visually)                                                                               |                                                                                                                                                                                                                                                                                                                                                                                                            |                              |
| Lester 2014 <sup>72</sup> | 63% | United States  | Neonates   | 403 patients, 1 hospital           | Neonates                    | Emergency         | ICU           | p<0.001, mother's overall satisfaction p<0.0001, mother's stress p<0.001 mother's satisfaction with family-centred care |                                                                                                                                                                                                                                                                                                                                                                                                            |                              |



| Citation                    | QA  | Location       | Population       | Number of patients/hospitals                | Patient type    | Type of admission | Level of care | Data that favour single room                                                                                                                                                   | Data showing no difference | Data that favour shared room |
|-----------------------------|-----|----------------|------------------|---------------------------------------------|-----------------|-------------------|---------------|--------------------------------------------------------------------------------------------------------------------------------------------------------------------------------|----------------------------|------------------------------|
|                             |     |                |                  |                                             |                 |                   |               | p<0.0001 mother's involvement in infant care                                                                                                                                   |                            |                              |
| Milford 2008 <sup>84</sup>  | 30% | United States  | Neonates         | No. of patients unclear, 1 hospital         | Neonates        | Emergency         | ICU           | Positive staff perceptions                                                                                                                                                     |                            |                              |
| Real 2018 <sup>105</sup>    | 56% | United States  | Unclear          | 111 patients, 77 nurses, 1 hospital, 1 ward | Cardio-vascular | Unclear           | ICU, Routine  | p<0.05, patients' satisfaction with design                                                                                                                                     |                            |                              |
| Reid 2015 <sup>107</sup>    | 48% | United Kingdom | Adult, Elderly   | 89 patients, 1 hospital relocation          | Geriatric       | Rehabilitation    | Routine       | 100% patients prefer private toilet<br><i>84.8% of patients in single rooms would prefer single rooms</i><br><i>37.2% of patients in shared room would prefer single rooms</i> |                            |                              |
| Stevens 2011 <sup>121</sup> | 52% | United States  | Neonates         | 147 patients, 1 hospital                    | Neonates        | Emergency         | ICU           | p<0.001, parent satisfaction with environment<br>p=0.018, overall parent satisfaction<br>p=0.04, total parent satisfaction score                                               |                            |                              |
| Swanson 2013 <sup>125</sup> | 37% | United States  | Neonates, Carers | 55 parents, 1 hospital                      | Neonates        | Emergency         | NICU          | p<0.05, nurse perception of facilities<br>p<0.05, practitioners' perceptions of facilities                                                                                     |                            |                              |

| Citation                          | QA  | Location       | Population      | Number of patients/hospitals                 | Patient type                               | Type of admission | Level of care | Data that favour single room                                                                                | Data showing no difference                                                           | Data that favour shared room |
|-----------------------------------|-----|----------------|-----------------|----------------------------------------------|--------------------------------------------|-------------------|---------------|-------------------------------------------------------------------------------------------------------------|--------------------------------------------------------------------------------------|------------------------------|
|                                   |     |                |                 |                                              |                                            |                   |               | p<0.05, parents' perceptions of facilities                                                                  |                                                                                      |                              |
| <b>Contemporaneous comparison</b> |     |                |                 |                                              |                                            |                   |               |                                                                                                             |                                                                                      |                              |
| Bevan 2016 <sup>5</sup>           | 59% | United Kingdom | Adults, Elderly | 50 patients, 2 hospitals                     | Acute illness                              | Emergency         | Routine       | Qualitative (privacy, personal control, private toilet)<br>p=0.038, patients perceived a high-level of care |                                                                                      |                              |
| Boztepe 2017 <sup>12</sup>        | 63% | Turkey         | Children        | 130 patients, 1 hospital, 1 ward             | Children                                   | Mixed             | Routine       |                                                                                                             | Only 15.4% expected a large or single room                                           |                              |
| Deitrick 2010 <sup>26</sup>       | 90% | United States  | Adults          | 24 patients, 29 HCP, 2 hospitals, 2 wards    | Orthopaedic, Neurological, Surgical        | Unclear           | Routine       | Patient preference (privacy)                                                                                |                                                                                      |                              |
| de Matos 2020 <sup>27</sup>       | 63% | Brazil         | Unclear         | 176 family visitors, 1 hospital, 4 ICU units | Cancer                                     | Unclear           | ICU           | p=0.02, patient satisfaction<br>Satisfaction of family members                                              |                                                                                      |                              |
| Douglas 2005 <sup>30</sup>        | 90% | United Kingdom | Unclear         | 785 patients (post discharge), 1 hospital    | Surgical, Acute care, Maternity, Geriatric | Unclear           | Routine       | Patient satisfaction with needs met                                                                         |                                                                                      |                              |
| Eberhard-Gran 2000 <sup>33</sup>  | 59% | Norway         | Adults          | 160 patients, Unclear (one municipality)     | Adults, Pregnant women                     | Maternity         | Routine       | OR <sup>a</sup> 18, 2.2-149.1 more likely to be satisfied with care                                         | Satisfaction with rooms<br>Satisfaction with sleep and rest<br>Satisfaction with LOS |                              |
| Ehrlander 2009 <sup>35</sup>      | 78% | United States  | Adults          | 117 patients, 1 hospital                     | Adults                                     | Unclear           | Routine       | Patient preference                                                                                          | p=0.309, fear of dying                                                               |                              |

| Citation                    | QA  | Location      | Population       | Number of patients/hospitals                         | Patient type      | Type of admission | Level of care | Data that favour single room                                                                                                                     | Data showing no difference                                                                                                      | Data that favour shared room |
|-----------------------------|-----|---------------|------------------|------------------------------------------------------|-------------------|-------------------|---------------|--------------------------------------------------------------------------------------------------------------------------------------------------|---------------------------------------------------------------------------------------------------------------------------------|------------------------------|
| Erdeve 2009 <sup>37</sup>   | 78% | Turkey        | Adults, Neonates | 60 infants, 49 mothers, 2 hospitals                  | Preterm neonates  | Emergency         | NICU          |                                                                                                                                                  | p=0.206, depression scores p=0.06, postpartum depression rate p=0.161, vulnerable child scores p=0.219, parenting stress scores |                              |
| Harris 2006 <sup>50</sup>   | 63% | United States | Neonates         | 75 HCP, 21 parents, 5 NICU units (SFR=2, open bay=3) | Neonates          | Unclear           | Level 3, NICU | p<0.05, window view and proximity to infant during sleep<br>Less stressful and less depressing                                                   |                                                                                                                                 |                              |
| Harris 2006 <sup>51</sup>   | 52% | United States | Neonates         | 21 parents, 75 HCPs                                  | Neonates          | Maternity         | ICU           | Less stressful and less depressing, better physical environment.                                                                                 |                                                                                                                                 |                              |
| Hosseini 2017 <sup>52</sup> | 63% | Iran          | Adults           | 132 patients, 2 hospitals                            | Medical, Surgical | Unclear           | Routine       | p<0.001, patients' overall satisfaction<br>p<0.001, patients' total satisfaction                                                                 |                                                                                                                                 |                              |
| Janssen 2006 <sup>57</sup>  | 59% | Canada        | Adults           | 415 patients, 1 hospital, 2 wards                    | Pregnant women    | Maternity         | Routine       | p<0.001, patients' overall satisfaction<br>p<0.001, confidence in neonatal care<br>p<0.001, provision of choice<br>p<0.001, physical environment |                                                                                                                                 |                              |
| Labarère 2004 <sup>68</sup> | 70% | France        | Adults           | 4095 patients, 1 hospital                            | Mixed             | Mixed             | Mixed         | p<0.01, overall patient experience                                                                                                               |                                                                                                                                 |                              |

| Citation                   | QA  | Location       | Population          | Number of patients/hospitals                    | Patient type                                 | Type of admission | Level of care | Data that favour single room                                                                                                                                                                                                                                                                                | Data showing no difference                                     | Data that favour shared room                                                                                                                                                                                                                                             |
|----------------------------|-----|----------------|---------------------|-------------------------------------------------|----------------------------------------------|-------------------|---------------|-------------------------------------------------------------------------------------------------------------------------------------------------------------------------------------------------------------------------------------------------------------------------------------------------------------|----------------------------------------------------------------|--------------------------------------------------------------------------------------------------------------------------------------------------------------------------------------------------------------------------------------------------------------------------|
| Miller 1998 <sup>85</sup>  | 59% | United States  | Adolescents, Adults | 94 patients, 1 hospital                         | Inpatients, Outpatients                      | Unclear           | Routine       | % patients overall stating ideal rooming arrangements<br>% inpatients stating ideal rooming arrangements<br>% female inpatients stating ideal rooming arrangements<br>% inpatients aged 15 to 17 and 18 to 21 stating ideal rooming arrangements<br>% female outpatients stating ideal rooming arrangements | % outpatients aged 12 to 14 stating ideal rooming arrangements | % male inpatients and outpatients stating ideal rooming arrangements<br>% inpatients aged 12 to 14 stating ideal rooming arrangements<br>% outpatients stating ideal rooming arrangements<br>% outpatients aged 15 to 17 and 18 to 21 stating ideal rooming arrangements |
| Morgan 2010 <sup>87</sup>  | 44% | UK, US         | Children            | 146 patients, 114 HCP, 2 hospitals              | Children                                     | Mixed             | Routine       |                                                                                                                                                                                                                                                                                                             |                                                                | % patient preference                                                                                                                                                                                                                                                     |
| Nahas 2016 <sup>89</sup>   | 56% | United Kingdom | Adults, Elderly     | 60 patients, 2 hospitals                        | Orthopaedic (elective hip/knee arthroplasty) | Elective          | Routine       | $p=0.014$ , feeling of safety<br>Qualitative (privacy, security, pain management, cleanliness)                                                                                                                                                                                                              | $p=0.061$ , overall patient satisfaction                       |                                                                                                                                                                                                                                                                          |
| Nash 2021 <sup>90</sup>    | 63% | Australia      | Adults              | 602 patients, 4 hospitals                       | Unclear                                      | Unclear           | Routine       |                                                                                                                                                                                                                                                                                                             |                                                                | Patient preference                                                                                                                                                                                                                                                       |
| Nassery 2019 <sup>91</sup> | 90% | Sweden         | Children            | 13 interviews (9 individual parents, 4 pairs of | Children                                     | Unclear           | Mixed         | Parents preference                                                                                                                                                                                                                                                                                          |                                                                |                                                                                                                                                                                                                                                                          |

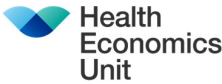

| Citation                   | QA  | Location       | Population      | Number of patients/hospitals                | Patient type                           | Type of admission  | Level of care | Data that favour single room                   | Data showing no difference                                                                                                                                                                                                            | Data that favour shared room                  |
|----------------------------|-----|----------------|-----------------|---------------------------------------------|----------------------------------------|--------------------|---------------|------------------------------------------------|---------------------------------------------------------------------------------------------------------------------------------------------------------------------------------------------------------------------------------------|-----------------------------------------------|
|                            |     |                |                 | parents), 1 hospital                        |                                        |                    |               |                                                |                                                                                                                                                                                                                                       |                                               |
| Olson 1992 <sup>93</sup>   | 52% | United States  | Adults          | 351 patients, 28 HCP, 1 hospital            | Pregnant women                         | Maternity          | Routine       | Nurse preference<br><i>Mother satisfaction</i> |                                                                                                                                                                                                                                       |                                               |
| Pease 2002 <sup>96</sup>   | 48% | United Kingdom | Unclear         | 50 patients, 1 hospital                     | Oncologic, Terminal                    | Unclear            | Routine       | Family preference                              |                                                                                                                                                                                                                                       | Patient preference                            |
| Persson 2012 <sup>97</sup> | 90% | Sweden         | Adults, Elderly | 16 patients, 10 nurses, 1 hospital, 2 wards | Orthopaedic, Surgical                  | Unclear            | Routine       |                                                |                                                                                                                                                                                                                                       | Qualitative (security and safety)             |
| Persson 2015 <sup>98</sup> | 90% | Sweden         | Adults          | 16 patients, 1 hospital                     | Surgical                               | Unclear            | Routine       |                                                |                                                                                                                                                                                                                                       | Qualitative (security, company, not isolated) |
| Pineda 2012 <sup>100</sup> | 70% | United States  | Neonates        | 81 patients, 1 hospital                     | Premature neonates                     | Emergency          | NICU          |                                                | p=0.512, maternal depression<br>p=0.152, trait anxiety<br>p=0.830, state anxiety<br>p=0.071, life stress<br>p=0.603, avoidance coping<br>p=0.967, emotion-oriented coping<br>p=0.506, task-oriented coping<br>p=0.951, social support | p=0.040 <sup>a</sup> , stress levels          |
| Roos 2020 <sup>108</sup>   | 90% | Norway         | Adults          | 39 patients, 1 hospital relocation          | Internal medicine, Surgical, Maternity | Maternity, Unclear | Routine       |                                                |                                                                                                                                                                                                                                       | Satisfaction for older/bedridden patients     |

| Citation                      | QA   | Location       | Population | Number of patients/hospitals                       | Patient type                | Type of admission | Level of care | Data that favour single room                                                                                                                                                                                                                                                                                                                                | Data showing no difference                                                                                                                                                                                                                                                                                                                                                                                    | Data that favour shared room |
|-------------------------------|------|----------------|------------|----------------------------------------------------|-----------------------------|-------------------|---------------|-------------------------------------------------------------------------------------------------------------------------------------------------------------------------------------------------------------------------------------------------------------------------------------------------------------------------------------------------------------|---------------------------------------------------------------------------------------------------------------------------------------------------------------------------------------------------------------------------------------------------------------------------------------------------------------------------------------------------------------------------------------------------------------|------------------------------|
| Rowlands 2008 <sup>110</sup>  | 90%  | United Kingdom | Adults     | 12 patients, 1 hospital                            | Adults with advanced cancer | Unclear           | Routine       |                                                                                                                                                                                                                                                                                                                                                             | Qualitative (desire for choice of room)                                                                                                                                                                                                                                                                                                                                                                       |                              |
| Stelwagen 2021 <sup>120</sup> | 100% | Netherlands    | Neonates   | 36 parents, 1 hospital Before and after relocation | Neonates                    | Emergency         | ICU           | Qualitative (privacy, safety, homeliness, feelings of central engagement with child care)                                                                                                                                                                                                                                                                   |                                                                                                                                                                                                                                                                                                                                                                                                               |                              |
| Tandberg 2019 <sup>127</sup>  | 67%  | Norway         | Infants    | 77 infants, 132 parents, 2 hospitals               | Infants                     | Emergency         | ICU           | <p>Mothers:<br/>p=0.005, depression at day 14<br/>p=0.04, anxiety at day 14<br/>p=0.0001, role alteration at day 14<br/>p=0.06, role alteration at discharge</p> <p>Fathers:<br/>p=0.06, environmental stress at day 14<br/>p=0.003, role alteration at day 14<br/>p=0.003, environmental stress at discharge<br/>p=0.004, role alteration at discharge</p> | <p>Mothers:<br/>p=0.12<br/>Maternal distress at day 14<br/>p=0.43 depression, and p=0.48, anxiety at discharge<br/>p=0.13, distress at discharge<br/>p=0.65, depression and p=0.54, anxiety at 4-month corrected age<br/>p=0.60, distress at 4-month corrected age<br/>p=0.62, dysfunctional interaction with child<br/>p=0.23, perceived child to be difficult<br/>p=0.42, stress<br/>p=0.51, attachment</p> |                              |



| Citation                           | QA  | Location    | Population | Number of patients/hospitals | Patient type        | Type of admission | Level of care | Data that favour single room                                                                                                                        | Data showing no difference                                                                                                                                                                                                                                                                           | Data that favour shared room |
|------------------------------------|-----|-------------|------------|------------------------------|---------------------|-------------------|---------------|-----------------------------------------------------------------------------------------------------------------------------------------------------|------------------------------------------------------------------------------------------------------------------------------------------------------------------------------------------------------------------------------------------------------------------------------------------------------|------------------------------|
|                                    |     |             |            |                              |                     |                   |               |                                                                                                                                                     | Fathers: p=0.17, depression and p=0.25, anxiety at day 14 p=0.57, depression and p=0.73, anxiety at discharge p=0.92, depression and p=0.11, anxiety at 4-month corrected age p=0.16, dysfunctional interaction with child p=0.77, perceived child to be difficult p=0.68, stress p=0.49, attachment |                              |
| Van Veenendaal 2022 <sup>138</sup> | 70% | Netherlands | Neonates   | 182 parents, 3 hospitals     | Fathers of neonates | Emergency         | ICU           | p=0.001 <sup>a</sup> , stress overall p=0.011 <sup>a</sup> , stress related to environment p<0.001 <sup>a</sup> , stress related to role alteration | p=0.83 <sup>a</sup> , depression and anxiety p=0.26 <sup>a</sup> , self-efficacy p=0.27 <sup>a</sup> , impaired parent-newborn bonding p=0.32, satisfaction with care                                                                                                                                |                              |
| Watson 2014 <sup>144</sup>         | 44% | Canada      | Neonates   | 85 families, 1 hospital      | Neonates            | Emergency         | NICU          | p=0.008, privacy p=0.0001, comfort p=0.009, interaction with other families                                                                         | p=0.05, getting to know baby p=0.05, feeling irritable, anxious, depressed or sad                                                                                                                                                                                                                    |                              |

| Citation                          | QA         | Location      | Population | Number of patients/hospitals | Patient type                             | Type of admission | Level of care | Data that favour single room                                                                                        | Data showing no difference                            | Data that favour shared room                                             |
|-----------------------------------|------------|---------------|------------|------------------------------|------------------------------------------|-------------------|---------------|---------------------------------------------------------------------------------------------------------------------|-------------------------------------------------------|--------------------------------------------------------------------------|
|                                   |            |               |            |                              |                                          |                   |               | p=0.04. confidence feeding baby<br>p=0.04, easy to comfort baby<br>p=0.003, family adjusted to having the baby home | p=0.05, satisfied with care baby received             |                                                                          |
| <b>Economic analysis</b>          |            |               |            |                              |                                          |                   |               |                                                                                                                     |                                                       |                                                                          |
| Boardman 2011 <sup>8</sup>        | 91%        | Canada        | Unclear    | 537 beds, 1 hospital         | Mixed                                    | Mixed             | Mixed         | Patients and willingness to pay for single over shared rooms                                                        |                                                       |                                                                          |
| <b>Evidence synthesis</b>         |            |               |            |                              |                                          |                   |               |                                                                                                                     |                                                       |                                                                          |
| Bradbury-Jones 2013 <sup>14</sup> | SLR 86%    | International | Adults     | NR                           | Mixed, Vulnerable, Learning difficulties | Unclear           | Unclear       |                                                                                                                     | Mixed views among patients with learning disabilities |                                                                          |
| Dowdeswell 2004 <sup>31</sup>     | SLR 36%    | International | Unclear    | Unclear                      | Mixed                                    | Mixed             | Mixed         | Quicker mobility recovery<br>Sense of self-reliance<br>Personal control leads to happier patients.                  |                                                       |                                                                          |
| OECD WHO 2019 <sup>92</sup>       | Report 14% | Europe        | NR         | NR                           | Mixed                                    | Mixed             | Mixed         | 12 studies showed single rooms positively affect patient satisfaction                                               | 4 studies showed no difference                        | 1 study showed single rooms don't positively affect patient satisfaction |
| Søndergaard 2022 <sup>118</sup>   | SLR 91%    | International | NR         | NR                           | Acute, Surgical, Internal medicine       | Unclear           | Routine       |                                                                                                                     |                                                       | Communication and interaction with kindred spirits was appreciated       |



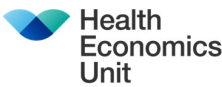

| Citation                   | QA      | Location      | Population | Number of patients/hospitals | Patient type | Type of admission | Level of care | Data that favour single room                                                                                                                                          | Data showing no difference                                                                                                                                                  | Data that favour shared room                                      |
|----------------------------|---------|---------------|------------|------------------------------|--------------|-------------------|---------------|-----------------------------------------------------------------------------------------------------------------------------------------------------------------------|-----------------------------------------------------------------------------------------------------------------------------------------------------------------------------|-------------------------------------------------------------------|
|                            |         |               |            |                              |              |                   |               |                                                                                                                                                                       |                                                                                                                                                                             | Bedridden / older patients were less satisfied with single rooms. |
| Taylor 2018 <sup>129</sup> | SLR 91% | International | NR         | NR                           | Mixed        | Mixed             | Mixed         | Patient perceptions of dignity                                                                                                                                        |                                                                                                                                                                             |                                                                   |
| Voigt 2018 <sup>141</sup>  | SLR 86% | International | NR         | NR                           | NR           | Unclear           | Routine       | 1 study found advantages for feelings of safety<br>1 study found advantages for patient preference<br>1 study found advantage or no difference for patient preference | 1 study found mixed findings for feelings of safety<br>All studies found mixed findings regarding concern for others<br>1 study found mixed findings for patient preference |                                                                   |

For peer review only

**Table 13. Summary of studies reporting data on patient monitoring and safeguarding**

| Citation                                                                      | QA   | Location       | Population      | Number of patients/hospitals                                    | Patient type                                  | Type of admission | Level of care | Data that favour single room    | Data showing no difference                                   | Data that favour shared room                                                                                   |
|-------------------------------------------------------------------------------|------|----------------|-----------------|-----------------------------------------------------------------|-----------------------------------------------|-------------------|---------------|---------------------------------|--------------------------------------------------------------|----------------------------------------------------------------------------------------------------------------|
| <b>Before and after a hospital relocation plus Contemporaneous comparison</b> |      |                |                 |                                                                 |                                               |                   |               |                                 |                                                              |                                                                                                                |
| Maben 2016 <sup>77</sup>                                                      | 67%  | United Kingdom | Unclear         | 32 patients, 21 HCP, 1 hospital relocation, 2 control hospitals | Mixed                                         | Unclear           | Mixed         |                                 | <i>Qualitative (regular visits by staff to single-rooms)</i> |                                                                                                                |
| <b>Before and after a hospital relocation</b>                                 |      |                |                 |                                                                 |                                               |                   |               |                                 |                                                              |                                                                                                                |
| Real 2018 <sup>105</sup>                                                      | 56%  | United States  | Unclear         | 111 patients, 77 nurses, 1 hospital, 1 ward                     | Cardio-vascular                               | Unclear           | ICU, Routine  |                                 | Staffing ratio                                               |                                                                                                                |
| Jansen 2021 <sup>55</sup>                                                     | 63%  | Netherlands    | Neonates        | 712 patients 1 hospital, 2 units                                | Premature neonates                            | Maternity care    | NICU          |                                 | Nurse-to-patient ratio                                       |                                                                                                                |
| Jones 2016 <sup>58</sup>                                                      | 100% | Australia      | Neonates        | 66 mothers, 51 nurses, 1 hospital relocation                    | Adults, Mothers of premature neonates, Nurses | Maternity         | NICU          |                                 |                                                              | Nurse perception (parallel patient interactions, get caught in single rooms so can't attend to other families) |
| Jung 2022 <sup>62</sup>                                                       | 67%  | South Korea    | Adults          | 901 patients, 1 hospital                                        | Mixed                                         | Unclear           | ICU           |                                 | Nurse-to-patient ratio                                       |                                                                                                                |
| <b>Contemporaneous comparison</b>                                             |      |                |                 |                                                                 |                                               |                   |               |                                 |                                                              |                                                                                                                |
| Bevan 2016 <sup>5</sup>                                                       | 59%  | United Kingdom | Adults, Elderly | 50 patients, 2 hospitals                                        | Acute medical illness                         | Emergency         | Routine       | Patient perceptions (isolation) |                                                              |                                                                                                                |
| Bodack 2016 <sup>10</sup>                                                     | 55%  | Germany        | Neonates        | 35 pairs of parents                                             | Premature neonates                            | Maternity care    | NICU          | Somewhat less frequent          |                                                              |                                                                                                                |



| Citation                                         | QA  | Location       | Population      | Number of patients/hospitals                                                    | Patient type                                 | Type of admission | Level of care | Data that favour single room                                             | Data showing no difference     | Data that favour shared room |
|--------------------------------------------------|-----|----------------|-----------------|---------------------------------------------------------------------------------|----------------------------------------------|-------------------|---------------|--------------------------------------------------------------------------|--------------------------------|------------------------------|
|                                                  |     |                |                 |                                                                                 |                                              |                   |               | adequate monitoring                                                      |                                |                              |
| Bracco 2007 <sup>13</sup>                        | 74% | Canada         | Adults          | 2522 patients (of whom 207 known MRS carriers at admission), 1 hospital, 1 ward | Mixed, Post surgery, Medical admission       | Mixed             | ICU           | Standard nurse-to-patient ratio 1:2                                      |                                |                              |
| Ehrlander 2009 <sup>35</sup>                     | 78% | United States  | Adults          | 117 patients, 1 hospital                                                        | Mixed                                        | Unclear           | Routine       | p=0.025, patient perception of nurse availability                        |                                |                              |
| Deitrick 2010 <sup>26</sup>                      | 90% | United States  | Adults          | 24 patients, 29 HCP, 2 hospitals, 2 wards                                       | Orthopaedic, Neurological, Surgical          | Unclear           | Routine       | Better response to call lights. More visits to anticipate patient needs. |                                |                              |
| Hosseini 2017 <sup>52</sup>                      | 63% | Iran           | Adults          | 132 patients, 2 hospitals                                                       | Medical, Surgical                            | Unclear           | Routine       | p=0.19, access to nurses                                                 |                                |                              |
| Julian 2015 <sup>61</sup>                        | 78% | United States  | Neonates        | 1823 patients 1 hospital, 1 unit                                                | Neonates                                     | Mixed             | NICU          |                                                                          | Nurse-to-patient ratio         |                              |
| Nahas 2016 <sup>89</sup>                         | 56% | United Kingdom | Adults, Elderly | 60 patients, 2 hospitals                                                        | Orthopaedic (elective hip/knee arthroplasty) | Elective          | Routine       |                                                                          | p=0.244, response to call bell |                              |
| <b>Early vs late response to new unit design</b> |     |                |                 |                                                                                 |                                              |                   |               |                                                                          |                                |                              |

| Citation                 | QA   | Location | Population | Number of patients/hospitals                                                                                                                 | Patient type | Type of admission | Level of care | Data that favour single room               | Data showing no difference | Data that favour shared room                                                             |
|--------------------------|------|----------|------------|----------------------------------------------------------------------------------------------------------------------------------------------|--------------|-------------------|---------------|--------------------------------------------|----------------------------|------------------------------------------------------------------------------------------|
| Ferri 2015 <sup>41</sup> | 100% | Canada   | Adults     | 39 HCPs, of which 13 nurses, 7 respiratory therapists, 5 HCPS (other), 6 physicians, 4 family members, 4 support staff<br>1 hospital, 1 unit | Unclear      | Unclear           | ICU           | 75 negative comments on shared-room design |                            | Qualitative (less safety concerns related to distance between patient and care provider) |

**Table 14. Summary of studies reporting views on patient confidentiality**

| Citation                                                                      | QA   | Location       | Population | Number of patients/hospitals                                                                                                      | Patient type                                  | Type of admission | Level of care | Data that favour single room                                          | Data showing no difference                | Data that favour shared room |
|-------------------------------------------------------------------------------|------|----------------|------------|-----------------------------------------------------------------------------------------------------------------------------------|-----------------------------------------------|-------------------|---------------|-----------------------------------------------------------------------|-------------------------------------------|------------------------------|
| <b>Before and after a hospital relocation plus Contemporaneous comparison</b> |      |                |            |                                                                                                                                   |                                               |                   |               |                                                                       |                                           |                              |
| Maben 2016 <sup>77</sup>                                                      | 67%  | United Kingdom | Unclear    | 32 patients, 21 HCP, 1 hospital relocation, 2 control hospitals                                                                   | Mixed                                         | Unclear           | Mixed         | Qualitative (confidentiality)                                         |                                           |                              |
| <b>Before and after a hospital relocation</b>                                 |      |                |            |                                                                                                                                   |                                               |                   |               |                                                                       |                                           |                              |
| Ferri 2015 <sup>41</sup>                                                      | 100% | Canada         | Adults     | 39 HCPs, of which 13 nurses, 7 respiratory therapists, 5 HCPS (other), 6 physicians, 4 family members 4 support staff, 1 hospital | Unclear                                       | Unclear           | ICU           | Qualitative (patient perceptions of confidentiality)                  |                                           |                              |
| Jones 2016 <sup>58</sup>                                                      | 100% | Australia      | Neonates   | 66 mothers, 51 nurses, 1 hospital relocation                                                                                      | Adults, Mothers of premature neonates, Nurses | Maternity         | NICU          | Qualitative (nurse perceptions of confidentiality, facilitating care) |                                           |                              |
| Florey 2009 <sup>42</sup>                                                     | 44%  | United Kingdom | Adults     | 80 patients, 2 hospitals, 1 move                                                                                                  | Medical and surgical, Adults                  | Unclear           | Routine       | p<0.001 ability to have confidential discussions                      |                                           |                              |
| Real 2018 <sup>105</sup>                                                      | 56%  | United States  | Unclear    | 111 patients, 77 nurses, 1 hospital, 1 ward                                                                                       | Cardio-vascular                               | Unclear           | ICU, Routine  |                                                                       | Patient satisfaction with confidentiality |                              |

| Citation                          | QA         | Location       | Population          | Number of patients/hospitals                   | Patient type                                        | Type of admission  | Level of care | Data that favour single room                                                                                                       | Data showing no difference | Data that favour shared room |
|-----------------------------------|------------|----------------|---------------------|------------------------------------------------|-----------------------------------------------------|--------------------|---------------|------------------------------------------------------------------------------------------------------------------------------------|----------------------------|------------------------------|
| Roos 2020 <sup>108</sup>          | 90%        | Norway         | Adults              | 39 patients, 1 hospital relocation             | Internal medicine, Surgical, Maternity              | Maternity, Unclear | Routine       | Qualitative (patient perceptions of confidentiality)                                                                               |                            |                              |
| <b>Contemporaneous comparison</b> |            |                |                     |                                                |                                                     |                    |               |                                                                                                                                    |                            |                              |
| Bodack 2016 <sup>10</sup>         | 56%        | Germany        | Neonates            | 35 pairs of parents of 40 neonates, 1 hospital | Neonates                                            | Emergency          | ICU           | Qualitative (easier to guarantee confidentiality)                                                                                  |                            |                              |
| Bevan 2016 <sup>5</sup>           | 59%        | United Kingdom | Adults, Elderly     | 50 patients, 2 hospitals                       | Acute illness                                       | Emergency          | Routine       | Qualitative (patient perceptions of confidentiality)                                                                               |                            |                              |
| Hosseini 2017 <sup>52</sup>       | 63%        | Iran           | Adults              | 2 hospitals<br>132 patients                    | Adults, Medical or surgical                         | Unclear            | Routine       | p<0.001 comfortable discussing personal problems                                                                                   |                            |                              |
| Malcolm 2005 <sup>78</sup>        | 80%        | New Zealand    | Adolescents, Adults | 12 former patients                             | Mixed surgery, orthopaedic, medical, obstetric, ENT | Mixed              | Routine       | Qualitative (patients in shared rooms felt a lack of privacy and confidentiality which affected relationships with other patients) |                            |                              |
| <b>Evidence synthesis</b>         |            |                |                     |                                                |                                                     |                    |               |                                                                                                                                    |                            |                              |
| OECD WHO 2019 <sup>92</sup>       | Report 14% | Europe         | NR                  | NR                                             | Mixed                                               | Mixed              | Mixed         | p<0.05, improved patient confidentiality                                                                                           |                            |                              |

**Table 2. Summary of studies reporting data on availability of beds, space requirements, and capital costs**

| Citation                                                                      | QA   | Location       | Population | Number of patients/<br>hospitals                                            | Patient type                                  | Type of<br>admission | Level of<br>care | Data that favour<br>single room                                       | Data showing no<br>difference | Data that favour<br>shared room                                         |
|-------------------------------------------------------------------------------|------|----------------|------------|-----------------------------------------------------------------------------|-----------------------------------------------|----------------------|------------------|-----------------------------------------------------------------------|-------------------------------|-------------------------------------------------------------------------|
| <b>Before and after a hospital relocation plus contemporaneous comparison</b> |      |                |            |                                                                             |                                               |                      |                  |                                                                       |                               |                                                                         |
| Maben 2016 <sup>77</sup>                                                      | 67%  | United Kingdom | Unclear    | 32 patients, 21 HCP, 1 hospital relocation, 2 control hospitals             | Mixed                                         | Unclear              | Mixed            |                                                                       |                               | Higher space requirement for single-bed wards<br>Building costs per bed |
| <b>Before and after a hospital relocation</b>                                 |      |                |            |                                                                             |                                               |                      |                  |                                                                       |                               |                                                                         |
| Darley 2018 <sup>24</sup>                                                     | 56%  | United Kingdom | Unclear    | 1 hospital relocation                                                       | Unclear                                       | Unclear              | Routine          | Ward closures per year<br>Bed days lost per 100,000                   |                               |                                                                         |
| Domanico 2011 <sup>29</sup>                                                   | 63%  | United States  | Neonates   | 162 patients (PEMRs 2/3=150, PEMRs 4=12), 1 hospital, 2 units               | Paediatric                                    | NR                   | NICU             | Number of patients accommodated;<br>Total space                       |                               |                                                                         |
| Jones 2016 <sup>58</sup>                                                      | 100% | Australia      | Neonates   | 66 mothers, 51 nurses, 1 hospital relocation                                | Adults, Mothers of premature neonates, Nurses | Maternity            | NICU             | Capacity                                                              |                               | Room space                                                              |
| Jongerden 2013 <sup>59</sup>                                                  | 67%  | Netherlands    | Adults     | 387 patients, 323 completed surveys, 1 hospital Before and after relocation | Mixed, Adults                                 | Mixed                | ICU              | Number of beds<br>Space per bed                                       |                               |                                                                         |
| Jung 2022 <sup>62</sup>                                                       | 67%  | Korea          | Adults     | 901 patients, 1 hospital Before and after renovation                        | Adult, mixed                                  | Unclear              | ICU              |                                                                       | Number of isolated rooms      | Number of beds                                                          |
| Kosuge 2013 <sup>67</sup>                                                     | 41%  | Japan          | Unclear    | 555 beds, 1 hospital                                                        | Surgical, Internal medicine                   | Unclear              | Routine          | Number of beds (working, general, per nursing unit)<br>Wards in total | Number of beds (tuberculosis) | Number of beds (mental, cases of floor transfer)                        |

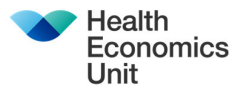

| Citation                          | QA  | Location             | Population      | Number of patients/<br>hospitals                          | Patient type                 | Type of admission         | Level of care | Data that favour single room                                                                                                                                                  | Data showing no difference                           | Data that favour shared room                          |
|-----------------------------------|-----|----------------------|-----------------|-----------------------------------------------------------|------------------------------|---------------------------|---------------|-------------------------------------------------------------------------------------------------------------------------------------------------------------------------------|------------------------------------------------------|-------------------------------------------------------|
|                                   |     |                      |                 |                                                           |                              |                           |               |                                                                                                                                                                               | Total number of people / day and the wards           |                                                       |
| Lawson 2000 <sup>69</sup>         | 41% | United Kingdom       | Adults          | 424 patients, 2 hospitals, 4 wards (pre-/post-relocation) | Orthopaedic                  | Unclear                   | Routine       | Number of beds                                                                                                                                                                |                                                      |                                                       |
| Real 2018 <sup>105</sup>          | 56% | United States        | Unclear         | 111 patients, 77 nurses, 1 hospital, 1 ward               | Cardio-vascular              | Unclear                   | ICU, Routine  | Qualitative (larger rooms promote more space for family)                                                                                                                      |                                                      |                                                       |
| Rosbergen 2020 <sup>109</sup>     | 74% | Australia            | Adults, Elderly | 73 patients, 1 hospital relocation                        | Stroke, Neurological         | Emergency, Rehabilitation | Routine       | p=0.007, number of single bedrooms in acute stroke unit/ neurology<br>p<0.001, number of single bedrooms in inpatient rehab unit<br>Ward length<br>Total communal floor space | Number of any bedrooms, acute stroke unit/ neurology | Number of any bedrooms, inpatient rehabilitation unit |
| <b>Contemporaneous comparison</b> |     |                      |                 |                                                           |                              |                           |               |                                                                                                                                                                               |                                                      |                                                       |
| Julian 2015 <sup>61</sup>         | 78% | United States        | Neonates        | 1823 patients, 1 hospital, 1 unit                         | Neonates                     | Mixed                     | NICU          |                                                                                                                                                                               |                                                      | Bed capacity                                          |
| Kinnula 2008 <sup>64</sup>        | 63% | Finland              | Children        | 1927 patients, 1 hospital                                 | Children, infectious disease | Mixed                     | Routine       | Single rooms usage (approx. 90%)                                                                                                                                              | Number of rooms                                      |                                                       |
| Kinnula 2012 <sup>65</sup>        | 67% | Finland, Switzerland | Children        | 5119 patients, 3 hospitals, 4 wards                       | Children, mixed              | Mixed                     | Routine       |                                                                                                                                                                               |                                                      | Bed capacity                                          |
| Pineda 2012 <sup>100</sup>        | 70% | United States        | Neonates        | 81 patients, 1 hospital                                   | Premature neonates           | Emergency                 | NICU          |                                                                                                                                                                               |                                                      | Number of beds; Room/ward area                        |



1  
2  
3  
4  
5  
6  
7  
8  
9  
10  
11  
12  
13  
14  
15  
16  
17  
18  
19  
20  
21  
22  
23  
24  
25  
26  
27  
28  
29  
30  
31  
32  
33  
34  
35  
36  
37  
38  
39  
40  
41  
42  
43  
44  
45  
46  
47



| Citation                      | QA   | Location              | Population | Number of patients/<br>hospitals | Patient type | Type of admission | Level of care | Data that favour single room | Data showing no difference | Data that favour shared room |
|-------------------------------|------|-----------------------|------------|----------------------------------|--------------|-------------------|---------------|------------------------------|----------------------------|------------------------------|
| Quach 2018 <sup>104</sup>     | 59%  | Canada, United States | Children   | 83,334 patient-days, 2 hospitals | Children     | Mixed             | Mixed         |                              |                            | Bed capacity                 |
| Stelwagen 2021 <sup>120</sup> | 100% | Netherlands           | Neonates   | 36 parents, 1 hospital           | Neonates     | Emergency         | ICU           | Capacity; Room/ward area     |                            |                              |

**Table 16. Summary of studies reporting data on length of stay**

| Citation                                                                      | QA  | Location       | Population | Number of patients/ hospitals                                   | Patient type         | Type of admission | Level of care | Data that favour single room                                                                                                                                          | Data showing no difference                 | Data that favour shared room                                                                                                                                      |
|-------------------------------------------------------------------------------|-----|----------------|------------|-----------------------------------------------------------------|----------------------|-------------------|---------------|-----------------------------------------------------------------------------------------------------------------------------------------------------------------------|--------------------------------------------|-------------------------------------------------------------------------------------------------------------------------------------------------------------------|
| <b>Before and after a hospital relocation plus contemporaneous comparison</b> |     |                |            |                                                                 |                      |                   |               |                                                                                                                                                                       |                                            |                                                                                                                                                                   |
| Maben 2016 <sup>77</sup>                                                      | 67% | United Kingdom | Unclear    | 32 patients, 21 HCP, 1 hospital relocation, 2 control hospitals | Mixed                | Unclear           | Mixed         | LOS (per 1,000 patient-days): new hospital older people's ward, control new-build hospital older people's ward, steady-state control hospital medical assessment unit |                                            | LOS (per 1,000 patient-days): new hospital assessment unit, control new-build hospital medical assessment unit, steady-state control hospital older people's ward |
| <b>Before and after a hospital relocation</b>                                 |     |                |            |                                                                 |                      |                   |               |                                                                                                                                                                       |                                            |                                                                                                                                                                   |
| Blandfort 2019 <sup>6</sup>                                                   | 67% | Denmark        | Elderly    | 964 patients, 2 hospitals                                       | Geriatric, Dementia  | Elective          | Routine       | p=0.35, median LOS                                                                                                                                                    |                                            |                                                                                                                                                                   |
| Blandfort 2019 <sup>7</sup>                                                   | 67% | Denmark        | Elderly    | 1014 patients, 2 hospitals                                      | Geriatric, Dementia  | Elective          | Routine       | Fewer cases with LOS ≥ 14 days                                                                                                                                        | Minimum LOS                                | Maximum LOS                                                                                                                                                       |
| Cantoni 2009 <sup>16</sup>                                                    | 67% | Switzerland    | Adults     | 227 patients, 1 hospital                                        | Stem cell transplant | Elective          | Routine       | LOS<br>Duration of catheterisation<br>Number of patients catheterised                                                                                                 |                                            |                                                                                                                                                                   |
| Carter 2008 <sup>18</sup>                                                     | 33% | United States  | Neonates   | 53 parents, 1 hospital Before and after relocation              | Neonates             | Emergency         | NICU          | LOS                                                                                                                                                                   |                                            |                                                                                                                                                                   |
| Davis 2019 <sup>25</sup>                                                      | 67% | Australia      | Adults     | 1569 patients, 1 hospital relocation                            | Orthopaedic          | Elective          | Routine       |                                                                                                                                                                       | p=0.698, ward LOS<br>p=0.226, hospital LOS |                                                                                                                                                                   |
| Domanico 2010 <sup>28</sup>                                                   | 63% | United States  | Neonates   | 161 caregivers, 1 hospital, 2 units                             | Paediatric           | NR                | NICU          | LOS                                                                                                                                                                   |                                            |                                                                                                                                                                   |
| Domanico 2011 <sup>29</sup>                                                   | 63% | United States  | Neonates   | 162 patients (PEMRs 2/3=150,                                    | Paediatric           | NR                | NICU          |                                                                                                                                                                       | p=0.340, LOS for PEMR 2 and 3 patients     |                                                                                                                                                                   |

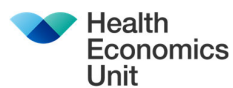

| Citation                     | QA  | Location      | Population | Number of patients/ hospitals                                               | Patient type       | Type of admission | Level of care | Data that favour single room                  | Data showing no difference                                                                                             | Data that favour shared room                                                                               |
|------------------------------|-----|---------------|------------|-----------------------------------------------------------------------------|--------------------|-------------------|---------------|-----------------------------------------------|------------------------------------------------------------------------------------------------------------------------|------------------------------------------------------------------------------------------------------------|
|                              |     |               |            | PEMRs 4=12), 1 hospital, 2 units                                            |                    |                   |               |                                               | p=0.890, LOS for PEMR 4 patients                                                                                       |                                                                                                            |
| Erickson 2011 <sup>38</sup>  | 67% | United States | Neonates   | 73 patients, 1 hospital Before and after relocation                         | Preterm neonates   | Emergency         | NICU          |                                               | p=0.73, LOS                                                                                                            |                                                                                                            |
| Gregersen 2021 <sup>46</sup> | 70% | Denmark       | Elderly    | 446 patients, 1 hospital relocation                                         | Geriatric          | Unclear           | Routine       |                                               | p=0.50, hospital LOS                                                                                                   |                                                                                                            |
| Harris 2004 <sup>49</sup>    | 74% | Canada        | Adults     | 976 patients, 1 hospital, Before and after new unit established             | Pregnancy          | Maternity         | Routine       | p<0.001, total LOS<br>p<0.001, postpartum LOS |                                                                                                                        | p=0.01, length of first stage labour<br>p=0.002, length of second stage labour<br>p=0.002, intrapartum LOS |
| Hourigan 2018 <sup>53</sup>  | 63% | United States | Neonates   | 32 patients, 1 hospital Before and after relocation                         | Neonates           | Emergency         | ICU           |                                               | p=0.52, LOS                                                                                                            |                                                                                                            |
| Jansen 2021 <sup>55</sup>    | 63% | Netherlands   | Neonates   | 712 patients, 1 hospital, 2 units relocation                                | Premature neonates | Maternity         | NICU          |                                               | p=0.36, hospital LOS                                                                                                   |                                                                                                            |
| Jongerden 2013 <sup>59</sup> | 67% | Netherlands   | Adults     | 387 patients, 323 completed surveys, 1 hospital Before and after relocation | Mixed, Adults      | Mixed             | ICU           |                                               | p=0.25, ICU LOS: family<br>p=0.11, ICU LOS: patients<br>p=0.25, hospital LOS: family<br>p=0.60, hospital LOS: patients |                                                                                                            |
| Jung 2022 <sup>62</sup>      | 67% | Korea         | Adults     | 901 patients, 1 hospital Before and after renovation                        | Adult, mixed       | Unclear           | ICU           |                                               | p=0.575, ICU LOS                                                                                                       |                                                                                                            |

| Citation                    | QA  | Location       | Population | Number of patients/ hospitals                                   | Patient type                 | Type of admission | Level of care | Data that favour single room                                                                                                                          | Data showing no difference                               | Data that favour shared room                                                      |
|-----------------------------|-----|----------------|------------|-----------------------------------------------------------------|------------------------------|-------------------|---------------|-------------------------------------------------------------------------------------------------------------------------------------------------------|----------------------------------------------------------|-----------------------------------------------------------------------------------|
| Kainiemi 2021 <sup>63</sup> | 59% | Finland        | Neonates   | 61 families, 1 hospital, 1 unit (pre-post-restructuring)        | Pre-term infants (<35 weeks) | Unclear           | NICU          |                                                                                                                                                       | p=0.1784, hospital LOS                                   |                                                                                   |
| Kosuge 2013 <sup>67</sup>   | 41% | Japan          | Unclear    | 555 beds, 1 hospital                                            | Surgical, Internal medicine  | Unclear           | Routine       | Average hospital LOS (surgery, internal medicine)                                                                                                     |                                                          |                                                                                   |
| Lawson 2000 <sup>69</sup>   | 41% | United Kingdom | Adults     | 424 patients, 2 hospitals, 4 wards (pre-/post-relocation)       | Psychiatric and Orthopaedic  | Unclear           | Routine       | p<0.05, hospital LOS (orthopaedic patients not undergoing operation)<br>Hospital LOS overall (psychiatric patients)<br>ICU LOS (psychiatric patients) | Hospital LOS (orthopaedic patients undergoing operation) |                                                                                   |
| Milford 2008 <sup>84</sup>  | 30% | United States  | Neonates   | No. of patients unclear, 1 hospital Before and after relocation | Neonates                     | Emergency         | ICU           | Average LOS                                                                                                                                           |                                                          |                                                                                   |
| Monson 2018 <sup>86</sup>   | 78% | United States  | Neonates   | 90 preterm infants, 15 term-born control infants, 1 hospital    | Preterm neonates             | Emergency         | NICU          |                                                                                                                                                       | p=0.81, LOS                                              |                                                                                   |
| Puumala 2020 <sup>102</sup> | 67% | United States  | Neonates   | 9995 patients, 1 hospital Before and after relocation           | Neonates                     | Emergency         | ICU           | p=0.02, LOS for extremely preterm infants<br>p<0.0001, LOS for very preterm infants                                                                   | p=0.71, LOS for moderately pre-term                      | p<0.0001, overall median hospital LOS<br>p<0.0001, LOS for term/post term infants |
| Pyrke 2017 <sup>103</sup>   | 59% | Canada         | Adults     | 47 patients, 1 hospital relocation                              | Psychiatric                  | Emergency         | Routine       |                                                                                                                                                       | p=0.832, LOS                                             |                                                                                   |

| Citation                           | QA   | Location       | Population      | Number of patients/ hospitals                                       | Patient type                           | Type of admission | Level of care | Data that favour single room                                                    | Data showing no difference | Data that favour shared room                                         |
|------------------------------------|------|----------------|-----------------|---------------------------------------------------------------------|----------------------------------------|-------------------|---------------|---------------------------------------------------------------------------------|----------------------------|----------------------------------------------------------------------|
| Sadatsafavi 2019 <sup>112</sup>    | 100% | United States  | Neonates        | NR, 1 hospital (theoretical)                                        | Neonates                               | NR                | ICU           | Mean benefit–cost ratio 1.298 (95% CI: 1.282–1.315) when reduced LOS considered |                            |                                                                      |
| Singh 2015 <sup>116</sup>          | 70%  | United Kingdom | Adults, Elderly | 1749 patients, 1 hospital relocation                                | Internal medicine, Geriatric           | Mixed             | Routine       | p<0.01, LOS                                                                     |                            |                                                                      |
| Stevens 2014 <sup>123</sup>        | 44%  | United States  | Neonates        | 73 patients, 1 hospital                                             | Neonates                               | Emergency         | ICU           |                                                                                 |                            | p=0.0052, hospital LOS                                               |
| Teltsch 2011 <sup>131</sup>        | 67%  | Canada         | Adults          | 19343 patients, 2 hospitals, Before and after relocation or control | Adults                                 | Unclear           | ICU           |                                                                                 |                            | Average ICU LOS (year 2000, 2001, 2002, 2003, 2004, 2005, and total) |
| van der Hoeven 2022 <sup>135</sup> | 63%  | Netherlands    | Infants         | 1293 infants, 1 hospital Before and after relocation                | Infants                                | Unclear           | ICU           |                                                                                 | p=0.49, hospital LOS       |                                                                      |
| van Veenendaal 2020 <sup>137</sup> | 70%  | Netherlands    | Neonates        | 1152 infants, 1 hospital Before and after relocation                | Neonates                               | Emergency         | ICU           | p=0.016, LOS                                                                    |                            |                                                                      |
| Vietri 2004 <sup>139</sup>         | 59%  | United States  | Adults          | 261 Adults, 1 hospital Before and after relocation                  | Mixed                                  | Unclear           | ICU           |                                                                                 | p=NS, ICU LOS              |                                                                      |
| <b>Contemporaneous comparison</b>  |      |                |                 |                                                                     |                                        |                   |               |                                                                                 |                            |                                                                      |
| Bodack 2016 <sup>10</sup>          | 56%  | Germany        | Neonates        | 35 pairs of parents of 40 neonates, 1 hospital                      | Neonates                               | Emergency         | ICU           | LOS                                                                             |                            |                                                                      |
| Bracco 2007 <sup>13</sup>          | 74%  | Canada         | Adults          | 2522 patients (of whom 207 known MRS carriers at                    | Mixed, Post surgery, Medical admission | Mixed             | ICU           | LOS in the same bed                                                             | LOS                        |                                                                      |

| Citation                                                | QA  | Location       | Population       | Number of patients/ hospitals                        | Patient type                               | Type of admission | Level of care | Data that favour single room | Data showing no difference                                                                         | Data that favour shared room      |
|---------------------------------------------------------|-----|----------------|------------------|------------------------------------------------------|--------------------------------------------|-------------------|---------------|------------------------------|----------------------------------------------------------------------------------------------------|-----------------------------------|
|                                                         |     |                |                  | admission), 1 hospital, 1 ward                       |                                            |                   |               |                              |                                                                                                    |                                   |
| Caruso 2014 <sup>19</sup>                               | 74% | Brazil         | Adults           | 1253 patients, 1 hospital                            | Adults                                     | Mixed             | ICU           |                              | p=0.44, ICU LOS                                                                                    |                                   |
| Deitrick 2010 <sup>26</sup>                             | 90% | United States  | Adults           | 24 patients, 29 HCP, 2 hospitals, 2 wards            | Orthopaedic, Neurological, Surgical        | Unclear           | Routine       | LOS                          |                                                                                                    |                                   |
| Douglas 2005 <sup>30</sup>                              | 90% | United Kingdom | Unclear          | 785 patients (post discharge), 1 hospital            | Surgical, Acute care, Maternity, Geriatric | Unclear           | Routine       |                              | LOS                                                                                                |                                   |
| Erdeve 2008, <sup>36</sup><br>Erdeve 2009 <sup>37</sup> | 74% | Turkey         | Adults, Neonates | 60 infants, 49 mothers, 1 hospital                   | Preterm neonates                           | Emergency         | NICU          |                              | p=0.929, NICU LOS                                                                                  |                                   |
| Felice Tong 2018 <sup>40</sup>                          | 78% | Australia      | Adults           | 185 patients, 1 hospital                             | Orthopaedic                                | Elective          | Routine       |                              | p=0.36, overall LOS<br>p=0.73, LOS for total hip arthroplasty<br>p=0.55, LOS for knee arthroplasty |                                   |
| Grundt 2021 <sup>47</sup>                               | 67% | Norway         | Neonates         | 77 patients, 66 mothers, 2 hospitals, 2 units        | Premature neonates                         | Maternity         | NICU          |                              | p=0.16, LOS                                                                                        |                                   |
| Harris 2006 <sup>50</sup>                               | 63% | United States  | Neonates         | 75 HCP, 21 parents, 5 NICU units (SFR=2, open bay=3) | Neonates                                   | Unclear           | Level 3, NICU | Patient transfers            |                                                                                                    | Average LOS<br>Average discharges |
| Harris 2006 <sup>51</sup>                               | 52% | United States  | Neonates         | 21 parents, 75 HCPs                                  | Neonates                                   | Maternity         | ICU           |                              |                                                                                                    | Average LOS                       |
| Hyun 2021 <sup>54</sup>                                 | 78% | South Korea    | Adults           | 666 patients, 1 hospital                             | Respiratory, COVID-19                      | Emergency         | ICU           | p=0.001, hospital LOS        |                                                                                                    |                                   |
| Kinnula 2008 <sup>64</sup>                              | 63% | Finland        | Children         | 1927 patients, 1 hospital                            | Children, infectious disease               | Mixed             | Routine       |                              | hospital LOS                                                                                       |                                   |

| Citation                     | QA  | Location             | Population   | Number of patients/ hospitals                        | Patient type               | Type of admission | Level of care | Data that favour single room                    | Data showing no difference | Data that favour shared room                                                     |
|------------------------------|-----|----------------------|--------------|------------------------------------------------------|----------------------------|-------------------|---------------|-------------------------------------------------|----------------------------|----------------------------------------------------------------------------------|
| Kinnula 2012 <sup>65</sup>   | 67% | Finland, Switzerland | Children     | 5119 patients, 3 hospitals, 4 wards                  | Children, mixed            | Mixed             | Routine       |                                                 |                            | Mean hospital LOS                                                                |
| Knight 2016 <sup>66</sup>    | 59% | United Kingdom       | Elderly      | 100 patients, 2 hospitals                            | Geriatric, Dementia        | Mixed             | Routine       |                                                 |                            | p=0.001, overall LOS<br>p=0.01, LOS (patients who experienced an inpatient fall) |
| Labarère 2004 <sup>68</sup>  | 70% | France               | Adults       | 4095 patients, 1 hospital                            | Mixed                      | Mixed             | Mixed         |                                                 | hospital LOS               |                                                                                  |
| Lehtonen 2020 <sup>71</sup>  | 74% | International        | Neonates     | 4662 patients, 331 units                             | Preterm neonates           | Emergency         | ICU           | Overall LOS OR <sup>a</sup> -3.4 (-4.7 to -3.1) |                            |                                                                                  |
| Mattner 2007 <sup>79</sup>   | 74% | Germany              | Adults       | 336 patients, 1 hospital                             | Cardiovascular Adults      | Mixed             | ICU           | p=0.004, LOS                                    |                            |                                                                                  |
| Vohr 2017 <sup>140</sup>     | 67% | United States        | Neonates     | 651 patients, 1 hospital Before and after relocation | Neonates                   | Emergency         | NICU          |                                                 |                            | p=0.07, hospital LOS                                                             |
| Tandberg 2019 <sup>128</sup> | 67% | Norway               | Neonates     | 77 patients, 2 hospitals                             | Neonates                   | Emergency         | ICU           |                                                 | p=0.16, LOS                |                                                                                  |
| Lester 2014 <sup>72</sup>    | 63% | United States        | Neonates     | 403 patients, 1 hospital                             | Neonates                   | Emergency         | ICU           |                                                 | p=0.382, LOS               |                                                                                  |
| Lester 2016 <sup>73</sup>    | 59% | United States        | Neonates     | 216 patients, 1 hospital                             | Premature neonates         | Maternity         | ICU           |                                                 | p=0.06, LOS                |                                                                                  |
| Zaal 2013 <sup>145</sup>     | 67% | Netherlands          | Older Adults | 156 patients 1 hospital                              | Older Adults with dementia | Mixed             | ICU           |                                                 | p=0.56, LOS                |                                                                                  |
| <b>Evidence synthesis</b>    |     |                      |              |                                                      |                            |                   |               |                                                 |                            |                                                                                  |
| OECD WHO 2019 <sup>92</sup>  | 14% | Europe               | NR           | NR                                                   | Mixed                      | Mixed             | Mixed         |                                                 | p=NS. LOS                  |                                                                                  |
| Voigt 2018 <sup>141</sup>    | 86% | International        | NR           | NR                                                   | NR                         | Unclear           | Routine       |                                                 | LOS                        |                                                                                  |

**Table 17. Summary of studies reporting data on costs of care**

| Citation                                                                      | QA   | Location       | Population | Number of patients/ hospitals                                      | Patient type             | Type of admission | Level of care | Data that favour single room                                                                                                                   | Data showing no difference                                                           | Data that favour shared room                                                                                  |
|-------------------------------------------------------------------------------|------|----------------|------------|--------------------------------------------------------------------|--------------------------|-------------------|---------------|------------------------------------------------------------------------------------------------------------------------------------------------|--------------------------------------------------------------------------------------|---------------------------------------------------------------------------------------------------------------|
| <b>Before and after a hospital relocation plus contemporaneous comparison</b> |      |                |            |                                                                    |                          |                   |               |                                                                                                                                                |                                                                                      |                                                                                                               |
| Maben 2015 <sup>76</sup>                                                      | 78%  | United Kingdom | Unclear    | 24 staff, 32 patients, 1 hospital (relocated), 2 control hospitals | All patients in hospital | Mixed             | Mixed         |                                                                                                                                                | Cost impact (changes in falls, LOS, medication errors, hospital-acquired infections) |                                                                                                               |
| Maben 2016 <sup>77</sup>                                                      | 67%  | United Kingdom | Unclear    | 32 patients, 21 HCP, 1 hospital relocation, 2 control hospitals    | Mixed                    | Unclear           | Mixed         |                                                                                                                                                |                                                                                      | Cleaning costs per bed<br>Nursing staff full-time equivalent<br>Nursing staff costs                           |
| <b>Before and after a hospital relocation</b>                                 |      |                |            |                                                                    |                          |                   |               |                                                                                                                                                |                                                                                      |                                                                                                               |
| Davis <sup>25</sup> 2019                                                      | 67%  | Australia      | Adults     | 1569 patients, 1 hospital relocation                               | Orthopaedic              | Elective          | Routine       |                                                                                                                                                | p=0.311, discharge to home<br>p=0.406, transfer to other facility                    |                                                                                                               |
| Harris 2004 <sup>49</sup>                                                     | 74%  | Canada         | Adults     | 976 patients, 1 hospital, Before and after new unit established    | Pregnancy                | Maternity         | Routine       | Reduction in overall staffing costs after opening single-room maternity care                                                                   |                                                                                      |                                                                                                               |
| Milford 2008 <sup>84</sup>                                                    | 30%  | United States  | Neonates   | No. of patients unclear, 1 hospital                                | Neonates                 | Emergency         | ICU           | Cost savings due to reduced LOS                                                                                                                |                                                                                      |                                                                                                               |
| Reed 1986 <sup>106</sup>                                                      | 10%  | United States  | Adults     | No. of patients unclear, 1 hospital                                | Pregnant women           | Maternity care    | Routine       | Number of staff required                                                                                                                       |                                                                                      |                                                                                                               |
| Sadatsafavi 2019 <sup>112</sup>                                               | 100% | United States  | Neonates   | 1 hospital (theoretical)                                           | Neonates                 | NR                | ICU           | Investment justifiable when direct costs considered, mean benefit–cost ratio 1.794 (1.783–1.804)<br>Investment justifiable when LOS considered |                                                                                      | Investment not justifiable when nosocomial infections considered, mean benefit–cost ratio 0.730 (0.724-0.735) |



|                                   |     |                |                 |                                                      |                              |           |               |                                                                                                                                            |                                                                                                                                                                          |                                                                                                                                                              |
|-----------------------------------|-----|----------------|-----------------|------------------------------------------------------|------------------------------|-----------|---------------|--------------------------------------------------------------------------------------------------------------------------------------------|--------------------------------------------------------------------------------------------------------------------------------------------------------------------------|--------------------------------------------------------------------------------------------------------------------------------------------------------------|
| Singh 2015 <sup>116</sup>         | 70% | United Kingdom | Adults, Elderly | 1749 patients, 1 hospital relocation                 | Internal medicine, Geriatric | Mixed     | Routine       |                                                                                                                                            | p=0.74, discharge to home<br>p=0.21, discharge to new care home                                                                                                          |                                                                                                                                                              |
| Stevens 2012 <sup>122</sup>       | 44% | United States  | Neonates        | 73 patients, 1 hospital Before and after relocation  | Neonates                     | Emergency | ICU           | Direct cost (infants with equal comorbidities, duration of hospitalisation)                                                                | Costs per square foot                                                                                                                                                    | p <sup>2</sup> =statistically significant, need for nursing and all unit staff                                                                               |
| Stevens 2014 <sup>123</sup>       | 44% | United States  | Neonates        | 73 patients, 1 hospital                              | Neonates                     | Emergency | ICU           | p<0.0001, lower costs for supplies<br>p<0.0001, lower depreciation in costs<br>Full adjustment of the model shows a cost advantage for SFR | p=0.2316, total direct costs<br>p=0.1551, other costs<br>General linear model:<br>p=0.2854, admission<br>p=0.2485, severity<br>p=0.2806, duration of respiratory support | p=0.0373, direct costs for NICU labour<br>p=0.0002, direct costs for other labour costs (therapies, radiology, pharmacy)                                     |
| <b>Contemporaneous comparison</b> |     |                |                 |                                                      |                              |           |               |                                                                                                                                            |                                                                                                                                                                          |                                                                                                                                                              |
| Apple 2014 <sup>4</sup>           | 52% | Sweden         | Unclear         | 81 HCP, 3 ICUs                                       | Mixed                        | Unclear   | ICU           |                                                                                                                                            |                                                                                                                                                                          | Number of staff equired                                                                                                                                      |
| Boardman 2011 <sup>8</sup>        | 91% | Canada         | Unclear         | 537 beds, 1 hospital                                 | Mixed                        | Mixed     | Mixed         | Reduced transfers and waiting time<br>Net social benefits taking into account upfront and ongoing costs and annual benefits                |                                                                                                                                                                          | Cost of a bed per day<br>Up-front land and construction costs<br>On-going annual maintenance, housekeeping, operating, additional nursing and phsycian costs |
| Felice Tong 2018 <sup>40</sup>    | 78% | Australia      | Adults          | 185 patients, 1 hospital                             | Orthopaedic                  | Elective  | Routine       | p=0.002 <sup>u</sup> , p=0.002 <sup>m</sup><br>discharge to rehabilitation                                                                 |                                                                                                                                                                          |                                                                                                                                                              |
| Harris 2006 <sup>50</sup>         | 63% | United States  | Neonates        | 75 HCP, 21 parents, 5 NICU units (SFR=2, open bay=3) | Neonates                     | Unclear   | Level 3, NICU |                                                                                                                                            |                                                                                                                                                                          | Construction costs per square foot                                                                                                                           |
| Harris 2006 <sup>51</sup>         | 63% | Canada         | Adults          | 976 patients, 1 hospital, Before and                 | Pregnancy                    | Maternity | Routine       |                                                                                                                                            |                                                                                                                                                                          | Average costs per square foot <sup>a</sup>                                                                                                                   |



|                                 |      |                              |         |                               |                      |         |         |                                          |                                                                   |                                      |
|---------------------------------|------|------------------------------|---------|-------------------------------|----------------------|---------|---------|------------------------------------------|-------------------------------------------------------------------|--------------------------------------|
|                                 |      |                              |         | after new unit established    |                      |         |         |                                          |                                                                   |                                      |
| Knight 2016 <sup>66</sup>       | 59%  | United Kingdom               | Elderly | 100 patients, 2 hospitals     | Geriatric, Dementia  | Mixed   | Routine |                                          | p=0.17, discharged to home<br>p=0.19, discharged to new care home |                                      |
| Sadatsafavi 2016 <sup>111</sup> | 100% | Canada                       | Unclear | 8811 patient-days, 1 hospital | Medical and surgical | Unclear | ICU     | Costs due to hospital acquired infection |                                                                   | Construction and operating costs     |
| <b>Evidence synthesis</b>       |      |                              |         |                               |                      |         |         |                                          |                                                                   |                                      |
| Adamson 2003 <sup>1</sup>       | 82%  | United States, International | Mixed   | Unclear                       | Mixed                | Mixed   | Mixed   |                                          |                                                                   | Costs per patient by floor plan type |
| Voigt 2018 <sup>141</sup>       | 86%  | International                | NR      | NR                            | NR                   | Unclear | Routine | Operational efficiencies                 |                                                                   |                                      |

## References

1. Adamson D. The Use of Single Patient Rooms vs. Multiple Occupancy Rooms in Acute Care Environments | Semantic Scholar [Internet]. 2003 [cited 2022 May 4]. Available from: <https://www.semanticscholar.org/paper/The-Use-of-Single-Patient-Rooms-vs.-Multiple-Rooms-Chaudhury-Mahmood/252452e8fa872a517c15d6ecf70c74f82a363271>
2. Anåker A, Von Koch L, Sjöstrand C, Bernhardt J, Elf M. A comparative study of patients' activities and interactions in a stroke unit before and after reconstruction—The significance of the built environment. *PLOS ONE*. 2017 Jul 1;12(7):e0177477.
3. Anåker A, Von Koch L, Heylighen A, Elf M. 'It's Lonely': Patients' Experiences of the Physical Environment at a Newly Built Stroke Unit. *Health Environments Research & Design Journal*. 2019;12(3):141–52.
4. Apple M. A Comparative Evaluation of Swedish Intensive Care Patient Rooms. *HERD*. 2014 Apr;7(3):78–93.
5. Bevan V, Edwards C, Woodhouse K, Singh I. Dignified care for older people: Mixed methods evaluation of the impact of the hospital environment - single rooms or multi-bedded wards: *Healthy Aging Research*. 2016;5(13):1–8.
6. Blandfort S, Gregersen M, Rahbek K, Juul S, Damsgaard EM. Analgesic and psychoactive medications and the risk of falls in relation to delirium in single-bed rooms compared to multiple-bed rooms in geriatric inpatients. *Aging Clinical and Experimental Research* 2019 32:8. 2019 Aug 28;32(8):1493–9.
7. Blandfort S, Gregersen M, Rahbek K, Juul S, Damsgaard EM. Single-bed rooms in a geriatric ward prevent delirium in older patients. *Aging Clinical and Experimental Research* 2019 32:1. 2019 Mar 21;32(1):141–7.
8. Boardman AE, Forbes D. A Benefit-Cost Analysis of Private and Semi-Private Hospital Rooms. *J Benefit Cost Anal*. 2011 Jan 3;2(1):1–27.
9. Bocquet A, Wintenberger C, Lupo J, Morand P, Pavese P, Gallouche M, et al. Description of an influenza outbreak in a French university hospital and risk factors of nosocomial influenza. *Eur J Clin Microbiol Infect Dis*. 2021 Apr;40(4):879–84.
10. Bodack E, Schenk O, Karutz H. Die Einrichtung von Einzelzimmern auf neonatologischen Intensivstationen – Auswirkungen auf die Betreuung aus Sicht der Eltern. *Z Geburtshilfe Neonatol*. 2016 Jun;220(3):124–9.
11. Bonizzoli M, Bigazzi E, Peduto C, Tucci V, Zagli G, Pecile P, et al. Microbiological survey following the conversion from a bay-room to single-room intensive care unit design. *Journal of Hospital Infection*. 2011 Jan;77(1):84–6.
12. Boztepe H, Çınar S, Ay A. School-age children's perception of the hospital experience. *J Child Health Care*. 2017 Jun;21(2):162–70.
13. Bracco D, Dubois MJ, Bouali R, Eggimann P. Single rooms may help to prevent nosocomial bloodstream infection and cross-transmission of methicillin-resistant *Staphylococcus aureus* in intensive care units. *Intensive Care Med*. 2007 May 1;33(5):836–40.
14. Bradbury-Jones C, Rattray J, Jones M, MacGillivray S. Promoting the health, safety and welfare of adults with learning disabilities in acute care settings: a structured literature review. *Journal of Clinical Nursing*. 2013;22(11–12):1497–509.
15. Campbell-Yeo M, Kim T, Disher T, Richardson B, Dol J, Bishop T, et al. Do Single-Family Rooms Increase Parental Presence, Involvement, and Maternal Well-Being in Neonatal Intensive Care? *Journal of Perinatal & Neonatal Nursing*. 2021 Oct;35(4):350–61.

16. Cantoni N, Weisser M, Buser A, Arber C, Stern M, Heim D, et al. Infection prevention strategies in a stem cell transplant unit: impact of change of care in isolation practice and routine use of high dose intravenous immunoglobulins on infectious complications and transplant related mortality - Cantoni - 2009 - European Journal of Haematology - Wiley Online Library [Internet]. [cited 2022 Jul 11]. Available from: <https://onlinelibrary.wiley.com/doi/10.1111/j.1600-0609.2009.01249.x>
17. Carlson B, Walsh S, Wergin T, Schwarzkopf K, Ecklund S. Challenges in design and transition to a private room model in the neonatal intensive care unit. *Adv Neonatal Care*. 2006 Oct;6(5):271–80.
18. Carter BS, Carter A, Bennett S. Families' views upon experiencing change in the neonatal intensive care unit environment: from the 'baby barn' to the private room. *J Perinatol*. 2008 Dec;28(12):827–9.
19. Caruso P, Guardian L, Tiengo T, dos Santos LS, Junior PM. ICU Architectural Design Affects the Delirium Prevalence: A Comparison Between Single-Bed and Multibed Rooms\*. *Critical Care Medicine*. 2014 Oct;42(10):2204–10.
20. Cobo J, Asensio Á, Moreno S, Navas E, Pintado V, Oliva J, et al. Risk factors for nosocomial transmission of multidrug-resistant tuberculosis due to *Mycobacterium bovis* among HIV-infected patients. :6.
21. Curtis P, Northcott A. The impact of single and shared rooms on family-centred care in children's hospitals. *Journal of Clinical Nursing*. 2017 Jun;26(11–12):1584–96.
22. Cusack L, Wiechula R, Schultz T, Dollard J, Maben J. Anticipated advantages and disadvantages of a move to 100% single-room hospital in Australia: A case study. *J Nurs Manag*. 2019 Jul;27(5):963–70.
23. Darcy Mahoney A, White RD, Velasquez A, Barrett TS, Clark RH, Ahmad KA. Impact of restrictions on parental presence in neonatal intensive care units related to coronavirus disease 2019. *J Perinatol*. 2020 Sep;40(S1):36–46.
24. Darley ESR, Vasant J, Leeming J, Hammond F, Matthews S, Albur M, et al. Impact of moving to a new hospital build, with a high proportion of single rooms, on healthcare-associated infections and outbreaks. *J Hosp Infect*. 2018 Feb;98(2):191–3.
25. Davis M, Elliott R, Hills R, Fry M. Single-Room Ward Design and Its Impact on Service and Patient Outcomes: An Evaluation Study. *Orthopaedic Nursing*. 2019 Oct;38(5):317–25.
26. Deitrick LM, Bokovoy J, Panik A. The "Dance" Continues ... Evaluating Differences in Call Bell Use Between Patients in Private Rooms and Patients in Double Rooms Using Ethnography. *Journal of Nursing Care Quality*. 2010 Oct;25(4):279–87.
27. de Matos LBN, Fumis RRL, Nassar Junior AP, Lacerda FH, Caruso P. Single-Bed or Multibed Room Designs Influence ICU Staff Stress and Family Satisfaction, But Do Not Influence ICU Staff Burnout. *HERD*. 2020 Apr;13(2):234–42.
28. Domanico R, Davis DK, Coleman F, Davis BO. Documenting the NICU design dilemma: parent and staff perceptions of open ward versus single family room units. *Journal of perinatology : official journal of the California Perinatal Association*. 2010 May;30(5):343–51.
29. Domanico R, Davis DK, Coleman F, Davis BO. Documenting the NICU design dilemma: comparative patient progress in open-ward and single family room units. *Journal of Perinatology* 2010 31:4. 2011 Nov 11;31(4):281–8.

30. Douglas CH, Douglas MR. Patient-centred improvements in health-care built environments: perspectives and design indicators. *Health Expect*. 2005 Sep;8(3):264–76.
31. Dowdeswell B, Erskine J, Heasman M. A Report for NHS Estates, England by the EU Health Property Network. :40.
32. Dowling DA, Blatz MA, Graham G. Mothers' Experiences Expressing Breast Milk for Their Preterm Infants: Does NICU Design Make a Difference? *Advances in Neonatal Care*. 2012 Dec;12(6):377–84.
33. Eberhard-Gran M, Eskild A, Opjordsmoen S, Schei B. Maternity care - sleep, rest and satisfaction. :10.
34. Edéll-Gustafsson U, Angelhoff C, Johnsson E, Karlsson J, Mörelius E. Hindering and buffering factors for parental sleep in neonatal care. A phenomenographic study. *J Clin Nurs*. 2015 Mar;24(5–6):717–27.
35. Ehrlander W, Ali F, Chretien KC. Multioccupancy hospital rooms: Veterans' experiences and preferences. *Journal of Hospital Medicine*. 2009;4(8):E22–7.
36. Erdevé O, Arsan S, Yigit S, Armangil D, Atasay B, Korkmaz A. The impact of individual room on rehospitalization and health service utilization in preterms after discharge. *Acta paediatrica (Oslo, Norway : 1992)*. 2008 Oct;97(10):1351–7.
37. Erdevé O, Arsan S, Canpolat FE, Ertem IO, Karagol BS, Atasay B, et al. Does individual room implemented family- centered care contribute to mother-infant interaction in preterm deliveries necessitating neonatal intensive care unit hospitalization? *American Journal of Perinatology*. 2009 Feb 19;26(2):159–64.
38. Erickson C, Kattelman K, Remington J, Cuirong Ren, Carol Helseth, Stevens D. Traditional open-bay versus single-family room neonatal intensive care unit: a comparison of selected nutrition outcomes. *Research and Reports in Neonatology*. 2011 Mar;15.
39. Everts RJ, Hanger HC, Jennings LC, Hawkins A, Sainsbury R. Outbreaks of influenza A among elderly hospital inpatients. *The New Zealand Medical Journal*. 1996 Jul 1;109(1026):272–4.
40. Felice Tong YY, Karunaratne S, Youlden D, Gupta S. The Impact of Room-Sharing on Length of Stay After Total Hip or Knee Arthroplasty: A Retrospective Study. *Arthroplasty Today*. 2021 Apr;8:289–294.e2.
41. Ferri M, Zygun DA, Harrison A, Stelfox HT. Evidence-based design in an intensive care unit: End-user perceptions. *BMC Anesthesiology*. 2015 Apr 25;15(1):1–9.
42. Florey L, Flynn R, Isles C. Patient Preferences for Single Rooms or Shared Accommodation in a District General Hospital. *Scott Med J*. 2009 May;54(2):5–8.
43. Foo CT, O'Driscoll DM, Ogeil RP, Lubman D, Young AC. Barriers to sleep in acute hospital settings. *Sleep Breath*. 2022 Jun;26(2):855–63.
44. Ford-Jones EL, Mindorff CM, Gold R, Petric M. THE INCIDENCE OF VIRAL-ASSOCIATED DIARRHEA AFTER ADMISSION TO A PEDIATRIC HOSPITAL. *American Journal of Epidemiology*. 1990 Apr;131(4):711–8.
45. Fraenkel Cj, Inghammar M, Söderlund-Strand A, Johansson PJH, Böttiger B. Risk factors for hospital norovirus outbreaks: impact of vomiting, genotype, and multi-occupancy rooms. *Journal of Hospital Infection*. 2018 Apr;98(4):398–403.

46. Gregersen M, Mellemkjær A, Foss CH, Blandfort S. Use of single-bed rooms may decrease the incidence of hospital-acquired infections in geriatric patients: A retrospective cohort study in Central Denmark region. *J Health Serv Res Policy*. 2021 Oct;26(4):282–8.
47. Grundt H, Tandberg BS, Flacking R, Drageset J, Moen A. Associations Between Single-Family Room Care and Breastfeeding Rates in Preterm Infants. *J Hum Lact*. 2021 Aug;37(3):593–602.
48. Halaby T, al Naiemi N, Beishuizen B, Verkooijen R, Ferreira JA, Klont R, et al. Impact of single room design on the spread of multi-drug resistant bacteria in an intensive care unit. *Antimicrob Resist Infect Control*. 2017 Dec;6(1):117.
49. Harris SJ, Farren MD, Janssen PA, Klein MC, Lee SK. Single room maternity care: perinatal outcomes, economic costs, and physician preferences. *Journal of obstetrics and gynaecology Canada : JOGC = Journal d'obstetrique et gynecologie du Canada : JOGC*. 2004;26(7):633–40.
50. Harris DD, Shepley MM, White RD, Kolberg KJS, Harrell JW. The impact of single family room design on patients and caregivers: executive summary. *Journal of Perinatology* 2006 26:3. 2006 Sep 28;26(3):S38–48.
51. Harris D, Shepley M, White R. Impact of Single Family NICU Rooms | The Center for Health Design [Internet]. 2006 [cited 2022 May 4]. Available from: <https://www.healthdesign.org/chd/knowledge-repository/impact-single-family-nicu-rooms>
52. Hosseini SB, Bagheri M. Comparison of Patient Satisfaction with Single Patient Rooms Versus Shared Patient Rooms. *Ann Mil Health Sci Res [Internet]*. 2018 Jul 8 [cited 2022 Jul 20];15(4). Available from: <https://brief.land/amhsr/articles/80199.html>
53. Hourigan SK, Subramanian P, Hasan NA, Ta A, Klein E, Chettout N, et al. Comparison of Infant Gut and Skin Microbiota, Resistome and Virulome Between Neonatal Intensive Care Unit (NICU) Environments. *Front Microbiol*. 2018 Jun 25;9:1361.
54. Hyun M, Lee JY, Kwon YS, Kim JY, Park JS, Park S, et al. COVID-19: Comparing the applicability of shared room and single room occupancy. *Transbound Emerg Dis*. 2021 Jul;68(4):2059–65.
55. Jansen SJ, Lopriore E, Berkhout RJM, van der Hoeven A, Saccoccia B, de Boer JM, et al. The Effect of Single-Room Care Versus Open-Bay Care on the Incidence of Bacterial Nosocomial Infections in Pre-Term Neonates: A Retrospective Cohort Study. *Infectious Diseases and Therapy*. 2021 Mar 1;10(1):373–86.
56. Janssen PA, Klein MC, Harris SJ, Soolsma J, Seymour LC. Single room maternity care and client satisfaction. *Birth (Berkeley, Calif)*. 2000;27(4):235–43.
57. Janssen PA, Dennis CL, Reime B. Development and psychometric testing of the care in obstetrics: Measure for testing satisfaction (COMFORTS) scale. *Research in Nursing & Health*. 2006 Feb 1;29(1):51–60.
58. Jones L, Peters K, Rowe J, Sheeran N. The Influence of Neonatal Nursery Design on Mothers' Interactions in the Nursery. *J Pediatr Nurs*. 2016 Oct;31(5):e301-312.
59. Jongerden IP, Slooter AJ, Peelen LM, Wessels H, Ram CM, Kesecioglu J, et al. Effect of intensive care environment on family and patient satisfaction: a before–after study. *Intensive Care Med*. 2013 Sep 1;39(9):1626–34.

60. Jou J, Ebrahim J, Shofer FS, Hamilton KW, Stern J, Han JH. Environmental Transmission of *Clostridium difficile* : Association Between Hospital Room Size and *C. difficile* Infection. *Infect Control Hosp Epidemiol*. 2015 May;36(5):564–8.
61. Julian S, Burnham CAD, Sellenriek P, Shannon WD, Hamvas A, Tarr PI, et al. Impact of Neonatal Intensive Care Bed Configuration on Rates of Late-Onset Bacterial Sepsis and Methicillin-Resistant *Staphylococcus aureus* Colonization. *Infection Control & Hospital Epidemiology*. 2015 Oct;36(10):1173–82.
62. Jung J, Choe PG, Choi S, Kim E, Lee HY, Kang CK, et al. Reduction in the acquisition rate of carbapenem-resistant *Acinetobacter baumannii* (CRAB) after room privatization in an intensive care unit. *Journal of Hospital Infection*. 2022 Mar 1;121:14–21.
63. Kainiemi E, Hongisto P, Lehtonen L, Pape B, Axelin A. Effects of single family room architecture on parent–infant closeness and family centered care in neonatal environments—a single-center pre–post study. *J Perinatol*. 2021 Sep;41(9):2244–51.
64. Kinnula SE, Renko M, Tapiainen T, Knuutinen M, Uhari M. Hospital-associated infections during and after care in a paediatric infectious disease ward. *J Hosp Infect*. 2008 Apr;68(4):334–40.
65. Kinnula S, Buettcher M, Tapiainen T, Renko M, Vepsäläinen K, Lantto R, et al. Hospital-associated infections in children: a prospective post-discharge follow-up survey in three different paediatric hospitals. *The Journal of hospital infection*. 2012 Jan;80(1):17–24.
66. Knight S, Singh I. Profile of inpatient falls in patients with dementia: A prospective comparative study between 100% single rooms and traditional multibedded wards. *Journal of Clinical Gerontology and Geriatrics*. 2016 Sep;7(3):87–92.
67. KOSUGE R, KOBAYASHI K, KAKEHI A. COMPARATIVE STUDIES ON HOSPITAL-BED MANAGEMENT BETWEEN ALL SINGLE-ROOM WARDS AND MIXED MULTI-BED ROOM WARDS. *Journal of Architecture and Planning (Transactions of AIJ)*. 2013;78(686):765–73.
68. Labarère J, Fourny M, Jean-Phillippe V, Marin-Pache S, Patrice F. Refinement and validation of a French in-patient experience questionnaire. *International Journal of Health Care Quality Assurance*. 2004 Jan 1;17(1):17–25.
69. Lawson B, Phiri M. Hospital design. Room for improvement. *The Health Service Journal*. 2000 Jan 1;110(5688):24–6.
70. Lazar I, Abukaf H, Sofer S, Peled N, Leibovitz E. Impact of Conversion from an Open Ward Design Paediatric Intensive Care Unit Environment to All Isolated Rooms Environment on Incidence of Bloodstream Infections and Antibiotic Resistance in Southern Israel (2000 to 2008) [Internet]. [cited 2022 Jul 11]. Available from: [https://journals.sagepub.com/doi/10.1177/0310057X1504300106?url\\_ver=Z39.88-2003&rfr\\_id=ori:rid:crossref.org&rfr\\_dat=cr\\_pub%20%200pubmed](https://journals.sagepub.com/doi/10.1177/0310057X1504300106?url_ver=Z39.88-2003&rfr_id=ori:rid:crossref.org&rfr_dat=cr_pub%20%200pubmed)
71. Lehtonen L, Lee SK, Kusuda S, Lui K, Norman M, Bassler D, et al. Family Rooms in Neonatal Intensive Care Units and Neonatal Outcomes: An International Survey and Linked Cohort Study. *The Journal of Pediatrics*. 2020 Nov;226:112-117.e4.
72. Lester BM, Hawes K, Abar B, Sullivan M, Miller R, Bigsby R, et al. Single-family room care and neurobehavioral and medical outcomes in preterm infants. *Pediatrics*. 2014;134(4):754–60.

73. Lester BM, Salisbury AL, Hawes K, Dansereau LM, Bigsby R, Laptook A, et al. 18-Month Follow-Up of Infants Cared for in a Single-Family Room Neonatal Intensive Care Unit. *The Journal of pediatrics*. 2016;177:84–9.
74. Liu LX, Mozafarinia M, Axelin A, Feeley N. Parents' Experiences of Support in NICU Single-Family Rooms. *Neonatal Netw*. 2019 Mar 1;38(2):88–97.
75. Lorenz SG, Dreher HM. Hospital Room Design and Health Outcomes of the Aging Adult. *PA P E R S*. 2011;4(2):14.
76. Maben J, Griffiths P, Penfold C, Simon M, Pizzo E, Anderson J, et al. Evaluating a major innovation in hospital design: workforce implications and impact on patient and staff experiences of all single room hospital accommodation. *Health Services and Delivery Research*. 2015 Feb;3(3):1–304.
77. Maben J, Griffiths P, Penfold C, Simon M, Anderson JE, Robert G, et al. One size fits all? Mixed methods evaluation of the impact of 100% single-room accommodation on staff and patient experience, safety and costs. *BMJ quality & safety*. 2016 Apr 1;25(4):241–56.
78. Malcolm HA. Does privacy matter? Former patients discuss their perceptions of privacy in shared hospital rooms. *Nurs Ethics*. 2005 Mar;12(2):156–66.
79. Mattner F, Rüden AS, Mattner L, Chaberny IF, Ziesing S, Strueber M, et al. Thoracic organ transplantation may not increase the risk of bacterial transmission in intensive care units. *International Journal of Hygiene and Environmental Health*. 2007 Mar;210(2):139–45.
80. McDonald EG, Dendukuri N, Frenette C, Lee TC. Time-Series Analysis of Health Care–Associated Infections in a New Hospital With All Private Rooms. *JAMA Intern Med*. 2019 Nov 1;179(11):1501.
81. McKeown K, Haase T, Pratschke J, Twomey S, Donovan H, Engling F. Determinants of care outcomes for patients who die in hospital in Ireland: a retrospective study. *BMC Palliat Care*. 2015 Dec;14(1):11.
82. Mental Welfare Commission for Scotland. *Psychiatr bull*. 1991 Apr;15(4):254–5.
83. Meyer TJ, Eveloff SE, Bauer MS, Schwartz WA, Hill NS, Millman RP. Adverse Environmental Conditions in the Respiratory and Medical ICU Settings. *Chest*. 1994 Apr;105(4):1211–6.
84. Milford C, Zapalo B, Davis G. Transition to an Individual-Room NICU Design: Process and Outcome Measures. *Neonatal Network*. 2008 Sep;27(5):299–305.
85. Miller NO, Friedman SB, Coupey SM. Adolescent preferences for rooming during hospitalization. *Journal of Adolescent Health*. 1998 Aug;23(2):89–93.
86. Monson BB, Eaton-Rosen Z, Kapur K, Liebenthal E, Brownell A, Smyser CD, et al. Differential Rates of Perinatal Maturation of Human Primary and Nonprimary Auditory Cortex. *eNeuro*. 2018 Jan;5(1):ENEURO.0380-17.2017.
87. Morgan H. Single and shared accommodation for young patients in hospital [Internet]. 2010 [cited 2022 Jul 20]. Available from: <https://journals.rcni.com/doi/abs/10.7748/paed2010.10.22.8.20.c7997>



- 1
- 2
- 3
- 4
- 5 88. Munier-Marion E, Bénet T, Régis C, Lina B, Morfin F, Vanhems P. Hospitalization in double-occupancy rooms and the risk of hospital-
- 6 acquired influenza: a prospective cohort study. *Clinical Microbiology and Infection*. 2016 May;22(5):461.e7-461.e9.
- 7 89. Nahas S, Patel A, Duncan J, Nicholl J, Nathwani D. Patient Experience in Single Rooms Compared with the Open Ward for Elective
- 8 Orthopaedic Admissions. *Musculoskeletal Care*. 2016 Mar;14(1):57–61.
- 9 90. Nash D, O'Rourke T, Memmott P, Haynes M. Indigenous Preferences for Inpatient Rooms in Australian Hospitals: A Mixed-Methods
- 10 Study in Cross-Cultural Design. *HERD*. 2021 Jan;14(1):174–89.
- 11 91. Nassery W, Landgren K. Parents' Experience of Their Sleep and Rest When Admitted to Hospital with Their Ill Child: A Qualitative Study.
- 12 *Comprehensive Child and Adolescent Nursing*. 2019 Oct 2;42(4):265–79.
- 13 92. OECD, World Health Organization. Improving Healthcare Quality in Europe: Characteristics, Effectiveness and Implementation of
- 14 Different Strategies [Internet]. OECD; 2019 [cited 2022 Jul 11]. Available from: [https://www.oecd-ilibrary.org/social-issues-migration-](https://www.oecd-ilibrary.org/social-issues-migration-health/improving-healthcare-quality-in-europe_b11a6e8f-en)
- 15 [health/improving-healthcare-quality-in-europe\\_b11a6e8f-en](https://www.oecd-ilibrary.org/social-issues-migration-health/improving-healthcare-quality-in-europe_b11a6e8f-en)
- 16 93. Olson ME, Smith MJ. An evaluation of single-room maternity care. *The Health Care Manager*. 1992 Sep;11(1):43–9.
- 17 94. O'Neill L, Park SH, Rosinia F. The role of the built environment and private rooms for reducing central line-associated bloodstream
- 18 infections. Kamolz LP, editor. *PLoS ONE*. 2018 Jul 27;13(7):e0201002.
- 19 95. Park SH, Stockbridge EL, Miller TL, O'Neill L. Private patient rooms and hospital-acquired methicillin-resistant *Staphylococcus aureus*: A
- 20 hospital-level analysis of administrative data from the United States. *PLOS ONE*. 2020 Jul 9;15(7):e0235754.
- 21 96. Pease NJ, Finlay IG. Do patients and their relatives prefer single cubicles or shared wards? *Palliat Med*. 2002 Jul;16(5):445–6.
- 22 97. Persson E, Määttä S. To provide care and be cared for in a multiple-bed hospital room. *Scandinavian Journal of Caring Sciences*. 2012
- 23 Dec 1;26(4):663–70.
- 24 98. Persson E, Anderberg P, Kristensson Ekwall A. A room of one's own--Being cared for in a hospital with a single-bed room design.
- 25 *Scandinavian journal of caring sciences*. 2015 Jun 1;29(2):340–6.
- 26 99. Pilmis B, Billard-Pomares T, Martin M, Clarempuy C, Lemezo C, Saint-Marc C, et al. Can environmental contamination be explained by
- 27 particular traits associated with patients? *Journal of Hospital Infection*. 2020 Mar;104(3):293–7.
- 28 100. Pineda RG, Stransky KE, Rogers C, Duncan MH, Smith GC, Neil J, et al. The single-patient room in the NICU: maternal and family effects.
- 29 *Journal of perinatology : official journal of the California Perinatal Association*. 2012 Jul;32(7):545–51.
- 30 101. Poncette AS, Wunderlich MM, Spies C, Heeren P, Vorderwülbecke G, Salgado E, et al. Patient Monitoring Alarms in an Intensive Care
- 31 Unit: Observational Study With Do-It-Yourself Instructions. *J Med Internet Res*. 2021 May 28;23(5):e26494.
- 32 102. Puumala SE, Rich RK, Roy L, Reynolds R, Jimenez FE, Opollo JG, et al. Single-family room neonatal intensive care unit design: do patient
- 33 outcomes actually change? | *Journal of Perinatology* [Internet]. [cited 2022 Jul 11]. Available from:
- 34 <https://www.nature.com/articles/s41372-019-0584-6>
- 35
- 36
- 37
- 38
- 39
- 40
- 41

103. Pyrke RJL, McKinnon MC, McNeely HE, Ahern C, Langstaff KL, Bieling PJ. Evidence-Based Design Features Improve Sleep Quality Among Psychiatric Inpatients. *HERD*. 2017 Oct;10(5):52–63.
104. Quach C, Shah R, Rubin LG. Burden of Healthcare-Associated Viral Respiratory Infections in Children’s Hospitals. *Journal of the Pediatric Infectious Diseases Society*. 2018 Feb 19;7(1):18–24.
105. Real K, Fay L. Using Systems Theory to Examine Patient and Nurse Structures, Processes, and Outcomes in Centralized and Decentralized Units. :16.
106. Reed G, Schmid M. Nursing Implementation of Single-Room Maternity Care. *Journal of Obstetric, Gynecologic & Neonatal Nursing*. 1986 Sep;15(5):386–9.
107. Reid J, Wilson K, Anderson KE, Maguire CPJ. Older inpatients’ room preference: single versus shared accommodation. *Age and Ageing*. 2015 Mar;44(2):331–3.
108. Roos AKØ, Skaug EA, Grøndahl VA, Helgesen AK. Trading company for privacy: A study of patients’ experiences. *Nurs Ethics*. 2020 Jun;27(4):1089–102.
109. Rosbergen ICM, Tonello I, Clark RA, Grimley RS. Does hospital design impact on patient activity levels and time spent alone? *Disability and Rehabilitation*. 2022 Jun 19;44(13):3173–80.
110. Rowlands J, Noble S. How does the environment impact on the quality of life of advanced cancer patients? A qualitative study with implications for ward design. *Palliat Med*. 2008 Sep;22(6):768–74.
111. Sadatsafavi H, Niknejad B, Zadeh R, Sadatsafavi M. Do cost savings from reductions in nosocomial infections justify additional costs of single-bed rooms in intensive care units? A simulation case study. *J Crit Care*. 2016 Feb;31(1):194–200.
112. Sadatsafavi H, Niknejad B, Shepley M, Sadatsafavi M. Probabilistic Return-on-Investment Analysis of Single-Family Versus Open-Bay Rooms in Neonatal Intensive Care Units—Synthesis and Evaluation of Early Evidence on Nosocomial Infections, Length of Stay, and Direct Cost of Care. *Journal of Intensive Care Medicine*. 2019 Feb 1;34(2):115–25.
113. Sakr N, Hallit S, Mattar H. Incidence of and Factors Associated with New-Onset Insomnia Among Lebanese Hospitalised Patients: A single-centre study. *Sultan Qaboos Univ Med J*. 2021 Jun 21;21(2):e210-220.
114. Schalkers I, Dedding CWM, Bunders JFG. ‘[I would like] a place to be alone, other than the toilet’ - Children’s perspectives on paediatric hospital care in the Netherlands. *Health Expect*. 2015 Dec;18(6):2066–78.
115. Scottish Intercollegiate Guidelines Network. Sign 50: a guideline developer’s handbook. Healthcare Improvement Scotland; 2014.
116. Singh I, Okeke J, Edwards C. Outcome of in-patient falls in hospitals with 100% single rooms and multi-bedded wards. *Age and Ageing*. 2015;44(6):1032–5.
117. Singh I. (PDF) Loneliness among Older People in Hospitals: A Comparative Study between Single Rooms and Multi- Bedded Wards to Evaluate Current Health Service within the Same Organisation [Internet]. 2016 [cited 2022 May 4]. Available from:

- 1  
2  
3  
4  
5 [https://www.researchgate.net/publication/304495269\\_Loneliness\\_among\\_Older\\_People\\_in\\_Hospitals\\_A\\_Comparative\\_Study\\_between\\_Single\\_Rooms\\_and\\_Multi-Bedded\\_Wards\\_to\\_Evaluate\\_Current\\_Health\\_Service\\_within\\_the\\_Same\\_Organisation](https://www.researchgate.net/publication/304495269_Loneliness_among_Older_People_in_Hospitals_A_Comparative_Study_between_Single_Rooms_and_Multi-Bedded_Wards_to_Evaluate_Current_Health_Service_within_the_Same_Organisation)
- 6  
7 118. Søndergaard SF, Beedholm K, Kolbæk R, Frederiksen K. Patients' and Nurses' Experiences of All Single-Room Hospital Accommodation: A  
8 Scoping Review. *HERD*. 2022 Jan;15(1):292–314.  
9  
10 119. Song X, Soghier L, Floyd TT, Harris TR, Short BL, DeBiasi RL. Reassessing the need for active surveillance of extended-spectrum beta-  
11 lactamase-producing Enterobacteriaceae in the neonatal intensive care population. *Infect Control Hosp Epidemiol*. 2018  
12 Dec;39(12):1436–41.  
13 120. Stelwagen M, van Kempen A, Westmaas A, Vet E, Scheele F. Parents' Experiences With a Model of Integrated Maternity and Neonatal  
14 Care Designed to Empower Parents. *Journal of Obstetric, Gynecologic & Neonatal Nursing*. 2021 Mar;50(2):181–92.  
15 121. Stevens DC, Helseth CC, Khan MA, Munson DP, Reid EJ. A Comparison of Parent Satisfaction in an Open-Bay and Single-Family Room  
16 Neonatal Intensive Care Unit. *HERD*. 2011 Apr;4(3):110–23.  
17 122. Stevens DC, Helseth CC, Thompson PA, Pottala JV, Khan MA, Munson DP. A Comprehensive Comparison of Open-Bay and Single-Family-  
18 Room Neonatal Intensive Care Units at Sanford Children's Hospital. *HERD*. 2012 Jul;5(4):23–39.  
19 123. Stevens DC, Thompson PA, Helseth CC, Hsu B, Khan MA, Munson DP. A comparison of the direct cost of care in an open-bay and single-  
20 family room NICU. *Journal of Perinatology* 2014 34:11. 2014 Sep 25;34(11):830–5.  
21 124. Stiller A, Schröder C, Gropmann A, Schwab F, Behnke M, Geffers C, et al. ICU ward design and nosocomial infection rates: a cross-  
22 sectional study in Germany. *Journal of Hospital Infection*. 2017 Jan;95(1):71–5.  
23 125. Swanson JR, Peters C, Lee BH. NICU redesign from open ward to private room: a longitudinal study of parent and staff perceptions. *J*  
24 *Perinatol*. 2013 Jun;33(6):466–9.  
25 126. Tandberg BS, Frøslie KF, Flacking R, Grundt H, Lehtonen L, Moen A. Parent-Infant Closeness, Parents' Participation, and Nursing Support  
26 in Single-Family Room and Open Bay NICUs. *J Perinat Neonatal Nurs*. 2018 Dec;32(4):E22–32.  
27 127. Tandberg BS, Flacking R, Markestad T, Grundt H, Moen A. Parent psychological wellbeing in a single-family room versus an open bay  
28 neonatal intensive care unit. *PLOS ONE*. 2019 Nov 1;14(11):e0224488.  
29 128. Tandberg BS, Frøslie KF, Markestad T, Flacking R, Grundt H, Moen A. Single-family room design in the neonatal intensive care unit did  
30 not improve growth. *Acta Paediatrica*. 2019 Jun 1;108(6):1028–35.  
31 129. Taylor E, Card AJ, Piatkowski M. Single-Occupancy Patient Rooms: A Systematic Review of the Literature Since 2006. *HERD*. 2018  
32 Jan;11(1):85–100.  
33 130. Tegnestedt C, Günther A, Reichard A, Bjurström R, Alvarsson J, Martling CR, et al. Levels and sources of sound in the intensive care unit -  
34 an observational study of three room types: Levels and sources of sound in a multidisciplinary ICU. *Acta Anaesthesiol Scand*. 2013  
35 Sep;57(8):1041–50.  
36  
37  
38  
39  
40  
41

131. Teltsch DY, Hanley J, Loo V, Goldberg P, Gursahaney A, Buckeridge DL. Infection Acquisition Following Intensive Care Unit Room Privatization. *Arch Intern Med* [Internet]. 2011 Jan 10 [cited 2022 Jul 14];171(1). Available from: <http://archinte.jamanetwork.com/article.aspx?doi=10.1001/archinternmed.2010.469>
132. Toivonen M, Lehtonen L, Löyttyniemi E, Axelin A. Effects of single-family rooms on nurse-parent and nurse-infant interaction in neonatal intensive care unit. *Early Human Development*. 2017 Mar 1;106–107:59–62.
133. Vaisman A, Jula M, Wagner J, Winston LG. Examining the association between hospital-onset *Clostridium difficile* infection and multiple-bed room exposure: a case-control study. *Infect Control Hosp Epidemiol*. 2018 Sep;39(9):1068–73.
134. van de Glind I, van Dulmen S, Goossensen A. Physician–patient communication in single-bedded versus four-bedded hospital rooms. *Patient Education and Counseling*. 2008 Nov 1;73(2):215–9.
135. van der Hoeven A, Bekker V, Jansen SJ, Saccoccia B, Berkhout RJM, Lopriore E, et al. Impact of transition from open bay to single room design neonatal intensive care unit on multidrug-resistant organism colonization rates. *Journal of Hospital Infection*. 2022 Feb;120:90–7.
136. Van Enk RA, Steinberg F. Comparison of Private Room with Multiple-Bed Ward Neonatal Intensive Care Unit Environments. *HERD*. 2011 Oct;5(1):52–63.
137. van Veenendaal NR, van der Schoor SRD, Heideman WH, Rijnhart JJM, Heymans MW, Twisk JWR, et al. Family integrated care in single family rooms for preterm infants and late-onset sepsis: a retrospective study and mediation analysis. *Pediatr Res*. 2020 Oct;88(4):593–600.
138. van Veenendaal NR, van der Schoor SRD, Broekman BFP, de Groof F, van Laerhoven H, van den Heuvel MEN, et al. Association of a Family Integrated Care Model With Paternal Mental Health Outcomes During Neonatal Hospitalization. *JAMA Netw Open*. 2022 Jan 24;5(1):e2144720.
139. Vietri NJ, Dooley DP, Davis CE, Longfield JN, Meier PA, Whelen AC. The effect of moving to a new hospital facility on the prevalence of methicillin-resistant *Staphylococcus aureus*. *Am J Infect Control*. 2004 Aug;32(5):262–7.
140. Vohr B, McGowan E, McKinley L, Tucker R, Keszler L, Alksninis B. Differential Effects of the Single-Family Room Neonatal Intensive Care Unit on 18- to 24-Month Bayley Scores of Preterm Infants. *J Pediatr*. 2017 Jun;185:42-48.e1.
141. Voigt J, Mosier M, Darouiche R. Private Rooms in Low Acuity Settings: A Systematic Review of the Literature. *HERD*. 2018 Jan;11(1):57–74.
142. Walsh WF, McCullough KL, White RD. Room for improvement: nurses’ perceptions of providing care in a single room newborn intensive care setting. *Adv Neonatal Care*. 2006 Oct;6(5):261–70.
143. Washam MC, Ankrum A, Haberman BE, Staat MA, Haslam DB. Risk Factors for *Staphylococcus aureus* Acquisition in the Neonatal Intensive Care Unit: A Matched Case-Case-Control Study. *Infect Control Hosp Epidemiol*. 2018 Jan;39(1):46–52.

1  
2  
3  
4  
5  
6  
7  
8  
9  
10  
11  
12  
13  
14  
15  
16  
17  
18  
19  
20  
21  
22  
23  
24  
25  
26  
27  
28  
29  
30  
31  
32  
33  
34  
35  
36  
37  
38  
39  
40  
41  
42  
43  
44  
45  
46  
47



144. Watson J, DeLand M, Gibbins S, MacMillan York E, Robson K. Improvements in Staff Quality of Work Life and Family Satisfaction Following the Move to Single-Family Room NICU Design. *Advances in Neonatal Care*. 2014 Apr;14(2):129–36.

145. Zaal IJ, Spruyt CF, Peelen LM, van Eijk MMJ, Wientjes R, Schneider MME, et al. Intensive care unit environment may affect the course of delirium. *Intensive Care Med*. 2013 Mar;39(3):481–8.

For peer review only

## Appendix: Search Strategy

### 1. Searches

We ran systematic searches of Medline via PubMed and Embase via embase.com and supplemented these databases with additional searches of Google Scholar and the National Institute for Health and Care Excellence website using the search strategy below.

#### Embase search strategy

|   | Search terms                                                                                                                                             | Number of hits (17 Feb 2022) |
|---|----------------------------------------------------------------------------------------------------------------------------------------------------------|------------------------------|
| 1 | 'hospital design'/exp OR 'hospital design' OR 'hospital management'/exp OR 'hospital management' OR 'health care facility'/exp OR 'health care facility' | 2,538,404                    |
| 2 | (single OR multi*) NEAR/2 (room* OR bay* OR bed* OR accommodation)                                                                                       | 6,553                        |
| 3 | 1 AND 2                                                                                                                                                  | 2,005                        |

#### PubMed search strategy

|   | Search terms                                                                                                       | Number of hits (17 Feb 2022) |
|---|--------------------------------------------------------------------------------------------------------------------|------------------------------|
| 1 | "Hospital Design and Construction"[Mesh] OR "Hospital Administration"[Mesh] OR "Health Facility Environment"[Mesh] | 289,082                      |
| 2 | ((single OR multiple) AND (room OR room* OR bay OR bays OR bed OR beds OR accommodation))                          | 70,205                       |
| 3 | 1 AND 2                                                                                                            | 2,599                        |

#### Google scholar search strategy

|   | Search terms                                                                      | Number of hits (14 Feb 2022) |
|---|-----------------------------------------------------------------------------------|------------------------------|
| 1 | Hospital AND ("single room" OR "multiple room" OR "single bed" OR "multiple bay") | 42                           |

#### NICE website

|   | Search terms  | Number of hits (14 Feb 2022) |
|---|---------------|------------------------------|
| 1 | "single room" | 215                          |

We have used NICE's online Evidence Search tool (<https://www.evidence.nhs.uk>).

This search strategy yields **4,563 abstracts for screening** after deduplication, once the additional sources have been included.

## 2. Inclusion criteria

The inclusion criteria for the review are set out below.

| Criterion                    | Inclusion criterion                                                                                                                                                                                                                                                                                                                                                                                                                                                                                                                                                                                                                | Exclusion criterion                                                                                                                                                                                                                                         |
|------------------------------|------------------------------------------------------------------------------------------------------------------------------------------------------------------------------------------------------------------------------------------------------------------------------------------------------------------------------------------------------------------------------------------------------------------------------------------------------------------------------------------------------------------------------------------------------------------------------------------------------------------------------------|-------------------------------------------------------------------------------------------------------------------------------------------------------------------------------------------------------------------------------------------------------------|
| <b>Population</b>            | <p>Adults, adolescents or children who are inpatients in an acute hospital for more than 24 hours</p> <p>Includes:</p> <ul style="list-style-type: none"> <li>Those requiring level 0 or 1 care</li> <li>Neonates, children and young adults (everyone under age 18)</li> <li>Pregnant/labouring women</li> <li>Vulnerable adults (those requiring assistance while living in the community)</li> <li>Those with dementia or delirium</li> <li>Those requiring level 2 or 3 care</li> <li>Those primarily receiving rehabilitation</li> <li>Those admitted for elective care</li> <li>Those admitted for emergency care</li> </ul> | <p>Patients admitted to long-stay, community or other non-acute hospitals</p> <p>Patients admitted as day cases to an acute hospital</p> <p>Patients attending Accident and Emergency or medical assessment units but not admitted to an acute hospital</p> |
| <b>Interventions</b>         | Staying in a single room for the whole admission                                                                                                                                                                                                                                                                                                                                                                                                                                                                                                                                                                                   | Patients who are relocated to a single room during their admission (e.g. for isolation due to contracting infectious disease or for terminal care)                                                                                                          |
| <b>Comparison</b>            | Staying in a multi-bed bay or room                                                                                                                                                                                                                                                                                                                                                                                                                                                                                                                                                                                                 | No direct comparison                                                                                                                                                                                                                                        |
| <b>Outcomes</b>              | <ul style="list-style-type: none"> <li>In-hospital mortality</li> <li>30-day, or longer, mortality</li> <li>Morbidity such as falls, deterioration, new pressure ulcers and additional diagnoses</li> <li>Experience of patient safety incidents</li> <li>Hospital-acquired infection</li> <li>Quantitative, qualitative and patient-reported measures of experience</li> <li>Length of stay</li> <li>Cost of stay</li> <li>Experience of accommodation change during admission, or number of bed moves during admission</li> <li>Impact on caregivers and family of dependent patient</li> </ul>                                  | <p>Non-clinically relevant outcomes</p> <p>Impact on healthcare professionals and support staff</p>                                                                                                                                                         |
| <b>Study methodology</b>     | <ul style="list-style-type: none"> <li>Comparative clinical trials and observational studies</li> <li>Systematic reviews of relevant studies</li> <li>Study protocols: index separately</li> </ul>                                                                                                                                                                                                                                                                                                                                                                                                                                 | <ul style="list-style-type: none"> <li>Non-comparative observational studies</li> <li>Narrative reviews, opinion pieces, letters, editorials</li> <li>Conference abstracts with no relevant data</li> </ul>                                                 |
| <b>Study size</b>            | Any                                                                                                                                                                                                                                                                                                                                                                                                                                                                                                                                                                                                                                |                                                                                                                                                                                                                                                             |
| <b>Language and location</b> | Any                                                                                                                                                                                                                                                                                                                                                                                                                                                                                                                                                                                                                                |                                                                                                                                                                                                                                                             |

### 3. Studies excluded at full text screening

| Citation                                                                                                                                                                                                                                                                                                                                                                           | Reason for exclusion                 |
|------------------------------------------------------------------------------------------------------------------------------------------------------------------------------------------------------------------------------------------------------------------------------------------------------------------------------------------------------------------------------------|--------------------------------------|
| Adabi, G. <i>et al.</i> (2019). Barriers to sleep in patients hospitalised with an acute exacerbation of chronic obstructive pulmonary disease. <i>J Sleep Res.</i> 28(SUPPL 1).                                                                                                                                                                                                   | Outcome: No relevant data reported   |
| Alzheimer's Disease International (2020) World Alzheimer Report 2020 Design Dignity Dementia: dementia-related design and the built environment, Volume 1 <a href="https://www.alzint.org/u/WorldAlzheimerReport2020Vol1.pdf">https://www.alzint.org/u/WorldAlzheimerReport2020Vol1.pdf</a>                                                                                        | Outcome: No relevant data reported   |
| Baillie, J. (2015). Hospitals single-room design evaluated. <i>Health Estate</i> 69(1): 27-30.                                                                                                                                                                                                                                                                                     | Irretrievable                        |
| Bernhardt, J. and Cumming, T. (2013). The elephant in the single room debate: keeping patients active. <i>BMJ Clin Res Ed.</i> 347.                                                                                                                                                                                                                                                | Outcome: No relevant data reported   |
| Dean, E. (2010). Patient opinion divided on the introduction of single rooms. <i>Nurs Stand.</i> 24(40): 12-13.                                                                                                                                                                                                                                                                    | Outcome: No relevant data reported   |
| Dean, E. (2015). Study finds ideal ward has a mix of single rooms and multi-bed bays. <i>Nurs Stand.</i> 29(28): 11.                                                                                                                                                                                                                                                               | Outcome: No relevant data reported   |
| Dulny, G. <i>et al.</i> (2013). An analysis of risk factors of <i>Clostridium difficile</i> infection in patients hospitalized in the teaching hospital in 2008. <i>Przegląd epidemiologiczny</i> 67(3): 445-50, 547-51.                                                                                                                                                           | Intervention: No data on single room |
| Kelly, R. <i>et al.</i> (2019). The experience of person-centred practice in a 100% single-room environment in acute care settings-A narrative literature review. <i>J Clin Nurs.</i> 28(13-14): 2369-2385.                                                                                                                                                                        | Outcome: No relevant data reported   |
| Lerner, A. O. <i>et al.</i> (2019). Environmental contamination by carbapenem-resistant <i>Acinetobacter baumannii</i> : The effects of room type and cleaning methods. <i>Infect Control Hosp Epidemiol.</i> 41(2): 166-171.                                                                                                                                                      | Outcome: No relevant data reported   |
| Li, M. <i>et al.</i> (2020). Construction and application of three-dimensional evaluation model of single bed efficiency in hospital. <i>Chin J Hosp Admin:</i> 127-130.                                                                                                                                                                                                           | Irretrievable                        |
| Linqvist Leonardsen, AC <i>et al.</i> (2016). A qualitative study of patient experiences of decentralized acute healthcare services. <i>Scand J Prim Health Care</i> 34(3): 317-324.                                                                                                                                                                                               | Population: not acute hospital       |
| Mental Welfare Commission for Scotland (2015) Making progress: older functional assessment wards. <a href="https://www.mwscot.org.uk/sites/default/files/2019-06/making_progress_older_adult_functional_assessment_wards.pdf">https://www.mwscot.org.uk/sites/default/files/2019-06/making_progress_older_adult_functional_assessment_wards.pdf</a>                                | Outcome: No relevant data reported   |
| NIHR Evidence (2015) NIHR Alert: One size does not fit all – evaluating the move to a hospital with 100% single rooms. <a href="https://evidence.nihr.ac.uk/alert/one-size-does-not-fit-all-evaluating-the-move-to-a-hospital-with-100-single-rooms/">https://evidence.nihr.ac.uk/alert/one-size-does-not-fit-all-evaluating-the-move-to-a-hospital-with-100-single-rooms/</a>     | Secondary to Maben 2016 #1802        |
| NIHR Journals Library Health Services and Delivery Research (2015) Evaluating a major innovation in hospital design: workforce implications and impact on patient and staff experiences of all single room hospital accommodation. <a href="https://www.journalslibrary.nihr.ac.uk/hsdr/hsdr03030/#/abstract">https://www.journalslibrary.nihr.ac.uk/hsdr/hsdr03030/#/abstract</a> | Duplicate of Maben 2015 #1804        |
| Oliver, D. (2021). David Oliver: Should single rooms be the default for NHS inpatients? <i>BMJ</i> 375:n2612.                                                                                                                                                                                                                                                                      | Outcome: No relevant data reported   |
| Pennington, H. and Isles, C. (2013). Should hospitals provide all patients with single rooms? <i>BMJ</i> 347: f5695.                                                                                                                                                                                                                                                               | Outcome: No relevant data reported   |



| Citation                                                                                                                                                                                                                                                                                                                                                                                                                                                                                                                       | Reason for exclusion                                    |
|--------------------------------------------------------------------------------------------------------------------------------------------------------------------------------------------------------------------------------------------------------------------------------------------------------------------------------------------------------------------------------------------------------------------------------------------------------------------------------------------------------------------------------|---------------------------------------------------------|
| Ali, E. (2020) Single-room maternity care: Systematic review and narrative synthesis. <i>Nurs Open</i> . 7(6):1661-1670.<br><a href="https://pubmed.ncbi.nlm.nih.gov/33072349">https://pubmed.ncbi.nlm.nih.gov/33072349</a>                                                                                                                                                                                                                                                                                                    | SLR: citation chase                                     |
| Royal College of Psychiatrists (2020) Next steps for funding mental healthcare in England: Infrastructure. Version 2 <a href="https://www.rcpsych.ac.uk/docs/default-source/improving-care/better-mh-policy/policy/next-steps-for-funding-mental-healthcare---infrastructure-royal-college-of-psychiatrists-august-2020.pdf">https://www.rcpsych.ac.uk/docs/default-source/improving-care/better-mh-policy/policy/next-steps-for-funding-mental-healthcare---infrastructure-royal-college-of-psychiatrists-august-2020.pdf</a> | Outcome: No relevant data reported                      |
| Russo, PL <i>et al.</i> (2018). Establishing the prevalence of healthcare-associated infections in Australian hospitals: Protocol for the Comprehensive Healthcare Associated Infection National Surveillance (CHAINS) study. <i>BMJ Open</i> 8(11).                                                                                                                                                                                                                                                                           | Outcome: No relevant data reported                      |
| Semret, M. <i>et al.</i> (2016). Cleaning the grey zones of hospitals: A prospective, crossover, interventional study. <i>Am J Infect Control</i> 44(12): 1582-1588.                                                                                                                                                                                                                                                                                                                                                           | Intervention: No data on single room                    |
| Sengupta, S. <i>et al.</i> (2021). Not All Multi.drug Resistant Organism (MDRO)S are Alike-Lessons from Candida Auris in Singapore. <i>Antimicrobial Resistance and Infection Control</i> 10(SUPPL 2).                                                                                                                                                                                                                                                                                                                         | Outcome: No relevant data reported                      |
| Shannon, MM. <i>et al.</i> (2019). Can the physical environment itself influence neurological patient activity? <i>Disabil Rehabil</i> . 41(10): 1177-1189.                                                                                                                                                                                                                                                                                                                                                                    | Intervention: No data on single room                    |
| Simon, M. <i>et al.</i> (2016). Is single room hospital accommodation associated with differences in healthcare-associated infection, falls, pressure ulcers or medication errors? A natural experiment with non-equivalent controls. <i>J Health Serv Res Policy</i> 21(3): 147-155.                                                                                                                                                                                                                                          | Secondary publication to Maben 2016, no additional data |
| Teo, R. <i>et al.</i> (2015). Patients' preference: Single rooms or shared wards? <i>Scottish Med J</i> 59(4): e40.                                                                                                                                                                                                                                                                                                                                                                                                            | Outcome: No relevant data reported                      |
| Welsh Government (2020) National care review of NHS learning disability hospitals provision <a href="https://gov.wales/sites/default/files/publications/2020-03/national-care-review-of-learning-disabilities-hospital-inpatient-provision.pdf">https://gov.wales/sites/default/files/publications/2020-03/national-care-review-of-learning-disabilities-hospital-inpatient-provision.pdf</a>                                                                                                                                  | Outcome: No relevant data reported                      |
| Fairhall, K. <i>et al.</i> (2009). Single-bed versus multi-bed hospital rooms: The case for patient safety. <i>World Health Design</i> 7: 57-61.                                                                                                                                                                                                                                                                                                                                                                               | Irretrievable                                           |
| BaHammam, A. (2006). Sleep quality of patients with acute myocardial infarction outside the ccu environment: A preliminary study. <i>Med Sci Monit</i> 12(4): CR168-CR172.                                                                                                                                                                                                                                                                                                                                                     | Outcome: No relevant data reported                      |
| Harris, S., Farren, M., Janssen, P., Klein, M., & Lee, S. (2004). Single room maternity care offers an efficient and physician friendly environment, without compromising perinatal outcomes. <i>J Obstet Gynecol Canada</i> 26, 633-640.                                                                                                                                                                                                                                                                                      | Irretrievable                                           |
| Ishii, H. <i>et al.</i> (2007). Advantages of silent and air-conditioned environment on polysomnography. <i>Respir Circul</i> 55(2): 233-236.                                                                                                                                                                                                                                                                                                                                                                                  | Irretrievable                                           |
| Isles, LF., Flynn, R., & Isles, C. (2009). Patient preferences for single rooms or shared accommodation in a district general hospital. <i>Scottish Med J</i> . 54, 5-8.                                                                                                                                                                                                                                                                                                                                                       | DUPLICATE                                               |
| Jones, R. <i>et al.</i> (2016). The effects of single-family rooms on parenting behavior and maternal psychological factors. <i>J Obstet Gynecol Neonatal Nurs</i> 45(3): 359-370.                                                                                                                                                                                                                                                                                                                                             | Irretrievable                                           |
| Feeley, N. <i>et al.</i> (2020). A comparative study of mothers of infants hospitalized in an open ward neonatal intensive care unit and a combined pod and single-family room design. <i>BMC Pediatrics</i> 20(1).                                                                                                                                                                                                                                                                                                            | Outcome: No relevant data reported                      |
| Herr, CE. <i>et al.</i> (2003). Additional costs for preventing the spread of methicillin-resistant <i>Staphylococcus aureus</i> and a strategy for reducing these costs on a surgical ward. <i>Infect Control Hosp Epidemiol</i> 24(9): 673-678.                                                                                                                                                                                                                                                                              | Intervention: No data on single room                    |

| Citation                                                                                                                                                                                                                                                                                                                                                                                         | Reason for exclusion                       |
|--------------------------------------------------------------------------------------------------------------------------------------------------------------------------------------------------------------------------------------------------------------------------------------------------------------------------------------------------------------------------------------------------|--------------------------------------------|
| Hurst, K. (2009). Do single rooms require more staff than other wards? <i>Nurs Stand</i> 24(4): 16.                                                                                                                                                                                                                                                                                              | Population: only data is on staff workload |
| Jobe, AH. (2017). The single-family room neonatal intensive care unit – critical for improving outcomes? <i>J Pediatr</i> 185: 10-12.                                                                                                                                                                                                                                                            | Outcome: No relevant data reported         |
| Joshi, R. <i>et al.</i> (2018). Does the architectural layout of a NICU affect alarm pressure? A comparative clinical audit of a single-family room and an open bay area NICU using a retrospective study design. <i>BMJ Open</i> 8(6): e022813.                                                                                                                                                 | Outcome: No relevant data reported         |
| Langley, JM. and Hanakowski, M. (2000). Variation in risk for nosocomial chickenpox after inadvertent exposure. <i>J Hosp Infect</i> 44(3): 224-226.                                                                                                                                                                                                                                             | Outcome: No relevant data reported         |
| McKinley, LT. <i>et al.</i> (2022). Implementation of a nutrition care bundle and improved weight gain of extremely preterm infants to 36 weeks postmenstrual age. <i>J Pediatr</i> 241: 42-47.e42.                                                                                                                                                                                              | Outcome: No relevant data reported         |
| Mental Welfare Commission for Scotland (2018) Young person monitoring report 2017-2018 <a href="https://www.mwscot.org.uk/sites/default/files/2019-06/young_person_monitoring_report_2017-18.pdf">https://www.mwscot.org.uk/sites/default/files/2019-06/young_person_monitoring_report_2017-18.pdf</a>                                                                                           | Outcome: No relevant data reported         |
| National Nursing Research Unit (2009) Policy + Issue 17: Splendid Isolation? The pros and cons of single occupancy rooms for the NHS <a href="https://www.kcl.ac.uk/nmpc/research/nru/policy/policy-plus-issues-by-theme/hownursingcareisdelivered/policyissue17.pdf">https://www.kcl.ac.uk/nmpc/research/nru/policy/policy-plus-issues-by-theme/hownursingcareisdelivered/policyissue17.pdf</a> | METHOD                                     |
| Pellikka, HK. <i>et al.</i> (2020). Finnish parents' responsibilities for their infant's care when they stayed in a single family room in a neonatal intensive care unit. <i>J Pediatr Nurs</i> 53: e28-e34.                                                                                                                                                                                     | Outcome: No relevant data reported         |
| Rose, P. and Blythe, S. (2008). Use of single rooms on the children's ward: Part 1. <i>Paediatr Nurs</i> 20(10): 13-17.                                                                                                                                                                                                                                                                          | SLR                                        |
| Rose, P. and Blythe, S. (2009). Use of single rooms on the children's ward, Part 2: Guideline for practice. <i>Paediatr Nurs</i> 21(1): 31-35.                                                                                                                                                                                                                                                   | Outcome: No relevant data reported         |
| Saha, S. <i>et al.</i> (2022). Mapping the impact of ICU design on patients, families and the ICU team: A scoping review. <i>J Crit Care</i> 67: 3-13.                                                                                                                                                                                                                                           | SLR                                        |
| Serval, AC. and Rideau Batista Novais, A. (2016). [Single-family rooms for neonatal intensive care units impacts on preterm newborns, families, and health-care staff. A systematic literature review]. <i>Arch Pediatr</i> 23(9): 921-926.                                                                                                                                                      | SLR                                        |
| Shahheidari, M. and Homer, C. (2012). Impact of the design of neonatal intensive care units on neonates, staff, and families: a systematic literature review. <i>J Perinat Neonat Nurs</i> 26(3): 260-266.                                                                                                                                                                                       | SLR                                        |
| Shin, JH. <i>et al.</i> (2000). Nosocomial cluster of <i>Candida lipolytica</i> fungemia in pediatric patients. <i>Eur J Clin Microbiol Infect Dis</i> 19(5): 344-349.                                                                                                                                                                                                                           | Intervention: No data on single room       |
| Soleimani, F. <i>et al.</i> (2020). Impacts of the design of a neonatal intensive care unit (single-family room care and open-ward care) on clinical and environmental outcomes. <i>Crescent J Med Biol Sci</i> 7(1): 1-6.                                                                                                                                                                       | SLR                                        |
| Stolker, JJ. <i>et al.</i> (2006). Are patients' views on seclusion associated with lack of privacy in the ward? <i>Arch Psychiatr Nurs</i> 20(6): 282-7.                                                                                                                                                                                                                                        | Outcome: No relevant data reported         |
| Tse, Y. (2013). Children thrive on companionship, not single rooms. <i>BMJ Clin. Res. Ed.</i> 347: f6335.                                                                                                                                                                                                                                                                                        | METHOD                                     |
| van de Glind, I. <i>et al.</i> (2007). Do patients in hospitals benefit from single rooms? A literature review. <i>Health Policy</i> 84(2-3): 153-161.                                                                                                                                                                                                                                           | SLR                                        |

| Citation                                                                                                                                                                                                                                                                                                                              | Reason for exclusion                               |
|---------------------------------------------------------------------------------------------------------------------------------------------------------------------------------------------------------------------------------------------------------------------------------------------------------------------------------------|----------------------------------------------------|
| Van Eijk, M. <i>et al.</i> (2010). Quality and quantity of sleep in multiple versus single patient room intensive care units. <i>Intensive Care Med</i> 36: S189.                                                                                                                                                                     | Outcome: No relevant data reported                 |
| van Veenendaal, NR. <i>et al.</i> (2019). Hospitalising preterm infants in single family rooms versus open bay units: a systematic review and meta-analysis. <i>Lancet Child Adolesc Health</i> 3(3): 147-157.                                                                                                                        | SLR                                                |
| van Veenendaal, NR. <i>et al.</i> (2020). Hospitalising preterm infants in single family rooms versus open bay units: A systematic review and meta-analysis of impact on parents. <i>EClinicalMedicine</i> 23.                                                                                                                        | SLR                                                |
| Vohr, BR. (2019). The importance of parent presence and involvement in the single-family room and open-bay NICU. <i>Acta Paediatr</i> 108(6): 986-988.                                                                                                                                                                                | METHOD                                             |
| WHO Regional Office for Europe – WHO Europe (2009) Capital investment for health. Case studies from Europe (2009)<br><a href="https://www.euro.who.int/__data/assets/pdf_file/0014/43322/E92798.pdf">https://www.euro.who.int/__data/assets/pdf_file/0014/43322/E92798.pdf</a>                                                        | METHOD                                             |
| Yamaguchi, K. <i>et al.</i> (2019). A Study on Operation Architectural Design and Planning of Single-Room PICU in JAPAN Children’s Hospital. Sustainable Urban Environments: Research, Design and Planning for the Next 50 Years, EDRA.                                                                                               | Outcome: No relevant data reported                 |
| Bigazzi, E., Turrisi, L., Zagli, G., Pecile, P., Bonizzoli, M., Peris, A. (2010). Bay rooms vs single-bed rooms in intensive care unit nosocomial infections: a case-control study. <i>CritCare</i> 14(Suppl.1):P458-<br>P. <a href="http://dx.doi.org/10.1186/cc8690">http://dx.doi.org/10.1186/cc8690</a> [PubMedPMID: PMC2934264]. | Outcome: No relevant data reported                 |
| Stevens, D., Thompson, P., Helseth, C., Pottala, J., Khan, M., Munson, D. (2011). A comparison of outcomes of care in an open bay and single family room neonatal intensive care facility. <i>J Neonat Perinat Med</i> 4: 189–200.                                                                                                    | Irretrievable                                      |
| Gotlieb, JB. (2000). Understanding the effects of nurses, patients’ hospital rooms and patients’ perception of control on the perceived quality of a hospital. <i>Health Mark Q</i> 18:1–14.                                                                                                                                          | Outcome: No relevant data reported                 |
| Hamel, M., Zoutman, D., O’Callaghan, C. (2010). Exposure to hospital roommates as a risk factor for health care–associated infection. <i>Am J Infect Control</i> 38:173–81.                                                                                                                                                           | Intervention: No data on single room               |
| Heddema, ER. & van Benthem, BHB. (2011). Decline in incidence of <i>Clostridium difficile</i> infection after relocation to a new hospital building with single rooms. <i>J Hosp Infect</i> 79, 93–98.                                                                                                                                | METHOD                                             |
| Okeke, J., Daniel, J., Naseem, A. <i>et al.</i> (2013). Impact of all single rooms with ensuite facility in an acute care hospital in Wales (UK). <i>Age Ageing</i> 42(Suppl 3):iii1–11.                                                                                                                                              | Outcome: No relevant data reported                 |
| Okeke, J., Aithal, S., Edwards, C., Ramakrishna, S., & Singh, I. (2014). Outcome of inpatient falls in single bedded and multi-bedded bays. <i>Age Ageing</i> 43, ii1–ii11. <a href="https://doi.org/10.1093/ageing/afu124">https://doi.org/10.1093/ageing/afu124</a> .                                                               | Outcome: No relevant data reported                 |
| Shaughnessy, MK., Micielli, RL., DePestel, DD. <i>et al.</i> (2011) Evaluation of hospital room assignment and acquisition of <i>Clostridium difficile</i> infection. <i>Infect Control Hosp Epidemiol</i> 32(3):201–6. [PubMed: 21460503]                                                                                            | Intervention: No data on single room               |
| Shepley, MM., Harris, DD., White, R. (2008). Open-bay and single family room neonatal intensive care units – caregiver satisfaction and stress. <i>Environ Behav</i> 40(2):249–268.                                                                                                                                                   | Population: Impact on staff only                   |
| Singh, I., Edwards, C., Okeke, J. (2015). Impact of cognitive impairment on inpatient falls in single room setting and its adverse outcomes. <i>J Gerontol Geriatr Res</i> S4. S4eS001.                                                                                                                                               | Secondary publication of Singh 2015, no additional |

| Citation                                                                                                                                                                                                                                         | Reason for exclusion                     |
|--------------------------------------------------------------------------------------------------------------------------------------------------------------------------------------------------------------------------------------------------|------------------------------------------|
|                                                                                                                                                                                                                                                  | relevant data about single rooms         |
| Ulrich, RS. (2006). Effects of single versus multi-bed accommodation and outcomes. Presented at the Symposium on Single-Bed Ward Accommodation, Cardiff, Wales.                                                                                  | METHOD                                   |
| van Oel, CJ., Mlihi, M., & Freeke, A. (2021). Design models for single patient rooms tested for patient preferences. <i>HERD</i> , 14(1), 31-46. <a href="https://doi.org/10.1177/1937586720937995">https://doi.org/10.1177/1937586720937995</a> | Outcome: No relevant data reported       |
| Williams, C., & Gardiner, C. (2015). Preference for a single or shared room in a UK inpatient hospice: Patient, family and staff perspectives. <i>BMJ Support Palliat Care</i> 5, 169–174. doi: 10.1136/bmjspcare-2013-000514                    | Population: hospice – not acute hospital |

# BMJ Open

**The clinical, humanistic, and economic outcomes, including experiencing of patient safety events, associated with admitting patients to single rooms compared with shared accommodation for acute hospital admissions. A systematic review and narrative synthesis**

|                                 |                                                                                                                                                                                                                                                                                                                                                                                                                                                                                                                                    |
|---------------------------------|------------------------------------------------------------------------------------------------------------------------------------------------------------------------------------------------------------------------------------------------------------------------------------------------------------------------------------------------------------------------------------------------------------------------------------------------------------------------------------------------------------------------------------|
| Journal:                        | <i>BMJ Open</i>                                                                                                                                                                                                                                                                                                                                                                                                                                                                                                                    |
| Manuscript ID                   | bmjopen-2022-068932.R1                                                                                                                                                                                                                                                                                                                                                                                                                                                                                                             |
| Article Type:                   | Original research                                                                                                                                                                                                                                                                                                                                                                                                                                                                                                                  |
| Date Submitted by the Author:   | 16-Feb-2023                                                                                                                                                                                                                                                                                                                                                                                                                                                                                                                        |
| Complete List of Authors:       | Bertuzzi, Andrea; Crystallise Ltd<br>Martin, Alison; Crystallise Ltd<br>Clarke, Nicola; Crystallise Ltd<br>Springate, Cassandra; Crystallise Ltd<br>Ashton, Rachel; Ashton Editorial Consulting; NHS England and NHS Improvement Midlands The Health Economics Unit,<br>Smith, Wayne; NHS England and NHS Improvement Midlands The Health Economics Unit<br>Orlowski, Andi; Health Economics Unit; Imperial College London, Department of Primary Care and Public Health<br>McPherson, Duncan; NHS England, New Hospital Programme |
| <b>Primary Subject Heading</b>: | Health services research                                                                                                                                                                                                                                                                                                                                                                                                                                                                                                           |
| Secondary Subject Heading:      | Health policy                                                                                                                                                                                                                                                                                                                                                                                                                                                                                                                      |
| Keywords:                       | Economics < TROPICAL MEDICINE, Health policy < HEALTH SERVICES ADMINISTRATION & MANAGEMENT, HEALTH ECONOMICS, Organisation of health services < HEALTH SERVICES ADMINISTRATION & MANAGEMENT, Quality in health care < HEALTH SERVICES ADMINISTRATION & MANAGEMENT                                                                                                                                                                                                                                                                  |
|                                 |                                                                                                                                                                                                                                                                                                                                                                                                                                                                                                                                    |

SCHOLARONE™  
Manuscripts

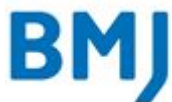

I, the Submitting Author has the right to grant and does grant on behalf of all authors of the Work (as defined in the below author licence), an exclusive licence and/or a non-exclusive licence for contributions from authors who are: i) UK Crown employees; ii) where BMJ has agreed a CC-BY licence shall apply, and/or iii) in accordance with the terms applicable for US Federal Government officers or employees acting as part of their official duties; on a worldwide, perpetual, irrevocable, royalty-free basis to BMJ Publishing Group Ltd ("BMJ") its licensees and where the relevant Journal is co-owned by BMJ to the co-owners of the Journal, to publish the Work in this journal and any other BMJ products and to exploit all rights, as set out in our [licence](#).

The Submitting Author accepts and understands that any supply made under these terms is made by BMJ to the Submitting Author unless you are acting as an employee on behalf of your employer or a postgraduate student of an affiliated institution which is paying any applicable article publishing charge ("APC") for Open Access articles. Where the Submitting Author wishes to make the Work available on an Open Access basis (and intends to pay the relevant APC), the terms of reuse of such Open Access shall be governed by a Creative Commons licence – details of these licences and which [Creative Commons](#) licence will apply to this Work are set out in our licence referred to above.

Other than as permitted in any relevant BMJ Author's Self Archiving Policies, I confirm this Work has not been accepted for publication elsewhere, is not being considered for publication elsewhere and does not duplicate material already published. I confirm all authors consent to publication of this Work and authorise the granting of this licence.

1  
2  
3  
4  
5  
6  
7  
8  
9  
10  
11  
12

# The clinical, humanistic, and economic outcomes, including experiencing of patient safety events, associated with admitting patients to single rooms compared with shared accommodation for acute hospital admissions. A systematic review and narrative synthesis.

13  
14  
15  
16  
17  
18  
19  
20  
21  
22  
23  
24  
25  
26  
27  
28  
29  
30  
31  
32  
33  
34  
35  
36  
37  
38  
39  
40  
41  
42  
43  
44  
45  
46  
47  
48  
49  
50  
51  
52  
53  
54  
55  
56  
57  
58  
59  
60

## Authors

Andrea Bertuzzi,<sup>2</sup> Alison Martin (0000-0003-4660-278X),<sup>2</sup> Nicola Clarke,<sup>2</sup> Cassandra Springate (0000-0003-1846-6901),<sup>2</sup> Rachel Ashton (0000-0003-1755-7975),<sup>3</sup> Wayne Smith (0000-0002-4297-1978),<sup>3</sup> Andi Orłowski (0000-0002-1463-9206),<sup>3</sup> Duncan McPherson (0000-0002-2560-8552)<sup>1</sup>

<sup>1</sup>New Hospital Programme, NHS England and Improvement, Skipton House, 80 London Road, London SE1 6LH, UK

<sup>2</sup>Crystallise Ltd, 17 High Street, Stanford le Hope, Essex SS17 0HD, UK

<sup>3</sup>The Health Economics Unit, NHS Midlands and Lancashire Commissioning Support Unit, Heron House, 120 Grove Road, Stoke on Trent ST4 4LX, UK

Correspondence to: Dr Duncan McPherson, NHS England and Improvement, Skipton House, 80 London Road, London, SE1 6LH. [duncan.mcpherson1@nhs.net](mailto:duncan.mcpherson1@nhs.net).

Word count, excluding title page, abstract, references, figures and tables 7221

## Abstract

**Objectives:** Assess the impact of single rooms versus multioccupancy accommodation on inpatient health-care outcomes and processes.

**Design:** Systematic review and narrative synthesis.

**Data Sources:** Medline, Embase, Google Scholar and the National Institute for Health and Care Excellence website up to 17 February 2022.

**Eligibility Criteria:** Eligible papers assessed the effect on inpatients staying in hospital of being assigned to either a single room or shared accommodation, except where that assignment was for a direct clinical reason like preventing infection spread.

**Data extraction and synthesis:** Data were extracted and synthesised narratively, according to the methods of Campbell et al.

**Results:** Of 4,861 citations initially identified, 145 were judged to be relevant to this review. Five main method types were reported. All studies had methodological issues that potentially biased the results by not adjusting for confounding factors that are likely to have contributed to the outcomes. Ninety-two papers compared clinical outcomes for patients in single rooms versus shared accommodation. No clearly consistent conclusions could be drawn about overall benefits of single rooms. Single rooms were most likely to be associated with a small overall clinical benefit for the most severely ill patients, especially neonates in intensive care. Patients who preferred single rooms tended to do so for privacy, and for reduced disturbances. By contrast, some groups were more likely to prefer shared accommodation to avoid loneliness. Greater costs associated with building single rooms were small and likely to be recouped over time by other efficiencies.

**Conclusions:** The lack of difference between inpatient accommodation types in a large number of studies suggests that there would be little effect on clinical outcomes, particularly in routine care. Patients in intensive care areas are most likely to benefit from single rooms. Most patients preferred single rooms for privacy and some preferred shared accommodation for avoiding loneliness.

## Strengths and Limitations

- This study is a systematic review of a very large, diverse set of papers
- It addresses a topic that is directly of interest to patients using both traditional clinical and patient reported outcomes
- Meta-analysis was not undertaken because of limitations in the underlying data

## Keywords

hospital design; hospital construction; hospital management; hospital administration; health care facility environment; single room; single accommodation; single bedroom; multiple bedroom; single bedroom; multiple bedroom; multiple accommodation; multiple beds



## Introduction

Hospital bed capacity in England has roughly halved over the past 30 years.[1] With pledges from the UK government to replace, refurbish, or reconfigure NHS tens of hospitals by 2030.[2] There is an opportunity not only to increase bed numbers but also to choose accommodation types: a single rooms or multioccupancy spaces, or a mixture of both. It is important to get this right at the start, as once each hospital is built it is difficult to change the proportion of single rooms to shared accommodation. However, there is no settled, obvious evidence base on which to base decisions.[3] Arguments for building exclusively single rooms include patients' dignity and control over the environment and improved infection control, while those against cite the importance of some patients' preference for company (particularly during longer stays), feelings of safety being in the presence of other patients, and, of note, the lack of understanding about infection control in single rooms.[4,5]

For some situations isolation of the patient in a single room is part of the clinical intervention. For example, a patient with severe immune compromise may be isolated to protect them from acquiring infection. Similarly, patients with highly transmissible infections may be isolated to prevent spread of infection. A single room is also used where privacy is extremely important, for example delivery units on maternity wards or for dying patients and their families. For most patients, though, there are ranges of risks and benefits and reasons for their preferences, including what would count as a good experience of hospital admission.[6]

This study set out to find published evidence to investigate whether inpatient stays in single rooms or in shared accommodation (i.e., multioccupancy rooms, bays, or wards), have been associated with any impact on the processes undertaken by the hospital and on patients' outcomes. A wide range of clinical, social, and economic outcomes were included from the primary perspective of patients across a range of acute hospital types. Staff perspectives, while not formally assessed, were included if reported as part of a study on patient and caregiver views. The objective was to compare staying in a single room versus shared accommodation for care in which the type of accommodation was not part of the intervention itself. This systematic review protocol has been registered with PROSPERO, registration number CRD42022311689. Ethics approval was not required for this study.

## Methods

### Identification of papers

We performed a systematic literature review of content in Medline (via PubMed) and Embase for comparative clinical trials, observational studies, and systematic literature reviews published in any language up to 17 February 2022. Additional searches were performed via Google Scholar and the National Institute for Health and Care Excellence. We used combinations of "hospital", "design", "management", "health care facility", "single", "multi", "room", "bay", "bed", and "accommodation", optimised for the search platform (see supplementary information – Appendix: Search Strategy). Eligible papers addressed care of adult and/or paediatric inpatients staying in hospital for routine, emergency, or intensive care and who were assigned to a particular accommodation type (single room or shared accommodation). We excluded papers that assessed long-stay patients, day patients, and those attending accident and emergency departments who were not later admitted to an acute hospital; patients who were relocated to a single room during admission (e.g., for isolation after contracting and infectious disease or for terminal care); no direct comparison condition for staying in a single room; non-clinical outcomes; and impact of care on health-care professionals and/or support staff. We also excluded narrative reviews, perspective papers, letters, editorials, and conference abstracts with no relevant data.

1  
2  
3 Retrieved abstracts were screened by two researchers (AB and NC) using the inclusion criteria in the  
4 appendix. Disagreements were resolved by discussion with the project leader. Shortlisted papers  
5 were retrieved as full texts. The reference lists of all papers included in this analysis were reviewed  
6 to identify any additional publications of primary research that met the inclusion criteria. Full papers  
7 were screened for relevance by two researchers (AB and AM) independently.  
8  
9

10 The quality of each paper was assessed by the same researcher using the Downs and Black checklist  
11 for observational studies[7] and the Joanna Briggs Institute checklists ([https://jbi.global/critical-](https://jbi.global/critical-appraisal-tools)  
12 [appraisal-tools](https://jbi.global/critical-appraisal-tools)) for qualitative studies and for systematic reviews. These checklists enable  
13 assessment of reporting quality, generalisability of findings, biases in measurements of intervention  
14 and outcome, confounding in the selection of participants, and power (whether negative findings  
15 could be the result of chance). Each quality assessment checklist score was converted to a  
16 percentage of the maximum possible score and were categorised for the purposes of this report into  
17 high (75–100%), moderate (50–74%), or low quality (<50%; see supplementary table 1).  
18  
19  
20  
21

## 22 **Data extraction and synthesis**

23 Data were extracted into an Excel spreadsheet and checked, with final adjudication by the project  
24 leader (AM), and were synthesised narratively, according to the methods of Campbell et al.[8] Data  
25 extracted from systematic literature reviews were cross-checked to avoid double-counting. The  
26 fields for extraction were study methodology, baseline characteristics of participants (when  
27 provided), clinical outcomes, non-clinical outcomes, resource use, and costs. The clinical outcomes  
28 of interest were in-hospital mortality, overall mortality ( $\geq 30$  days), morbidity (e.g., falls,  
29 deterioration, new pressure ulcers, and complications), patient safety incidents, and hospital-  
30 acquired infections. Non-clinical outcomes of interest were patient and family member experiences,  
31 length of stay, cost of stay, experience of accommodation change and number of changes (for the  
32 same type of care) during admission, and impact on the caregivers and family members of  
33 dependent patients. Outcomes were assessed based on the measures used in the original articles.  
34 Extracted data were sorted by outcome and then by population and setting. Relevant data for each  
35 outcome were summarised narratively by comparing heterogeneity across studies in terms of  
36 whether differences were statistically significant and in favour of single room or shared  
37 accommodation.  
38  
39  
40  
41  
42  
43

## 44 **Statistical analysis**

45 As substantial heterogeneity across studies (e.g., how data were reported, study methods, etc) was  
46 expected, formal meta-analysis was not deemed feasible. Thus, no formal measures of  
47 heterogeneity or overall effect size were performed, and all data reported are descriptive. To aid  
48 comparison and assess consistency of the conclusions, data are presented in summary tables.  
49  
50

51 Certainty of findings was assessed based on whether the direction of benefit was consistently  
52 statistically significant for single rooms or shared accommodation (across all studies or those with  
53 the lowest risk of bias) or was inconsistent or not statistically significant.  
54

55 There are special areas of hospitals where responses to the intervention might differ, such as  
56 intensive-care or paediatric units and areas for women in labour. Therefore, we aimed to present  
57 data separately by different subgroups.  
58  
59  
60

## Patient and Public Involvement

Patients and the public were not involved in designing this study. The study aim was to establish what is already published in peer reviewed literature on the topic, including the views of patients, their parents or caregivers, and the public.

## Results

### Study characteristics

The initial searches returned 4,861 potentially relevant abstracts. After screening and removal of duplicates, 145 publications were included in this review (Figure 1). There were six main types of studies: 60 before-and-after comparisons (shared accommodation followed by relocation to single-rooms); 75 comparisons of patients allocated to single rooms compared with others simultaneously in shared accommodation; 18 qualitative studies recording the views of patients, caregivers, or healthcare professionals on accommodation preferences; 10 evidence syntheses, including systematic literature reviews, guidelines and other reports; and three economic evaluations of accommodation type (Figure 2). Some studies incorporated more than one design.

All studies had methodological issues that potentially biased the results by not adjusting for confounding factors that are likely to have contributed to the outcomes. In the 60 before-and-after trials, many factors other than accommodation changed due to moving into new facilities, such as unfamiliarity with new layouts and logistics. In the 75 contemporaneous comparisons, reasons for bed space allocations were not generally reported (e.g., availability, severity of illness), making their effects on the differences in outcomes unclear. Approximately one-third of studies overall (35 of 104) did not report any baseline characteristics of the study participants, and the rest reported few details other than age and sex. This heterogeneity and uncertainty about the comparability of study populations meant that a formal meta-analysis of outcomes was considered infeasible. Overall, only 25 of the studies included reported p values for differences in baseline characteristics between patients admitted to multi- vs single-bed room. Of these 25, only five reported significant differences in any parameters ( $p \leq 0.05$ ): one study reports lower caregiver's age at the time of patient's admission,[9] three report lower gestational age of infants admitted to single rooms in NICU,[10–12] and one reports a higher proportion of female patients were admitted to single rooms.[13] The latter study however also notes that patients admitted to single rooms were frailer due to multiple comorbidities and functional dependence. This heterogeneity and uncertainty about the comparability of study populations meant that a formal meta-analysis of outcomes was considered infeasible.

The quality of studies varied widely. Thirty-four studies were assigned high quality scores (75–100%) with a range of 78–100% (see supplementary table 1). Twenty-three studies were classified as being of low quality (<50%) with a range of 10–48%.

### Mortality

Eighteen studies reported mortality (see Figure 3 and supplementary Table 2).[9,14–30] Ten were before-and-after studies and the others were contemporary studies. Only one article scored less than 50% for quality and two had high quality scores. Six studies involved neonates/infants, one assessed children, and the remainder were concerned with adult/elderly care. The numbers of deaths were low, meaning that the studies might have been underpowered to detect small or moderate effects, for example a small difference in mortality. Likewise, whether reported increases

1  
2  
3 in mortality reflected true increases in risk or were due to confounding factors (e.g., unreported  
4 reasons for patients being allocated single rooms) is unclear.  
5  
6  
7

### 8 Routine care

9 Four studies involved patients receiving routine care,[14,15,22,28], all in adults, none of which found  
10 a significant difference in mortality between those in single rooms versus shared accommodation,  
11 including up to 1 year after discharge.  
12  
13

### 14 Intensive care

15 Six studies assessed mortality among adults in ICUs.[9,19,23,24,26,30] One study by Bracco and  
16 colleagues[23] favoured single rooms. That study included 2,522 adults in ICUs in Canada and  
17 reported mortality of 2.9% among those in single rooms or cubicles compared with 8.3% among  
18 those in shared accommodation ( $p < 0.001$ ). A study of 666 adults in ICUs in Korea with COVID-19  
19 favoured shared accommodation, reporting 2.4% mortality versus 4.6% among those treated in  
20 single rooms but no statistical analysis of the difference was reported.[26] The other studies showed  
21 no differences between accommodation types.  
22  
23

24 Seven studies assessed mortality specifically among neonates in ICU.[16–18,21,25,27,29] Three  
25 favoured single rooms. Lehtonen et al.[29] assessed 4,662 neonates in 331 neonatal ICUs (NICUs)  
26 across 10 countries (Canada, Australia, New Zealand, Finland, Israel, Japan, Spain, Sweden,  
27 Switzerland, Italy) and found that those cared for in units with single rooms had lower odds of death  
28 or any major morbidity than those in units with no such facilities (adjusted odds ratio 0.76; 95% CI  
29 0.64–0.89). Two papers reported reduced mortality in single rooms among a small population of  
30 neonates in intensive care, but statistical significance was not reported.[16,17] By contrast, two  
31 studies favoured shared accommodation. Puumala and colleagues[21] reported a lower percentage  
32 of deaths among 9,995 neonates. Harris et al.[25,31] assessed NICUs in 11 hospitals in the USA and  
33 found fewer deaths among neonates nursed in units with shared accommodation compared with  
34 units with single rooms. However, statistical significance was not reported in either.  
35  
36

37 Lazar et al[20] was the only study to assess children in a paediatric ICU and found no difference  
38 between accommodations types.  
39  
40  
41  
42  
43  
44

### 45 Patient care and disease management

46 Twelve publications reported on outcomes related to patient care and disease management (see  
47 Figure 3 and supplementary Table 3).[3,15,32–41] All were in adults or non-specified age groups.  
48 Three were before-and-after studies, four were contemporaneous studies, and five were evidence  
49 syntheses. Four studies had quality scores below 50% but four had scores greater than 75%. All  
50 papers assessed routine care.  
51  
52

53 Most findings favoured single rooms. Significance was shown for improvements in cleanliness,[36]  
54 pain management[36], and interactions between patients and medical staff,[37] and other findings  
55 were descriptive. A study in Australia of 1,569 orthopaedic patients had fewer emergency calls due  
56 to deterioration in condition after a move to single rooms compared with patients in shared  
57 accommodation.[15] As room allocation was based partly on severity of illness, nurses tended to  
58 position themselves nearer higher-risk patients to aid visualisation. Lawson and Phiri[33] found  
59 better patient satisfaction with care and lower analgesic use in orthopaedic patients in single rooms.  
60

1  
2  
3 Three systematic reviews found that patients in single rooms may have faster recovery due to better  
4 sleep and a more pleasant environment,[39] but there was no consistent effect on use of  
5 medication.[40] An OECD WHO report concluded that single-room occupancy was associated with  
6 reduced pain scores, but due to a lack of detail had a very low quality score (14%).[42]  
7

8 Findings in favour of shared accommodation were feelings of safety[34] and less use of restraints.[3]  
9 In a comparison of only single rooms after a move to a new hospital with only shared  
10 accommodation in the previous hospital, falls and medication errors in the medical assessment unit  
11 increased notably immediately but by 9 months had fallen to levels lower than previously.[32]  
12 However, in the single-room ward for older adults, falls and pressure ulcers significantly increased  
13 after the move and remained higher than before moving. No similar trends were seen after the  
14 move in a control hospital with 50% single rooms and 50% shared accommodation, and this was the  
15 preferred choice of nurses before and after the move (38% and 40%, respectively).  
16  
17  
18  
19  
20

## 21 **Maternity and neonatal care**

22 Twenty-three studies were found that assessed maternity and neonatal care (see Figure 3 and  
23 supplementary Table 4). Most (n=14) were before-and after studies and the remainder were  
24 contemporaneous studies.[10,12,17,18,21,43–60] Three studies were low quality and only one had a  
25 high-quality score. Many of these studies included statistically assessed findings, with most  
26 favouring single rooms or showing no difference between accommodation types.  
27  
28  
29  
30

### 31 **Maternity care**

32 Nine studies considered maternity care and perceptions of mothers and family  
33 members.[44,45,47,49,50,52–55]  
34

35 Harris and colleagues[46] assessed 976 low-risk patients, 583 of whom received all care in single  
36 rooms and 393 in separate labour, delivery, and recovery areas. While overall use of intrapartum  
37 interventions was similar, maternal outcomes were better in single rooms. After discharge, Erdeve et  
38 al[53] reported that mothers of babies in NICUs who received care in shared accommodation had  
39 significantly more acute care visits ( $p=0.046$ ), telephone consultations ( $p=0.01$ ), and  
40 rehospitalizations ( $p<0.05$ ) than those cared for in single rooms, and the reasons were more likely to  
41 be for issues related to prematurity like feeding difficulties compared with anatomical disorders. This  
42 perception is supported by the findings of Janssen et al,[47] which showed that mother in single  
43 rooms rated information and instructions at discharge as being clearer than those in shared  
44 accommodation.  
45  
46  
47

48 Multiple studies indicated that satisfaction with care teams was greater in single rooms, including  
49 duration and quality of interactions and needs met.[44,45,47–50,52] In one study participants felt  
50 that parental presence was greater in single rooms than in shared accommodation.[54] In a US  
51 study, women reported less pain in single rooms than in shared accommodation.[48]  
52  
53  
54

### 55 **Neonatal care**

56 Fourteen papers reported on outcomes in neonatal care.[10,12,17,21,43,46–48,51,56–60] Many of  
57 the results for neonates in ICUs showed no differences in outcomes between accommodation types.  
58 Significant improvements were seen in breastfeeding outcomes[17,21,58,61] and weight gain[51,61]  
59 in favour of single rooms. However, Tandberg et al[12] reported that longer-term weight gain (4  
60

1  
2  
3 months) was better after neonatal care in shared accommodation. In two studies, reduced apnoea  
4 events were associated with single rooms,[17,62] and in another study less need for mechanical  
5 ventilation was reported in single rooms.[58] Significantly reduced neonatal pain scores were also  
6 reported.[48]  
7  
8  
9

## 10 **Complications of disease**

11 Twenty-three articles assessed disease complications (see Figure 3 and supplementary Table  
12 5).[3,14,15,22–24,28–30,32,46,48,53,57,59,63–68] Nine were before-and-after studies, 10 were  
13 contemporaneous studies, one used a mix of study designs, and three were evidence syntheses. Two  
14 articles had quality scores below 50% and two had scores greater than 75%. Findings generally  
15 favoured single rooms or showed no differences between accommodation types.  
16  
17  
18  
19

## 20 **Routine care**

21 Eight papers assessed complications specifically in routine care and all assessed care of  
22 adults.[14,17,22,28,46,67–69] Only one study reported results with significance assessed, which  
23 showed reduced incidence of delirium among older adults with dementia nursed in single rooms  
24 (hazard ratio 0.66, 95% CI 0.48–0.93,  $p < 0.02$ ).[69] The Scottish guidelines on delirium recommend  
25 reducing light and noise and having familiar items around patients with or at risk of developing  
26 delirium,[68] which might be supported by this finding.  
27  
28  
29

30 In a small relocation study ( $n=64$ )[32] pressure injuries seemed to be increased around tenfold in  
31 single rooms and falls in 50% or 100% shared accommodation, but a substantial change in case mix  
32 made this finding difficult to interpret. By contrast, in a larger non-controlled UK relocation study  
33 ( $n=1,569$ ), no significant difference was noted between different types of accommodation.  
34

35 The findings for other complications, such as hip fracture rates following falls, thromboembolic  
36 events, infections, and other medical complications were not significantly different among  
37 orthopaedic patients in single rooms compared with those in shared accommodation in an  
38 Australian study.[67] Patients in single rooms were more likely to be female and much more likely to  
39 have private health insurance, which may have biased the outcomes.  
40  
41  
42  
43

## 44 **Intensive care**

45 Twelve papers specified assessments in ICU settings, of which three assessed adults[23,24,30] and  
46 nine concerned neonatal care.[29,48,53,57,59,64,64–66] In one study of 1,253 adults in Brazil,[24]  
47 delirium was significantly less likely among those in ICU single rooms than in shared accommodation,  
48 but no significant difference was seen between groups of elderly patients in different types of ICU  
49 accommodation in the Netherlands.[30] Organ failure was reported to be significantly lower in  
50 patients managed in single rooms in one study.[23] However, few data are available in adults and  
51 most studies reported no differences between accommodation types.  
52  
53  
54  
55

56 An international study of 4,662 preterm neonates found a significantly lower risk of death or any  
57 major morbidity, including sepsis and retinopathy of prematurity, among those nursed in NICUs with  
58 single family rooms (odds ratio 0.76, 95% CI 0.64–0.89).[29] In contrast, another study showed lower  
59 rates of necrotising enterocolitis and intraventricular haemorrhage in shared accommodation.[51]  
60

1  
2  
3 However, in other studies, rates of these and other serious complications were similar in all ward  
4 types.[51,59,62,64] Lester et al[64] found that neonatal stress levels were reduced among babies in  
5 NICU single maternity care rooms compared with those in shared accommodation.  
6  
7

### 8 9 **Prevention of infection**

10 Fifty-one studies discussed prevention of infection (see Figure 3 and supplementary Table  
11 6).[3,12,15,17–21,23–25,27,32,40,41,51,56,59,65,70–102] Twenty were before-and-after studies, 28  
12 were contemporaneous studies, one used a mix of study designs, and three were evidence  
13 syntheses. Seven had low quality scores and nine had high quality scores. More than half (n=33)  
14 studies reported statistically analysed data.  
15  
16

### 17 18 **Routine care**

19 Routine care was assessed in adults in 10 studies[15,73,79,81,83,84,88,91,93,97] and eight involved  
20 mixed age populations and care levels that stated or were assumed to include adults and routine  
21 care.[32,40,41,71,75,76,92,99] Hospital-acquired infection rates were shown to be reduced in single  
22 rooms in six studies.[32,41,71,73,75,91,92] However, in Maben et al,[32] this finding depended on  
23 the ward mix: *Clostridium difficile* infections were reduced in single rooms where the split with  
24 shared accommodation was half and half, whereas all shared accommodation performed better  
25 than all single rooms. In Darley et al[71] this finding was only for *C difficile*, whereas hospital-  
26 acquired MRSA rates did not differ by accommodation type. Bocquet et al[82] and Munier-Marion et  
27 al[91] found reduced nosocomial influenza infections in single rooms and one study showed a  
28 reduced risk of norovirus infection.[86] By contrast, McDonald and colleagues[75] noted reduced  
29 infection rates for *Enterococcus* spp, *C difficile*, and MRSA. In a systematic review, Voigt et al[40]  
30 concluded that the quality of evidence did not support the use of single rooms over shared  
31 accommodation. Indeed, only two studies showed increased infections in shared  
32 accommodation.[32,87] Nevertheless, in one study patients[81] preferred single rooms for infection  
33 prevention. In a study of more than 1 million patients of all ages across 2018 hospitals in the USA,  
34 O'Neill and colleagues[99] found that single rooms were significantly associated with reductions in  
35 central-line-associated bloodstream infections.  
36  
37

38 Seven studies assessed routine care in children.[82,85,90,94,100,101] Two found a decrease in  
39 nosocomial infections in single rooms – one overall[82] and one for diarrhoea in gastrointestinal and  
40 neurosurgical units,[85] but the latter found no difference between accommodation types in a  
41 cardiological unit. In two large studies in Finland (n=1,927 and n=5,119), Kinnula and  
42 colleagues[100,101] saw increases in hospital-acquired infections among children admitted to  
43 shared accommodation in an infectious disease ward because there was no grouping by aetiology.  
44 All hospital-acquired infections with symptoms during the hospital stay and 49% of those  
45 manifesting after discharge led to diarrhoea. The risk of infection was doubled among children  
46 sharing accommodation with patients who had respiratory infections (OR 2.3, 95% CI: 1.1–4.8;  
47 p=0.03). Risk decreased per year of age. Among 83,334 children assessed in two hospitals, Quach et  
48 al[94] found significantly increased rates of respiratory infections when accommodation was more  
49 than 50% single rooms (rate per 1,000 patient-days 1.33, 95% CI 1.29–1.37).  
50  
51  
52  
53  
54  
55  
56  
57  
58  
59  
60

### Intensive care

Outcomes in ICUs were reported specifically in 26 studies, 11 in adults and mixed-age populations,[19,23,24,70,72,74,77,89,95,96,102] one in children,[20] and 14 in neonates.[12,17,18,21,25,27,51,56,59,65,76,78,80,98]

Among adult populations, only one study showed outcomes in favour of shared accommodation, with reductions per 10,000 patient-days in cultures positive for *Enterobacter* spp, *Haemophilus*, *Streptococcus viridans*, *Acinetobacter* spp, *Streptococcus pneumoniae*, Group B *Streptococcus* spp, *Neisseria* spp, and MRSA.[77] However, in the same study, single rooms showed lower rates of infections with many common organisms, such as *Staphylococcus* spp, *C difficile*, and *Pseudomonas* spp. Four studies showed significant data on reduced bacterial infection and transmission in single rooms based on isolates and antibiotic use,[23,70,74,95] although in the study by Halaby et al,[74] transmission of *Morganella* spp, *Proteus* spp, *Serratia* spp, and *Pseudomonas* spp did not differ between accommodation types. Two studies indicated reduced risks of bloodstream infections in single rooms.[23,96] As for routine care, patients perceived infection prevention to be better in single rooms than in share spaces.[72]

Among neonates and among children in ICUs, the findings were mixed. In favour of shared accommodation, four studies reported reduced cases of nosocomial sepsis,[17,21] one reduced colonisation with multidrug-resistant organisms,[51] and one nosocomial infections with pneumonia.[25] Four studies indicated no difference between accommodation types for sepsis or septicaemia and/or found that the use of single rooms was associated with fewer sepsis cases.[12,21,59,78] Only one study showed an increase in sepsis in shared accommodation, and that was specifically in neonates born at or after term.[21]

### Patient safety

11 studies considered patient safety (see Figure 3 and supplementary Table 7).[3,15,22,28,32,40,41,69,88,103,104]. Three were before-and-after studies, four were contemporaneous studies, one used mixed design, and three were evidence syntheses. Two had low quality scores and three had high quality scores. Most of the studies assessed routine care or mixed care populations, and generally the populations were adults and elderly people.

Overall, the data showed no differences between accommodation types or favoured shared accommodation. Only the OECD study indicated reduced risk of falls in single rooms,[41] but the quality of this study was deemed to be very low due to reporting very few details of the research. Significantly lower rates of falls were seen in multi-bed accommodation in two studies.[22,28] The study of Poncette et al,[104] which analysed alarm data in an ICU, found that the number of alarms per bed per day was higher in single rooms than in shared accommodation.

### Readmissions and reinterventions

Only two studies reported on readmissions and reinterventions (see Figure 3 and supplementary Table 8). They were both contemporaneous studies and one had a quality score of 74% and one of 78%. One showed that single rooms were associated with lower rates of rehospitalisation.[53] The other favoured shared accommodation, with fewer patients returning to theatre within 6 weeks of treatment.[67]



## Privacy

Forty-eight publications, including six evidence syntheses, reported on privacy (see supplementary table 9). [3,5,15,16,25,32,34,36–39,41,43–47,49,52,55,61,62,72,81,90,102,103,105–125] Eighteen were before-and-after studies, 23 were contemporaneous studies, one used mixed designs, and six were evidence syntheses. Nine had low quality scores but 19 had high quality scores. They were mainly descriptive studies but overwhelmingly favoured single rooms.

### Routine care

Twenty-eight studies assessed privacy among adults receiving routine care, [3,5,15,32,34,36,37,39,41,44,46,47,61,81,103,105,106,109,112,115–122] with seven of these reporting statistical analyses. [32,34,36,41,46,47,109,117] Key aspects of privacy in single rooms were improved confidentiality when discussing personal information, use of private bathrooms, and privacy during early post-partum care (e.g., assistance with feeding). However, in the study by Florey and colleagues, [109] 83% of patients in shared rooms also reported feeling that they had adequate privacy. Likewise, the systematic reviews by Taylor and colleagues [3] and Dowdeswell and colleagues [38] found advantages and disadvantages with regards to privacy in all studies they assessed. Patients reported feeling as though they could ask more questions or make more remarks in single rooms than in shared accommodation, and more scored physicians' responses as being empathetic. [37] Qualitative or descriptive studies also strongly supported greater privacy in single rooms. [5,15,81,103,105,106,112,115,118–121,124]

Four studies assessed routine care among children. [90,108,114,123] Boztepe et al [114] found that children did not rank privacy highly and were more concerned about procedures being painful. In this study many of the children had extensive history of hospitalisation. The other three studies reported greater privacy in single rooms, but children also seemed to enjoy the social aspect of shared accommodation. The main reasons for preferring single rooms were private bathrooms and the capacity for family members to stay. Sleep was an important aspect of care in single rooms for children and parents. [61,90,123]

### Intensive care

Nine studies reported on privacy for adults in ICUs, and generally the findings favoured single rooms. [3,38,41,45,49,52,62,72,113] Three studies reported statistical evidence of improved privacy in single rooms among adult patients. [41,45,49] The literature reviews by Dowdeswell and colleagues [38] and Taylor and colleagues [3] showed mixed findings among studies.

Eleven studies addressed neonatal care in ICUs. [16,25,43,45,49,52,55,102,107,110,111] All but two [43,55] favoured single rooms for privacy.

### Loneliness/isolation and family contact

Fifty-five publications, five were evidence syntheses, reported patients' views about loneliness or family contact associated with single-room accommodation (see Figure 4 and supplementary Table 10). [5,11,12,16,22,25,31,32,34,36,38,39,41,43,44,47,49,50,52–54,57,60–62,72,78,81,90,102,103,106,108–113,117,118,120–123,126–134]. Twenty were before-and-after studies, 29 were contemporaneous studies, one used mixed study designs, and five were evidence syntheses. Only nine had quality scores less than 50%, while high quality scores were assigned to 17.

Two main themes seemed to be revealed in patients' perspectives: shared accommodation were strongly preferred for social interaction to avoid loneliness/isolation,[5,16,22,32,34,39,43,52,61,72,81,90,106,108,109,117–123,126,127,129,132] whereas single rooms were preferred for privacy (e.g., for bathroom use, during consultations and visits, and to spend with children, particularly neonates).[5,11,12,16,34,38,43,50,52,54,57,60,62,72,78,81,90,102,108–110,112,113,117,130,134]

### Noise, disturbance, and sleep

Forty-five publications, four of which were evidence syntheses, reported patients' views about noise, disturbance, and sleep associated with single-room accommodation (see Figure 4 and supplementary Table 11).[15,16,30–32,34,36,38,39,41,43–47,52,57,61,62,72,80,81,90,107,109,111–113,115–117,120–122,133,135–143] Sixteen were before-and-after studies, 24 were contemporaneous studies, one used mixed study designs, and four were evidence syntheses. Nine had quality scores less than 50% and 13 had high quality scores.

In general, patients felt that single rooms were quieter and led to less sleep disruption. However, measurement of noise levels showed that there were no substantial objective differences between single rooms and shared accommodation.[36,57,137] One study reported lower noise levels in single rooms, but the difference was not statistically assessed.[80] Stevens et al[57] and Meyer et al[141] found that respiratory support and other medical devices could raise noise levels in single rooms enough to disturb sleep even when ambient noise had been reduced. HCPs also reported that single rooms improved patients' sleep.[16] Poncette and colleagues[104] found that fewer alarms raised in shared accommodation reduced overall noise levels. One study also noted that patients preferred single rooms because they felt they were less likely to disturb other patients.[122] Most studies addressing sleep found that it was improved in single rooms. [34,36,38,39,41,61,62,90,116,117,120,121,138,142] This was generally due to fewer disturbances and/or a perceived quieter environment than in shared accommodation. Hosseini and colleagues[117] and Sakr and colleagues[142] noted that the risk of new-onset insomnia was significantly higher among patients in shared accommodation (95.7% vs 75%,  $p=0.011$ ).

Humidity and temperature were discussed in one article. Van Enk and colleagues[137] reported that in a NICU with centrally controlled humidity, shared accommodation had non-significantly lower percentage of relative humidity than single rooms but showed much greater variance (26.8% ( $\pm 17.0$ ) in single rooms vs 26.0% ( $\pm 89.0$ )). Both mean values were lower than the recommended range for NICU (30–60%). Temperature could be controlled within individual single rooms and mean values were significantly lower than those in the shared accommodation, which had central temperature control per nursery (mean 73.8°F [range 65.3–77.5°F] in single rooms vs 76.0°F [range 71.1–84.5°F],  $p=0.0001$ ). More than 85% of readings in both, though, were within the recommended range of 72–78°F, although readings outside the range were too hot in shared accommodation and too cold in single rooms. The authors suggested that thermostats should be allowed to vary only within the recommended range.

Lighting was assessed in three studies, two of which favoured single rooms due to less illumination for neonates [45,57] and one study of patients with delirium that favoured lower light in a shared accommodation.[30]

### Satisfaction with care

1  
2  
3 Fifty-one publications, six of which were evidence syntheses, reported patients' satisfaction with  
4 care (see Figure 4 and supplementary Table 12).[5,9,12,15,25,31,33,34,36,38–41,43–  
5 45,47,49,54,60,61,64,66,78,81,90,103,105,107,109,111,112,114–117,119–122,124,128,131–  
6 133,135,138,144–148] Fifteen were before-and-after studies, 29 were contemporaneous studies,  
7 one used mixed study designs, one was an economic analysis and six were evidence syntheses. The  
8 quality scores of ten studies were less than 50% and of 14 were 75–100%.

9  
10  
11 Overall, results show either little difference between accommodation types or results in favour of  
12 single rooms. Single rooms seemed to be favoured most by mothers in maternity units, whereas  
13 preference towards shared accommodation seemed to increase with rising age. The economic  
14 analysis found that patients were willing to pay for private care to have single rooms.[148]  
15  
16

### 17 18 Routine care

19 Routine care was assessed in 30 studies (see supplementary table 12).[15,33,34,36,38–  
20 41,44,47,61,81,90,103,105,109,114–117,119–121,124,132,133,135,138,145,146] Patients preferred  
21 shared accommodation in seven studies.[39,90,119–121,132,135] Generally they preferred  
22 interaction with other patients, and in two reports they stated that they found the shared  
23 accommodation more secure and safe.[120,121] Specific reasons given for preferring single rooms  
24 were privacy,[36,61,81,103,115,133,135] comfort/environment,[33,47,105,112,145], level of care  
25 and information, effect on recovery,[38,41,47,105,116,117,138] and safety.[36,40]  
26  
27  
28  
29  
30

### 31 Intensive care

32 We found 24 reports of intensive care[9,11,25,31,38,41,43,45,49,54,60–  
33 62,64,66,78,107,111,112,128,131,133,145,147]. Only two reported findings that favoured shared  
34 accommodation. Campbell-Yeo et al[54] found that in an open-bay NICU, mothers reported better  
35 self-efficacy and less uncertainty about their babies' health. Also in a NICU, Pineda and  
36 colleagues[60] found that the risk of stress among mothers was significantly lower in shared  
37 accommodation than in single rooms, although life stress did not differ between accommodation  
38 types. By contrast, other assessments of stress found that risk was reduced in single  
39 rooms[11,25,31,64,78] or did not differ.[11,54,66] Satisfaction with design/environment, where  
40 assessed, favoured single rooms.[62,112]  
41  
42

43 Findings on satisfaction with maternity care was greater for parents in single rooms in three  
44 studies[9,62,64] but did not differ between accommodation types in two.[78,147] Single rooms  
45 seemed to have little effect on postpartum depression or irritability, most measures not differing  
46 between accommodation types[11,60,66,78,147] and only four findings favouring single  
47 rooms.[11,25,31,54]  
48  
49

50 Only eight of the 51 studies were related to satisfaction with care in other patient populations,  
51 involving cardiovascular, cancer, adolescent, or mixed adult care.[9,38,41,61,112,131,133,145] All  
52 these studies' findings supported single rooms.  
53  
54

### 55 Patient monitoring and safeguarding

56 Although the impact of single rooms on healthcare staff was not the focus of this review, 14 of the  
57 included publications reported the views of HCPs as well as patient-reported outcomes that we used  
58 to explore monitoring of patients (see Figure 4 and supplementary Table  
59  
60

1  
2  
3 13).[18,19,23,27,34,36,52,72,81,110,112,115,117,135] Four were before-and-after studies, eight  
4 were contemporaneous studies, one used mixed study designs, and one was an evidence synthesis.  
5 No study had a low-quality score. Five of the studies were classified as being of high quality.  
6

7 Most of the studies presented descriptive/qualitative findings. Three studies reported statistically  
8 assessed data, all in relation to routine care and among adult patients. Two[34,117] favoured single  
9 rooms, reporting that availability to patients, meeting patients' needs, and access to patients were  
10 improved. The fourth study showed no difference between single rooms and shared accommodation  
11 for responding to patients' call alerts. One study reported that nurses felt they might spend longer  
12 with patients in single rooms, depriving other patients of as much care.[110] In another, safety of  
13 patients in units with single rooms was raised as an issue due to increased distances between nurses  
14 and patients and impeded observation of patients.[72]  
15  
16  
17  
18  
19

### 20 **Patient confidentiality**

21 Confidentiality was assessed in 11 studies (see Figure 4 and supplementary Table  
22 14).[5,32,41,52,72,81,109,110,117,118] Five were before-and-after studies, four were  
23 contemporaneous studies, one used mixed study designs, and one was an evidence synthesis. Two  
24 studies had low quality scores while four had high quality scores.  
25

26 All studies concluded that patient confidentiality was better maintained when patients were in single  
27 rooms, with one study finding no difference for adults with cardiovascular disease in ICU[112] (see  
28 supplementary table 14). Malcom et al[118] found that the lack of privacy and confidentiality in  
29 shared accommodation affected patients' relationships with other patients.  
30  
31  
32  
33

### 34 **Availability of beds, space requirements, and capital costs**

35 Sixteen studies reported on beds, space, and costs associated with different accommodation types  
36 (see Figure 5 and supplementary Table 15).[9,17,19,27,32,33,43,60,71,94,100,101,110,112,129,149]  
37 Nine were before-and-after studies, six were contemporaneous studies, and one used mixed study  
38 designs. Two studies had quality scores below 50% and three were classified as being of high quality.  
39

40 There did not seem to be strong evidence in favour of either accommodation type. The inclusion of  
41 single rooms substantially increases the amount of floor space required to achieve the same number  
42 of beds as in shared accommodation, with estimates suggesting between 30% and 50% more floor  
43 space being required per bed, which increases capital costs.[9,17,32,33,110,129,149] Shared  
44 accommodation provides greater flexibility to add beds in times of need.[19,27,60,94,101] Darley  
45 and colleagues[71] found that numbers of bed-days lost due to ward closures caused by norovirus  
46 outbreaks was greatly reduced after moving to a hospital with 75% single rooms from the previous  
47 10% single rooms.  
48  
49  
50  
51  
52

### 53 **Length of stay**

54 Fifty-three publications, including two evidence syntheses, reported on length of stay associated  
55 with single-room accommodation (see Figure 5 and supplementary Table 16).[9,10,12,14–19,21–  
56 26,28–33,40,41,45,46,48,51–53,56,58,59,64–67,69,73,77–  
57 79,89,95,100,100,111,115,116,128,136,145,149–151] Twenty-eight were before-and-after studies,  
58 23 were contemporaneous studies, one used mixed study designs, and two were evidence  
59  
60

syntheses. Five of the studies were classified as being of low quality but only seven fell into the high-quality category. The evidence was highly mixed with no clear benefit from either accommodation type.

### Routine care

Of 20 studies assessing routine care, 18 concerned adults and the elderly.[14,15,28,32,33,40,41,46,67,69,73,81,115,116,136,145,149,151] Among these, eight found that length of stay was shorter in single rooms,[14,22,32,33,46,69,115,149,151] but in the study by Maben et al[32] this was true only for an older people's ward and not for a medical assessment unit, and in that by Lawson and Phiri,[33] while it was true for non-surgical orthopaedic patients and psychiatric patients, no difference was seen for surgical orthopaedic patients. One study found that length of stay was shorter in shared accommodation among older patients with dementia, overall and among those who had experienced inpatient falls.[28] No difference in overall length of stay was reported in seven studies, including two evidence syntheses.[15,40,41,67,73,136,145]

The two studies of routine care in children by Kinnula and colleagues showed no difference between accommodation types in one[100] but longer duration of admissions among children in shared accommodation in another.[101]

### Intensive care

Of 32 studies assessing length of stay in intensive care, 23 considered neonates[10,11,16–18,21,25,29,45,48,51–53,56,58,59,64–66,78,95,111,128,150] and nine adults.[9,19,23,24,26,30,77,79,89] As for routine care, the results were highly mixed.

Among the nine studies assessing care of adults in ICUs, five showed no significant differences between single rooms and shared accommodation.[9,19,30,30,79] Teltsch et al[77] assessed care after a change from multi-bed to single rooms and compared the findings to a hospital with no change. The length of stay in the ICU in the comparator hospital increased year on year from 3.8 days to 4.2 days from 2000 to 2005. While higher after the change to single rooms, the length of stay did not change substantially over the same period, and after adjustment was an estimated 10% lower overall (relative ratio 0.90, 95% CI 0–19%). Bracco and colleagues[23] reported that patients were able to stay longer in the same bed in single rooms during infection outbreaks in an ICU, although overall LOS was not significantly different.

In NICUs, statistically significant shorter durations of stay in hospital were reported in three studies. Puumala and colleagues[21] found that stays were shorter for very and extremely preterm babies, but there was no difference between accommodation types for moderately preterm babies, and stays for term and post-term babies were shorter in shared accommodation. Lehtonen et al[29] found that stays were on average 3.4 days shorter (95% CI 3.1–4.7) and van Veenendaal et al[78] found a median difference of 2 days in favour of single rooms. Qualitative/descriptive studies also favoured single rooms in five studies.[16,45,52,111] Three studies identified shorter stays in shared accommodation,[25,59,150] but 13 found no difference between accommodation types[10,11,17,18,48,51,53,56,58,64–66,128].

### Costs of care

1  
2  
3 Nineteen publications, including two evidence syntheses, reported on costs or resource use  
4 associated with different types of accommodation (see Figure 5 and supplementary Table  
5 17).[15,22,25,28,31,32,40,46,57,67,95,111,113,134,135,148,150,152] Eight were before-and-after  
6 studies, seven were contemporaneous studies, two used mixed study designs, and two were  
7 evidence syntheses. Four studies had low quality scores and six had high quality scores.  
8  
9

10 Several studies reported multiple measures of costs and found evidence supporting both types of  
11 accommodation. Therefore, the evidence split was 10 studies finding in favour of single rooms, 10 in  
12 favour of shared accommodation and six showing no difference in measures.  
13

14 Boardman and Forbes recommended taking into account the following construction and running  
15 costs, given that single-room facilities required more space to construct: land costs, construction  
16 costs, maintenance (refinishing and updating), housekeeping and operating costs, and health care  
17 provision (potentially longer distances to cover). Maben et al[32,135] estimated in 2015 that the  
18 cost of building a hospital solely comprising single rooms could be around 5% more than building  
19 one with predominantly shared accommodation but suggested that the difference becomes  
20 marginal over time. Harris and colleagues[31] found that the most cost-effective configuration in  
21 terms of construction costs per square foot was a combination of open bays and single rooms.  
22  
23

24 Findings in favour of single rooms were due to reduced overall staffing costs,[46,152] reduced length  
25 of stay,[95,111] reduced waiting and transfer times,[148] higher proportions of patients being  
26 discharged to rehabilitation,[67] reduced infections,[95] and operational efficiencies.[40,150]  
27 Reasons favouring shared accommodation were lower cleaning and housekeeping costs,[32,135]  
28 perceived increased nursing staff,[32,150] and lower labour costs in NICUs.[150]  
29  
30  
31  
32

### 33 **Discussion**

34 This systematic review identified a substantial body of evidence associated with hospital  
35 accommodation, yet no clearly consistent conclusions could be drawn about overall benefits of  
36 single rooms versus multi-bed ward spaces. The narrative and heterogeneous nature of much of the  
37 evidence also meant that a formal statistical synthesis, such as a meta-analysis, was not feasible.  
38 Nevertheless, some themes did emerge and might be worth considering further. Single rooms were  
39 most likely to be associated with overall clinical benefit for the most severely ill patients, especially  
40 neonates in intensive care, although the evidence is mixed even in these high-risk populations.  
41 Patients who preferred single rooms tended to do so for privacy, particularly having a private  
42 bathroom, and for reduced disturbances. By contrast, there were distinct patterns of men, older  
43 adults, children, and adolescents being more likely to prefer shared accommodation, particularly for  
44 the social aspects. While mixed accommodation types seemed to be the most cost-effective  
45 approach to construction because the capital cost of single room building is higher than that for  
46 shared accommodation, the running costs seem likely to be recouped over time by other  
47 efficiencies.  
48  
49  
50

51 While patients and HCPs expressed preferences, health-care outcomes seem unlikely to be  
52 substantially affected by hospital accommodation. This is reassuring because most patients also  
53 have little influence over this aspect of their care. Likewise, HCPs might also have little influence  
54 over which accommodation type their patients are assigned. Patient or family preferences for single  
55 rooms are particularly strong in NICUs and maternity wards, but other groups, in particular men,  
56 older adults and adolescents, are more likely to prefer shared accommodation. The split of  
57  
58  
59  
60

1  
2  
3 accommodation and whether the predictable adverse effects of accommodation design can be  
4 mitigated in these areas would be worth considering at the planning stages of new buildings.  
5

6 The average cost per patient of units comprising only single rooms was lower than those consisting  
7 of only shared accommodation. Mean direct cost per patient in a single room has been estimated to  
8 be 15.5% lower for neonates in ICU and 24% lower for care in maternity units but may be similar or  
9 reduced in adults in routine care wards. Shorter length of stay was an important contributor to this  
10 difference and could increase the number of patients who can be treated in the beds available.  
11 However, the effects found were small and local variations may change the economic picture for a  
12 particular hospital. It is also unclear how far the reduced length of stay was due to the single room,  
13 and how much was caused by confounding factors associated with being in a new hospital. Nearly all  
14 the studies we considered were from high-income regions and mostly based in European or  
15 anglophone countries. Thus, policy makers should incorporate local building and labour costs in  
16 decisions.  
17  
18  
19

20 Determining the impact of moving to single-room wards will therefore always need to overcome the  
21 impact of confounding factors such as concomitant changes to processes and improvements in other  
22 facilities and services that may also have led to the changes, or that may have acted in opposition to  
23 the direct effects of the different accommodation.  
24

25  
26 A number of other systematic reviews have been conducted on this topic. Ten scoping or systematic  
27 literature reviews were identified by our search, of which only one was able to conduct a meta-  
28 analysis of outcome data in premature infants.[78] As no quantitative synthesis was undertaken in  
29 most cases, the analyses were not adjusted for potential confounding factors such as the interaction  
30 between outcomes from patients sharing a room or potential bias from sicker patients being more  
31 or less likely to be nursed in single rooms. In neonatal ICUs, three systematic reviews with only a  
32 narrative synthesis found that single rooms were usually found to improve privacy and parental  
33 involvement, improved sleep and reduced hospital-acquired infections, but that these outcomes  
34 were usually based on a small number of non-randomised studies.[153–155] The meta-analysis  
35 found sepsis rates were significantly lower and exclusive breastfeeding at discharge was significantly  
36 higher in single family rooms There were no significant differences in cognitive development, length  
37 of admission, growth, complications of ICU admission and mortality. Four other systematic  
38 reviews[3,40,156,157] and two scoping reviews[39,158] assessed outcomes in a more general  
39 hospital population and generally found mixed evidence of benefits from single rooms, with each  
40 review identifying between 12 and 44 studies that reported advantages, disadvantages and neutral  
41 findings for most clinical outcomes, but a more positive result for patient privacy and satisfaction.  
42  
43  
44

45 This study has some limitations. Of 215 articles originally retrieved, we selected 145 for review,  
46 which is still a large number. None of the 145 studies used randomised study designs. Randomised  
47 controlled studies are not practical to assess hospital accommodation and, therefore, most studies  
48 were prone to bias. In particular, in hospitals with mixed single rooms and shared accommodation,  
49 patients must be allocated to the rooms, which will be partly due to their medical condition or other  
50 personal factors and partly due to bed availability at the time of admission. This introduces selection  
51 bias, as the reasons why patients were in single rooms was often not reported. We minimised this  
52 bias by excluding studies where the allocation to single rooms or shared accommodation was known  
53 to be for an apparent clinical purpose. Additionally, 60 of the publications compared outcomes  
54 before and after moving from shared accommodation to single rooms. This introduced confounding,  
55 as many factors other than the studied intervention would have changed at the same time, so  
56 attributing the outcome to the intervention alone is misleading. The opportunity of building a new  
57 hospital is rare. While it provides an ideal platform for before-and-after studies, nearly all of these  
58  
59  
60

1  
2  
3 studies were of a single hospital, so the total number of hospitals studied is low, meaning that  
4 uncertainty about risks and benefits remains after this systematic review.  
5

6 In practical terms, although there are still uncertainties about the true impact of changing to single  
7 room wards, the 145 publications synthesised in this report show that the clinical and economic  
8 consequences of such a change are likely to be modest. Focussed research on the impact of  
9 accommodation type on hospital acquired airborne transmitted infections may be warranted, as  
10 may studies of sufficient duration to examine long term productivity changes after opening a new  
11 hospital. Because the global effect sizes found were modest, the effects within national systems or  
12 for specialist hospitals might be different in size and direction from the global. In particular, none of  
13 the included studies were in low-income or middle-income countries, so generalisability to those  
14 settings is difficult. Additional research might explore how the trend for sicker patients to be nursed  
15 in beds closer to the nursing station interacts with the choice of single or shared accommodation.  
16 How much outcomes of patients in shared rooms might be dependent on each other also warrants  
17 investigation. This would help clarify the main uncertainties within this review and would therefore  
18 allow some adjustment to be made to the assessment of the impact of single rooms on clinically  
19 important outcomes.  
20  
21  
22  
23  
24  
25

### 26 ***Contributorship***

27 AB, AM, NC, CS, RA, WS, AO, and DMcP wrote sections of the final manuscript. DMcP conceived the  
28 study and defined the research question. AM defined the detailed method and arbitrated  
29 disagreements. AB and NC conducted the literature screening and data extraction. CS developed the  
30 figures and summary tables. The corresponding author attests that all listed authors meet  
31 authorship criteria and that no others meeting the criteria have been omitted.  
32

### 33 ***Ethical Approval Statement***

34 This study did not require ethics approval as it was a study of preexisting published literature, not  
35 human participants or animals.  
36

### 37 ***Competing interests***

38 No, there are no competing interests for any author  
39

### 40 ***Data sharing statement***

41 All data relevant to the study are included in the article or uploaded as supplementary information.  
42  
43

### 44 ***Funding***

45 The study was funded by The New Hospital Programme, Department of Health and Social Care,  
46 which commissioned the overall research area but had no input into the study design, the collection,  
47 analysis, and interpretation of data, the writing of the report, or decision to submit the article for  
48 publication. All authors, external and internal, had full access to all of the data (including statistical  
49 reports and tables) in the study and can take responsibility for the integrity of the data and the  
50 accuracy of the data analysis.  
51  
52  
53  
54

### 55 ***Registration***

56 PROSPERO registration number CRD42022311689, registered on 2<sup>nd</sup> March 2022, after preliminary  
57 searches were undertaken and before formal screening began.  
58  
59  
60



## References

- 1 Ewbank L, Thompson J, McKenna H, *et al*. NHS hospital bed numbers: past, present, future. The King's Fund. 2021.<https://www.kingsfund.org.uk/publications/nhs-hospital-bed-numbers> (accessed 30 Jan 2023).
- 2 UK Government. PM confirms £3.7 billion for 40 hospitals in biggest hospital building programme in a generation. GOV.UK. 2020.<https://www.gov.uk/government/news/pm-confirms-37-billion-for-40-hospitals-in-biggest-hospital-building-programme-in-a-generation> (accessed 11 Jul 2022).
- 3 Taylor E, Card AJ, Piatkowski M. Single-Occupancy Patient Rooms: A Systematic Review of the Literature Since 2006. *HERD* 2018;**11**:85–100. doi:10.1177/1937586718755110
- 4 Pennington H, Isles C. Should hospitals provide all patients with single rooms? *BMJ* 2013;**347**:f5695–f5695. doi:10.1136/bmj.f5695
- 5 Roos AKØ, Skaug EA, Grøndahl VA, *et al*. Trading company for privacy: A study of patients' experiences. *Nurs Ethics* 2020;**27**:1089–102. doi:10.1177/0969733019874497
- 6 Webster CS, Jowsey T, Lu LM, *et al*. Capturing the experience of the hospital-stay journey from admission to discharge using diaries completed by patients in their own words: a qualitative study. *BMJ Open* 2019;**9**:e027258. doi:10.1136/bmjopen-2018-027258
- 7 Downs SH, Black N. The feasibility of creating a checklist for the assessment of the methodological quality both of randomised and non-randomised studies of health care interventions. *J Epidemiol Community Health* 1998;**52**:377–84. doi:10.1136/jech.52.6.377
- 8 Campbell M, McKenzie JE, Sowden A, *et al*. Synthesis without meta-analysis (SWiM) in systematic reviews: reporting guideline. *BMJ* 2020;**368**:l6890. doi:10.1136/bmj.l6890
- 9 Jongerden IP, Slooter AJ, Peelen LM, *et al*. Effect of intensive care environment on family and patient satisfaction: a before–after study. *Intensive Care Med* 2013;**39**:1626–34. doi:10.1007/s00134-013-2966-0
- 10 Erickson C, Kattelman K, Ren C, *et al*. Traditional open-bay versus single-family room neonatal intensive care unit: a comparison of selected nutrition outcomes. *Res Rep Neonatal* 2011;**1**:15–20. doi:10.2147/RRN.S15539
- 11 Tandberg BS, Frøslie KF, Flacking R, *et al*. Parent-Infant Closeness, Parents' Participation, and Nursing Support in Single-Family Room and Open Bay NICUs. *J Perinat Neonatal Nurs* 2018;**32**:E22–32. doi:10.1097/JPN.0000000000000359
- 12 Tandberg BS, Flacking R, Markestad T, *et al*. Parent psychological wellbeing in a single-family room versus an open bay neonatal intensive care unit. *PLoS ONE* 2019;**14**:e0224488. doi:10.1371/journal.pone.0224488
- 13 Singh I, Krishnan M, Edwards C, *et al*. Loneliness among Older People in Hospitals: A Comparative Study between Single Rooms and Multi-Bedded Wards to Evaluate Current Health Service within the Same Organisation. *Gerontol Geriatr Res* 2016;**2**:1015.
- 14 Cantoni N, Weisser M, Buser A, *et al*. Infection prevention strategies in a stem cell transplant unit: impact of change of care in isolation practice and routine use of high dose intravenous

- 1  
2  
3 immunoglobulins on infectious complications and transplant related mortality. *Eur J Haematol* 2009;**83**:130–8. doi:10.1111/j.1600-0609.2009.01249.x
- 4  
5  
6  
7 15 Davis M, Elliott R, Hills R, *et al.* Single-Room Ward Design and Its Impact on Service and Patient  
8 Outcomes: An Evaluation Study. *Orthop Nurs* 2019;**38**:317–25.  
9 doi:10.1097/NOR.0000000000000593
- 10  
11 16 Domanico R, Davis DK, Coleman F, *et al.* Documenting the NICU design dilemma: parent and  
12 staff perceptions of open ward versus single family room units. *J Perinatol* 2010;**30**:343–51.  
13 doi:10.1038/jp.2009.195
- 14  
15 17 Domanico R, Davis DK, Coleman F, *et al.* Documenting the NICU design dilemma: comparative  
16 patient progress in open-ward and single family room units. *J Perinatol* 2011;**31**:281–8.  
17 doi:10.1038/jp.2010.120
- 18  
19 18 Jansen SJ, Lopriore E, Berkhout RJM, *et al.* The Effect of Single-Room Care Versus Open-Bay  
20 Care on the Incidence of Bacterial Nosocomial Infections in Pre-Term Neonates: A  
21 Retrospective Cohort Study. *Infect Dis Ther* 2021;**10**:373–86. doi:10.1007/s40121-020-00380-9
- 22  
23 19 Jung J, Choe PG, Choi S, *et al.* Reduction in the acquisition rate of carbapenem-resistant  
24 Acinetobacter baumannii (CRAB) after room privatization in an intensive care unit. *J Hosp*  
25 *Infect* 2022;**121**:14–21. doi:10.1016/j.jhin.2021.12.012
- 26  
27 20 Lazar I, Abukaf H, Sofer S, *et al.* Impact of Conversion from an Open Ward Design Paediatric  
28 Intensive Care Unit Environment to All Isolated Rooms Environment on Incidence of  
29 Bloodstream Infections and Antibiotic Resistance in Southern Israel (2000 to 2008). *Anaesth*  
30 *Intensive Care* 2015;**43**:34–41. doi:10.1177/0310057X1504300106
- 31  
32 21 Puumala SE, Rich RK, Roy L, *et al.* Single-family room neonatal intensive care unit design: do  
33 patient outcomes actually change? *J Perinatol* 2020;**40**:867–74. doi:10.1038/s41372-019-0584-  
34 6
- 35  
36 22 Singh I, Okeke J, Edwards C. Outcome of in-patient falls in hospitals with 100% single rooms  
37 and multi-bedded wards. *Age Ageing* 2015;**44**:1032–5. doi:10.1093/ageing/afv124
- 38  
39 23 Bracco D, Dubois M-J, Bouali R, *et al.* Single rooms may help to prevent nosocomial  
40 bloodstream infection and cross-transmission of methicillin-resistant Staphylococcus aureus in  
41 intensive care units. *Intensive Care Med* 2007;**33**:836–40. doi:10.1007/s00134-007-0559-5
- 42  
43 24 Caruso P, Guardian L, Tiengo T, *et al.* ICU Architectural Design Affects the Delirium Prevalence:  
44 A Comparison Between Single-Bed and Multibed Rooms\*. *Crit Care Med* 2014;**42**:2204–10.  
45 doi:10.1097/CCM.0000000000000502
- 46  
47 25 Harris DD, Shepley MM, White RD, *et al.* The impact of single family room design on patients  
48 and caregivers: executive summary. *J Perinatol* 2006;**26**:S38–48. doi:10.1038/sj.jp.7211583
- 49  
50 26 Hyun M, Lee JY, Kwon YS, *et al.* COVID-19: Comparing the applicability of shared room and  
51 single room occupancy. *Transbound Emerg Dis* 2021;**68**:2059–65. doi:10.1111/tbed.13853
- 52  
53 27 Julian S, Burnham C-AD, Sellenriek P, *et al.* Impact of Neonatal Intensive Care Bed  
54 Configuration on Rates of Late-Onset Bacterial Sepsis and Methicillin-Resistant Staphylococcus  
55 aureus Colonization. *Infect Control Hosp Epidemiol* 2015;**36**:1173–82.  
56 doi:10.1017/ice.2015.144
- 57  
58  
59  
60

- 1  
2  
3 28 Knight S, Singh I. Profile of inpatient falls in patients with dementia: A prospective comparative  
4 study between 100% single rooms and traditional multibedded wards. *J Clin Gerontol Geriatr*  
5 2016;**7**:87–92. doi:10.1016/j.jcgg.2016.03.002  
6  
7  
8 29 Lehtonen L, Lee SK, Kusuda S, *et al.* Family Rooms in Neonatal Intensive Care Units and  
9 Neonatal Outcomes: An International Survey and Linked Cohort Study. *J Pediatr* 2020;**226**:112-  
10 117.e4. doi:10.1016/j.jpeds.2020.06.009  
11  
12 30 Zaal IJ, Spruyt CF, Peelen LM, *et al.* Intensive care unit environment may affect the course of  
13 delirium. *Intensive Care Med* 2013;**39**:481–8. doi:10.1007/s00134-012-2726-6  
14  
15 31 Harris D, McCuskey M, White R. The impact of single family NICU rooms. 2006.  
16 [https://www.healthdesign.org/system/files/impact\\_of\\_single\\_family\\_nicu\\_rooms\\_1.pdf](https://www.healthdesign.org/system/files/impact_of_single_family_nicu_rooms_1.pdf)  
17 (accessed 12 Jul 2022).  
18  
19 32 Maben J, Griffiths P, Penfold C, *et al.* One size fits all? Mixed methods evaluation of the impact  
20 of 100% single-room accommodation on staff and patient experience, safety and costs. *BMJ*  
21 *Qual Saf* 2016;**25**:241–56. doi:10.1136/bmjqs-2015-004265  
22  
23 33 Lawson B, Phiri M. Hospital design. Room for improvement. *Health Serv J* 2000;**110**:24–6.  
24  
25 34 Ehrlander W, Ali F, Chretien KC. Multioccupancy hospital rooms: Veterans' experiences and  
26 preferences. *Journal of Hospital Medicine* 2009;**4**:E22–7. doi:10.1002/jhm.491  
27  
28 35 McKeown K, Haase T, Pratschke J, *et al.* Determinants of care outcomes for patients who die in  
29 hospital in Ireland: a retrospective study. *BMC Palliat Care* 2015;**14**:11. doi:10.1186/s12904-  
30 015-0014-2  
31  
32 36 Nahas S, Patel A, Duncan J, *et al.* Patient Experience in Single Rooms Compared with the Open  
33 Ward for Elective Orthopaedic Admissions. *Musculoskeletal Care* 2016;**14**:57–61.  
34 doi:10.1002/msc.1110  
35  
36 37 van de Glind I, van Dulmen S, Goossensen A. Physician–patient communication in single-  
38 bedded versus four-bedded hospital rooms. *Patient Educ Couns* 2008;**73**:215–9.  
39 doi:10.1016/j.pec.2008.07.004  
40  
41 38 Dowdeswell B, Erskine J, Heasman M. Hospital Ward Configuration Determinants Influencing  
42 Single Room Provision. A Report for NHS Estates, England by the EU Health Property Network.  
43 2004.  
44 [https://citeseerx.ist.psu.edu/document?repid=rep1&type=pdf&doi=91223495002f5a83411e5](https://citeseerx.ist.psu.edu/document?repid=rep1&type=pdf&doi=91223495002f5a83411e51fbe4e589be5ad80218)  
45 [1fbe4e589be5ad80218](https://citeseerx.ist.psu.edu/document?repid=rep1&type=pdf&doi=91223495002f5a83411e51fbe4e589be5ad80218)  
46  
47 39 Søndergaard SF, Beedholm K, Kolbæk R, *et al.* Patients' and Nurses' Experiences of All Single-  
48 Room Hospital Accommodation: A Scoping Review. *HERD* 2022;**15**:292–314.  
49 doi:10.1177/19375867211047548  
50  
51 40 Voigt J, Mosier M, Darouiche R. Private Rooms in Low Acuity Settings: A Systematic Review of  
52 the Literature. *HERD* 2018;**11**:57–74. doi:10.1177/1937586717702597  
53  
54 41 OECD, World Health Organization. *Improving Healthcare Quality in Europe: Characteristics,*  
55 *Effectiveness and Implementation of Different Strategies.* OECD 2019. doi:10.1787/b11a6e8f-  
56 en  
57  
58  
59  
60

- 1  
2  
3 42 Rechel B, Erskine J, Dowdeswell B, *et al.* *Capital investment for health: case studies from Europe*. Copenhagen, Denmark: : European Health Property Network : European Observatory on Health Systems and Policies 2009. file:///C:/Users/rasht/Downloads/9789289041782-eng.pdf  
4  
5  
6  
7  
8  
9 43 Stelwagen M, van Kempen A, Westmaas A, *et al.* Parents' Experiences With a Model of Integrated Maternity and Neonatal Care Designed to Empower Parents. *J Obstet Gynecol Neonatal Nurs* 2021;**50**:181–92. doi:10.1016/j.jogn.2020.11.001  
10  
11  
12  
13 44 Olson ME, Smith MJ. An evaluation of single-room maternity care. *Health Care Superv* 1992;**11**:43–9.  
14  
15  
16 45 Carter BS, Carter A, Bennett S. Families' views upon experiencing change in the neonatal intensive care unit environment: from the "baby barn" to the private room. *J Perinatol* 2008;**28**:827–9. doi:10.1038/jp.2008.102  
17  
18  
19  
20 46 Harris SJ, Farren MD, Janssen PA, *et al.* Single Room Maternity Care: Perinatal Outcomes, Economic Costs, and Physician Preferences. *J Obstet Gynaecol Canada* 2004;**26**:633–40. doi:10.1016/S1701-2163(16)30610-7  
21  
22  
23  
24 47 Janssen PA, Klein MC, Harris SJ, *et al.* Single Room Maternity Care and Client Satisfaction. *Birth* 2000;**27**:235–43. doi:10.1046/j.1523-536x.2000.00235.x  
25  
26  
27  
28 48 Lester BM, Hawes K, Abar B, *et al.* Single-Family Room Care and Neurobehavioral and Medical Outcomes in Preterm Infants. *Pediatrics* 2014;**134**:754–60. doi:10.1542/peds.2013-4252  
29  
30  
31 49 Swanson JR, Peters C, Lee BH. NICU redesign from open ward to private room: a longitudinal study of parent and staff perceptions. *J Perinatol* 2013;**33**:466–9. doi:10.1038/jp.2012.157  
32  
33  
34 50 Toivonen M, Lehtonen L, Löyttyniemi E, *et al.* Effects of single-family rooms on nurse-parent and nurse-infant interaction in neonatal intensive care unit. *Early Hum Dev* 2017;**106–107**:59–62. doi:10.1016/j.earlhumdev.2017.01.012  
35  
36  
37  
38 51 van der Hoeven A, Bekker V, Jansen SJ, *et al.* Impact of transition from open bay to single room design neonatal intensive care unit on multidrug-resistant organism colonization rates. *J Hosp Infect* 2022;**120**:90–7. doi:10.1016/j.jhin.2021.12.006  
39  
40  
41  
42 52 Bodack E, Schenk O, Karutz H. Die Einrichtung von Einzelzimmern auf neonatologischen Intensivstationen – Auswirkungen auf die Betreuung aus Sicht der Eltern. *Z Geburtshilfe Neonatol* 2016;**220**:124–9. doi:10.1055/s-0042-102886  
43  
44  
45  
46 53 Erdeve O, Arsan S, Yigit S, *et al.* The impact of individual room on rehospitalization and health service utilization in preterms after discharge. *Acta Paediatrica* 2008;**97**:1351–7. doi:10.1111/j.1651-2227.2008.00889.x  
47  
48  
49  
50 54 Campbell-Yeo M, Kim T, Disher T, *et al.* Do Single-Family Rooms Increase Parental Presence, Involvement, and Maternal Well-Being in Neonatal Intensive Care? *J Perinat Neonatal Nurs* 2021;**35**:350–61. doi:10.1097/JPN.0000000000000600  
51  
52  
53  
54 55 Dowling DA, Blatz MA, Graham G. Mothers' Experiences Expressing Breast Milk for Their Preterm Infants: Does NICU Design Make a Difference? *Adv Neonatal Care* 2012;**12**:377–84. doi:10.1097/ANC.0b013e318265b299  
55  
56  
57  
58  
59  
60

- 1  
2  
3 56 Hourigan SK, Subramanian P, Hasan NA, *et al.* Comparison of Infant Gut and Skin Microbiota, Resistome and Virulome Between Neonatal Intensive Care Unit (NICU) Environments. *Front Microbiol* 2018;**9**:1361. doi:10.3389/fmicb.2018.01361
- 4  
5  
6  
7  
8 57 Stevens DC, Helseth CC, Thompson PA, *et al.* A Comprehensive Comparison of Open-Bay and Single-Family-Room Neonatal Intensive Care Units at Sanford Children’s Hospital. *HERD* 2012;**5**:23–39. doi:10.1177/193758671200500403
- 9  
10  
11  
12 58 Grundt H, Tandberg BS, Flacking R, *et al.* Associations Between Single-Family Room Care and Breastfeeding Rates in Preterm Infants. *J Hum Lact* 2021;**37**:593–602. doi:10.1177/0890334420962709
- 13  
14  
15  
16 59 Vohr B, McGowan E, McKinley L, *et al.* Differential Effects of the Single-Family Room Neonatal Intensive Care Unit on 18- to 24-Month Bayley Scores of Preterm Infants. *J Pediatr* 2017;**185**:42-48.e1. doi:10.1016/j.jpeds.2017.01.056
- 17  
18  
19  
20  
21 60 Pineda RG, Stransky KE, Rogers C, *et al.* The single-patient room in the NICU: maternal and family effects. *J Perinatol* 2012;**32**:545–51. doi:10.1038/jp.2011.144
- 22  
23  
24 61 Nassery W, Landgren K. Parents’ Experience of Their Sleep and Rest When Admitted to Hospital with Their Ill Child: A Qualitative Study. *Compr Child Adolesc Nurs* 2019;**42**:265–79. doi:10.1080/24694193.2018.1528310
- 25  
26  
27  
28 62 Stevens DC, Helseth CC, Khan MA, *et al.* A Comparison of Parent Satisfaction in an Open-Bay and Single-Family Room Neonatal Intensive Care Unit. *HERD* 2011;**4**:110–23. doi:10.1177/193758671100400309
- 29  
30  
31  
32  
33 63 Rechel B, European Health Property Network, European Observatory on Health Systems and Policies, editors. *Capital investment for health: case studies from Europe*. Copenhagen, Denmark: : European Health Property Network : European Observatory on Health Systems and Policies 2009.
- 34  
35  
36  
37  
38 64 Lester BM, Salisbury AL, Hawes K, *et al.* 18-Month Follow-Up of Infants Cared for in a Single-Family Room Neonatal Intensive Care Unit. *J Pediatr* 2016;**177**:84–9. doi:10.1016/j.jpeds.2016.06.069
- 39  
40  
41  
42  
43 65 Monson BB, Eaton-Rosen Z, Kapur K, *et al.* Differential Rates of Perinatal Maturation of Human Primary and Nonprimary Auditory Cortex. *eNeuro* 2018;**5**:ENEURO.0380-17.2017. doi:10.1523/ENEURO.0380-17.2017
- 44  
45  
46  
47 66 Erdevé O, Arsan S, Canpolat F, *et al.* Does Individual Room Implemented Family-Centered Care Contribute to Mother–Infant Interaction in Preterm Deliveries Necessitating Neonatal Intensive Care Unit Hospitalization? *Amer J Perinatol* 2009;**26**:159–64. doi:10.1055/s-0028-1095186
- 48  
49  
50  
51 67 Felice Tong YY, Karunaratne S, Youlden D, *et al.* The Impact of Room-Sharing on Length of Stay After Total Hip or Knee Arthroplasty: A Retrospective Study. *Arthroplasty Today* 2021;**8**:289-294.e2. doi:10.1016/j.artd.2021.03.017
- 52  
53  
54  
55 68 Scottish Intercollegiate Guidelines Network, Healthcare Improvement Scotland. *Delirium: a booklet for people who have experienced delirium, and for their carers*. 2020.
- 56  
57  
58  
59 69 Blandfort S, Gregersen M, Rahbek K, *et al.* Single-bed rooms in a geriatric ward prevent delirium in older patients. *Aging Clin Exp Res* 2020;**32**:141–7. doi:10.1007/s40520-019-01173-y
- 60

- 1  
2  
3 70 Bonizzoli M, Bigazzi E, Peduto C, *et al.* Microbiological survey following the conversion from a  
4 bay-room to single-room intensive care unit design. *J Hosp Infect* 2011;**77**:84–6.  
5 doi:10.1016/j.jhin.2010.07.018  
6
- 7 71 Darley ESR, Vasant J, Leeming J, *et al.* Impact of moving to a new hospital build, with a high  
8 proportion of single rooms, on healthcare-associated infections and outbreaks. *J Hosp Infect*  
9 2018;**98**:191–3. doi:10.1016/j.jhin.2017.06.027  
10
- 11 72 Ferri M, Zygun DA, Harrison A, *et al.* Evidence-based design in an intensive care unit: End-user  
12 perceptions. *BMC Anesthesiol* 2015;**15**:57. doi:10.1186/s12871-015-0038-4  
13  
14
- 15 73 Gregersen M, Mellekjær A, Foss CH, *et al.* Use of single-bed rooms may decrease the  
16 incidence of hospital-acquired infections in geriatric patients: A retrospective cohort study in  
17 Central Denmark region. *J Health Serv Res Policy* 2021;**26**:282–8.  
18 doi:10.1177/1355819621994866  
19
- 20 74 Halaby T, al Naiemi N, Beishuizen B, *et al.* Impact of single room design on the spread of multi-  
21 drug resistant bacteria in an intensive care unit. *Antimicrob Resist Infect Control* 2017;**6**:117.  
22 doi:10.1186/s13756-017-0275-z  
23  
24
- 25 75 McDonald EG, Dendukuri N, Frenette C, *et al.* Time-Series Analysis of Health Care–Associated  
26 Infections in a New Hospital With All Private Rooms. *JAMA Intern Med* 2019;**179**:1501.  
27 doi:10.1001/jamainternmed.2019.2798  
28
- 29 76 Song X, Soghier L, Floyd TT, *et al.* Reassessing the need for active surveillance of extended-  
30 spectrum beta-lactamase–producing Enterobacteriaceae in the neonatal intensive care  
31 population. *Infect Control Hosp Epidemiol* 2018;**39**:1436–41. doi:10.1017/ice.2018.260  
32  
33
- 34 77 Teltsch DY, Hanley J, Loo V, *et al.* Infection Acquisition Following Intensive Care Unit Room  
35 Privatization. *Arch Intern Med* 2011;**171**:32–8. doi:10.1001/archinternmed.2010.469  
36
- 37 78 van Veenendaal NR, van der Schoor SRD, Heideman WH, *et al.* Family integrated care in single  
38 family rooms for preterm infants and late-onset sepsis: a retrospective study and mediation  
39 analysis. *Pediatr Res* 2020;**88**:593–600. doi:10.1038/s41390-020-0875-9  
40
- 41 79 Vietri NJ, Dooley DP, Davis CE, *et al.* The effect of moving to a new hospital facility on the  
42 prevalence of methicillin-resistant *Staphylococcus aureus*. *Am J Infect Control* 2004;**32**:262–7.  
43 doi:10.1016/j.ajic.2003.12.006  
44
- 45 80 Walsh WF, McCullough KL, White RD. Room for improvement: nurses' perceptions of providing  
46 care in a single room newborn intensive care setting. *Adv Neonatal Care* 2006;**6**:261–70.  
47 doi:10.1016/j.adnc.2006.06.002  
48  
49
- 50 81 Bevan V, Edwards C, Woodhouse K, *et al.* Dignified care for older people: Mixed methods  
51 evaluation of the impact of the hospital environment - single rooms or multi-bedded wards:  
52 *Healthy Aging Res* 2016;**5**:1–8. doi:10.1097/01.HXR.0000511879.99010.5d  
53
- 54 82 Bocquet A, Wintenberger C, Lupo J, *et al.* Description of an influenza outbreak in a French  
55 university hospital and risk factors of nosocomial influenza. *Eur J Clin Microbiol Infect Dis*  
56 2021;**40**:879–84. doi:10.1007/s10096-020-04070-9  
57  
58  
59  
60

- 1  
2  
3 83 Cobo J, Asensio Á, Moreno S, *et al.* Risk factors for nosocomial transmission of multidrug-resistant tuberculosis due to *Mycobacterium bovis* among HIV-infected patients. *Int J Tuberc Lung Dis* 2001;**5**:413–8.
- 4  
5  
6  
7 84 Everts RJ, Hanger HC, Jennings LC, *et al.* Outbreaks of influenza A among elderly hospital inpatients. *N Z Med J* 1996;**109**:272–4.
- 8  
9  
10 85 Ford-Jones EL, Mindorff CM, Gold R, *et al.* The incidence of viral-associated diarrhea after admission to a pediatric hospital. *American Journal of Epidemiology* 1990;**131**:711–8. doi:10.1093/oxfordjournals.aje.a115555
- 11  
12  
13  
14 86 Fraenkel Cj, Inghammar M, Söderlund-Strand A, *et al.* Risk factors for hospital norovirus outbreaks: impact of vomiting, genotype, and multi-occupancy rooms. *Journal of Hospital Infection* 2018;**98**:398–403. doi:10.1016/j.jhin.2018.01.011
- 15  
16  
17  
18 87 Jou J, Ebrahim J, Shofer FS, *et al.* Environmental Transmission of *Clostridium difficile*: Association Between Hospital Room Size and *C. difficile* Infection. *Infect Control Hosp Epidemiol* 2015;**36**:564–8. doi:10.1017/ice.2015.18
- 19  
20  
21  
22 88 Lorenz SG, Dreher HM. Hospital Room Design and Health Outcomes of the Aging Adult. *HERD* 2011;**4**:14.
- 23  
24  
25  
26 89 Mattner F, Rüden AS, Mattner L, *et al.* Thoracic organ transplantation may not increase the risk of bacterial transmission in intensive care units. *Int J Hyg Environ Health* 2007;**210**:139–45. doi:10.1016/j.ijheh.2006.08.008
- 27  
28  
29  
30 90 Morgan H. Single and shared accommodation for young patients in hospital. *Paediatr Nurs* 2010;**22**:20–4. doi:10.7748/paed2010.10.22.8.20.c7997
- 31  
32  
33  
34 91 Munier-Marion E, Bénet T, Régis C, *et al.* Hospitalization in double-occupancy rooms and the risk of hospital-acquired influenza: a prospective cohort study. *Clin Microbiol Infect* 2016;**22**:461.e7-461.e9. doi:10.1016/j.cmi.2016.01.010
- 35  
36  
37  
38 92 Park S-H, Stockbridge EL, Miller TL, *et al.* Private patient rooms and hospital-acquired methicillin-resistant *Staphylococcus aureus*: A hospital-level analysis of administrative data from the United States. *PLoS ONE* 2020;**15**:e0235754. doi:10.1371/journal.pone.0235754
- 39  
40  
41  
42 93 Pilmis B, Billard-Pomares T, Martin M, *et al.* Can environmental contamination be explained by particular traits associated with patients? *J Hosp Infect* 2020;**104**:293–7. doi:10.1016/j.jhin.2019.12.011
- 43  
44  
45  
46 94 Quach C, Shah R, Rubin LG. Burden of Healthcare-Associated Viral Respiratory Infections in Children’s Hospitals. *J Pediatr Infect Dis Soc* 2018;**7**:18–24. doi:10.1093/jpids/piw072
- 47  
48  
49  
50 95 Sadatsafavi H, Niknejad B, Zadeh R, *et al.* Do cost savings from reductions in nosocomial infections justify additional costs of single-bed rooms in intensive care units? A simulation case study. *J Crit Care* 2016;**31**:194–200. doi:10.1016/j.jcrc.2015.10.010
- 51  
52  
53  
54 96 Stiller A, Schröder C, Gropmann A, *et al.* ICU ward design and nosocomial infection rates: a cross-sectional study in Germany. *J Hosp Infect* 2017;**95**:71–5. doi:10.1016/j.jhin.2016.10.011
- 55  
56  
57  
58  
59  
60

- 1  
2  
3 97 Vaisman A, Jula M, Wagner J, *et al.* Examining the association between hospital-onset  
4 Clostridium difficile infection and multiple-bed room exposure: a case-control study. *Infect*  
5 *Control Hosp Epidemiol* 2018;**39**:1068–73. doi:10.1017/ice.2018.163  
6  
7  
8 98 Washam MC, Ankrum A, Haberman BE, *et al.* Risk Factors for *Staphylococcus aureus*  
9 Acquisition in the Neonatal Intensive Care Unit: A Matched Case-Case-Control Study. *Infect*  
10 *Control Hosp Epidemiol* 2018;**39**:46–52. doi:10.1017/ice.2017.234  
11  
12 99 O’Neill L, Park S-H, Rosinia F. The role of the built environment and private rooms for reducing  
13 central line-associated bloodstream infections. *PLoS ONE* 2018;**13**:e0201002.  
14 doi:10.1371/journal.pone.0201002  
15  
16 100 Kinnula SE, Renko M, Tapiainen T, *et al.* Hospital-associated infections during and after care in  
17 a paediatric infectious disease ward. *J Hosp Infect* 2008;**68**:334–40.  
18 doi:10.1016/j.jhin.2008.02.004  
19  
20 101 Kinnula S, Buettcher M, Tapiainen T, *et al.* Hospital-associated infections in children: a  
21 prospective post-discharge follow-up survey in three different paediatric hospitals. *J Hosp*  
22 *Infect* 2012;**80**:17–24. doi:10.1016/j.jhin.2011.09.007  
23  
24 102 Liu LX, Mozafarinia M, Axelin A, *et al.* Parents’ Experiences of Support in NICU Single-Family  
25 Rooms. *Neonatal Netw* 2019;**38**:88–97. doi:10.1891/0730-0832.38.2.88  
26  
27 103 Reid J, Wilson K, Anderson KE, *et al.* Older inpatients’ room preference: single versus shared  
28 accommodation. *Age Ageing* 2015;**44**:331–3. doi:10.1093/ageing/afu158  
29  
30 104 Poncette A-S, Wunderlich MM, Spies C, *et al.* Patient Monitoring Alarms in an Intensive Care  
31 Unit: Observational Study With Do-It-Yourself Instructions. *J Med Internet Res* 2021;**23**:e26494.  
32 doi:10.2196/26494  
33  
34 105 Janssen PA, Dennis C-L, Reime B. Development and psychometric testing of The Care in  
35 Obstetrics: Measure for Testing Satisfaction (COMFORTS) scale. *Res Nurs Health* 2006;**29**:51–  
36 60. doi:10.1002/nur.20112  
37  
38 106 Anåker A, von Koch L, Heylighen A, *et al.* “It’s Lonely”: Patients’ Experiences of the Physical  
39 Environment at a Newly Built Stroke Unit. *HERD* 2019;**12**:141–52.  
40  
41 107 Carlson B, Walsh S, Wergin T, *et al.* Challenges in design and transition to a private room model  
42 in the neonatal intensive care unit. *Adv Neonatal Care* 2006;**6**:271–80.  
43 doi:10.1016/j.adnc.2006.06.008  
44  
45 108 Curtis P, Northcott A. The impact of single and shared rooms on family-centred care in  
46 children’s hospitals. *J Clin Nurs* 2017;**26**:1584–96. doi:10.1111/jocn.13485  
47  
48 109 Florey L, Flynn R, Isles C. Patient Preferences for Single Rooms or Shared Accommodation in a  
49 District General Hospital. *Scott Med J* 2009;**54**:5–8. doi:10.1258/rsmsmj.54.2.5  
50  
51 110 Jones L, Peters K, Rowe J, *et al.* The Influence of Neonatal Nursery Design on Mothers’  
52 Interactions in the Nursery. *J Pediatr Nurs* 2016;**31**:e301-312. doi:10.1016/j.pedn.2016.05.005  
53  
54 111 Milford C, Zapalo B, Davis G. Transition to an Individual-Room NICU Design: Process and  
55 Outcome Measures. *Neonatal Netw* 2008;**27**:299–305. doi:10.1891/0730-0832.27.5.299  
56  
57  
58  
59  
60



- 1  
2  
3 112 Real K, Fay L. Using Systems Theory to Examine Patient and Nurse Structures, Processes, and  
4 Outcomes in Centralized and Decentralized Units. *HERD* 2018;**11**:22–37.  
5 doi:10.1177/1937586718763794  
6  
7  
8 113 Apple M. A Comparative Evaluation of Swedish Intensive Care Patient Rooms. *HERD*  
9 2014;**7**:78–93. doi:10.1177/193758671400700306  
10  
11 114 Boztepe H, Çınar S, Ay A. School-age children’s perception of the hospital experience. *J Child*  
12 *Health Care* 2017;**21**:162–70. doi:10.1177/1367493517690454  
13  
14 115 Deitrick LM, Bokovoy J, Panik A. The “Dance” Continues ... Evaluating Differences in Call Bell  
15 Use Between Patients in Private Rooms and Patients in Double Rooms Using Ethnography. *J*  
16 *Nurs Care Qual* 2010;**25**:279–87. doi:10.1097/NCQ.0b013e3181dde039  
17  
18 116 Douglas CH, Douglas MR. Patient-centred improvements in health-care built environments:  
19 perspectives and design indicators. *Health Expect* 2005;**8**:264–76. doi:10.1111/j.1369-  
20 7625.2005.00336.x  
21  
22  
23 117 Hosseini SB, Bagheri M. Comparison of Patient Satisfaction with Single Patient Rooms Versus  
24 Shared Patient Rooms. *Ann Mil Health Sci Res* 2017;**15**:e80199. doi:10.5812/amh.80199  
25  
26 118 Malcolm HA. Does privacy matter? Former patients discuss their perceptions of privacy in  
27 shared hospital rooms. *Nurs Ethics* 2005;**12**:156–66. doi:10.1191/0969733005ne772oa  
28  
29 119 Nash P, Vanhoof J, Hall S, *et al.* Randomized Crossover Comparison of Injection Site Pain with  
30 40 mg/0.4 or 0.8 mL Formulations of Adalimumab in Patients with Rheumatoid Arthritis.  
31 *Rheumatol Ther* 2016;**3**:257–70. doi:10.1007/s40744-016-0041-3  
32  
33  
34 120 Persson E, Määttä S. To provide care and be cared for in a multiple-bed hospital room: care in a  
35 multiple-bed hospital room. *Scand J Caring Sci* 2012;**26**:663–70. doi:10.1111/j.1471-  
36 6712.2012.00976.x  
37  
38 121 Persson E, Anderberg P, Kristensson Ekwall A. A room of one’s own - Being cared for in a  
39 hospital with a single-bed room design. *Scand J Caring Sci* 2015;**29**:340–6.  
40 doi:10.1111/scs.12168  
41  
42 122 Rowlands J, Noble S. How does the environment impact on the quality of life of advanced  
43 cancer patients? A qualitative study with implications for ward design. *Palliat Med*  
44 2008;**22**:768–74. doi:10.1177/0269216308093839  
45  
46 123 Schalkers I, Dedding CWM, Bunders JFG. ‘[I would like] a place to be alone, other than the  
47 toilet’ - Children’s perspectives on paediatric hospital care in the Netherlands. *Health Expect*  
48 2015;**18**:2066–78. doi:10.1111/hex.12174  
49  
50  
51 124 Bradbury-Jones C, Rattray J, Jones M, *et al.* Promoting the health, safety and welfare of adults  
52 with learning disabilities in acute care settings: a structured literature review. *Journal of*  
53 *Clinical Nursing* 2013;**22**:1497–509. doi:10.1111/jocn.12109  
54  
55 125 Mental Welfare Commission for Scotland. *Psychiatr bull* 1991;**15**:254–5.  
56 doi:10.1192/pb.15.4.254-a  
57  
58  
59  
60

- 1  
2  
3 126 Anåker A, von Koch L, Sjöstrand C, *et al.* A comparative study of patients' activities and  
4 interactions in a stroke unit before and after reconstruction—The significance of the built  
5 environment. *PLoS ONE* 2017;**12**:e0177477. doi:10.1371/journal.pone.0177477  
6  
7 127 Cusack L, Wiechula R, Schultz T, *et al.* Anticipated advantages and disadvantages of a move to  
8 100% single-room hospital in Australia: A case study. *J Nurs Manag* 2019;**27**:963–70.  
9 doi:10.1111/jonm.12753  
10  
11 128 Kainiemi E, Hongisto P, Lehtonen L, *et al.* Effects of single family room architecture on parent–  
12 infant closeness and family centered care in neonatal environments—a single-center pre–post  
13 study. *J Perinatol* 2021;**41**:2244–51. doi:10.1038/s41372-021-01137-z  
14  
15 129 Rosbergen ICM, Tonello I, Clark RA, *et al.* Does hospital design impact on patient activity levels  
16 and time spent alone? *Disabil Rehabil* 2022;**44**:3173–80. doi:10.1080/09638288.2020.1861117  
17  
18 130 Darcy Mahoney A, White RD, Velasquez A, *et al.* Impact of restrictions on parental presence in  
19 neonatal intensive care units related to coronavirus disease 2019. *J Perinatol* 2020;**40**:36–46.  
20 doi:10.1038/s41372-020-0753-7  
21  
22 131 de Matos LBN, Fumis RRL, Nassar Junior AP, *et al.* Single-Bed or Multibed Room Designs  
23 Influence ICU Staff Stress and Family Satisfaction, But Do Not Influence ICU Staff Burnout.  
24 *HERD* 2020;**13**:234–42. doi:10.1177/1937586719878445  
25  
26 132 Pease NJ, Finlay IG. Do patients and their relatives prefer single cubicles or shared wards?  
27 *Palliat Med* 2002;**16**:445–6. doi:10.1191/0269216302pm577xx  
28  
29 133 Taylor E, Card AJ, Piatkowski M. Single-Occupancy Patient Rooms: A Systematic Review of the  
30 Literature Since 2006. *HERD* 2018;**11**:85–100. doi:10.1177/1937586718755110  
31  
32 134 Chaudhury H, Mahmood A, Valente M. The use of single patient rooms versus multiple  
33 occupancy rooms in acute care environments.  
34 2004. [https://www.healthdesign.org/sites/default/files/use\\_of\\_single\\_patient\\_rooms\\_v\\_multi](https://www.healthdesign.org/sites/default/files/use_of_single_patient_rooms_v_multiple_occ_rooms-acute_care.pdf)  
35 [ple\\_occ\\_rooms-acute\\_care.pdf](https://www.healthdesign.org/sites/default/files/use_of_single_patient_rooms_v_multiple_occ_rooms-acute_care.pdf) (accessed 21 Jul 2022).  
36  
37 135 Maben J, Griffiths P, Penfold C, *et al.* *Evaluating a major innovation in hospital design:*  
38 *workforce implications and impact on patient and staff experiences of all single room hospital*  
39 *accommodation.* Southampton (UK): : NIHR Journals Library 2015.  
40 <http://www.ncbi.nlm.nih.gov/books/NBK274434/> (accessed 21 Jul 2022).  
41  
42 136 Pyrke RJL, McKinnon MC, McNeely HE, *et al.* Evidence-Based Design Features Improve Sleep  
43 Quality Among Psychiatric Inpatients. *HERD* 2017;**10**:52–63. doi:10.1177/1937586716684758  
44  
45 137 Van Enk RA, Steinberg F. Comparison of Private Room with Multiple-Bed Ward Neonatal  
46 Intensive Care Unit Environments. *HERD* 2011;**5**:52–63. doi:10.1177/193758671100500105  
47  
48 138 Eberhard-Gran M, Eskild A, Opjordsmoen S, *et al.* Postnatal care--sleep, rest and satisfaction.  
49 *Tidsskr Nor Laegeforen* 2000;**120**:1405–9.  
50  
51 139 Edéll-Gustafsson U, Angelhoff C, Johnsson E, *et al.* Hindering and buffering factors for parental  
52 sleep in neonatal care. A phenomenographic study. *J Clin Nurs* 2015;**24**:717–27.  
53 doi:10.1111/jocn.12654  
54  
55  
56  
57  
58  
59  
60

- 1  
2  
3 140 Foo CT, O'Driscoll DM, Ogeil RP, *et al.* Barriers to sleep in acute hospital settings. *Sleep Breath*  
4 2022;**26**:855–63. doi:10.1007/s11325-021-02415-y  
5  
6 141 Meyer TJ, Eveloff SE, Bauer MS, *et al.* Adverse Environmental Conditions in the Respiratory and  
7 Medical ICU Settings. *Chest* 1994;**105**:1211–6. doi:10.1378/chest.105.4.1211  
8  
9 142 Sakr N, Hallit S, Mattar H. Incidence of and Factors Associated with New-Onset Insomnia  
10 Among Lebanese Hospitalised Patients: A single-centre study. *Sultan Qaboos Univ Med J*  
11 2021;**21**:e210-220. doi:10.18295/squmj.2021.21.02.009  
12  
13 143 Tegnestedt C, Günther A, Reichard A, *et al.* Levels and sources of sound in the intensive care  
14 unit - an observational study of three room types: Levels and sources of sound in a  
15 multidisciplinary ICU. *Acta Anaesthesiol Scand* 2013;**57**:1041–50. doi:10.1111/aas.12138  
16  
17 144 Stevens DC, Helseth CC, Khan MA, *et al.* A Comparison of Parent Satisfaction in an Open-Bay  
18 and Single-Family Room Neonatal Intensive Care Unit. *HERD* 2011;**4**:110–23.  
19 doi:10.1177/193758671100400309  
20  
21 145 Labarère J, Fourny M, Jean-Phillippe V, *et al.* Refinement and validation of a French in-patient  
22 experience questionnaire. *Int J Health Care Qual Assur Inc Leadersh Health Serv* 2004;**17**:17–  
23 25. doi:10.1108/09526860410515909  
24  
25 146 Miller NO, Friedman SB, Coupey SM. Adolescent preferences for rooming during  
26 hospitalization. *J Adolesc Health* 1998;**23**:89–93. doi:10.1016/S1054-139X(98)00015-9  
27  
28 147 Watson J, DeLand M, Gibbins S, *et al.* Improvements in Staff Quality of Work Life and Family  
29 Satisfaction Following the Move to Single-Family Room NICU Design. *Adv Neonatal Care*  
30 2014;**14**:129–36. doi:10.1097/ANC.0000000000000046  
31  
32 148 Boardman AE, Forbes D. A Benefit-Cost Analysis of Private and Semi-Private Hospital Rooms. *J*  
33 *Benefit Cost Anal* 2011;**2**:1–27. doi:10.2202/2152-2812.1050  
34  
35 149 Ruka K, Kenichi K, Juno K. Comparative studies on hospital-bed management between all  
36 single-room wards and mixed multi-bed room wards. *Journal of Architecture and Planning*  
37 *(Transactions of AIJ)* 2013;**78**:765–73.  
38  
39 150 Stevens DC, Thompson PA, Helseth CC, *et al.* A comparison of the direct cost of care in an  
40 open-bay and single-family room NICU. *J Perinatol* 2014;**34**:830–5. doi:10.1038/jp.2014.178  
41  
42 151 Blandfort S, Gregersen M, Rahbek K, *et al.* Analgesic and psychoactive medications and the risk  
43 of falls in relation to delirium in single-bed rooms compared to multiple-bed rooms in geriatric  
44 inpatients. *Aging Clin Exp Res* 2020;**32**:1493–9. doi:10.1007/s40520-019-01335-y  
45  
46 152 Reed G, Schmid M. Nursing Implementation of Single-Room Maternity Care. *J Obstet Gynecol*  
47 *Neonatal Nurs* 1986;**15**:386–9. doi:10.1111/j.1552-6909.1986.tb01411.x  
48  
49 153 Serval A-C, Rideau Batista Novais A. Single-family rooms for neonatal intensive care units  
50 impacts on preterm newborns, families, and health-care staff. A systematic literature review.  
51 *Arch Pediatr* 2016;**23**:921–6. doi:10.1016/j.arcped.2016.04.022  
52  
53 154 Shahheidari M, Homer C. Impact of the design of neonatal intensive care units on neonates,  
54 staff, and families: a systematic literature review. *J Perinat Neonatal Nurs* 2012;**26**:260–6; quiz  
55 267–8. doi:10.1097/JPN.0b013e318261ca1d  
56  
57  
58  
59  
60

- 1  
2  
3 155 Soleimani F, Azari N, Ghiasvand H, *et al.* Do NICU developmental care improve cognitive and  
4 motor outcomes for preterm infants? A systematic review and meta-analysis. *BMC Pediatr*  
5 2020;**20**:67. doi:10.1186/s12887-020-1953-1  
6  
7 156 van de Glind I, de Roode S, Goossensen A. Do patients in hospitals benefit from single rooms?  
8 A literature review. *Health Policy* 2007;**84**:153–61. doi:10.1016/j.healthpol.2007.06.002  
9  
10 157 Kelly R, Brown D, McCance T, *et al.* The experience of person-centred practice in a 100% single-  
11 room environment in acute care settings-A narrative literature review. *J Clin Nurs*  
12 2019;**28**:2369–85. doi:10.1111/jocn.14729  
13  
14 158 Saha S, Noble H, Xyrichis A, *et al.* Mapping the impact of ICU design on patients, families and  
15 the ICU team: A scoping review. *Journal of Critical Care* 2022;**67**:3–13.  
16 doi:10.1016/j.jcrc.2021.07.002  
17  
18  
19  
20  
21  
22  
23  
24  
25  
26  
27  
28  
29  
30  
31  
32  
33  
34  
35  
36  
37  
38  
39  
40  
41  
42  
43  
44  
45  
46  
47  
48  
49  
50  
51  
52  
53  
54  
55  
56  
57  
58  
59  
60

1  
2  
3 **Figure Legends**  
4  
5

6 **Figure 1. Selection of papers for review**  
7

8 **Figure 2. Percentage of studies reporting data in favour of either single-room or shared-room**  
9 **design, according to the type of data available and outcome reported**  
10

11 **Figure 3. Clinical outcomes represented by the total sample size with data for that outcome, by**  
12 **level of care and the type of data reported and room design favoured**  
13

14 **Figure 4. Patient-experience outcomes represented by the total sample size with data for that**  
15 **outcome, by level of care and the type of data reported and room design favoured**  
16

17 **Figure 5. Economic outcomes represented by the total sample size with data for that outcome, by**  
18 **level of care and the type of data reported and room design favoured**  
19  
20  
21  
22  
23  
24  
25  
26  
27  
28  
29  
30  
31  
32  
33  
34  
35  
36  
37  
38  
39  
40  
41  
42  
43  
44  
45  
46  
47  
48  
49  
50  
51  
52  
53  
54  
55  
56  
57  
58  
59  
60

1  
2  
3  
4  
5  
6  
7  
8  
9  
10  
11  
12  
13  
14  
15  
16  
17  
18  
19  
20  
21  
22  
23  
24  
25  
26  
27  
28  
29  
30  
31  
32  
33  
34  
35  
36  
37  
38  
39  
40  
41  
42  
43  
44  
45  
46  
47  
48  
49  
50  
51  
52  
53  
54  
55  
56  
57  
58  
59  
60



Figure 1. Selection of papers for review

190x275mm (96 x 96 DPI)



Figure 2. Percentage of studies reporting data in favour of either single-room or shared-room design, according to the type of data available and outcome reported

144x199mm (96 x 96 DPI)

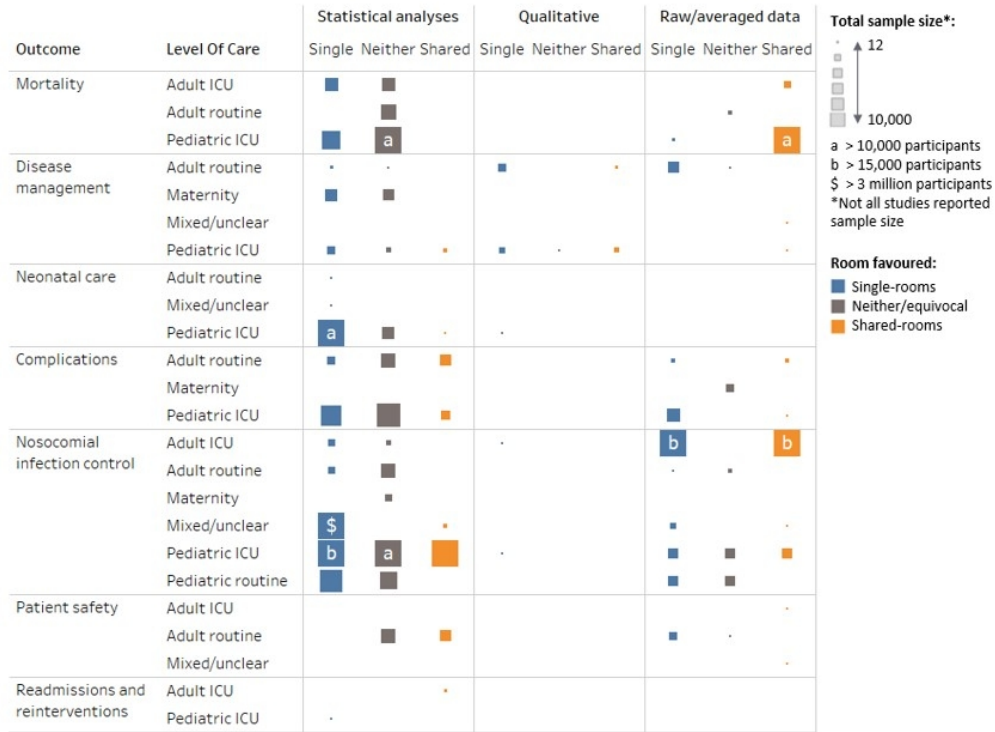

Figure 3. Clinical outcomes represented by the total sample size with data for that outcome, by level of care and the type of data reported and room design favoured

221x165mm (96 x 96 DPI)





Figure 4. Patient-experience outcomes represented by the total sample size with data for that outcome, by level of care and the type of data reported and room design favoured

209x195mm (96 x 96 DPI)



Figure 5. Economic outcomes represented by the total sample size with data for that outcome, by level of care and the type of data reported and room design favoured

239x126mm (96 x 96 DPI)

## Appendix

The data presented in summary tables 2–17 have been condensed substantially from what was reported in the papers. For each table there is one row per paper, detailing the setting and population samples in the study, and the outcomes reported according to whether the data were in favour of a single-room design, a shared-room design, or neither in favour nor against either design. Where statistical analyses were conducted the statistical significance is reported in the tables however no other numerical data is presented. Where no formal analysis was reported only the label pertaining to the outcome data are presented. For example, if the proportion of deaths was lower in the single-room design then “% deaths” is reported in the table under the heading “Data favours single-room design”, or if qualitative analysis of interviews reports that patients would prefer a shared-room design because it is more sociable then “Qualitative (patient preference, social)” is reported in the table under the heading “Data favours shared-room design”.

### List of tables

|                                                                                                                 |    |
|-----------------------------------------------------------------------------------------------------------------|----|
| Table 1. Summary of study quality scores .....                                                                  | 2  |
| Table 2. Summary of studies reporting mortality data .....                                                      | 7  |
| Table 3. Summary of studies reporting data on patient care and disease management .....                         | 9  |
| Table 4. Summary of studies reporting data on maternity and neonatal care .....                                 | 12 |
| Table 5. Summary of studies reporting data on complications of disease .....                                    | 20 |
| Table 6. Summary of studies reporting data on prevention of infection.....                                      | 25 |
| Table 7 Summary of studies reporting data on patient safety .....                                               | 35 |
| Table 8. Summary of studies reporting data on readmissions and reinterventions .....                            | 37 |
| Table 9. Summary of studies reporting views on privacy .....                                                    | 38 |
| Table 10. Summary of studies reporting views on patients' loneliness/isolation and family contact .....         | 44 |
| Table 11. Summary of studies reporting patient's views on noise, disturbance and sleep .....                    | 56 |
| Table 12. Summary of studies reporting patients' views on satisfaction with care.....                           | 63 |
| Table 13. Summary of studies reporting data on patient monitoring and safeguarding.....                         | 75 |
| Table 14. Summary of studies reporting views on patient confidentiality .....                                   | 78 |
| Table 15. Summary of studies reporting data on availability of beds, space requirements, and capital costs..... | 80 |
| Table 16. Summary of studies reporting data on length of stay.....                                              | 83 |
| Table 17. Summary of studies reporting data on costs of care .....                                              | 89 |
| References.....                                                                                                 | 92 |

!

**Key and abbreviations**<sup>a</sup>=adjusted<sup>u</sup>=univariate analysis<sup>m</sup>=multivariate analysisNS=not statistically significant ( $p < 0.05$  is considered statistically significant)

BSI, bloodstream infection; LOS=length of stay; PEMR=physician estimate of mortality risk; SFR=Single family room; SRMC=Single room maternity care

Text is in italics if it is unclear where the true benefit lies, for example where the data is significantly greater for one room type compared to another but the interpretation of benefit may be subjective.

Cells coloured in blue are where a formal comparative statistical analysis was reported.

**Table 1. Summary of study quality scores**

| Citation                                | Study methodology                                                 | QA score |
|-----------------------------------------|-------------------------------------------------------------------|----------|
| Adamson 2003 <sup>1</sup>               | SLR                                                               | 82%      |
| Anåker et al 2017 <sup>2</sup>          | Prospective observational, before and after hospital relocation   | 59%      |
| Anåker et al 2019 <sup>3</sup>          | Qualitative, before and after hospital relocation                 | 90%      |
| Apple 2014 <sup>4</sup>                 | Prospective observational, qualitative                            | 52%      |
| Bevan et al 2016 <sup>5</sup>           | Prospective observational                                         | 59%      |
| Blandfort et al 2019 <sup>6</sup>       | Prospective observational, before and after hospital relocation   | 67%      |
| Blandfort et al 2019 <sup>7</sup>       | Prospective observational, before and after hospital relocation   | 67%      |
| Boardman & Forbes 2011 <sup>8</sup>     | Economic analysis                                                 | 91%      |
| Bocquet et al 2021 <sup>9</sup>         | Retrospective observational, case-control                         | 74%      |
| Bodack et al 2016 <sup>10</sup>         | Prospective observational                                         | 56%      |
| Bonizzoli et al 2011 <sup>11</sup>      | Retrospective observational, before and after hospital relocation | 30%      |
| Boztepe et al 2017 <sup>12</sup>        | Prospective observational                                         | 63%      |
| Bracco et al 2007 <sup>13</sup>         | Prospective observational                                         | 74%      |
| Bradbury-Jones et al 2013 <sup>14</sup> | SLR                                                               | 86%      |
| Campbell-Yeo et al 2021 <sup>15</sup>   | Prospective case-control, before and after hospital relocation    | 74%      |
| Cantoni et al 2009 <sup>16</sup>        | Retrospective observational, before and after hospital relocation | 67%      |
| Carlson et al 2006 <sup>17</sup>        | Prospective observational, before and after hospital relocation   | 33%      |
| Carter et al 2008 <sup>18</sup>         | Prospective observational, before and after hospital relocation   | 33%      |
| Caruso et al 2014 <sup>19</sup>         | Retrospective observational                                       | 74%      |
| Cobo et al 2001 <sup>20</sup>           | Retrospective case-control                                        | 74%      |

|    |                                           |                                                                   |      |
|----|-------------------------------------------|-------------------------------------------------------------------|------|
| 1  | Curtis & Northcott 2017 <sup>21</sup>     | Qualitative, before and after hospital relocation                 | 80%  |
| 2  | Cusack et al 2019 <sup>22</sup>           | Observational before hospital relocation                          | 56%  |
| 3  | Darcy Mahoney et al 2020 <sup>23</sup>    | Prospective observational                                         | 59%  |
| 4  | Darley et al 2018 <sup>24</sup>           | Retrospective observational, before and after hospital relocation | 56%  |
| 5  | Davis et al 2019 <sup>25</sup>            | Retrospective observational, before and after hospital relocation | 67%  |
| 6  | Deitrick et al 2010 <sup>26</sup>         | Qualitative                                                       | 90%  |
| 7  | de Matos et al 2020 <sup>27</sup>         | Prospective observational                                         | 63%  |
| 8  | Domanico et al 2010 <sup>28</sup>         | Prospective observational, before and after hospital relocation   | 63%  |
| 9  | Domanico et al 2011 <sup>29</sup>         | Prospective observational, before and after hospital relocation   | 63%  |
| 10 | Douglas & Douglas 2005 <sup>30</sup>      | Qualitative                                                       | 90%  |
| 11 | Dowdeswell et al 2004 <sup>31</sup>       | SLR                                                               | 36%  |
| 12 | Dowling et al 2012 <sup>32</sup>          | Prospective case-control, before and after hospital relocation    | 63%  |
| 13 | Eberhard-Gran et al 2000 <sup>33</sup>    | Prospective case-control                                          | 59%  |
| 14 | Edéll-Gustafsson et al 2015 <sup>34</sup> | Qualitative                                                       | 90%  |
| 15 | Ehrlander et al 2009 <sup>35</sup>        | Retrospective observational                                       | 78%  |
| 16 | Erdeve et al 2008 <sup>36</sup>           | Prospective case-control                                          | 74%  |
| 17 | Erdeve et al 2009 <sup>37</sup>           | Prospective case-control                                          | 78%  |
| 18 | Erickson et al 2011 <sup>38</sup>         | Prospective observational before and after hospital relocation    | 67%  |
| 19 | Everts et al 1996 <sup>39</sup>           | Prospective observational                                         | 52%  |
| 20 | Felice Tong et al 2018 <sup>40</sup>      | Retrospective case-control                                        | 78%  |
| 21 | Ferri et al 2015 <sup>41</sup>            | Qualitative, before and after hospital relocation                 | 100% |
| 22 | Florey et al 2009 <sup>42</sup>           | Retrospective case-control, before and after hospital relocation  | 44%  |
| 23 | Foo 2022 et al <sup>43</sup>              | Prospective observational                                         | 74%  |
| 24 | Ford-Jones et al 1990 <sup>44</sup>       | Prospective observational                                         | 52%  |
| 25 | Fraenkel et al 2018 <sup>45</sup>         | Retrospective case-control                                        | 67%  |
| 26 | Gregersen et al 2021 <sup>46</sup>        | Retrospective observational, before and after hospital relocation | 70%  |
| 27 | Grundt et al 2021 <sup>47</sup>           | Prospective case-control                                          | 67%  |
| 28 | Halaby et al 2017 <sup>48</sup>           | Retrospective observational, before and after hospital relocation | 48%  |
| 29 | Harris et al 2004 <sup>49</sup>           | Prospective case-control, before and after hospital relocation    | 74%  |
| 30 | Harris et al 2006 <sup>50</sup>           | Retrospective observational                                       | 63%  |
| 31 | Harris et al 2006 <sup>51</sup>           | Retrospective observational                                       | 52%  |
| 32 | Hosseini & Bagheri 2017 <sup>52</sup>     | Prospective observational                                         | 63%  |
| 33 | Hourigan et al 2018 <sup>53</sup>         | Prospective observational, before and after hospital relocation   | 63%  |
| 34 | Hyun et al 2021 <sup>54</sup>             | Retrospective case-control                                        | 78%  |
| 35 | Jansen et al 2021 <sup>55</sup>           | Retrospective observational, before and after hospital relocation | 63%  |

1  
2  
3  
4  
5  
6  
7  
8  
9  
10  
11  
12  
13  
14  
15  
16  
17  
18  
19  
20  
21  
22  
23  
24  
25  
26  
27  
28  
29  
30  
31  
32  
33  
34  
35  
36  
37  
38  
39  
40  
41  
42  
43  
44  
45  
46  
47

|                                                       |                                                                                        |      |
|-------------------------------------------------------|----------------------------------------------------------------------------------------|------|
| Janssen et al 2000 <sup>56</sup>                      | Prospective case-control, before and after hospital relocation                         | 56%  |
| Janssen et al 2006 <sup>57</sup>                      | Prospective observational                                                              | 59%  |
| Jones et al 2016 <sup>58</sup>                        | Qualitative, before and after hospital relocation                                      | 100% |
| Jongerden et al 2013 <sup>59</sup>                    | Prospective observational, before and after hospital relocation                        | 67%  |
| Jou et al 2015 <sup>60</sup>                          | Retrospective case-control                                                             | 74%  |
| Julian et al 2015 <sup>61</sup>                       | Retrospective observational                                                            | 78%  |
| Jung et al 2022 <sup>62</sup>                         | Retrospective observational, before and after hospital relocation                      | 67%  |
| Kainiemi et al 2021 <sup>63</sup>                     | Prospective observational, before and after hospital relocation                        | 59%  |
| Kinnula et al 2008 <sup>64</sup>                      | Prospective observational                                                              | 63%  |
| Kinnula et al 2012 <sup>65</sup>                      | Prospective observational                                                              | 67%  |
| Knight & Singh 2016 <sup>66</sup>                     | Prospective observational                                                              | 59%  |
| Kosuge et al 2013 <sup>67</sup>                       | Prospective observational, before and after hospital relocation                        | 41%  |
| Labarère et al 2004 <sup>68</sup>                     | Prospective observational                                                              | 70%  |
| Lawson & Phiri 2000 <sup>69</sup>                     | Prospective observational, before and after hospital relocation                        | 41%  |
| Lazar et al 2015 <sup>70</sup>                        | Prospective observational, before and after hospital relocation                        | 48%  |
| Lehtonen et al 2020 <sup>71</sup>                     | Prospective observational                                                              | 74%  |
| Lester et al 2014 <sup>72</sup>                       | Prospective observational, before and after hospital relocation                        | 63%  |
| Lester et al 2016 <sup>73</sup>                       | Prospective observational, before and after hospital relocation                        | 59%  |
| Liu et al 2019 <sup>74</sup>                          | Qualitative                                                                            | 100% |
| Lorenz & Dreher 2011 <sup>75</sup>                    | Retrospective case-control                                                             | 78%  |
| Maben et al 2015 <sup>76</sup>                        | Report, before and after hospital relocation with control hospitals                    | 78%  |
| Maben et al 2016 <sup>77</sup>                        | Prospective observational, before and after hospital relocation with control hospitals | 67%  |
| Malcolm 2005 <sup>78</sup>                            | Qualitative                                                                            | 80%  |
| Mattner et al 2007 <sup>79</sup>                      | Prospective observational                                                              | 74%  |
| McDonald et al 2019 <sup>80</sup>                     | Prospective observational, before and after hospital relocation                        | 48%  |
| McKeown et al 2015 <sup>81</sup>                      | Retrospective observational                                                            | 48%  |
| Mental Welfare Commission Scotland 1991 <sup>82</sup> | Report                                                                                 | 30%  |
| Meyer et al 1994 <sup>83</sup>                        | Prospective observational                                                              | 59%  |
| Milford et al 2008 <sup>84</sup>                      | Prospective observational, before and after hospital relocation                        | 30%  |
| Miller et al 1998 <sup>85</sup>                       | Prospective observational                                                              | 59%  |
| Monson et al 2018 <sup>86</sup>                       | Prospective case-control                                                               | 78%  |
| Morgan 2010 <sup>87</sup>                             | Prospective observational                                                              | 44%  |
| Munier-Marion et al 2016 <sup>88</sup>                | Prospective observational                                                              | 74%  |
| Nahas et al 2016 <sup>89</sup>                        | Retrospective observational                                                            | 56%  |

|                                                                 |                                                                       |      |
|-----------------------------------------------------------------|-----------------------------------------------------------------------|------|
| Nash et al 2021 <sup>90</sup>                                   | Prospective observational/ qualitative                                | 63%  |
| Nassery & Landgen 2019 <sup>91</sup>                            | Qualitative                                                           | 90%  |
| OECD & World Health Organization 2019 <sup>92</sup>             | Report                                                                | 14%  |
| Olson & Smith 1992 <sup>93</sup>                                | Prospective observational                                             | 52%  |
| O'Neill et al 2018 <sup>94</sup>                                | Retrospective observational                                           | 74%  |
| Park et al 2020 <sup>95</sup>                                   | Retrospective observational                                           | 63%  |
| Pease & Finlay 2002 <sup>96</sup>                               | Prospective observational                                             | 48%  |
| Persson & Määttä 2012 <sup>97</sup>                             | Qualitative                                                           | 90%  |
| Persson et al 2015 <sup>98</sup>                                | Qualitative                                                           | 90%  |
| Pilmis et al 2020 <sup>99</sup>                                 | Prospective observational                                             | 63%  |
| Pineda et al 2012 <sup>100</sup>                                | Prospective case-control                                              | 70%  |
| Poncette et al 2021 <sup>101</sup>                              | Retrospective observational                                           | 56%  |
| Puumala et al 2020 <sup>102</sup>                               | Retrospective observational, before and after hospital relocation     | 67%  |
| Pyrke et al 2017 <sup>103</sup>                                 | Prospective observational, before and after hospital relocation       | 59%  |
| Quach et al 2018 <sup>104</sup>                                 | Retrospective case-control                                            | 59%  |
| Real et al 2018 <sup>105</sup>                                  | Prospective observational, before and after hospital relocation       | 56%  |
| Reed & Shmid 1986 <sup>106</sup>                                | Narrative report, before and after hospital relocation                | 10%  |
| Reid et al 2015 <sup>107</sup>                                  | Prospective observational, before and after hospital relocation       | 48%  |
| Roos et al 2020 <sup>108</sup>                                  | Qualitative, before and after hospital relocation                     | 90%  |
| Rosbergen et al 2020 <sup>109</sup>                             | Prospective observational, before and after hospital relocation       | 74%  |
| Rowlands & Noble 2008 <sup>110</sup>                            | Qualitative                                                           | 90%  |
| Sadatsafavi et al 2016 <sup>111</sup>                           | Retrospective economic analysis                                       | 100% |
| Sadatsafavi et al 2019 <sup>112</sup>                           | Retrospective economic analysis, before and after hospital relocation | 100% |
| Sakr et al 2021 <sup>113</sup>                                  | Prospective observational                                             | 74%  |
| Schalkers et al 2015 <sup>114</sup>                             | Qualitative                                                           | 100% |
| Scottish Intercollegiate Guidelines Network 2014 <sup>115</sup> | Guideline                                                             | 73%  |
| Singh et al 2015 <sup>116</sup>                                 | Retrospective observational, before and after hospital relocation     | 70%  |
| Singh et al 2016 <sup>117</sup>                                 | Prospective observational                                             | 70%  |
| Søndergaard et al 2022 <sup>118</sup>                           | SLR                                                                   | 91%  |
| Song et al 2018 <sup>119</sup>                                  | Retrospective observational, before and after hospital relocation     | 63%  |
| Stelwagen et al 2021 <sup>120</sup>                             | Qualitative                                                           | 100% |
| Stevens et al 2011 <sup>121</sup>                               | Prospective observational, before and after hospital relocation       | 52%  |
| Stevens et al 2012 <sup>122</sup>                               | Prospective observational, before and after hospital relocation       | 44%  |

|                                          |                                                                   |     |
|------------------------------------------|-------------------------------------------------------------------|-----|
| Stevens et al 2014 <sup>123</sup>        | Prospective observational, before and after hospital relocation   | 56% |
| Stiller et al 2017 <sup>124</sup>        | Retrospective observational                                       | 59% |
| Swanson et al 2013 <sup>125</sup>        | Prospective observational, before and after hospital relocation   | 37% |
| Tandberg et al 2018 <sup>126</sup>       | Prospective observational                                         | 70% |
| Tandberg et al 2019 <sup>127</sup>       | Prospective case-control                                          | 67% |
| Tandberg et al 2019 <sup>128</sup>       | Prospective observational                                         | 67% |
| Taylor et al 2018 <sup>129</sup>         | SLR                                                               | 91% |
| Tegnstedt et al 2013 <sup>130</sup>      | Prospective observational                                         | 70% |
| Teltsch et al 2011 <sup>131</sup>        | Retrospective case-control, before and after hospital relocation  | 67% |
| Toivonen et al 2017 <sup>132</sup>       | Prospective case-control, before and after hospital relocation    | 63% |
| Vaisman et al 2018 <sup>133</sup>        | Retrospective case-control                                        | 67% |
| van de Glind et al 2008 <sup>134</sup>   | Prospective observational                                         | 74% |
| van der Hoeven et al 2022 <sup>135</sup> | Retrospective observational, before and after hospital relocation | 63% |
| Van Enk & Steinberg 2011 <sup>136</sup>  | Prospective observational, before and after hospital relocation   | 44% |
| van Veenendaal et al 2020 <sup>137</sup> | Retrospective observational, before and after hospital relocation | 70% |
| Van Veenendaal et al 2022 <sup>138</sup> | Prospective observational                                         | 70% |
| Vietri et al 2004 <sup>139</sup>         | Prospective case-control, before and after hospital relocation    | 59% |
| Vohr et al 2017 <sup>140</sup>           | Prospective observational, before and after hospital relocation   | 67% |
| Voigt et al 2018 <sup>141</sup>          | SLR                                                               | 86% |
| Walsh et al 2006 <sup>142</sup>          | Prospective observational, before and after hospital relocation   | 33% |
| Washam et al 2018 <sup>143</sup>         | Retrospective case-control                                        | 78% |
| Watson et al 2014 <sup>144</sup>         | Prospective observational, before and after hospital relocation   | 44% |
| Zaal et al 2013 <sup>145</sup>           | Prospective observational                                         | 67% |

Quality is graded by colour: green, good; orange, medium; red, poor. Abbreviation: SLR, systematic literature review.



**Table 2. Summary of studies reporting mortality data**

| Citation                                                    | QA  | Location       | Population      | Number of patients/hospitals                     | Patient type                 | Type of admission | Level of care | Data that favour single room | Data showing no difference                                                                         | Data that favour shared room |
|-------------------------------------------------------------|-----|----------------|-----------------|--------------------------------------------------|------------------------------|-------------------|---------------|------------------------------|----------------------------------------------------------------------------------------------------|------------------------------|
| <b>Before and after a hospital relocation</b>               |     |                |                 |                                                  |                              |                   |               |                              |                                                                                                    |                              |
| Cantoni 2009 <sup>16</sup>                                  | 67% | Switzerland    | Adults          | 227 patients, 1 hospital                         | Stem cell transplant         | Elective          | Routine       |                              | % deaths                                                                                           |                              |
| Davis 2019 <sup>25</sup>                                    | 67% | Australia      | Adults          | 1569 patients, 1 hospital                        | Orthopaedic                  | Elective          | Routine       |                              | $p=0.664$                                                                                          |                              |
| Domanico 2010, <sup>28</sup><br>Domanico 2011 <sup>29</sup> | 63% | United States  | Neonates        | 161 carers, 1 hospital, 2 units                  | Paediatric                   | NR                | NICU          | % deaths                     |                                                                                                    |                              |
| Jansen 2021 <sup>55</sup>                                   | 63% | Netherlands    | Neonates        | 712 patients, 1 hospital, 2 units                | Premature neonates           | Maternity care    | NICU          |                              | $p=0.38$ all-cause mortality<br>$p=0.96$ infection-related mortality                               |                              |
| Jongerden 2013 <sup>59</sup>                                | 67% | Netherlands    | Adults          | 323 patients, 1 hospital                         | Mixed, Adults                | Mixed             | ICU           |                              | $p=0.98$                                                                                           |                              |
| Jung 2022 <sup>62</sup>                                     | 67% | South Korea    | Adults          | 901 patients, 1 hospital                         | Mixed                        | Unclear           | ICU           |                              | $p=0.168$                                                                                          |                              |
| Lazar 2015 <sup>70</sup>                                    | 48% | Israel         | Children        | 4162 patients, 1 hospital                        | Children                     | Mixed             | PICU          |                              | $p=0.22$                                                                                           |                              |
| Puumala 2020 <sup>102</sup>                                 | 67% | United States  | Neonates        | 9995 patients, 1 hospital                        | Premature neonates           | Emergency         | NICU          |                              |                                                                                                    | % deaths                     |
| Singh 2015 <sup>116</sup>                                   | 70% | United Kingdom | Adults, Elderly | 1749 patients, 1 hospital                        | Internal medicine, Geriatric | Mixed             | Routine       |                              | $p=0.12$ one-year mortality<br>$p=0.35$ inpatient mortality<br>$p=0.29$ 30-day discharge mortality |                              |
| <b>Contemporaneous comparison</b>                           |     |                |                 |                                                  |                              |                   |               |                              |                                                                                                    |                              |
| Bracco 2007 <sup>13</sup>                                   | 74% | Canada         | Adults          | 2522 patients (of whom 207 known MRS carriers at | Mixed, Post surgery,         | Mixed             | ICU           | $p<0.001$                    |                                                                                                    |                              |



| Citation                    | QA  | Location       | Population   | Number of patients/hospitals      | Patient type               | Type of admission | Level of care | Data that favour single room                     | Data showing no difference                            | Data that favour shared room |
|-----------------------------|-----|----------------|--------------|-----------------------------------|----------------------------|-------------------|---------------|--------------------------------------------------|-------------------------------------------------------|------------------------------|
|                             |     |                |              | admission), 1 hospital, 1 ward    | Medical admission          |                   |               |                                                  |                                                       |                              |
| Caruso 2014 <sup>19</sup>   | 74% | Brazil         | Adults       | 1253 patients, 1 hospital         | Adults                     | Mixed             | ICU           |                                                  | p=0.18                                                |                              |
| Harris 2006 <sup>50</sup>   | 63% | United States  | Neonates     | 21 parents, 75 HCPs, 11 hospitals | Neonates                   | Emergency         | NICU          |                                                  |                                                       | % deaths                     |
| Hyun 2021 <sup>54</sup>     | 78% | South Korea    | Adults       | 666 patients, 1 hospital          | Respiratory, COVID-19      | Emergency         | ICU           |                                                  |                                                       | % deaths                     |
| Julian 2015 <sup>61</sup>   | 78% | United States  | Neonates     | 1823 patients 1 hospital, 1 unit  | Neonates                   | Mixed             | NICU          |                                                  | p=0.56 CLOS or mortality                              |                              |
| Knight 2016 <sup>66</sup>   | 59% | United Kingdom | Elderly      | 100 patients, 2 hospitals         | Geriatric, Dementia        | Mixed             | Routine       |                                                  | p>0.95 inpatient mortality<br>p=0.33 30-day mortality |                              |
| Lehtonen 2020 <sup>71</sup> | 74% | 10 countries   | Neonates     | 4662 patients, 331 units          | Neonates                   | Emergency         | ICU           | OR 0.76, 0.64-0.89, major morbidity or mortality | OR 0.85, 0.70-1.02, mortality only                    |                              |
| Zaal 2013 <sup>145</sup>    | 67% | Netherlands    | Older Adults | 156 patients 1 hospital           | Older Adults with dementia | Mixed             | ICU           |                                                  | p=0.72, % deaths                                      |                              |

**Table 3. Summary of studies reporting data on patient care and disease management**

| Citation                                                                      | QA  | Location       | Population      | Number of patients/<br>hospitals                                | Patient type                                 | Type of admission   | Level of care | Data that favour single room                                                                           | Data showing no difference                | Data that favour shared room                       |
|-------------------------------------------------------------------------------|-----|----------------|-----------------|-----------------------------------------------------------------|----------------------------------------------|---------------------|---------------|--------------------------------------------------------------------------------------------------------|-------------------------------------------|----------------------------------------------------|
| <b>Before and after a hospital relocation plus Contemporaneous comparison</b> |     |                |                 |                                                                 |                                              |                     |               |                                                                                                        |                                           |                                                    |
| Maben 2016 <sup>77</sup>                                                      | 67% | United Kingdom | Unclear         | 32 patients, 21 HCP, 1 hospital relocation, 2 control hospitals | Mixed                                        | Unclear             | Mixed         |                                                                                                        | Medication errors 9 months after the move | Fewer medication errors immediately after the move |
| <b>Before and after a hospital relocation</b>                                 |     |                |                 |                                                                 |                                              |                     |               |                                                                                                        |                                           |                                                    |
| Davis 2019 <sup>25</sup>                                                      | 67% | Australia      | Adults          | 1569 patients, 1 hospital relocation                            | Orthopaedic                                  | Elective            | Routine       | Lower % medical deterioration requiring rapid response or clinical review                              |                                           |                                                    |
| Lawson 2000 <sup>69</sup>                                                     | 41% | United Kingdom | Adults          | 424 patients, 2 hospitals, 4 wards relocation                   | Orthopaedic patients                         | Unclear             | Routine       | Lower use of painkillers<br>% responders<br>% verbal outbursts<br>% threatening behaviour              |                                           |                                                    |
| <b>Contemporaneous comparison</b>                                             |     |                |                 |                                                                 |                                              |                     |               |                                                                                                        |                                           |                                                    |
| Ehrlander 2009 <sup>35</sup>                                                  | 78% | United States  | Adults          | 117 patients, 1 hospital                                        | Mixed                                        | Unclear             | Routine       |                                                                                                        |                                           | Qualitative (feelings of safety)                   |
| McKeown 2015 <sup>81</sup>                                                    | 48% | Ireland        | Unclear         | 880 patients. 24 hospitals                                      | End of life                                  | Emergency, Elective | Routine       | Perceived acceptability of patient's death<br>Symptom management<br>Symptom experience<br>Patient care |                                           |                                                    |
| Nahas 2016 <sup>89</sup>                                                      | 56% | United Kingdom | Adults, Elderly | 60 patients, 2 hospitals                                        | Orthopaedic (elective hip/knee arthroplasty) | Elective            | Routine       | p=0.020, cleanliness<br>p=0.015, staff pain management                                                 | p=0.190, toileting help given             |                                                    |



1  
2  
3  
4  
5  
6  
7  
8  
9  
10  
11  
12  
13  
14  
15  
16  
17  
18  
19  
20  
21  
22  
23  
24  
25  
26  
27  
28  
29  
30  
31  
32  
33  
34  
35  
36  
37  
38  
39  
40  
41  
42  
43  
44  
45  
46  
47

| Citation                         | QA            | Location      | Population | Number of patients/<br>hospitals | Patient type     | Type of admission | Level of care | Data that favour single room                                                                                                                                                                                                   | Data showing no difference                                                                  | Data that favour shared room |
|----------------------------------|---------------|---------------|------------|----------------------------------|------------------|-------------------|---------------|--------------------------------------------------------------------------------------------------------------------------------------------------------------------------------------------------------------------------------|---------------------------------------------------------------------------------------------|------------------------------|
|                                  |               |               |            |                                  |                  |                   |               | p<0.001, pain control                                                                                                                                                                                                          |                                                                                             |                              |
| Van de Glind 2008 <sup>134</sup> | 74%           | Netherlands   | Adults     | 52 encounters, 1 hospital        | Urology          | Unclear           | Routine       | p=0.003, greater duration of physician-patient encounter<br>% encounter time patient speaks is greater<br>Patients disclose more emotional cues, and information cues<br>p=0.031, more physician responses to the patient cues | % encounter time physician speaks was no different<br>Patients disclose more emotional cues |                              |
| <b>Evidence synthesis</b>        |               |               |            |                                  |                  |                   |               |                                                                                                                                                                                                                                |                                                                                             |                              |
| Dowdeswell 2004 <sup>31</sup>    | SLR<br>36%    | International | Unclear    | Unclear                          | Mixed            | Mixed             | Mixed         | Hospital acquired infection treatment;<br>Hand-hygiene;<br>Cleaning and decontamination;<br>Recovery;<br>In situ medical treatment<br>Family involvement<br>Environment match the patient's progress                           |                                                                                             |                              |
| OECD WHO 2019 <sup>92</sup>      | Report<br>14% | Europe        | NR         | NR                               | Mixed            | Mixed             | Mixed         |                                                                                                                                                                                                                                | Pain scores                                                                                 |                              |
| Søndergaard 2022 <sup>118</sup>  | SLR<br>91%    | International | NR         | NR                               | Acute, Surgical, | Unclear           | Routine       | Sleep quality<br>Personal control<br>Environment                                                                                                                                                                               |                                                                                             |                              |

| Citation                   | QA         | Location      | Population | Number of patients/<br>hospitals | Patient type         | Type of<br>admission | Level of care | Data that favour<br>single room | Data showing no<br>difference  | Data that favour<br>shared room |
|----------------------------|------------|---------------|------------|----------------------------------|----------------------|----------------------|---------------|---------------------------------|--------------------------------|---------------------------------|
|                            |            |               |            |                                  | Internal<br>medicine |                      |               | Recovery time                   |                                |                                 |
| Taylor 2018 <sup>129</sup> | SLR<br>91% | International | NR         | NR                               | Mixed                | Mixed                | Mixed         |                                 |                                | Restraint use e.g.,<br>rails    |
| Voigt 2018 <sup>141</sup>  | SLR<br>86% | International | NR         | NR                               | NR                   | Unclear              | Routine       |                                 | Medication errors<br>and usage |                                 |

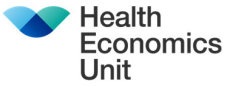

Table 4. Summary of studies reporting data on maternity and neonatal care

| Citation                                      | QA  | Location      | Population | Number of patients/hospitals                                  | Patient type | Type of admission | Level of care | Data that favour single room                                                                                                                                                                                                                                                                                                                | Data showing no difference                                                                                                                                                                                                                                                                   | Data that favour shared room |
|-----------------------------------------------|-----|---------------|------------|---------------------------------------------------------------|--------------|-------------------|---------------|---------------------------------------------------------------------------------------------------------------------------------------------------------------------------------------------------------------------------------------------------------------------------------------------------------------------------------------------|----------------------------------------------------------------------------------------------------------------------------------------------------------------------------------------------------------------------------------------------------------------------------------------------|------------------------------|
| <b>Before and after a hospital relocation</b> |     |               |            |                                                               |              |                   |               |                                                                                                                                                                                                                                                                                                                                             |                                                                                                                                                                                                                                                                                              |                              |
| Campbell-Yeo 2021 <sup>15</sup>               | 74% | Canada        | Neonates   | 71 mothers, 2 wards                                           | Neonates     | Emergency         | ICU           | Parental presence and involvement (mother and partner feeding)                                                                                                                                                                                                                                                                              |                                                                                                                                                                                                                                                                                              |                              |
| Carter 2008 <sup>18</sup>                     | 33% | United States | Adults     | 1 hospital 53 parents                                         | Neonates     | Emergency         | ICU           | All p's<0.05 parent perceptions of access to staff                                                                                                                                                                                                                                                                                          |                                                                                                                                                                                                                                                                                              |                              |
| Domanico 2011 <sup>29</sup>                   | 63% | United States | Neonates   | 162 patients (PEMRs 2/3=150, PEMRs 4=12), 1 hospital, 2 units | Paediatric   | NR                | NICU          | PEMR 2-3: patient progress: p<0.001, total apnoea events p<0.001, apnoea events/day p=0.031, days on mother's breastmilk; p=0.001, days on mother's breastmilk per LOS; p=0.003, interval to enteral feeding; p<0.001, interval to breastmilk feeding; p=0.048, days on parenteral nutrition; p=0.004, days on parenteral nutrition per LOS | PEMR 2-3 p=0.94, gestational age p=0.92, admission weight p=NS, acuity p=0.45, weight gain p=0.17, length gain p=0.17, head circumference gain p=0.84, total CPAP days p=0.7, CPAP days/LOS p=0.17, total caffeine days p=0.11, total caffeine days/LOS p=0.765, interval to formula feeding | PEMR 4:                      |



1  
2  
3  
4  
5  
6  
7  
8  
9  
10  
11  
12  
13  
14  
15  
16  
17  
18  
19  
20  
21  
22  
23  
24  
25  
26  
27  
28  
29  
30  
31  
32  
33  
34  
35  
36  
37  
38  
39  
40  
41  
42  
43  
44  
45  
46  
47

| Citation | QA | Location | Population | Number of patients/hospitals | Patient type | Type of admission | Level of care | Data that favour single room | Data showing no difference                                                                                                                                                                                                                                                                                                                                                                                                                                                                                                                                                                                                                                                                                                                                                                                                                                        | Data that favour shared room |
|----------|----|----------|------------|------------------------------|--------------|-------------------|---------------|------------------------------|-------------------------------------------------------------------------------------------------------------------------------------------------------------------------------------------------------------------------------------------------------------------------------------------------------------------------------------------------------------------------------------------------------------------------------------------------------------------------------------------------------------------------------------------------------------------------------------------------------------------------------------------------------------------------------------------------------------------------------------------------------------------------------------------------------------------------------------------------------------------|------------------------------|
|          |    |          |            |                              |              |                   |               |                              | <p>p=0.47, gestational age<br/>                     p=0.49, admission weight<br/>                     p=NS, acuity<br/>                     p=0.76, weight gain<br/>                     p=0.47, length gain<br/>                     p=0.70, head circumference gain<br/>                     p=0.59, total CPAP days<br/>                     p=0.94, CPAP days/LOS<br/>                     p=0.82, total caffeine days<br/>                     p=0.94, total caffeine days/LOS<br/>                     p=0.70, total apnoea events<br/>                     p=0.18, apnoea events/day<br/>                     p=0.937, interval to enteral feeding<br/>                     p=0.571, interval to formula feeding<br/>                     p=0.818, days on parenteral nutrition<br/>                     p=0.937, days on parenteral nutrition per LOS</p> |                              |

For peer review only

| Citation                    | QA  | Location      | Population | Number of patients/hospitals                  | Patient type     | Type of admission | Level of care | Data that favour single room                                                                                       | Data showing no difference                                                                                                                           | Data that favour shared room                             |
|-----------------------------|-----|---------------|------------|-----------------------------------------------|------------------|-------------------|---------------|--------------------------------------------------------------------------------------------------------------------|------------------------------------------------------------------------------------------------------------------------------------------------------|----------------------------------------------------------|
| Dowling 2012 <sup>32</sup>  | 63% | United States | Neonates   | 40 mothers, 1 hospital                        | Neonates         | Emergency         | ICU           |                                                                                                                    | p=NS., all breastfeeding measures                                                                                                                    |                                                          |
| Erickson 2011 <sup>38</sup> | 67% | United States | Neonates   | 73 patients, 1 hospital                       | Preterm neonates | Emergency         | NICU          | p=0.04, time to enteral nutrition                                                                                  | p=0.05, weight gain/day<br>p=0.30, weight gain/day normalized to kg birth weight<br>p=0.47, time to parenteral nutrition                             |                                                          |
| Harris 2004 <sup>49</sup>   | 74% | Canada        | Adults     | 976 patients, 1 new hospital unit established | Pregnant women   | Maternity         | Routine       | p=0.04, continuous or intermittent electronic foetal monitoring<br>p=0.03, IV therapy<br>p=0.01, 1-minute Apgar <7 | p=NS for augmentation of labour, 20-minutes initial electronic foetal monitoring at admission, epidural, narcotics, mode of delivery, and episiotomy |                                                          |
| Hourigan 2018 <sup>53</sup> | 63% | United States | Neonates   | 32 patients, 1 hospital                       | Neonates         | Emergency         | ICU           |                                                                                                                    | p=0.30, receiving some maternal or donor breastmilk                                                                                                  | p=0.04, primarily receiving maternal or donor breastmilk |
| Janssen 2000 <sup>56</sup>  | 56% | Canada        | Adults     | 426 patients, 1 hospital relocation           | Pregnant women   | Maternity         | Routine       | p<0.001, patient satisfaction with amount of nurse interaction for physical, emotional, and                        | p=0.10, baby received supplementation with water<br>p=0.25, p=0.05 clear discharge instructions of                                                   |                                                          |





1  
2  
3  
4  
5  
6  
7  
8  
9  
10  
11  
12  
13  
14  
15  
16  
17  
18  
19  
20  
21  
22  
23  
24  
25  
26  
27  
28  
29  
30  
31  
32  
33  
34  
35  
36  
37  
38  
39  
40  
41  
42  
43  
44  
45  
46  
47

| Citation | QA | Location | Population | Number of patients/hospitals | Patient type | Type of admission | Level of care | Data that favour single room                                                                                                                                                                                                                                                                                                                                                                                                                                                                           | Data showing no difference                                            | Data that favour shared room |
|----------|----|----------|------------|------------------------------|--------------|-------------------|---------------|--------------------------------------------------------------------------------------------------------------------------------------------------------------------------------------------------------------------------------------------------------------------------------------------------------------------------------------------------------------------------------------------------------------------------------------------------------------------------------------------------------|-----------------------------------------------------------------------|------------------------------|
|          |    |          |            |                              |              |                   |               | spiritual needs, in labour, and postpartum p<0.001, patient satisfaction with nurse response time, teaching time, information received, feeding related teaching p<0.001, number of babies who received supplementation with formula p<0.001, number breastfeeding p=0.044, number breastfed within 1-2 hours post-delivery p=0.01, clear discharge instructions of when expect a call from the community health nurse p<0.001, clear instructions of how to use car seat, and nurse reviewed handouts | when to call the doctor, and when to make an appointment respectively |                              |

For peer review only

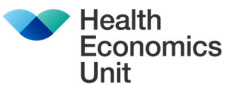

| Citation                    | QA  | Location      | Population             | Number of patients/hospitals                                           | Patient type   | Type of admission | Level of care | Data that favour single room                                                                                                                                         | Data showing no difference                                                                                                                                                | Data that favour shared room      |
|-----------------------------|-----|---------------|------------------------|------------------------------------------------------------------------|----------------|-------------------|---------------|----------------------------------------------------------------------------------------------------------------------------------------------------------------------|---------------------------------------------------------------------------------------------------------------------------------------------------------------------------|-----------------------------------|
| Lester 2014 <sup>72</sup>   | 63% | United States | Neonates               | 403 patients, 1 hospital relocation                                    | Neonates       | Emergency         | ICU           | Narrative - reduced stress<br><br>p<0.0001, reduced pain                                                                                                             |                                                                                                                                                                           |                                   |
| Puumala 2020 <sup>102</sup> | 67% | United States | Neonates               | 9995 patients, 1 hospital                                              | Neonates       | Emergency         | ICU           | p<0.001, interval to oral feeding                                                                                                                                    |                                                                                                                                                                           |                                   |
| Olson 1992 <sup>93</sup>    | 52% | United States | Adults                 | 351 patients, 28 HCP, 1 hospital                                       | Pregnant women | Maternity         | Routine       | p<0.05, nurse preferred single rooms<br><br>p<0.01, nurse think single room is better for premature neonates                                                         | p>0.05, nurses think open rooms are better for ventilated/critically ill infant                                                                                           |                                   |
| Stevens 2012 <sup>122</sup> | 44% | United States | Neonates               | 73 patients, 1 hospital relocation                                     | Neonates       | Emergency         | ICU           | p=0.04, interval to enteric nutrition                                                                                                                                | p=NS., other nutrition parameters                                                                                                                                         |                                   |
| Swanson 2013 <sup>125</sup> | 37% | United States | Neonates, Carers, HCPs | 55 parent surveys, 42 AP surveys, 151 NN surveys 1 hospital relocation | Neonates       | Emergency         | NICU          | p<0.05, Advanced neonatal practitioner perceptions of development, facility and privacy<br>p<0.05, Neonatal nurses perceptions of development, facility and privacy. | Advanced neonatal practitioners: p=NS., teamwork, communication, safety<br><br>Neonatal nurses: p=NS., communication, safety<br><br>Parents: p=NS, development and safety | Neonatal nurses: p<0.05, teamwork |

| Citation                           | QA  | Location    | Population       | Number of patients/hospitals                  | Patient type       | Type of admission | Level of care | Data that favour single room                                                                           | Data showing no difference                                                                                                                                                                     | Data that favour shared room                                                                    |
|------------------------------------|-----|-------------|------------------|-----------------------------------------------|--------------------|-------------------|---------------|--------------------------------------------------------------------------------------------------------|------------------------------------------------------------------------------------------------------------------------------------------------------------------------------------------------|-------------------------------------------------------------------------------------------------|
| Toivonen 2017 <sup>132</sup>       | 63% | Finland     | Neonates         | 20 nurses, 1 hospital relocation              | Neonates           | Emergency         | ICU           | p=0.001, duration of nurse-parent interactions<br>p<0.0001, duration of nurse-family interactions      | p=0.349, number of nurse-parent interactions<br>p=0.471, number of nurse-infant interactions<br>p=0.073, duration of nurse-infant interactions<br>p=0.488, number of nurse-family interactions |                                                                                                 |
| Van der Hoeven 2022 <sup>135</sup> | 63% | Netherlands | Infants          | 1293 infants, 1 hospital                      | Infants            | Unclear           | ICU           | p<0.001, weight at discharge<br>p=0.003, rate of weight gain                                           | p=0.13, gestational age at full enteral feeding                                                                                                                                                |                                                                                                 |
| Contemporaneous comparison         |     |             |                  |                                               |                    |                   |               |                                                                                                        |                                                                                                                                                                                                |                                                                                                 |
| Bodack 2016 <sup>10</sup>          | 55% | Germany     | Neonates         | 35 sets of parents                            | Premature neonates | Maternity care    | NICU          | Qualitative (quality of care)                                                                          | Qualitative (communication)                                                                                                                                                                    |                                                                                                 |
| Erdeve 2008 <sup>36</sup>          | 74% | Turkey      | Adults, Neonates | 60 infants, 49 mothers, 1 hospital            | Preterm neonates   | Emergency         | NICU          |                                                                                                        | p=0.084, Routine visits<br>p=0.046, acute care visits<br>p=0.154, number of breastfed infants                                                                                                  | p=0.005, more total applications to health services<br><br>p=0.001, more consultations by phone |
| Grundt 2021 <sup>47</sup>          | 67% | Norway      | Neonates         | 77 patients, 66 mothers, 2 hospitals, 2 units | Premature neonates | Maternity         | NICU          | p=0.08, p=0.06, volume breastmilk produced 7, 14, days post-delivery, respectively<br>p<0.001, p=0.02, | p=0.71, number of sessions at the breast<br>p=0.46, mother breastfeeding self-efficacy<br>p=0.51, p=0.33,                                                                                      |                                                                                                 |



| Citation                      | QA   | Location      | Population | Number of patients/hospitals | Patient type       | Type of admission | Level of care | Data that favour single room                                                                                                                                                                                                                                 | Data showing no difference                                                                                                                                                                                     | Data that favour shared room     |
|-------------------------------|------|---------------|------------|------------------------------|--------------------|-------------------|---------------|--------------------------------------------------------------------------------------------------------------------------------------------------------------------------------------------------------------------------------------------------------------|----------------------------------------------------------------------------------------------------------------------------------------------------------------------------------------------------------------|----------------------------------|
|                               |      |               |            |                              |                    |                   |               | infants breastfed directly and exclusively at discharge, at term, respectively $p < 0.001$ , $p = 0.003$ , $p = 0.00$ , infants partly directly breastfed at discharge, at term, and 4 months corrected age, respectively $p = 0.00^a$ use of nipple shields | infants exclusively directly breastfed, or on solids, at 4 months corrected age, respectively $p = 0.33$ , $p = 0.61$ , use of nipple shields adjusted for post-menstrual age 33 weeks, 34 weeks, respectively |                                  |
| Lester 2014 <sup>72</sup>     | 63%  | United States | Neonates   | 403 patients, 1 hospital     | Neonates           | Emergency         | ICU           | $p = 0.005$ , weight at discharge $p = 0.017$ , rate of weight gain $p = 0.015$ , interval to full enteral feeding                                                                                                                                           |                                                                                                                                                                                                                |                                  |
| Pineda 2012 <sup>100</sup>    | 70%  | United States | Neonates   | 81 patients, 1 hospital      | Premature neonates | Emergency         | NICU          |                                                                                                                                                                                                                                                              | $p = 0.75$ , breastmilk feeding at discharge                                                                                                                                                                   |                                  |
| Stelwagen 2021 <sup>120</sup> | 100% | Netherlands   | Adults     | 1 hospital<br>36 parents     | Neonates           | Emergency         | ICU           | Narrative - apnoea and periodic breathing                                                                                                                                                                                                                    |                                                                                                                                                                                                                |                                  |
| Tandberg 2019 <sup>128</sup>  | 67%  | Norway        | Neonates   | 77 patients, 2 hospitals     | Neonates           | Emergency         | ICU           | Greater birth weight, length, and head circumference                                                                                                                                                                                                         | $p = 0.45$ , $p = 0.42$ , breastmilk feeding exclusively at discharge, and term +4 months                                                                                                                      | Greater weight at term +4 months |

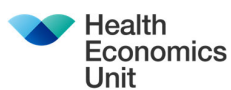

| Citation                 | QA  | Location      | Population | Number of patients/hospitals        | Patient type | Type of admission | Level of care | Data that favour single room                                                                                                                                                             | Data showing no difference | Data that favour shared room     |
|--------------------------|-----|---------------|------------|-------------------------------------|--------------|-------------------|---------------|------------------------------------------------------------------------------------------------------------------------------------------------------------------------------------------|----------------------------|----------------------------------|
|                          |     |               |            |                                     |              |                   |               |                                                                                                                                                                                          |                            | greater length at term +4 months |
| Vohr 2017 <sup>140</sup> | 67% | United States | Neonates   | 651 patients, 1 hospital relocation | Neonates     | Emergency         | NICU          | $p < 0.001$ , weight gain per day<br>$p < 0.001$ , weight gain at discharge<br>$p = 0.002$ , human milk at 1 week<br>$p = 0.001$ , human milk at 4 weeks<br>$p < 0.001$ , volume of milk |                            |                                  |

For peer review only

**Table 5. Summary of studies reporting data on complications of disease**

| Citation                                                                      | QA  | Location       | Population      | Number of patients/hospitals                                    | Patient type         | Type of admission | Level of care | Data that favour single room                                                                                                                                   | Data showing no difference                                                                                   | Data that favour shared room                                                                                                                                       |
|-------------------------------------------------------------------------------|-----|----------------|-----------------|-----------------------------------------------------------------|----------------------|-------------------|---------------|----------------------------------------------------------------------------------------------------------------------------------------------------------------|--------------------------------------------------------------------------------------------------------------|--------------------------------------------------------------------------------------------------------------------------------------------------------------------|
| <b>Before and after a hospital relocation plus Contemporaneous comparison</b> |     |                |                 |                                                                 |                      |                   |               |                                                                                                                                                                |                                                                                                              |                                                                                                                                                                    |
| Maben 2016 <sup>77</sup>                                                      | 67% | United Kingdom | Unclear         | 32 patients, 21 HCP, 1 hospital relocation, 2 control hospitals | Mixed                | Unclear           | Mixed         |                                                                                                                                                                |                                                                                                              | Pressure ulcers per 1,000 patient-days                                                                                                                             |
| <b>Before and after a hospital relocation</b>                                 |     |                |                 |                                                                 |                      |                   |               |                                                                                                                                                                |                                                                                                              |                                                                                                                                                                    |
| Blandfort 2019 <sup>7</sup>                                                   | 67% | Denmark        | Adults, Elderly | 1014 patients, 2 hospitals                                      | Geriatric, Dementia  | Elective          | Routine       | p=0.02, incidence of delirium                                                                                                                                  | p=0.57, duration of first episode of delirium                                                                |                                                                                                                                                                    |
| Cantoni 2009 <sup>16</sup>                                                    | 67% | Switzerland    | Adults          | 227 patients, 1 hospital                                        | Stem cell transplant | Elective          | Routine       | Number of patients with infections (total, pneumonia, CMV-reactivation, CMV-primary, invasive mould, other)<br>Infection rates (pneumonia: clinical diagnosis) |                                                                                                              | Number of patients with infections (microbiologically documented, primary sepsis)<br><br>Infection rates (sepsis, pneumonia, pneumonia: microbiological diagnosis) |
| Davis 2019 <sup>25</sup>                                                      | 67% | Australia      | Adults          | 1569 patients, 1 hospital relocation                            | Orthopaedic          | Elective          | Routine       |                                                                                                                                                                | p=0.243, hospital-acquired pressure injuries                                                                 |                                                                                                                                                                    |
| Harris 2004 <sup>49</sup>                                                     | 74% | Canada         | Adults          | 976 patients, 1 new hospital unit established                   | Pregnant women       | Maternity         | Routine       |                                                                                                                                                                | p=NS for rates of postpartum haemorrhage, pyrexia, rates of thick meconium, and cases of meconium aspiration |                                                                                                                                                                    |

| Citation                    | QA  | Location       | Population      | Number of patients/hospitals         | Patient type                 | Type of admission | Level of care | Data that favour single room                                                                                                                                                                                                                   | Data showing no difference                                                                                                                | Data that favour shared room                                                      |
|-----------------------------|-----|----------------|-----------------|--------------------------------------|------------------------------|-------------------|---------------|------------------------------------------------------------------------------------------------------------------------------------------------------------------------------------------------------------------------------------------------|-------------------------------------------------------------------------------------------------------------------------------------------|-----------------------------------------------------------------------------------|
| Lester 2014 <sup>72</sup>   | 63% | United States  | Neonates        | 403 patients, 1 hospital relocation  | Neonates                     | Emergency         | ICU           | Less stress (some related to increased maternal involvement) p<0.0001, maternal involvement related to lower pain scores p<0.0001, increased maternal involvement in care of the neonate p<0.0001, reduction in pain due to the SFR NICU alone |                                                                                                                                           |                                                                                   |
| Singh 2015 <sup>116</sup>   | 70% | United Kingdom | Adults, Elderly | 1749 patients, 1 hospital relocation | Internal medicine, Geriatric | Mixed             | Routine       |                                                                                                                                                                                                                                                |                                                                                                                                           | p<0.01, hip fractures due to falls                                                |
| Stevens 2012 <sup>122</sup> | 44% | United States  | Neonates        | 73 patients, 1 hospital relocation   | Neonates                     | Emergency         | ICU           |                                                                                                                                                                                                                                                | OR 1.267, 0.929-1.730, serious adverse outcomes                                                                                           |                                                                                   |
| Lester 2016 <sup>73</sup>   | 59% | United States  | Neonates        | 216 patients, 1 hospital relocation  | Premature neonates           | Maternity         | ICU           |                                                                                                                                                                                                                                                | p=0.90, periventricular leukomalacia p=0.80, retinopathy of prematurity (stage 3, 4, 5) p=0.16, sepsis p=0.13, bronchopulmonary dysplasia | p=0.09, necrotising enterocolitis p=0.08, intraventricular haemorrhage (grade3/4) |
| Monson 2018 <sup>86</sup>   | 78% | United States  | Neonates        | 90 preterm infants, 15 term-         | Preterm neonates             | Emergency         | NICU          |                                                                                                                                                                                                                                                | p=0.35, bronchopulmonary dysplasia                                                                                                        |                                                                                   |

| Citation                                                | QA  | Location  | Population       | Number of patients/<br>hospitals                                                 | Patient type                           | Type of admission | Level of care | Data that favour single room                                                               | Data showing no difference                                                                                                          | Data that favour shared room |
|---------------------------------------------------------|-----|-----------|------------------|----------------------------------------------------------------------------------|----------------------------------------|-------------------|---------------|--------------------------------------------------------------------------------------------|-------------------------------------------------------------------------------------------------------------------------------------|------------------------------|
|                                                         |     |           |                  | born control infants, 1 hospital                                                 |                                        |                   |               |                                                                                            | p=0.38, infection                                                                                                                   |                              |
| <b>Contemporaneous comparison</b>                       |     |           |                  |                                                                                  |                                        |                   |               |                                                                                            |                                                                                                                                     |                              |
| Bracco 2007 <sup>13</sup>                               | 74% | Canada    | Adults           | 2522 patients (of whom 207 known MRSA carriers at admission), 1 hospital, 1 ward | Mixed, Post surgery, Medical admission | Mixed             | ICU           | Organ failure                                                                              |                                                                                                                                     |                              |
| Caruso 2014 <sup>19</sup>                               | 74% | Brazil    | Adults           | 1253 patients, 1 hospital                                                        | Adults                                 | Mixed             | ICU           | p<0.01 delirium prevalence<br>p<0.01 medical admissions<br>p<0.01 postoperative admissions | p=0.33 number of days with delirium                                                                                                 |                              |
| Erdeve 2008, <sup>36</sup><br>Erdeve 2009 <sup>37</sup> | 74% | Turkey    | Adults, Neonates | 60 infants, 49 mothers, 1 hospital                                               | Preterm neonates                       | Emergency         | NICU          |                                                                                            | p=0.720 clinical risk index for babies<br>p=0.673 neonatal therapeutic intensity scoring system                                     |                              |
| Felice Tong 2018 <sup>40</sup>                          | 78% | Australia | Adults           | 185 patients, 1 hospital                                                         | Orthopaedic                            | Elective          | Routine       |                                                                                            | p=0.70 thromboembolic events within 30-days<br>p=0.21 superficial wound infection within 30-days<br>Deep wound infections<br>p=0.70 |                              |



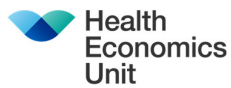

| Citation                    | QA  | Location                                                                                  | Population | Number of patients/hospitals        | Patient type        | Type of admission | Level of care | Data that favour single room                                                                                                                                                     | Data showing no difference                                                                                                                                                                                                                                                                  | Data that favour shared room                                             |
|-----------------------------|-----|-------------------------------------------------------------------------------------------|------------|-------------------------------------|---------------------|-------------------|---------------|----------------------------------------------------------------------------------------------------------------------------------------------------------------------------------|---------------------------------------------------------------------------------------------------------------------------------------------------------------------------------------------------------------------------------------------------------------------------------------------|--------------------------------------------------------------------------|
|                             |     |                                                                                           |            |                                     |                     |                   |               |                                                                                                                                                                                  | medical complications within 30-days                                                                                                                                                                                                                                                        |                                                                          |
| Knight 2016 <sup>66</sup>   | 59% | United Kingdom                                                                            | Elderly    | 100 patients, 2 hospitals           | Geriatric, Dementia | Mixed             | Routine       |                                                                                                                                                                                  | $p > 0.95$ , patients with hip fracture as result of inpatient fall                                                                                                                                                                                                                         |                                                                          |
| Lehtonen 2020 <sup>71</sup> | 74% | Canada, Australia, New Zealand, Finland, Israel, Japan, Spain, Sweden, Switzerland, Italy | Neonates   | 4662 patients, 331 units            | Preterm neonates    | Emergency         | ICU           | OR 0.76, 0.64-0.89, death or any major morbidity                                                                                                                                 | OR 0.95, 0.84-1.08, composite of mortality or any morbidity<br>OR 0.84, 0.71-1.00, sepsis<br>OR 1.10, 0.95-1.27, Broncho-pulmonary dysplasia<br>OR 1.14, 0.95-1.37, Intraventricular haemorrhage / Periventricular leukomalacia<br>OR 0.81, 0.66-0.99, Retinopathy of prematurity treatment |                                                                          |
| Vohr 2017 <sup>140</sup>    | 67% | United States                                                                             | Neonates   | 651 patients, 1 hospital relocation | Neonates            | Emergency         | NICU          | Bayley composites:<br>$p=0.02$ Cognitive<br>$p=0.04$ Language<br>$p=0.006$ Expressive communication<br>$p=0.08$ Motor<br>$p=0.04$ Fine motor<br><br>Bayley III composite scores: | Bayley composites:<br>$p=0.14$ receptive communication<br>$p=0.67$ gross motor<br>$p=0.11$ normal neurologic examination                                                                                                                                                                    | Suspicious neurological examination<br>Abnormal neurological examination |



| Citation                                                        | QA         | Location       | Population   | Number of patients/hospitals | Patient type               | Type of admission | Level of care | Data that favour single room                           | Data showing no difference     | Data that favour shared room |
|-----------------------------------------------------------------|------------|----------------|--------------|------------------------------|----------------------------|-------------------|---------------|--------------------------------------------------------|--------------------------------|------------------------------|
|                                                                 |            |                |              |                              |                            |                   |               | p=0.05, cognitive<br>p=0.02, language<br>p=0.07, motor |                                |                              |
| Lester 2014 <sup>72</sup>                                       | 63%        | United States  | Neonates     | 403 patients, 1 hospital     | Neonates                   | Emergency         | ICU           | p=0.05, sepsis                                         |                                |                              |
| Zaal 2013 <sup>145</sup>                                        | 67%        | Netherlands    | Older Adults | 156 patients 1 hospital      | Older Adults with dementia | Mixed             | ICU           |                                                        | p=0.53, crude risk of delirium |                              |
| <b>Evidence synthesis</b>                                       |            |                |              |                              |                            |                   |               |                                                        |                                |                              |
| OECD WHO 2019 <sup>92</sup>                                     | Report 14% | Europe         | NR           | NR                           | Mixed                      | Mixed             | Mixed         | p<0.05<br>Reduced medical errors                       |                                |                              |
| Scottish Intercollegiate Guidelines Network 2019 <sup>115</sup> | Report 73% | United Kingdom | Adults       | NR                           | At risk for delirium       | NR                | Routine       | Managing patients with delirium                        |                                |                              |
| Taylor 2018 <sup>129</sup>                                      | SLR 91%    | International  | NR           | NR                           | Mixed                      | Mixed             | Mixed         | ICU delirium                                           |                                |                              |

**Table 6. Summary of studies reporting data on prevention of infection**

| Citation                                                                      | QA  | Location       | Population | Number of patients/hospitals                                    | Patient type | Type of admission | Level of care | Data that favour single room                                                                                                                                                                                                    | Data showing no difference                                                               | Data that favour shared room                                                                  |
|-------------------------------------------------------------------------------|-----|----------------|------------|-----------------------------------------------------------------|--------------|-------------------|---------------|---------------------------------------------------------------------------------------------------------------------------------------------------------------------------------------------------------------------------------|------------------------------------------------------------------------------------------|-----------------------------------------------------------------------------------------------|
| <b>Before and after a hospital relocation plus Contemporaneous comparison</b> |     |                |            |                                                                 |              |                   |               |                                                                                                                                                                                                                                 |                                                                                          |                                                                                               |
| Maben 2016 <sup>77</sup>                                                      | 67% | United Kingdom | Unclear    | 32 patients, 21 HCP, 1 hospital relocation, 2 control hospitals | Mixed        | Unclear           | Mixed         | <i>Clostridium difficile</i> in older people's ward (Control new-build hospital)                                                                                                                                                |                                                                                          | <i>Clostridium difficile</i> in older people's ward (Study hospital)                          |
| <b>Before and after a hospital relocation</b>                                 |     |                |            |                                                                 |              |                   |               |                                                                                                                                                                                                                                 |                                                                                          |                                                                                               |
| Bonizzoli 2011 <sup>11</sup>                                                  | 30% | Italy          | Unclear    | 818 patients, 1 unit                                            | Trauma       | Unclear           | ICU           | Isolates of MRSA, <i>Proteus mirabilis</i> , <i>Escherichia coli</i> , <i>Serratia marcescens</i> , and <i>Enterobacter</i> spp<br>p<0.01, amoxicillin/clavulanate use, ceftriaxone use<br>p<0.05 oxacillin use, vancomycin use |                                                                                          |                                                                                               |
| Darley 2018 <sup>24</sup>                                                     | 56% | United Kingdom | Unclear    | 1 hospital relocation                                           | Unclear      | Unclear           | Routine       | p=0.04, <i>Escherichia coli</i> bacteraemia<br>p=0.01, hospital-acquired <i>Clostridium difficile</i> infection                                                                                                                 | p=0.22, hospital acquired methicillin-sensitive <i>Staphylococcus aureus</i> bacteraemia |                                                                                               |
| Domanico 2011 <sup>29</sup>                                                   | 63% | United States  | Neonates   | 162 patients (PEMRs 2/3=150, PEMRs 4=12), 1 hospital, 2 units   | Paediatric   | NR                | NICU          | Incidence of nosocomial sepsis ( <i>Candida albicans</i> , CONS, <i>Enterococcus</i>                                                                                                                                            | Incidence of nosocomial sepsis ( <i>Escherichia coli</i> )                               | Incidence of nosocomial sepsis ( <i>Enterobacter cloacae</i> , <i>Klebsiella pneumoniae</i> ) |

| Citation                     | QA   | Location    | Population | Number of patients/hospitals                                                                                                         | Patient type | Type of admission | Level of care | Data that favour single room                                                                                                                                  | Data showing no difference                                                                                             | Data that favour shared room |
|------------------------------|------|-------------|------------|--------------------------------------------------------------------------------------------------------------------------------------|--------------|-------------------|---------------|---------------------------------------------------------------------------------------------------------------------------------------------------------------|------------------------------------------------------------------------------------------------------------------------|------------------------------|
|                              |      |             |            |                                                                                                                                      |              |                   |               | <i>faecalis</i> , MRSA, <i>Staphylococcus aureus</i> , total)                                                                                                 |                                                                                                                        |                              |
| Davis 2019 <sup>25</sup>     | 67%  | Australia   | Adults     | 1569 patients, 1 hospital relocation                                                                                                 | Orthopaedic  | Elective          | Routine       |                                                                                                                                                               | p=0.251, hospital acquired MRSA infections<br>p=0.865, MRSA present on admission                                       |                              |
| Ferri 2015 <sup>41</sup>     | 100% | Canada      | Adults     | 39 HCPS, of which 13 nurses, 7 respiratory therapists, 5 HCPS (other), 6 physicians, 4 family members<br>4 support staff, 1 hospital | Unclear      | Unclear           | ICU           | Patient perception (6 patients perceived better infection prevention)                                                                                         |                                                                                                                        |                              |
| Gregersen 2021 <sup>46</sup> | 70%  | Denmark     | Elderly    | 446 patients, 1 hospital relocation                                                                                                  | Geriatric    | Unclear           | Routine       | % hospital-acquired infections<br>p=0.01, p=0.03 <sup>a</sup><br>time from admission to first hospital-acquired infection<br>p=0.004 urinary tract infections | p=0.74, pneumonia<br>p=0.50, gastritis<br>p=0.09, sepsis<br>p=0.22, other (wound infection, nephritis, and erysipelas) |                              |
| Halaby 2017 <sup>48</sup>    | 48%  | Netherlands | Unclear    | 16 beds, 1 hospital                                                                                                                  | Unclear      | Unclear           | ICU           | p=0.001, transmission of any Multidrug resistant bacteria<br>p=0.0015,                                                                                        | p=0.37 transmission of <i>Morganella</i> spp                                                                           |                              |



| Citation                    | QA  | Location      | Population | Number of patients/hospitals     | Patient type       | Type of admission | Level of care | Data that favour single room                                                                                                                                             | Data showing no difference                                                                                                                                                                 | Data that favour shared room |
|-----------------------------|-----|---------------|------------|----------------------------------|--------------------|-------------------|---------------|--------------------------------------------------------------------------------------------------------------------------------------------------------------------------|--------------------------------------------------------------------------------------------------------------------------------------------------------------------------------------------|------------------------------|
|                             |     |               |            |                                  |                    |                   |               | transmission of <i>Citrobacter</i> spp<br>p=0.0005<br>transmission of <i>Enterobacter</i> spp                                                                            | p=0.99, transmission of <i>Proteus</i> spp<br>p=0.25, transmission of <i>Serratia</i> spp<br>p=0.39, transmission of <i>Pseudomonas</i> spp                                                |                              |
| Hourigan 2018 <sup>53</sup> | 63% | United States | Neonates   | 32 patients, 1 hospital          | Premature neonates | Emergency         | NICU          | p=0.0001, fewer positive skin swabs<br>p=0.0003, fewer positive environmental swab samples<br>Presence of antibiotic resistance genes (including resistome and virulome) | p=NS<br>comparison of the entire bacterial community at the genus level<br>Potential human pathogenic viruses in 2-week stool, discharge stool and skin samples<br>Species alpha diversity |                              |
| Jansen 2021 <sup>55</sup>   | 63% | Netherlands   | Neonates   | 712 patients 1 hospital, 2 units | Premature neonates | Maternity care    | NICU          |                                                                                                                                                                          | p=0.62, incidence density per 1000 patient-days<br>p=0.59, cumulative incidence per 100 infants<br>p=0.66, skin and/or soft tissue infection<br>p=0.15, conjunctivitis                     |                              |
| Jung 2022 <sup>62</sup>     | 67% | South Korea   | Adults     | 901 patients, 1 hospital         | Mixed              | Unclear           | ICU           | p<0.001 <sup>a</sup> , CRAB acquisition                                                                                                                                  |                                                                                                                                                                                            |                              |

| Citation                    | QA  | Location      | Population | Number of patients/hospitals | Patient type       | Type of admission | Level of care | Data that favour single room                                                                                                                                                                                                                                                                 | Data showing no difference                                                                                             | Data that favour shared room                                                                                                                                                                                                                            |
|-----------------------------|-----|---------------|------------|------------------------------|--------------------|-------------------|---------------|----------------------------------------------------------------------------------------------------------------------------------------------------------------------------------------------------------------------------------------------------------------------------------------------|------------------------------------------------------------------------------------------------------------------------|---------------------------------------------------------------------------------------------------------------------------------------------------------------------------------------------------------------------------------------------------------|
| Lazar 2015 <sup>70</sup>    | 48% | Israel        | Children   | 4162 patients, 1 hospital    | Children           | Mixed             | PICU          | p=0.01, incidence of BSI<br>p=0.03, nosocomial BSI                                                                                                                                                                                                                                           | p=0.26, community-acquired BSI                                                                                         |                                                                                                                                                                                                                                                         |
| McDonald 2019 <sup>80</sup> | 48% | Canada        | Unclear    | 1 hospital relocation        | Mixed              | Mixed             | Mixed         | Enterococcus, MRSA, and <i>Clostridium difficile</i> infections per 10,000 patient-days                                                                                                                                                                                                      | p=NS, decline in rates of <i>Clostridium difficile</i> and MRSA infection                                              |                                                                                                                                                                                                                                                         |
| Puumala 2020 <sup>102</sup> | 67% | United States | Neonates   | 9995 patients, 1 hospital    | Premature neonates | Emergency         | NICU          | p=0.02, sepsis in preterm infants (<28 weeks preterm)                                                                                                                                                                                                                                        | p=0.43, sepsis in preterm infants (28 – 32 weeks preterm)<br>p=0.42, sepsis in preterm infants (32 – 37 weeks preterm) | p=0.001 sepsis in term/post-term infants (>37 weeks)                                                                                                                                                                                                    |
| Song 2018 <sup>119</sup>    | 63% | United States | Neonates   | 171 patients, 1 hospital     | Premature neonates | Emergency         | NICU          | hospital-acquired ESBL-E incidence                                                                                                                                                                                                                                                           |                                                                                                                        |                                                                                                                                                                                                                                                         |
| Teltsch 2011 <sup>131</sup> | 67% | Canada        | Adults     | 19343 patients, 2 hospitals  | Unclear            | Unclear           | ICU           | positive cultures per 10,000 patient-days for yeast, coagulase-negative <i>Staphylococcus</i> spp, <i>Enterococcus</i> spp, <i>Staphylococcus aureus</i> , <i>Escherichia</i> spp, <i>Pseudomonas</i> spp, <i>Klebsiella</i> spp, <i>Clostridium difficile</i> , <i>Corynebacterium</i> spp, |                                                                                                                        | Positive cultures per 10,000 patient-days for <i>Enterobacter</i> spp, <i>Haemophilus</i> spp, MRSA, <i>Streptococcus viridans</i> , <i>Acinetobacter</i> spp, <i>Streptococcus pneumoniae</i> , Group B <i>Streptococcus</i> spp, <i>Neisseria</i> spp |

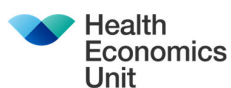

| Citation                           | QA  | Location      | Population | Number of patients/hospitals | Patient type       | Type of admission | Level of care | Data that favour single room                                                                                                                                                                                  | Data showing no difference                                                                                                                                                                                                                                        | Data that favour shared room                  |
|------------------------------------|-----|---------------|------------|------------------------------|--------------------|-------------------|---------------|---------------------------------------------------------------------------------------------------------------------------------------------------------------------------------------------------------------|-------------------------------------------------------------------------------------------------------------------------------------------------------------------------------------------------------------------------------------------------------------------|-----------------------------------------------|
|                                    |     |               |            |                              |                    |                   |               | <i>Stenotrophomonas maltophilia, Citrobacter spp, Proteus mirabilis, Serratia spp, fungi, VRE, Lactobacillus spp, anaerobic cocci, Morganella spp, Bacteroides spp, Moraxella spp</i>                         |                                                                                                                                                                                                                                                                   |                                               |
| Van der Hoeven 2022 <sup>135</sup> | 63% | Netherlands   | Neonates   | 1293 patients, 1 hospital    | Premature neonates | Unclear           | NICU          | Infection of multidrug-resistant organisms<br>Colonisation of third-generation cephalosporin resistant bacteria                                                                                               | Multidrug-resistant organisms:<br>Bacteraemia<br>Colonisation of third-generation cephalosporin resistant bacteria<br>Third-generation cephalosporin resistant bacteria:<br>Bacteraemia                                                                           | Colonisation of multidrug-resistant organisms |
| Van Veenendaal 2020 <sup>137</sup> | 70% | Netherlands   | Neonates   | 1152 patients, 1 hospital    | Neonates           | Emergency         | NICU          | % treated for early-onset sepsis<br>Overall late-onset sepsis<br>OR 0.55, 0.34-0.90<br>OR <sup>a</sup> 0.49, 0.30-0.81<br>Late-onset probable sepsis<br>OR 0.64, 0.38-1.08<br>OR <sup>a</sup> 0.56, 0.32-0.96 | Culture-proven late-onset sepsis<br>OR 0.83, 0.44-1.56<br>OR <sup>a</sup> 0.74, 0.39-1.41<br>Symptoms of late-onset sepsis<br>OR 0.22, 0.05-1.01<br>OR <sup>a</sup> 0.24, 0.05-1.08<br>Late-onset sepsis<br>OR 0.40, 0.16-1.03<br>OR <sup>a</sup> 0.34, 0.13-1.91 |                                               |
| Vietri 2004 <sup>139</sup>         | 59% | United States | Adults     | 261 patients, 1 hospital     | Mixed              | Unclear           | Routine       |                                                                                                                                                                                                               | Positive MRSA culture                                                                                                                                                                                                                                             |                                               |

| Citation                          | QA  | Location       | Population       | Number of patients/hospitals                                                     | Patient type                           | Type of admission   | Level of care | Data that favour single room                                                                                                                                                                                     | Data showing no difference                                         | Data that favour shared room |
|-----------------------------------|-----|----------------|------------------|----------------------------------------------------------------------------------|----------------------------------------|---------------------|---------------|------------------------------------------------------------------------------------------------------------------------------------------------------------------------------------------------------------------|--------------------------------------------------------------------|------------------------------|
| Vohr 2017 <sup>140</sup>          | 67% | United States  | Neonates         | 651 patients, 1 hospital                                                         | Premature neonates                     | Emergency           | NICU          | $p=0.09$ , sepsis or necrotizing enterocolitis $\geq$ Bell stage IIA                                                                                                                                             | $p=0.052$ , late-onset sepsis                                      |                              |
| Walsh 2006 <sup>142</sup>         | 33% | United States  | Neonates         | 127 nurses, 1 hospital                                                           | Neonates                               | Emergency           | NICU          | $p<0.05$ , catheter-related BSI                                                                                                                                                                                  |                                                                    |                              |
| <b>Contemporaneous comparison</b> |     |                |                  |                                                                                  |                                        |                     |               |                                                                                                                                                                                                                  |                                                                    |                              |
| Bevan 2016 <sup>5</sup>           | 59% | United Kingdom | Adults, Elderly  | 50 patients, 2 hospitals                                                         | Acute medical illness                  | Emergency           | Routine       | Patient perception of hygiene and infection risk                                                                                                                                                                 |                                                                    |                              |
| Bocquet 2021 <sup>9</sup>         | 74% | France         | Adults, Children | 233 patients, 1 hospital                                                         | Mixed, Influenza                       | Elective, Emergency | Routine       | Nosocomial cases<br>Community-acquired cases                                                                                                                                                                     |                                                                    |                              |
| Bracco 2007 <sup>13</sup>         | 74% | Canada         | Adults           | 2522 patients (of whom 207 known MRSA carriers at admission), 1 hospital, 1 ward | Mixed, Post surgery, Medical admission | Mixed               | ICU           | $p<0.001^{u,m}$ , risk of BSI<br>$p<0.05^{u,m}$ , risk of MRSA acquisition<br>$p=0.001^{u,m}$ , risk of <i>Pseudomonas</i> spp acquisition<br>$p<0.001^u$<br>$p<0.03^m$ , risk of <i>Candida</i> spp acquisition |                                                                    |                              |
| Caruso 2014 <sup>19</sup>         | 74% | Brazil         | Adults           | 1253 patients, 1 hospital                                                        | Adults                                 | Mixed               | ICU           |                                                                                                                                                                                                                  | $p=0.19$ acquired infections                                       |                              |
| Cobo 2001 <sup>20</sup>           | 74% | Spain          | Adults           | 50 patients, 1 hospital, 2 wards                                                 | Respiratory, HIV                       | Unclear             | Routine       |                                                                                                                                                                                                                  | $p=0.052$ , likelihood of multi-drug resistant tuberculosis due to |                              |



| Citation                      | QA  | Location      | Population                | Number of patients/hospitals      | Patient type                                                              | Type of admission | Level of care | Data that favour single room                                    | Data showing no difference                                                                    | Data that favour shared room                                                      |
|-------------------------------|-----|---------------|---------------------------|-----------------------------------|---------------------------------------------------------------------------|-------------------|---------------|-----------------------------------------------------------------|-----------------------------------------------------------------------------------------------|-----------------------------------------------------------------------------------|
|                               |     |               |                           |                                   |                                                                           |                   |               |                                                                 | <i>Mycobacterium bovis</i>                                                                    |                                                                                   |
| Everts 1996 <sup>39</sup>     | 52% | New Zealand   | Elderly                   | 27 patients, 1 hospital           | Unclear                                                                   | Rehabilitation    | Routine       | Cases of clinical influenza                                     |                                                                                               |                                                                                   |
| Ford-Jones 1990 <sup>44</sup> | 52% | Canada        | Children                  | 1530 patients                     | Cardiological, General admission, Neurosurgical                           | Unclear           | Routine       | Cases of nosocomial diarrhoea (GA and neurosurgical unit)       | Cases of nosocomial diarrhoea (cardiological unit)                                            |                                                                                   |
| Fraenkel 2018 <sup>45</sup>   | 67% | Sweden        | Adults, Children, Elderly | 251 patients, 8 hospitals         | Mixed (all hospitalised patients who acquired norovirus during admission) | Unclear           | Routine       | p<0.01, norovirus                                               |                                                                                               |                                                                                   |
| Harris 2006 <sup>50</sup>     | 63% | United States | Neonates                  | 21 parents, 75 HCPs, 11 hospitals | Neonates                                                                  | Emergency         | NICU          |                                                                 | Nosocomial BSI                                                                                | Nosocomial pneumonia                                                              |
| Julian 2015 <sup>61</sup>     | 78% | United States | Neonates                  | 1823 patients 1 hospital, 1 unit  | Neonates                                                                  | Mixed             | NICU          | p=0.039, MRSA colonization rate for each additional one patient | p=0.10, incidence of MRSA colonization<br>p=0.89, <i>Clostridium difficile</i> infection rate |                                                                                   |
| Jou 2015 <sup>60</sup>        | 74% | United States | Adults                    | 225 patients, 1 hospital          | Mixed                                                                     | Elective          | Mixed         |                                                                 |                                                                                               | p=0.001, nosocomial <i>Clostridium difficile</i> infection<br>p<0.001, malignancy |

| Citation                   | QA   | Location                      | Population                    | Number of patients/hospitals                                 | Patient type                     | Type of admission | Level of care | Data that favour single room                                                      | Data showing no difference                                                                                                                                  | Data that favour shared room |
|----------------------------|------|-------------------------------|-------------------------------|--------------------------------------------------------------|----------------------------------|-------------------|---------------|-----------------------------------------------------------------------------------|-------------------------------------------------------------------------------------------------------------------------------------------------------------|------------------------------|
| Kinnula 2008 <sup>64</sup> | 63%  | Finland                       | Children                      | 1927 patients, 1 hospital                                    | Children, infectious disease     | Mixed             | Routine       | p=0.03, risk for hospital acquired infection                                      |                                                                                                                                                             |                              |
| Kinnula 2012 <sup>65</sup> | 67%  | Finland, Switzerland          | Children                      | 5119 patients, 3 hospitals, 4 wards                          | Children, mixed                  | Mixed             | Routine       | p<0.001, risk for hospital acquired infection during hospitalization (1 hospital) | p=0.56, risk for hospital acquired infection during hospitalization (1 hospital)<br>p=NS, risk of hospital acquired infection after discharge (3 hospitals) |                              |
| Liu 2019 <sup>74</sup>     | 100% | Canada                        | Adults                        | 1 hospital<br>15 parents of hospitalised infants             | Neonates                         | Emergency         | ICU           | Parents' perception (reduced spread of infection)                                 |                                                                                                                                                             |                              |
| Lorenz 2011 <sup>75</sup>  | 78%  | United States                 | Adults, Elderly               | 166 patients, 1 hospital                                     | Medical, Surgical, Oncologic     | Unclear           | Routine       |                                                                                   | p=NS, hospital-acquired infections                                                                                                                          |                              |
| Mattner 2007 <sup>79</sup> | 74%  | Germany                       | Adults                        | 336 patients, 1 hospital                                     | Cardiovascular, Thoracic surgery | Mixed             | ICU           |                                                                                   | Enterococci<br>OR 1.06, 0.36-3.12<br>p=0.91                                                                                                                 |                              |
| Monson 2018 <sup>86</sup>  | 78%  | United States                 | Neonates                      | 90 preterm infants, 15 term-born control infants, 1 hospital | Preterm neonates                 | Emergency         | NICU          |                                                                                   | p=0.38, infection                                                                                                                                           |                              |
| Morgan 2010 <sup>87</sup>  | 44%  | United Kingdom, United States | Adolescents, Adults, Children | 146 patients, 114 HCP, 2 hospitals                           | Unclear                          | Mixed             | Routine       | HCP preference for isolation and infection control                                |                                                                                                                                                             |                              |

| Citation                         | QA   | Location              | Population | Number of patients/hospitals                                                        | Patient type               | Type of admission | Level of care | Data that favour single room                                                                                            | Data showing no difference             | Data that favour shared room |
|----------------------------------|------|-----------------------|------------|-------------------------------------------------------------------------------------|----------------------------|-------------------|---------------|-------------------------------------------------------------------------------------------------------------------------|----------------------------------------|------------------------------|
| Munier-Marion 2016 <sup>88</sup> | 74%  | France                | Adults     | 93 patients, 1 hospital                                                             | Geriatric, Mixed, Surgical | Unclear           | Routine       | p=0.028, p=0.039 <sup>a</sup> , risk of hospital-acquired influenza                                                     | p=0.16, influenza vaccination coverage |                              |
| O'Neill 2018 <sup>94</sup>       | 74%  | United States         | Mixed      | >1 million patients, 218 hospitals with >50% private rooms, 117 with >50% bay rooms | Mixed                      | Mixed             | Mixed         | p<0.001, p=0.005 <sup>a</sup> , central-line-associated BSIs<br>p<0.001, central-line-associated BSIs related mortality |                                        |                              |
| Park 2020 <sup>95</sup>          | 63%  | United States         | Mixed      | 2,670,855 discharges, 340 hospitals                                                 | Mixed                      | Mixed             | Mixed         | p<0.001, p<0.001 <sup>a</sup> , hospital-acquired MRSA infections                                                       |                                        |                              |
| Pilmis 2020 <sup>99</sup>        | 63%  | France                | Adults     | 107 patients, 1 hospital                                                            | Mixed                      | Unclear           | Routine       | p=0.13 <sup>u</sup> , p=0.0005 <sup>m</sup> , contamination                                                             |                                        |                              |
| Quach 2018 <sup>104</sup>        | 59%  | Canada, United States | Children   | 83,334 patient-days, 2 hospitals                                                    | Mixed                      | Mixed             | Mixed         | p<0.0001, hospital-acquired respiratory viral infections                                                                |                                        |                              |
| Sadatsafavi 2016 <sup>111</sup>  | 100% | Canada                | Unclear    | 8811 patient-days, 1 hospital (simulation)                                          | Medical, Surgical          | Unclear           | ICU           | Annual cases of MRSA acquisition, Pseudomonas species acquisition, and Candida species colonization                     |                                        |                              |
| Stiller 2017 <sup>124</sup>      | 59%  | Germany               | Unclear    | 534 units                                                                           | Unclear                    | Unclear           | ICU           | Polymicrobial BSI OR 0.66, 0.51-0.86                                                                                    |                                        |                              |
| Tandberg 2019 <sup>128</sup>     | 67%  | Norway                | Neonates   | 77 patients, 2 hospitals                                                            | Premature neonates         | Emergency         | NICU          |                                                                                                                         | p=0.36, septicaemia                    |                              |



| Citation                    | QA         | Location      | Population | Number of patients/hospitals               | Patient type | Type of admission | Level of care | Data that favour single room                     | Data showing no difference                                     | Data that favour shared room |
|-----------------------------|------------|---------------|------------|--------------------------------------------|--------------|-------------------|---------------|--------------------------------------------------|----------------------------------------------------------------|------------------------------|
| Vaisman 2018 <sup>133</sup> | 67%        | United States | Adults     | 189 patients, 512/515 controls, 1 hospital | Unclear      | Unclear           | Routine       |                                                  | P=NS, hospital-onset <i>Clostridium difficile</i>              |                              |
| Washam 2018 <sup>143</sup>  | 78%        | United States | Neonates   | 1751 patients, 1 hospital                  | Neonates     | Emergency         | NICU          | p=0.03 <sup>u</sup> , p=0.03 <sup>m</sup> , MRSA |                                                                |                              |
| <b>Evidence synthesis</b>   |            |               |            |                                            |              |                   |               |                                                  |                                                                |                              |
| OECD WHO 2019 <sup>92</sup> | Report 14% | Europe        | NR         | NR                                         | Mixed        | Mixed             | Mixed         | p<0.05, hospital-acquired infections             |                                                                |                              |
| Taylor 2018 <sup>129</sup>  | SLR 91%    | International | NR         | NR                                         | Mixed        | Mixed             | Mixed         | 7 studies found advantages only                  | 3 studies found mixed results<br>4 studies found no difference |                              |
| Voigt 2018 <sup>141</sup>   | SLR 86%    | International | NR         | NR                                         | NR           | Unclear           | Routine       | 10 studies                                       | 5 studies                                                      | 16 studies                   |

**Table 7 Summary of studies reporting data on patient safety**

| Citation                                                                      | QA  | Location       | Population      | Number of patients/hospitals                                    | Patient type                 | Type of admission | Level of care | Data that favour single room | Data showing no difference                                                            | Data that favour shared room                                                                           |
|-------------------------------------------------------------------------------|-----|----------------|-----------------|-----------------------------------------------------------------|------------------------------|-------------------|---------------|------------------------------|---------------------------------------------------------------------------------------|--------------------------------------------------------------------------------------------------------|
| <b>Before and after a hospital relocation plus Contemporaneous comparison</b> |     |                |                 |                                                                 |                              |                   |               |                              |                                                                                       |                                                                                                        |
| Maben 2016 <sup>77</sup>                                                      | 67% | United Kingdom | Unclear         | 32 patients, 21 HCP, 1 hospital relocation, 2 control hospitals | Mixed                        | Unclear           | Mixed         |                              |                                                                                       | Falls per 1,000 patient-days                                                                           |
| <b>Before and after a hospital relocation</b>                                 |     |                |                 |                                                                 |                              |                   |               |                              |                                                                                       |                                                                                                        |
| Davis 2019 <sup>25</sup>                                                      | 67% | Australia      | Adults          | 1569 patients, 1 hospital relocation                            | Orthopaedic                  | Elective          | Routine       |                              | p=0.599<br>Falls in hospital<br>p=0.491<br>Unwitnessed fall<br>p=0.082<br>Second fall |                                                                                                        |
| Reid 2015 <sup>107</sup>                                                      | 48% | United Kingdom | Adult, Elderly  | 89 patients, 1 hospital relocation                              | Geriatric                    | Rehabilitation    | Routine       |                              | Falls per 1,000 occupied bed days                                                     |                                                                                                        |
| Singh 2015 <sup>116</sup>                                                     | 70% | United Kingdom | Adults, Elderly | 1749 patients, 1 hospital relocation                            | Internal medicine, Geriatric | Mixed             | Routine       |                              |                                                                                       | p<0.01, p<0.01 <sup>a</sup> , falls per 1,000 patient-bed days<br>p<0.001, falls per in-patient faller |
| <b>Contemporaneous comparison</b>                                             |     |                |                 |                                                                 |                              |                   |               |                              |                                                                                       |                                                                                                        |
| Knight 2016 <sup>66</sup>                                                     | 59% | United Kingdom | Elderly         | 100 patients, 2 hospitals                                       | Geriatric, Dementia          | Mixed             | Routine       |                              | p=0.83, number of patients who sustained inpatient falls                              | p=0.035, falls per inpatient faller                                                                    |
| Lorenz 2011 <sup>75</sup>                                                     | 78% | United States  | Adults, Elderly | 166 patients, 1 hospital                                        | Medical, Surgical, Oncologic | Unclear           | Routine       |                              | p=0.37, likelihood of falls                                                           |                                                                                                        |



| Citation                     | QA         | Location      | Population | Number of patients/hospitals | Patient type | Type of admission | Level of care | Data that favour single room | Data showing no difference    | Data that favour shared room     |
|------------------------------|------------|---------------|------------|------------------------------|--------------|-------------------|---------------|------------------------------|-------------------------------|----------------------------------|
| Poncette 2021 <sup>101</sup> | 55%        | Germany       | Unclear    | 21 beds, 1 hospital          | Unclear      | Unclear           | ICU           |                              |                               | Alarms raised per bed            |
| <b>Evidence synthesis</b>    |            |               |            |                              |              |                   |               |                              |                               |                                  |
| OECD WHO 2019 <sup>92</sup>  | Report 14% | Europe        | NR         | NR                           | Mixed        | Mixed             | Mixed         | p<0.05, patient falls        |                               |                                  |
| Taylor 2018 <sup>129</sup>   | SLR 91%    | International | Adults     | NR                           | Mixed        | Mixed             | Mixed         |                              | No difference                 | 1 study found disadvantages only |
| Voigt 2018 <sup>141</sup>    | SLR 86%    | International | NR         | NR                           | NR           | Unclear           | Routine       |                              | 5 studies found no difference |                                  |

**Table 8. Summary of studies reporting data on readmissions and reinterventions**

| Citation                          | QA  | Location  | Population | Number of patients/ hospitals | Patient type     | Type of admission | Level of care | Data that favour single room | Data showing no difference | Data that favour shared room             |
|-----------------------------------|-----|-----------|------------|-------------------------------|------------------|-------------------|---------------|------------------------------|----------------------------|------------------------------------------|
| <b>Contemporaneous comparison</b> |     |           |            |                               |                  |                   |               |                              |                            |                                          |
| Erdeve 2008 <sup>36</sup>         | 74% | Turkey    | Infants    | 60 infants, 1 hospital        | Preterm neonates | Emergency         | ICU           | p<0.05, hospitalisation      |                            |                                          |
| Felice Tong 2018 <sup>40</sup>    | 78% | Australia | Adults     | 185 patients, 1 hospital      | Orthopaedic      | Elective          | Routine       |                              |                            | p=0.03, return to theatre within 6 weeks |

**Table 9. Summary of studies reporting views on privacy**

| Citation                                                                      | QA   | Location       | Population | Number of patients/hospitals                                    | Patient type | Type of admission | Level of care | Data that favour single room                                                                                           | Data showing no difference                                                                                           | Data that favour shared room |
|-------------------------------------------------------------------------------|------|----------------|------------|-----------------------------------------------------------------|--------------|-------------------|---------------|------------------------------------------------------------------------------------------------------------------------|----------------------------------------------------------------------------------------------------------------------|------------------------------|
| <b>Before and after a hospital relocation plus Contemporaneous comparison</b> |      |                |            |                                                                 |              |                   |               |                                                                                                                        |                                                                                                                      |                              |
| Maben 2016 <sup>77</sup>                                                      | 67%  | United Kingdom | Unclear    | 32 patients, 21 HCP, 1 hospital relocation, 2 control hospitals | Mixed        | Unclear           | Mixed         | Qualitative (privacy, comfort, personal control, visitor flexibility)                                                  |                                                                                                                      |                              |
| <b>Before and after a hospital relocation</b>                                 |      |                |            |                                                                 |              |                   |               |                                                                                                                        |                                                                                                                      |                              |
| Anåker 2019 <sup>3</sup>                                                      | 90%  | Sweden         | Adults     | 16 patients, 1 hospital                                         | Stroke       | Rehabilitation    | Routine       | Qualitative (privacy, personal control)                                                                                |                                                                                                                      |                              |
| Carlson 2006 <sup>17</sup>                                                    | 33%  | United States  | Neonates   | 1 hospital, Patients unclear                                    | Neonates     | Emergency         | ICU           | Parent-reported privacy                                                                                                |                                                                                                                      |                              |
| Carter 2008 <sup>18</sup>                                                     | 33%  | United States  | Adults     | 1 hospital 53 parents                                           | Neonates     | Emergency         | ICU           | p<0.001, patients' perception of privacy                                                                               |                                                                                                                      |                              |
| Curtis 2017 <sup>21</sup>                                                     | 80%  | United Kingdom | Children   | 1 hospital, 4 wards<br>17 patients, 60 caregivers, 60 HCPs      | Paediatric   | Unclear           | Routine       | Qualitative (privacy)                                                                                                  |                                                                                                                      |                              |
| Davis 2019 <sup>25</sup>                                                      | 67%  | Australia      | Adults     | 1569 patients, 1 hospital relocation                            | Orthopaedic  | Elective          | Routine       | Perception of privacy                                                                                                  |                                                                                                                      |                              |
| Domanico 2010 <sup>28</sup>                                                   | 63%  | United States  | Parents    | 1 hospital, 2 units<br>161 caregivers                           | Paediatric   | NR                | NICU          | p<0.001, privacy for bonding (long-stay)<br>Transitional parent perceptions: privacy for bonding and for breastfeeding | p=NS, privacy for bonding (short stay)<br>p=0.111 (short stay),<br>p=0.076 (long stay),<br>privacy for breastfeeding |                              |
| Dowling 2012 <sup>32</sup>                                                    | 63%  | United States  | Parents    | 1 hospital<br>40 mothers                                        | Neonates     | Emergency         | ICU           |                                                                                                                        | p=NS, comfortable pumping breastmilk                                                                                 |                              |
| Ferri 2015 <sup>41</sup>                                                      | 100% | Canada         | Unclear    | 1 hospital, 39 HCPs (13 nurses,                                 | Unclear      | Unclear           | ICU           | Qualitative (privacy)                                                                                                  |                                                                                                                      |                              |



| Citation                   | QA   | Location       | Population       | Number of patients/hospitals                                                              | Patient type                                  | Type of admission | Level of care | Data that favour single room                                                                                                                       | Data showing no difference    | Data that favour shared room |
|----------------------------|------|----------------|------------------|-------------------------------------------------------------------------------------------|-----------------------------------------------|-------------------|---------------|----------------------------------------------------------------------------------------------------------------------------------------------------|-------------------------------|------------------------------|
|                            |      |                |                  | 7 respiratory therapists), 5 HCPs (other), 6 physicians, 4 family members 4 support staff |                                               |                   |               |                                                                                                                                                    |                               |                              |
| Florey 2009 <sup>42</sup>  | 44%  | United Kingdom | Adults           | 2 hospitals, 1 before and after move, 80 patients                                         | Medical and surgical, Adults                  | Unclear           | Routine       | p<0.001, discussing personal matters<br>p<0.001, patient preference                                                                                |                               |                              |
| Harris 2004 <sup>49</sup>  | 74%  | Canada         | Adults           | 1 hospital, 976 patients                                                                  | Pregnant women                                | Maternity         | Routine       | p=0.01, physicians' perception of privacy                                                                                                          |                               |                              |
| Janssen 2000 <sup>56</sup> | 56%  | Canada         | Adults           | 1 hospital, 426 patients                                                                  | Pregnant women                                | Maternity         | Routine       | p<0.001, respect shown by caregiver for privacy<br>p<0.001, greater number of different nurses, doctors, and staff who interacted with the patient |                               |                              |
| Jones 2016 <sup>58</sup>   | 100% | Australia      | Adults, Neonates | 1 hospital relocation 66 mothers, 51 nurses                                               | Adults, Mothers of premature neonates, Nurses | Maternity         | NICU          | Qualitative (privacy)                                                                                                                              |                               |                              |
| Milford 2008 <sup>84</sup> | 30%  | United States  | Neonates         | 1 hospital, patients unclear                                                              | Neonates                                      | Emergency         | ICU           | Staff perceptions of privacy                                                                                                                       |                               |                              |
| Real 2018 <sup>105</sup>   | 56%  | United States  | Unclear          | 111 patients, 77 nurses, 1 hospital                                                       | Cardio-vascular                               | Unclear           | Routine       | Privacy                                                                                                                                            | Communication Help from staff |                              |
| Reid 2015 <sup>107</sup>   | 48%  | United Kingdom | Adult, Elderly   | 89 patients, 1 hospital relocation                                                        | Geriatric                                     | Rehabilitation    | Routine       | Qualitative (privacy)                                                                                                                              |                               |                              |

| Citation                          | QA  | Location       | Population      | Number of patients/hospitals                  | Patient type                           | Type of admission  | Level of care | Data that favour single room                                                   | Data showing no difference | Data that favour shared room |
|-----------------------------------|-----|----------------|-----------------|-----------------------------------------------|----------------------------------------|--------------------|---------------|--------------------------------------------------------------------------------|----------------------------|------------------------------|
| Roos 2020 <sup>108</sup>          | 90% | Norway         | Adults          | 39 patients, 1 hospital relocation            | Internal medicine, Surgical, Maternity | Maternity, Unclear | Routine       | Qualitative (privacy)                                                          |                            |                              |
| Stevens 2011 <sup>121</sup>       | 52% | United States  | Adults          | 1 hospital, 147 patients                      | Neonates                               | Emergency          | ICU           | Patient-reported privacy                                                       |                            |                              |
| Swanson 2013 <sup>125</sup>       | 37% | United States  | Adults          | 1 hospital 55 parents                         | Neonates                               | Emergency          | ICU           | p<0.05, nurses', patients', and advanced practitioners' perceptions of privacy |                            |                              |
| <b>Contemporaneous comparison</b> |     |                |                 |                                               |                                        |                    |               |                                                                                |                            |                              |
| Apple 2014 <sup>4</sup>           | 52% | Sweden         | Adults          | 3 ICUs 81 HCP                                 | Mixed                                  | Unclear            | ICU           | Staff perceptions of privacy                                                   |                            |                              |
| Bevan 2016 <sup>5</sup>           | 59% | United Kingdom | Adults, elderly | 2 hospitals 50 patients                       | Aged 65+ years with acute illness      | Emergency          | Routine       | Qualitative (privacy)                                                          |                            |                              |
| Bodack 2016 <sup>10</sup>         | 56% | Germany        | Adults          | 1 hospital 35 pairs of parents of 40 neonates | Neonates                               | Emergency          | ICU           | Patient reported privacy                                                       |                            |                              |
| Boztepe 2017 <sup>12</sup>        | 63% | Turkey         | Children        | 1 hospital, 1 ward 130                        | Children                               | Mixed              | Routine       |                                                                                |                            | Lack of privacy              |
| Deitrick 2010 <sup>26</sup>       | 90% | United States  | Adults          | 24 patients, 29 HCP, 2 hospitals, 2 wards     | Orthopaedic, Neurological, Surgical    | Unclear            | Routine       | Patient preference for privacy                                                 |                            |                              |
| Douglas 2005 <sup>30</sup>        | 90% | United Kingdom | Adults          | 1 hospital 785 patients (post discharge)      | Adults                                 | Unclear            | Routine       |                                                                                | <i>Mixed results</i>       |                              |
| Ehrlander 2009 <sup>35</sup>      | 78% | United States  | Adults, elderly | 1 hospital 117 patients                       | Adults                                 | Unclear            | Routine       | p<0.01, adequate privacy                                                       |                            |                              |

| Citation                    | QA   | Location                      | Population      | Number of patients/hospitals                                            | Patient type                                        | Type of admission | Level of care | Data that favour single room                                                       | Data showing no difference | Data that favour shared room |
|-----------------------------|------|-------------------------------|-----------------|-------------------------------------------------------------------------|-----------------------------------------------------|-------------------|---------------|------------------------------------------------------------------------------------|----------------------------|------------------------------|
| Harris 2006 <sup>50</sup>   | 63%  | United States                 | Adults          | 5 NICU units<br>SFR=2<br>Open-bay=3<br>HCPs=75<br>Parents=21            | Neonates                                            | Maternity         | Level 3, NICU | Parent preference for privacy                                                      |                            |                              |
| Hosseini 2017 <sup>52</sup> | 63%  | Iran                          | Adults          | 2 hospitals<br>132 patients                                             | Adults, Medical or surgical                         | Unclear           | Routine       | p<0.001, adequate privacy                                                          |                            |                              |
| Janssen 2006 <sup>57</sup>  | 59%  | Canada                        | Adults          | 1 hospital, 2 wards<br>415 patients                                     | Pregnant women                                      | Maternity         | Routine       | Patient satisfaction with for respect for privacy                                  |                            |                              |
| Liu 2019 <sup>74</sup>      | 100% | Canada                        | Adults          | 1 hospital<br>15 parents of hospitalised infants                        | Neonates                                            | Emergency         | ICU           | Privacy enabled the learning and practice of caregiving skills                     |                            |                              |
| Malcolm 2005 <sup>78</sup>  | 80%  | New Zealand                   | Adults          | Hospitals unclear, 12 former patients                                   | Mixed surgery, orthopaedic, medical, obstetric, ENT | Mixed             | Routine       | Qualitative (privacy)                                                              |                            | Qualitative (supportive)     |
| Morgan 2010 <sup>87</sup>   | 44%  | United Kingdom, United States | Children        | 2 hospitals<br>146 patients, 114 HCP                                    | Children                                            | Mixed             | Routine       | Patient perception (privacy)<br>HCP perception (privacy, dignity, confidentiality) |                            |                              |
| Nahas 2016 <sup>89</sup>    | 56%  | United Kingdom                | Adults, Elderly | 60 patients, 2 hospitals                                                | Orthopaedic                                         | Elective          | Routine       | p=0.004, better privacy                                                            |                            |                              |
| Nash 2021 <sup>90</sup>     | 63%  | Australia                     | Adults          | 4 hospitals<br>602 patients                                             | Indigenous Adults                                   | Theoretical       | Routine       | Qualitative (privacy)                                                              |                            |                              |
| Nassery 2019 <sup>91</sup>  | 90%  | Sweden                        | Adults          | 1 hospital, 13 interviews (9 individual parents and 4 pairs of parents) | Children                                            | Unclear           | Mixed         | Qualitative (privacy, comfort)                                                     |                            |                              |

| Citation                                              | QA            | Location       | Population      | Number of patients/hospitals            | Patient type                             | Type of admission | Level of care | Data that favour single room                              | Data showing no difference                      | Data that favour shared room                 |
|-------------------------------------------------------|---------------|----------------|-----------------|-----------------------------------------|------------------------------------------|-------------------|---------------|-----------------------------------------------------------|-------------------------------------------------|----------------------------------------------|
| Olson 1992 <sup>93</sup>                              | 52%           | United States  | Adults          | 1 hospital<br>351 patients,<br>28 HCP   | Pregnant women                           | Maternity         | Routine       | Patient preference (privacy)                              |                                                 |                                              |
| Persson 2012 <sup>97</sup>                            | 90%           | Sweden         | Adults, Elderly | 16 patients,<br>10 nurses<br>1 hospital | Orthopaedic, Surgical                    | Unclear           | Routine       | Patients in shared rooms signalled their need for privacy |                                                 |                                              |
| Persson 2015 <sup>98</sup>                            | 90%           | Sweden         | Adults          | 16 patients,<br>1 hospital              | Surgical                                 | Unclear           | Routine       | Feelings of homeliness                                    |                                                 |                                              |
| Rowlands 2008 <sup>110</sup>                          | 90%           | United Kingdom | Adults          | 1 hospital<br>12                        | Adults with advanced cancer              | Unclear           | Routine       | Patient preference (privacy)                              |                                                 |                                              |
| Schalkers 2015 <sup>114</sup>                         | 100%          | Netherlands    | Children        | 8 hospitals<br>63 patients              | Children                                 | Mixed             | Routine       | Qualitative (children's preferences for privacy)          |                                                 |                                              |
| Stelwagen 2021 <sup>120</sup>                         | 100%          | Netherlands    | Adults          | 1 hospital<br>36 parents                | Neonates                                 | Emergency         | ICU           |                                                           |                                                 | Privacy violations felt more in single rooms |
| Van de Glind 2008 <sup>134</sup>                      | 74%           | Netherlands    | Adults          | 1 hospital<br>52 encounters             | Urology                                  | Unclear           | Routine       |                                                           | Frequency or content of intimate communications |                                              |
| <b>Evidence synthesis</b>                             |               |                |                 |                                         |                                          |                   |               |                                                           |                                                 |                                              |
| Bradbury-Jones 2013 <sup>14</sup>                     | SLR<br>86%    | International  | Adults          | NR                                      | Mixed, Vulnerable, Learning difficulties | Unclear           | Unclear       | Side rooms ensure privacy                                 |                                                 |                                              |
| Dowdeswell 2004 <sup>31</sup>                         | SLR<br>36%    | International  | Unclear         | Unclear                                 | Mixed                                    | Mixed             | Mixed         | More privacy, which contributes to better outcomes        | No quantifiable evidence of improved outcomes   |                                              |
| Mental Welfare Commission Scotland 1991 <sup>82</sup> | Report<br>30% | United Kingdom | Unclear         | 258 patients,<br>28 hospitals           | Psychiatric                              | Unclear           | Routine       | Easier to meet with visitors                              |                                                 |                                              |

| Citation                        | QA         | Location      | Population | Number of patients/hospitals | Patient type                       | Type of admission | Level of care | Data that favour single room                   | Data showing no difference                        | Data that favour shared room |
|---------------------------------|------------|---------------|------------|------------------------------|------------------------------------|-------------------|---------------|------------------------------------------------|---------------------------------------------------|------------------------------|
| OECD WHO 2019 <sup>92</sup>     | Report 14% | Europe        | NR         | NR                           | Mixed                              | Mixed             | Mixed         | p<0.05, improved patient privacy               |                                                   |                              |
| Søndergaard 2022 <sup>118</sup> | SLR 91%    | International | NR         | NR                           | Acute, Surgical, Internal medicine | Unclear           | Routine       | Privacy, personal control and self-empowerment |                                                   |                              |
| Taylor 2018 <sup>129</sup>      | SLR 91%    | International | NR         | NR                           | Mixed                              | Mixed             | Mixed         |                                                | All studies reported advantages and disadvantages |                              |

**Table 10. Summary of studies reporting views on patients' loneliness/isolation and family contact**

| Citation                                                                      | QA  | Location       | Population      | Number of patients/hospitals                                    | Patient type                     | Type of admission | Level of care | Data that favour single room          | Data showing no difference             | Data that favour shared room                                                                                                                                                                                             |
|-------------------------------------------------------------------------------|-----|----------------|-----------------|-----------------------------------------------------------------|----------------------------------|-------------------|---------------|---------------------------------------|----------------------------------------|--------------------------------------------------------------------------------------------------------------------------------------------------------------------------------------------------------------------------|
| <b>Before and after a hospital relocation plus Contemporaneous comparison</b> |     |                |                 |                                                                 |                                  |                   |               |                                       |                                        |                                                                                                                                                                                                                          |
| Maben 2016 <sup>77</sup>                                                      | 67% | United Kingdom | Unclear         | 32 patients, 21 HCP, 1 hospital relocation, 2 control hospitals | Mixed (all patients in hospital) | Unclear           | Mixed         |                                       | Mixed findings regarding communication | Not isolated<br>More interactions with other patients                                                                                                                                                                    |
| <b>Before and after a hospital relocation</b>                                 |     |                |                 |                                                                 |                                  |                   |               |                                       |                                        |                                                                                                                                                                                                                          |
| Anåker 2017 <sup>2</sup>                                                      | 59% | Sweden         | Adults          | 59 patients, 1 hospital                                         | Stroke                           | Rehabilitation    | Routine       |                                       |                                        | Not isolated<br>Availability of interactions with physicians, nurses, nurse assistants, physiotherapists, occupational therapists, speech and language therapist, significant other, other team member, and interpreters |
| Anåker 2019 <sup>3</sup>                                                      | 90% | Sweden         | Adults          | 16 patients, 1 hospital                                         | Stroke                           | Rehabilitation    | Routine       |                                       |                                        | Less feeling of loneliness and emptiness<br>Have company to talk to                                                                                                                                                      |
| Bevan 2016 <sup>5</sup>                                                       | 59% | United Kingdom | Adults, Elderly | 50 patients, 2 hospitals                                        | Acute illness                    | Emergency         | Routine       | Private toilet and showing facilities |                                        | Less feeling of loneliness and isolation<br>Greater companionship and goodwill                                                                                                                                           |

| Citation                        | QA  | Location       | Population  | Number of patients/hospitals                             | Patient type | Type of admission | Level of care | Data that favour single room                                                                                                                                                                                                                                                                         | Data showing no difference                                                                                     | Data that favour shared room                                               |
|---------------------------------|-----|----------------|-------------|----------------------------------------------------------|--------------|-------------------|---------------|------------------------------------------------------------------------------------------------------------------------------------------------------------------------------------------------------------------------------------------------------------------------------------------------------|----------------------------------------------------------------------------------------------------------------|----------------------------------------------------------------------------|
| Campbell-Yeo 2021 <sup>15</sup> | 74% | Canada         | Neonates    | 71 mothers, 2 wards                                      | Neonates     | Emergency         | ICU           | More parental presence and involvement, including time with skin-to-skin contact, singing/ talking/ reading to infant, bathing, diaper changes, and providing comfort during painful procedures. More time partner spent holding infants clothed. Partner attended rounds at least once during stay. | Mothers' attendance at rounds<br><br>Time mothers spent bathing infants                                        | <i>More time mothers spent holding infants clothed</i>                     |
| Curtis 2017 <sup>21</sup>       | 80% | United Kingdom | Children    | 17 patients, 60 caregivers, 60 HCPs, 1 hospital, 4 wards | Paediatric   | Unclear           | Routine       | Enhanced family support                                                                                                                                                                                                                                                                              |                                                                                                                | Socialisation<br>Not isolated                                              |
| Cusack 2019 <sup>22</sup>       | 56% | Australia      | Adults, HCP | 43 nurses, 15 patients, 1 hospital                       | Unclear      | Unclear           | Routine       |                                                                                                                                                                                                                                                                                                      |                                                                                                                | Not isolated                                                               |
| Domanico 2010 <sup>28</sup>     | 63% | United States  | Neonates    | 161 caregivers, 1 hospital, 2 units                      | Paediatric   | NR                | NICU          | p=0.012, ability to relax with child (long stay)                                                                                                                                                                                                                                                     | p=0.065, perceptions of meeting other parents (short stay)<br>p=0.142 (short stay), p=0.542 (long stay), other | Socialisation<br>p=0.036, perceptions of meeting other parents (long stay) |



| Citation                   | QA   | Location       | Population | Number of patients/hospitals                                                                                                      | Patient type                                  | Type of admission | Level of care | Data that favour single room                                                                                                                                        | Data showing no difference                                                                                                                                      | Data that favour shared room                                       |
|----------------------------|------|----------------|------------|-----------------------------------------------------------------------------------------------------------------------------------|-----------------------------------------------|-------------------|---------------|---------------------------------------------------------------------------------------------------------------------------------------------------------------------|-----------------------------------------------------------------------------------------------------------------------------------------------------------------|--------------------------------------------------------------------|
|                            |      |                |            |                                                                                                                                   |                                               |                   |               |                                                                                                                                                                     | parents made stay easier<br>p=0.879, ability to relax with child (short stay)                                                                                   |                                                                    |
| Ferri 2015 <sup>41</sup>   | 100% | Canada         | Adults     | 39 HCPs, of which 13 nurses, 7 respiratory therapists, 5 HCPS (other), 6 physicians, 4 family members 4 support staff, 1 hospital | Unclear                                       | Unclear           | ICU           | Increased visitor presence<br>Increased visitor-provider interaction<br>Accommodates Routine and emergency care<br>Patient satisfaction<br>Confidentiality/ privacy |                                                                                                                                                                 | Socialisation<br>Camaraderie                                       |
| Florey 2009 <sup>42</sup>  | 44%  | United Kingdom | Adults     | 80 patients, 2 hospitals, 1 Before and after move                                                                                 | Medical and surgical, Adults                  | Unclear           | Routine       | p=0.002, better for visitors                                                                                                                                        |                                                                                                                                                                 | p<0.001, less loneliness                                           |
| Janssen 2000 <sup>56</sup> | 56%  | Canada         | Adults     | 426 patients, 1 hospital                                                                                                          | Pregnant women                                | Maternity         | Routine       |                                                                                                                                                                     | <i>Patient satisfaction regardless of room design:<br/>p=0.005, time spent with support person<br/>p=0.007, time spent with baby<br/>p=0.39, amount of rest</i> |                                                                    |
| Jones 2016 <sup>58</sup>   | 100% | Australia      | Neonates   | 66 mothers, 51 nurses, 1 hospital relocation                                                                                      | Adults, Mothers of premature neonates, Nurses | Maternity         | NICU          | Qualitative (personal control, homeliness, accommodates overnight stay, facilitates mother-                                                                         |                                                                                                                                                                 | p<0.05, more support<br><br>Qualitative objections to single rooms |



| Citation                      | QA  | Location       | Population      | Number of patients/hospitals                             | Patient type                           | Type of admission         | Level of care | Data that favour single room                                                | Data showing no difference                                       | Data that favour shared room                                                                                                                                                         |
|-------------------------------|-----|----------------|-----------------|----------------------------------------------------------|----------------------------------------|---------------------------|---------------|-----------------------------------------------------------------------------|------------------------------------------------------------------|--------------------------------------------------------------------------------------------------------------------------------------------------------------------------------------|
|                               |     |                |                 |                                                          |                                        |                           |               | infant connection, confidence, parental skills, breastfeeding, and bonding) |                                                                  | (inconsistent or lack of information, poor interpersonal skills, loneliness, isolation; shared rooms - shared information from other patients, and other patient-nurse interactions) |
| Kainiemi 2021 <sup>63</sup>   | 59% | Finland        | Neonates        | 61 families, 1 hospital, 1 unit (pre-post-restructuring) | Pre-term infants (<35 weeks)           | Unclear                   | NICU          | p<0.0001, parents', mother's, and father's presence                         | p=NS, skin-to-skin contact with either parent, mother, or father |                                                                                                                                                                                      |
| Real 2018 <sup>105</sup>      | 56% | United States  | Unclear         | 111 patients, 77 nurses, 1 hospital                      | Cardio-vascular                        | Unclear                   | Routine       | Qualitative (visitor comfort, better family dynamic)                        |                                                                  |                                                                                                                                                                                      |
| Reid 2015 <sup>107</sup>      | 48% | United Kingdom | Adult, Elderly  | 89 patients, 1 hospital relocation                       | Geriatric                              | Rehabilitation            | Routine       |                                                                             | % feeling lonely                                                 |                                                                                                                                                                                      |
| Roos 2020 <sup>108</sup>      | 90% | Norway         | Adults          | 39 patients, 1 hospital relocation                       | Internal medicine, Surgical, Maternity | Maternity, Unclear        | Routine       | Visiting hours                                                              |                                                                  | Less boredom<br>Not isolated                                                                                                                                                         |
| Rosbergen 2020 <sup>109</sup> | 74% | Australia      | Adults, Elderly | 73 patients, 1 hospital relocation                       | Stroke, Neurological                   | Emergency, Rehabilitation | Routine       | p=0.02, physical activity                                                   | P=NS, social activity<br>Cognitive activity                      | Less feeling of loneliness                                                                                                                                                           |
| Singh 2016 <sup>116</sup>     | 70% | United Kingdom | Adults, Elderly | 100 patients, 1 hospital relocation                      | Internal medicine, Geriatric           | Mixed                     | Routine       |                                                                             |                                                                  | p=0.03 <sup>a</sup> , less feeling of loneliness                                                                                                                                     |
| Stevens 2011 <sup>121</sup>   | 52% | United States  | Neonates        | 147 patients, 1 hospital Before                          | Neonates                               | Emergency                 | ICU           | Space for family Accommodations for parents                                 |                                                                  |                                                                                                                                                                                      |

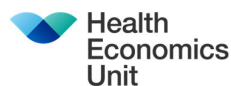

| Citation                         | QA  | Location                     | Population | Number of patients/hospitals                        | Patient type         | Type of admission | Level of care | Data that favour single room                                                                                                          | Data showing no difference                                                                                                      | Data that favour shared room                         |
|----------------------------------|-----|------------------------------|------------|-----------------------------------------------------|----------------------|-------------------|---------------|---------------------------------------------------------------------------------------------------------------------------------------|---------------------------------------------------------------------------------------------------------------------------------|------------------------------------------------------|
|                                  |     |                              |            | and after relocation                                |                      |                   |               |                                                                                                                                       |                                                                                                                                 |                                                      |
| Stevens 2012 <sup>122</sup>      | 44% | United States                | Neonates   | 73 patients, 1 hospital Before and after relocation | Neonates             | Emergency         | ICU           | p=0.017, family-centred care                                                                                                          |                                                                                                                                 |                                                      |
| Toivonen 2017 <sup>132</sup>     | 63% | Finland                      | Neonates   | 20 nurses, 1 hospital Before and after relocation   | Neonates             | Emergency         | ICU           | p<0.0001, total nurse-family interaction time<br>p=0.001, total nurse-parent interaction time                                         | p=NS, total nurse-infant interaction time                                                                                       |                                                      |
| Contemporaneous comparison       |     |                              |            |                                                     |                      |                   |               |                                                                                                                                       |                                                                                                                                 |                                                      |
| Apple 2014 <sup>4</sup>          | 52% | Sweden                       | Unclear    | 81 HCP, 3 ICUs                                      | Mixed                | Unclear           | ICU           | Qualitative support for single rooms (family involvement, family presence during care)                                                |                                                                                                                                 |                                                      |
| Bodack 2016 <sup>10</sup>        | 56% | Germany                      | Neonates   | 35 pairs of parents of 40 neonates, 1 hospital      | Neonates             | Emergency         | ICU           | More secure/confident caring for baby                                                                                                 |                                                                                                                                 | Contact and exchange of knowledge with other parents |
| Darcy Mahoney 2020 <sup>23</sup> | 59% | United States, International | Neonates   | NR, 277 units                                       | Paediatric, new-born | NR                | NICU          | p=0.018, parental presence following COVID-19 restrictions<br>p=0.013, parental presence during rounds prior to COVID-19 restrictions | p=NS, parental presence prior to COVID-19 restrictions<br>p=0.6, parental presence during rounds prior to COVID-19 restrictions |                                                      |

| Citation                                             | QA   | Location      | Population          | Number of patients/hospitals                         | Patient type                                        | Type of admission | Level of care | Data that favour single room                                         | Data showing no difference                                   | Data that favour shared room                                      |
|------------------------------------------------------|------|---------------|---------------------|------------------------------------------------------|-----------------------------------------------------|-------------------|---------------|----------------------------------------------------------------------|--------------------------------------------------------------|-------------------------------------------------------------------|
| De Matos 2020 <sup>27</sup>                          | 63%  | Brazil        | Unclear             | 176 family visitors, 1 hospital, 4 ICU units         | Cancer                                              | Unclear           | ICU           |                                                                      | p=0.52, stress within 24 hrs<br>p=0.15, stress within 7 days |                                                                   |
| Ehrlander 2009 <sup>35</sup>                         | 78%  | United States | Adults              | 117 patients, 1 hospital                             | Adults                                              | Unclear           | Routine       | Accommodates visitors                                                | p=0.913, loneliness                                          | >50% enjoy conversation with room mate and gave help to room mate |
| Erdeve 2008 <sup>36</sup>                            | 74%  | Turkey        | Infants             | 60 infants<br>1 hospital                             | Preterm neonates                                    | Emergency         | ICU           |                                                                      |                                                              | Time spent with infants during non-hospitalised time              |
| Harris 2006, <sup>50</sup> Harris 2006 <sup>51</sup> | 63%  | United States | Neonates            | 75 HCP, 21 parents, 5 NICU units (SFR=2, open bay=3) | Neonates                                            | Unclear           | Level 3, NICU |                                                                      | Contact with other parents                                   |                                                                   |
| Hosseini 2017 <sup>52</sup>                          | 63%  | Iran          | Adults              | 132 patients, 2 hospitals                            | Medical, Surgical                                   | Unclear           | Routine       | p<0.001, visitor convenience                                         |                                                              | p<0.001, less feeling of loneliness                               |
| Liu 2019 <sup>74</sup>                               | 100% | Canada        | Neonates            | 15 parents, 1 hospital                               | Neonates                                            | Emergency         | ICU           | Qualitative (engage in parenting activities beyond basic caregiving) | Qualitative (isolation)                                      |                                                                   |
| Malcolm 2005 <sup>78</sup>                           | 80%  | New Zealand   | Adolescents, Adults | 12 former patients                                   | Mixed surgery, orthopaedic, medical, obstetric, ENT | Mixed             | Routine       |                                                                      |                                                              | Qualitative (camaraderie and support)                             |
| Milford 2008 <sup>84</sup>                           | 30%  | United States | Neonates            | No. of patients unclear, 1 hospital                  | Neonates                                            | Emergency         | ICU           | Staff perception of discussions with families                        |                                                              |                                                                   |

| Citation                   | QA  | Location       | Population      | Number of patients/hospitals       | Patient type                                    | Type of admission | Level of care | Data that favour single room                                                | Data showing no difference                   | Data that favour shared room                                                                                      |
|----------------------------|-----|----------------|-----------------|------------------------------------|-------------------------------------------------|-------------------|---------------|-----------------------------------------------------------------------------|----------------------------------------------|-------------------------------------------------------------------------------------------------------------------|
| Morgan 2010 <sup>87</sup>  | 44% | UK, US         | Children        | 146 patients, 114 HCP, 2 hospitals | Children                                        | Mixed             | Routine       | Patients' privacy<br>Visitor times<br>Undisturbed sleep<br>Personal control |                                              | Patients:<br>Communication<br>Company<br>Entertainment<br><br>HCPs:<br>Interaction with other patients<br>Company |
| Nahas 2016 <sup>89</sup>   | 56% | United Kingdom | Adults, Elderly | 60 patients, 2 hospitals           | Orthopaedic                                     | Elective          | Routine       |                                                                             | p=0.754, isolation<br>p=0.638, loneliness    |                                                                                                                   |
| Nash 2021 <sup>90</sup>    | 63% | United Kingdom | Adults, Elderly | 100 patients,                      | Adults >65 years, recovering from acute illness | Emergency         | Routine       | Company of family, not strangers                                            |                                              | Qualitative (not isolated, social interactions)                                                                   |
| Nassery 2019 <sup>91</sup> | 90% | Sweden         | Children        | 13 parents, 1 hospital             | Children                                        | Unclear           | Mixed         | Qualitative (patient preference, privacy, stress, quieter)                  |                                              | Qualitative (shared experience and advice)                                                                        |
| Olson 1992 <sup>93</sup>   | 52% | United States  | Adults          | 351 patients, 28 HCP, 1 hospital   | Pregnant women                                  | Maternity         | Routine       |                                                                             | <i>Mothers satisfied with visiting hours</i> |                                                                                                                   |
| Pease 2002 <sup>96</sup>   | 48% | United Kingdom | Unclear         | 50 patients, 1 hospital            | Oncologic, Terminal                             | Unclear           | Routine       |                                                                             |                                              | Qualitative (not isolated)                                                                                        |
| Persson 2012 <sup>97</sup> | 90% | Sweden         | Adults, Elderly | 16 patients, 10 nurses, 1 hospital | Orthopaedic, Surgical                           | Unclear           | Routine       |                                                                             |                                              | Qualitative (not isolated)                                                                                        |
| Persson 2015 <sup>98</sup> | 90% | Sweden         | Adults          | 16 patients, 1 hospital            | Surgical                                        | Unclear           | Routine       |                                                                             |                                              | Qualitative (not isolated, company, social contact)                                                               |
| Pineda 2012 <sup>100</sup> | 70% | United States  | Neonates        | 81 patients, 1 hospital            | Premature neonates                              | Emergency         | NICU          | p=0.021 <sup>a</sup> , time parents spent                                   | p=NS, time parents spent holding the infant  |                                                                                                                   |



1  
2  
3  
4  
5  
6  
7  
8  
9  
10  
11  
12  
13  
14  
15  
16  
17  
18  
19  
20  
21  
22  
23  
24  
25  
26  
27  
28  
29  
30  
31  
32  
33  
34  
35  
36  
37  
38  
39  
40  
41  
42  
43  
44  
45  
46  
47

| Citation                     | QA  | Location       | Population | Number of patients/hospitals | Patient type                | Type of admission | Level of care | Data that favour single room                                                                                                                                                                                                                                                          | Data showing no difference                                                                                                                                                                                                                                                                                                                                                                                                                                                                                                                                               | Data that favour shared room      |
|------------------------------|-----|----------------|------------|------------------------------|-----------------------------|-------------------|---------------|---------------------------------------------------------------------------------------------------------------------------------------------------------------------------------------------------------------------------------------------------------------------------------------|--------------------------------------------------------------------------------------------------------------------------------------------------------------------------------------------------------------------------------------------------------------------------------------------------------------------------------------------------------------------------------------------------------------------------------------------------------------------------------------------------------------------------------------------------------------------------|-----------------------------------|
|                              |     |                |            |                              |                             |                   |               | visiting the infant (week 1-2)<br>$p=0.039$ , time spent cuddling, visiting, and with skin-to-skin contact (week 1-2)<br>$p=0.026$ , $p=0.017^a$ , time parents spent visiting the infant during weeks 3-4<br>$p=0.062$ , $p=0.047^a$ , time parents spent visiting the infant by LOS | $p=0.193$ , time parents spent visiting the infant (week 5-term)<br>$p=0.593$ , interval to first time parents hold infant<br>$p=0.810$ , days spent cuddling infant (week 1-2)<br>$p=0.548$ , days spent cuddling infant (week 3-4)<br>$p=0.592$ , days spent cuddling infant (week 5-term)<br>$p=0.361$ , days spent cuddling infant by LOS<br>$p=0.496$ , days with skin-to-skin (week 1-2)<br>$p=0.111$ , days with skin-to-skin contact (week 3-4)<br>$p=0.489$ , days with skin-to-skin contact (week 5-term)<br>$p=0.360$ , days with skin-to-skin contact by LOS |                                   |
| Rowlands 2008 <sup>110</sup> | 90% | United Kingdom | Adults     | 12 patients, 1 hospital      | Adults with advanced cancer | Unclear           | Routine       | Qualitative (privacy)                                                                                                                                                                                                                                                                 |                                                                                                                                                                                                                                                                                                                                                                                                                                                                                                                                                                          | Qualitative (social interactions) |



1  
2  
3  
4  
5  
6  
7  
8  
9  
10  
11  
12  
13  
14  
15  
16  
17  
18  
19  
20  
21  
22  
23  
24  
25  
26  
27  
28  
29  
30  
31  
32  
33  
34  
35  
36  
37  
38  
39  
40  
41  
42  
43  
44  
45  
46  
47

| Citation                      | QA   | Location      | Population       | Number of patients/hospitals                       | Patient type                 | Type of admission | Level of care | Data that favour single room                                                                                                                                                                                                      | Data showing no difference                                                                                           | Data that favour shared room                                                            |
|-------------------------------|------|---------------|------------------|----------------------------------------------------|------------------------------|-------------------|---------------|-----------------------------------------------------------------------------------------------------------------------------------------------------------------------------------------------------------------------------------|----------------------------------------------------------------------------------------------------------------------|-----------------------------------------------------------------------------------------|
| Schalkers 2015 <sup>114</sup> | 100% | Netherlands   | Children         | 8 hospitals<br>63 patients                         | Children                     | Mixed             | Routine       |                                                                                                                                                                                                                                   |                                                                                                                      | Qualitative (company, patient preference if they have similarities with other patients) |
| Stelwagen 2021 <sup>120</sup> | 100% | Netherlands   | Neonates         | 36 parents, 1 hospital Before and after relocation | Neonates                     | Emergency         | ICU           | Qualitative (family communication and closeness, personal control, privacy, tranquillity, comfort, practicing parenting skills)                                                                                                   |                                                                                                                      | Qualitative (not isolated, ability to distance themselves from invasive procedures)     |
| Swanson 2013 <sup>125</sup>   | 37%  | United States | Neonates, Carers | 55 parents, 1 hospital                             | Neonates                     | Emergency         | NICU          | p<0.05 advanced practitioners' satisfaction with communication                                                                                                                                                                    |                                                                                                                      | p<0.05, nurse satisfaction with communication<br>p<0.05, nurse satisfaction with team   |
| Tandberg 2018 <sup>126</sup>  | 70%  | Norway        | Neonates         | 64 patients, 115 parents, 2 hospitals              | Neonates, Premature neonates | Emergency         | ICU           | p<0.001, time mother and father present during first 14 days<br>p=0.02, mother's skin-to-skin contact per 24 h<br>p=0.05, father's skin-to-skin contact per 24 h<br>p=0.02, guidance provided by the staff meets needs of mothers | p=0.53, guidance provided by the staff meets needs of fathers<br>p=0.21, fathers felt their opinions were considered |                                                                                         |

| Citation                     | QA  | Location | Population | Number of patients/hospitals         | Patient type | Type of admission | Level of care | Data that favour single room                                                                                                                                                                                                        | Data showing no difference | Data that favour shared room |
|------------------------------|-----|----------|------------|--------------------------------------|--------------|-------------------|---------------|-------------------------------------------------------------------------------------------------------------------------------------------------------------------------------------------------------------------------------------|----------------------------|------------------------------|
|                              |     |          |            |                                      |              |                   |               | p=0.04, mothers felt their opinions were considered p<0.001 (mothers), p=0.01 (fathers), participation in doctor visits, respectively p=0.05 (mothers), p<0.001 (fathers), emotion support received from staff                      |                            |                              |
| Tandberg 2019 <sup>127</sup> | 67% | Norway   | Infants    | 77 infants, 132 parents, 2 hospitals | Infants      | Emergency         | ICU           | p<0.0001, mother's and father's presence in week 1 p<0.0001, mother's and father's presence per day up to week 34                                                                                                                   |                            |                              |
| Tandberg 2019 <sup>128</sup> | 67% | Norway   | Neonates   | 77 patients, 2 hospitals             | Neonates     | Emergency         | ICU           | p<0.001, mother's presence in week 1 p value<0.001, father's presence in week 1 p<0.001, mother's presence overall and continuous p<0.001, father's presence overall and continuous p<0.001, skin-to-skin contact per day in week 1 |                            |                              |

| Citation                           | QA         | Location                     | Population | Number of patients/hospitals | Patient type        | Type of admission | Level of care | Data that favour single room                                                                                                                                                                                                                                                                                                                                                                         | Data showing no difference                                                                                               | Data that favour shared room |
|------------------------------------|------------|------------------------------|------------|------------------------------|---------------------|-------------------|---------------|------------------------------------------------------------------------------------------------------------------------------------------------------------------------------------------------------------------------------------------------------------------------------------------------------------------------------------------------------------------------------------------------------|--------------------------------------------------------------------------------------------------------------------------|------------------------------|
|                                    |            |                              |            |                              |                     |                   |               | p<0.001, total skin-to-skin contact per day                                                                                                                                                                                                                                                                                                                                                          |                                                                                                                          |                              |
| Van Veenendaal 2022 <sup>138</sup> | 70%        | Netherlands                  | Neonates   | 182 parents, 3 hospitals     | Fathers of neonates | Emergency         | ICU           | p<0.001, p<0.001 <sup>a</sup> , total presence<br>p<0.001, p<0.001 <sup>a</sup> , presence >8 h<br>p<0.001, p=0.009 <sup>a</sup> , total participation<br>p<0.001, p=0.005 <sup>a</sup> , participation in medical care<br>p=0.23, p=0.04 <sup>a</sup> , information gathering<br>p<0.001, p=0.005 <sup>a</sup> , advocacy and leadership<br>p=0.006, p=0.005 <sup>a</sup> , time spent with neonate | p=0.04, p=0.13 <sup>a</sup> , participation in daily care<br>p=0.69, p=0.57 <sup>a</sup> , time spent comforting neonate |                              |
| <b>Evidence synthesis</b>          |            |                              |            |                              |                     |                   |               |                                                                                                                                                                                                                                                                                                                                                                                                      |                                                                                                                          |                              |
| Adamson 2003 <sup>1</sup>          | SLR 82%    | United States, International | Mixed      | Unclear                      | Mixed               | Mixed             | Mixed         | Interaction with family members and flexibility for accommodating family members                                                                                                                                                                                                                                                                                                                     |                                                                                                                          |                              |
| Dowdeswell 2004 <sup>31</sup>      | SLR 36%    | International                | Unclear    | Unclear                      | Mixed               | Mixed             | Mixed         | Qualitative (frequency of visitors, privacy)                                                                                                                                                                                                                                                                                                                                                         |                                                                                                                          |                              |
| OECD WHO 2019 <sup>92</sup>        | Report 14% | Europe                       | NR         | NR                           | Mixed               | Mixed             | Mixed         | p<0.05, social support<br>Communication with family                                                                                                                                                                                                                                                                                                                                                  |                                                                                                                          |                              |



| Citation                        | QA         | Location      | Population | Number of patients/hospitals | Patient type                       | Type of admission | Level of care | Data that favour single room                 | Data showing no difference                        | Data that favour shared room |
|---------------------------------|------------|---------------|------------|------------------------------|------------------------------------|-------------------|---------------|----------------------------------------------|---------------------------------------------------|------------------------------|
| Søndergaard 2022 <sup>118</sup> | SLR<br>91% | International | NR         | NR                           | Acute, Surgical, Internal medicine | Unclear           | Routine       | Quiet, private, better /easier communication |                                                   | Not isolated and not lonely  |
| Taylor 2018 <sup>129</sup>      | SLR<br>91% | International | NR         | NR                           | Mixed                              | Mixed             | Mixed         |                                              | All studies reported advantages and disadvantages |                              |

**Table 11. Summary of studies reporting patient's views on noise, disturbance and sleep**

| Citation                                                                      | QA   | Location       | Population | Number of patients/hospitals                                    | Patient type | Type of admission | Level of care | Data that favour single room                                      | Data showing no difference                                                                                              | Data that favour shared room |
|-------------------------------------------------------------------------------|------|----------------|------------|-----------------------------------------------------------------|--------------|-------------------|---------------|-------------------------------------------------------------------|-------------------------------------------------------------------------------------------------------------------------|------------------------------|
| <b>Before and after a hospital relocation plus Contemporaneous comparison</b> |      |                |            |                                                                 |              |                   |               |                                                                   |                                                                                                                         |                              |
| Maben 2016 <sup>77</sup>                                                      | 67%  | United Kingdom | Unclear    | 32 patients, 21 HCP, 1 hospital relocation, 2 control hospitals | Mixed        | Unclear           | Mixed         | Patient perceptions (comfort, noise levels, privacy)              |                                                                                                                         |                              |
| <b>Before and after a hospital relocation</b>                                 |      |                |            |                                                                 |              |                   |               |                                                                   |                                                                                                                         |                              |
| Carlson 2006 <sup>17</sup>                                                    | 33%  | United States  | Neonates   | Unclear, 1 hospital                                             | Neonates     | Emergency         | ICU           | Patient perceptions (noise levels)                                |                                                                                                                         |                              |
| Carter 2008 <sup>18</sup>                                                     | 33%  | United States  | Neonates   | 53 parents, 1 hospital                                          | Neonates     | Emergency         | NICU          | p<0.001, noise level<br>p<0.001, lighting                         |                                                                                                                         |                              |
| Davis 2019 <sup>25</sup>                                                      | 67%  | Australia      | Adults     | 1569 patients, 1 hospital relocation                            | Orthopaedic  | Elective          | Routine       | <i>Adequate sleep reported but no comparison with shared room</i> |                                                                                                                         |                              |
| Domanico 2010 <sup>28</sup>                                                   | 63%  | United States  | Neonates   | 161 caregivers, 1 hospital, 2 units                             | Paediatric   | NR                | NICU          | Actual noise levels                                               | Patient perceptions (noise levels)<br>p=0.890, noise disturbance (short stay)<br>p=0.657, noise disturbance (long stay) |                              |
| Ferri 2015 <sup>41</sup>                                                      | 100% | Canada         | Adults     | 39 HCPs (13 nurses, 7 respiratory therapists), 5 HCPS (other),  | Unclear      | Unclear           | ICU           | Qualitative (less disruption)                                     |                                                                                                                         |                              |

| Citation                   | QA  | Location       | Population | Number of patients/hospitals                                       | Patient type                 | Type of admission | Level of care | Data that favour single room                                                                                                                                 | Data showing no difference                                            | Data that favour shared room |
|----------------------------|-----|----------------|------------|--------------------------------------------------------------------|------------------------------|-------------------|---------------|--------------------------------------------------------------------------------------------------------------------------------------------------------------|-----------------------------------------------------------------------|------------------------------|
|                            |     |                |            | 6 physicians, 4 family members, 4 support staff, 1 hospital        |                              |                   |               |                                                                                                                                                              |                                                                       |                              |
| Florey 2009 <sup>42</sup>  | 44% | United Kingdom | Adults     | 80 patients, 2 hospitals, 1 Before and after move                  | Medical and surgical, Adults | Unclear           | Routine       | p=0.019, noise disturbance                                                                                                                                   |                                                                       |                              |
| Harris 2004 <sup>49</sup>  | 74% | Canada         | Adults     | 976 patients, 1 hospital, Before and after new unit established    | Pregnancy                    | Maternity         | Routine       | p<0.001, physicians' perceptions of noise                                                                                                                    |                                                                       |                              |
| Janssen 2000 <sup>56</sup> | 56% | Canada         | Adults     | 426 patients, 1 hospital, Before and after relocation              | Pregnant women               | Maternity         | Routine       | p<0.001, any noise disturbance<br>p<0.001, talking/visiting by hospital neighbours<br>p=0.08, staff talking at the nursing station<br>p<0.001, crying babies | p=0.30, talking/visiting by hospital staff<br>p=0.28, women in labour |                              |
| Maben 2015 <sup>76</sup>   | 78% | United Kingdom | Unclear    | 24 staff, 32 patients, 1 hospital (relocated), 2 control hospitals | All patients in hospital     | Mixed             | Mixed         | Patient perceived benefit                                                                                                                                    |                                                                       |                              |
| Milford 2008 <sup>84</sup> | 30% | United States  | Neonates   | Unclear, 1 hospital                                                | Neonates                     | Emergency         | ICU           | Higher staff satisfaction                                                                                                                                    |                                                                       |                              |
| Pyrke 2017 <sup>103</sup>  | 59% | Canada         | Adults     | 47 patients, 1 hospital relocation                                 | Psychiatric                  | Emergency         | Routine       |                                                                                                                                                              | p=0.399, sleep disturbed<br>p=0.065, time spent asleep                |                              |

| Citation                          | QA  | Location      | Population | Number of patients/hospitals                         | Patient type    | Type of admission | Level of care | Data that favour single room                                                                                                                                                                                            | Data showing no difference                                                                                                                                       | Data that favour shared room                                                             |
|-----------------------------------|-----|---------------|------------|------------------------------------------------------|-----------------|-------------------|---------------|-------------------------------------------------------------------------------------------------------------------------------------------------------------------------------------------------------------------------|------------------------------------------------------------------------------------------------------------------------------------------------------------------|------------------------------------------------------------------------------------------|
| Real 2018 <sup>105</sup>          | 56% | United States | Unclear    | 111 patients, 77 nurses, 1 hospital, 1 ward          | Cardio-vascular | Unclear           | ICU, Routine  | Perceived noise level                                                                                                                                                                                                   |                                                                                                                                                                  |                                                                                          |
| Stevens 2011 <sup>121</sup>       | 52% | United States | Neonates   | 147 patients, 1 hospital Before and after relocation | Neonates        | Emergency         | ICU           | Restfulness                                                                                                                                                                                                             |                                                                                                                                                                  |                                                                                          |
| Stevens 2012 <sup>122</sup>       | 44% | United States | Neonates   | 73 patients, 1 hospital Before and after relocation  | Neonates        | Emergency         | ICU           | p<0.001, actual noise level<br>p<0.05, lighting                                                                                                                                                                         | Noise level adjacent to baby's ear                                                                                                                               |                                                                                          |
| Van Enk 2011 <sup>136</sup>       | 44% | United States | Neonates   | 90 beds, 1 hospital                                  | Neonates        | Emergency         | NICU          | p=0.04, actual noise level (day time)<br>p=0.05, less illumination (day time)<br>p=0.01, lower temperature (night time)<br>p=0.001, lower temperature (day and night combined)<br>p<0.0001, lower humidity (night time) | p=0.35, actual noise level (night time)<br>p=0.08, actual noise level (day or night time)<br>p=0.49, illumination (night time)<br>p=0.60, temperature (day time) | p<0.0001, lower humidity (day time)<br>p<0.0001, lower humidity (day and night combined) |
| Walsh 2006 <sup>142</sup>         | 33% | Unclear       | Neonates   | 127 nurses, 1 hospital                               | Neonates        | Emergency         | NICU          | Actual noise levels                                                                                                                                                                                                     |                                                                                                                                                                  |                                                                                          |
| <b>Contemporaneous comparison</b> |     |               |            |                                                      |                 |                   |               |                                                                                                                                                                                                                         |                                                                                                                                                                  |                                                                                          |

| Citation                            | QA  | Location       | Population      | Number of patients/hospitals                   | Patient type                               | Type of admission | Level of care | Data that favour single room                                                                                           | Data showing no difference                                                    | Data that favour shared room                                            |
|-------------------------------------|-----|----------------|-----------------|------------------------------------------------|--------------------------------------------|-------------------|---------------|------------------------------------------------------------------------------------------------------------------------|-------------------------------------------------------------------------------|-------------------------------------------------------------------------|
| Apple 2014 <sup>4</sup>             | 52% | Sweden         | Unclear         | 81 HCP, 3 ICUs                                 | Mixed                                      | Unclear           | ICU           | Qualitative (privacy, fewer disturbances)                                                                              |                                                                               |                                                                         |
| Bevan 2016 <sup>5</sup>             | 59% | United Kingdom | Adults, elderly | 50 patients, 2 hospitals                       | Acute illness                              | Emergency         | Routine       | Qualitative (less noise disturbance)                                                                                   |                                                                               |                                                                         |
| Bodack 2016 <sup>10</sup>           | 56% | Germany        | Neonates        | 35 pairs of parents of 40 neonates, 1 hospital | Neonates                                   | Emergency         | ICU           | Qualitative (fewer disturbances)                                                                                       |                                                                               |                                                                         |
| Deitrick 2010 <sup>26</sup>         | 90% | United States  | Adults          | 24 patients, 29 HCP, 2 hospitals, 2 wards      | Orthopaedic, Neurological, Surgical        | Unclear           | Routine       |                                                                                                                        |                                                                               | Qualitative (adequate rest and sleep due to the presence of a roommate) |
| Douglas 2005 <sup>30</sup>          | 90% | United Kingdom | Unclear         | 785 patients (post discharge), 1 hospital      | Surgical, Acute care, Maternity, Geriatric | Unclear           | Routine       | Fewer night-time disturbances                                                                                          |                                                                               |                                                                         |
| Eberhard-Gran 2000 <sup>33</sup>    | 59% | Norway         | Adults          | 160 patients, Unclear (one municipality)       | Adults, Pregnant women                     | Maternity         | Routine       | More sleep/ rest<br>Enough sleep/ rest (women ≥ 30 years old)<br>OR 8.1, 1.7-39.3 amount of sleep and rest at Akershus | Enough sleep/rest<br>OR 2.9, 0.3-30.3 amount of sleep and rest at Kongsvinger |                                                                         |
| Edéll-Gustafsson 2015 <sup>34</sup> | 90% | Sweden         | Neonates        | 12 parents, 1 unit                             | Neonates                                   | Emergency         | ICU           | Qualitative (privacy, personal control)                                                                                |                                                                               | Qualitative (not confined)                                              |
| Ehrlander 2009 <sup>35</sup>        | 78% | United States  | Adults          | 117 patients, 1 hospital                       | Adults                                     | Unclear           | Routine       | Qualitative (peace and quiet)                                                                                          |                                                                               |                                                                         |

| Citation                    | QA  | Location       | Population      | Number of patients/hospitals                    | Patient type                                          | Type of admission | Level of care | Data that favour single room                                                                                                          | Data showing no difference                                                                                                 | Data that favour shared room               |
|-----------------------------|-----|----------------|-----------------|-------------------------------------------------|-------------------------------------------------------|-------------------|---------------|---------------------------------------------------------------------------------------------------------------------------------------|----------------------------------------------------------------------------------------------------------------------------|--------------------------------------------|
| Foo 2022 <sup>43</sup>      | 74% | Australia      | Adults          | 60 patients, 1 hospital                         | Cardio-respiratory, Obstetric, Sleep disorders, Other | Unclear           | Routine       |                                                                                                                                       | p>0.05, number of interruptions in 24-h<br>p>0.05, number of disturbances at night<br>p=0.11, other measures of discomfort |                                            |
| Harris 2006 <sup>51</sup>   | 52% | United States  | Neonates        | 21 parents, 75 HCPs                             | Neonates                                              | Maternity         | ICU           | Parent satisfaction with physical environment                                                                                         |                                                                                                                            |                                            |
| Hosseini 2017 <sup>52</sup> | 63% | Iran           | Adults          | 132 patients, 2 hospitals                       | Medical, surgical                                     | Unclear           | Routine       |                                                                                                                                       |                                                                                                                            | p<0.001, better scores for sleep disorders |
| Meyer 1994 <sup>83</sup>    | 59% | United States  | Unclear         | Unclear, 1 hospital                             | Mixed                                                 | Mixed             | Mixed         | p<0.05, actual noise levels (day time)<br>p<0.05, actual noise levels (night time)<br>lower maximum illumination (day and night time) | Maximum period of uninterrupted sleep                                                                                      |                                            |
| Morgan 2010 <sup>87</sup>   | 44% | UK, US         | Children        | 146 patients, 114 HCP, 2 hospitals              | Children                                              | Mixed             | Routine       | Qualitative (quiet sleep)                                                                                                             |                                                                                                                            |                                            |
| Nahas 2016 <sup>89</sup>    | 56% | United Kingdom | Adults, Elderly | 60 patients, 2 hospitals                        | Orthopaedic (elective hip/knee arthroplasty)          | Elective          | Routine       | p=0.003, good sleep at night                                                                                                          | p=0.127, noise level                                                                                                       |                                            |
| Nassery 2019 <sup>91</sup>  | 90% | Sweden         | Children        | 13 interviews (9 individual parents, 4 pairs of | Children                                              | Unclear           | Mixed         | Less stress sleeping alone                                                                                                            |                                                                                                                            |                                            |

| Citation                      | QA   | Location       | Population      | Number of patients/hospitals                  | Patient type                | Type of admission | Level of care | Data that favour single room                                           | Data showing no difference                                                            | Data that favour shared room                             |
|-------------------------------|------|----------------|-----------------|-----------------------------------------------|-----------------------------|-------------------|---------------|------------------------------------------------------------------------|---------------------------------------------------------------------------------------|----------------------------------------------------------|
|                               |      |                |                 | parents), 1 hospital                          |                             |                   |               |                                                                        |                                                                                       |                                                          |
| Olson 1992 <sup>93</sup>      | 52%  | United States  | Adults          | 351 patients, 28 HCP, 1 hospital              | Pregnant women              | Maternity         | Routine       | <i>Mothers satisfied with room but no comparison with shared rooms</i> |                                                                                       |                                                          |
| Persson 2012 <sup>97</sup>    | 90%  | Sweden         | Adults, Elderly | 16 patients, 10 nurses<br>1 hospital, 2 wards | Orthopaedic, Surgical       | Unclear           | Routine       | Less disturbance                                                       |                                                                                       |                                                          |
| Persson 2015 <sup>98</sup>    | 90%  | Sweden         | Adults          | 16 patients, 1 hospital                       | Surgical                    | Unclear           | Routine       | Sleep undisturbed                                                      |                                                                                       |                                                          |
| Poncette 2021 <sup>101</sup>  | 56%  | Germany        | Unclear         | 21 beds, 1 hospital                           | Unclear                     | Unclear           | ICU           |                                                                        |                                                                                       | Less alarms raised                                       |
| Rowlands 2008 <sup>110</sup>  | 90%  | United Kingdom | Adults          | 12 patients, 1 hospital                       | Adults with advanced cancer | Unclear           | Routine       | Qualitative (less stress related to disturbing others)                 |                                                                                       |                                                          |
| Sakr 2021 <sup>113</sup>      | 74%  | Lebanon        | Adults          | 75 patients, 1 hospital                       | Internal medicine, Surgical | Mixed             | Routine       | p=0.011, fewer cases of new onset insomnia                             | p=0.272, patient perceived impact of room on new onset insomnia                       |                                                          |
| Stelwagen 2021 <sup>120</sup> | 100% | Netherlands    | Neonates        | 36 parents, 1 hospital                        | Neonates                    | Emergency         | ICU           | Qualitative (privacy)                                                  |                                                                                       | Qualitative (less surprise when staff appear at bedside) |
| Tegnstedt 2013 <sup>130</sup> | 70%  | Sweden         | Adults, Elderly | 15 patients<br>1 hospital                     | Adults                      | Emergency         | ICU           |                                                                        | p=0.777 (7am to 3pm),<br>p=0.885(3pm to 11pm), p=0.832 (11pm to 7am),<br>actual noise |                                                          |

| Citation                        | QA            | Location      | Population   | Number of patients/<br>hospitals | Patient type                       | Type of admission | Level of care | Data that favour single room                      | Data showing no difference       | Data that favour shared room       |
|---------------------------------|---------------|---------------|--------------|----------------------------------|------------------------------------|-------------------|---------------|---------------------------------------------------|----------------------------------|------------------------------------|
| Zaal 2013 <sup>145</sup>        | 67%           | Netherlands   | Older Adults | 156 patients<br>1 hospital       | Older Adults with dementia         | Mixed             | ICU           |                                                   |                                  | p < 0.001<br>lower light intensity |
| <b>Evidence synthesis</b>       |               |               |              |                                  |                                    |                   |               |                                                   |                                  |                                    |
| Dowdeswell 2004 <sup>31</sup>   | SLR<br>36%    | International | Unclear      | Unclear                          | Mixed                              | Mixed             | Mixed         | Quieter (less sleep disturbance, better outcomes) |                                  |                                    |
| OECD WHO 2019 <sup>92</sup>     | Report<br>14% | Europe        | NR           | NR                               | Mixed                              | Mixed             | Mixed         | p < 0.05, better sleep                            |                                  |                                    |
| Søndergaard 2022 <sup>118</sup> | SLR<br>91%    | International | NR           | NR                               | Acute, Surgical, Internal medicine | Unclear           | Routine       | Quieter (less sleep disturbance)                  |                                  |                                    |
| Taylor 2018 <sup>129</sup>      | SLR<br>91%    | International | NR           | NR                               | Mixed                              | Mixed             | Mixed         |                                                   | Mixed findings on sleep outcomes |                                    |



**Table 12. Summary of studies reporting patients' views on satisfaction with care**

| Citation                                                                      | QA  | Location       | Population | Number of patients/hospitals                                    | Patient type                 | Type of admission | Level of care | Data that favour single room                                                                 | Data showing no difference                                   | Data that favour shared room                                   |
|-------------------------------------------------------------------------------|-----|----------------|------------|-----------------------------------------------------------------|------------------------------|-------------------|---------------|----------------------------------------------------------------------------------------------|--------------------------------------------------------------|----------------------------------------------------------------|
| <b>Before and after a hospital relocation plus Contemporaneous comparison</b> |     |                |            |                                                                 |                              |                   |               |                                                                                              |                                                              |                                                                |
| Maben 2016 <sup>77</sup>                                                      | 67% | United Kingdom | Unclear    | 32 patients, 21 HCP, 1 hospital relocation, 2 control hospitals | Mixed                        | Unclear           | Mixed         | Patient preference (privacy, ensuite)                                                        |                                                              | Patient preference (social interaction)                        |
| <b>Before and after a hospital relocation</b>                                 |     |                |            |                                                                 |                              |                   |               |                                                                                              |                                                              |                                                                |
| Campbell-Yeo 2021 <sup>15</sup>                                               | 74% | Canada         | Neonates   | 71 mothers, 2 wards                                             | Neonates                     | Emergency         | ICU           | Postpartum depression scores<br>Post-traumatic stress disorder scores                        | Parental stressor scores<br>EQ-5D-5L self-reported health    | Perceived maternal self-efficacy<br>Intolerance of uncertainty |
| Carlson 2006 <sup>17</sup>                                                    | 33% | United States  | Neonates   | 1 hospital, Patients unclear                                    | Neonates                     | Emergency         | ICU           | Patient perception (improved lighting control)                                               |                                                              |                                                                |
| Carter 2008 <sup>18</sup>                                                     | 33% | United States  | Neonates   | 53 parents, 1 hospital Before and after relocation              | Neonates                     | Emergency         | NICU          | p<0.001 parent perceptions of security                                                       |                                                              |                                                                |
| Davis 2019 <sup>25</sup>                                                      | 67% | Australia      | Adults     | 1569 patients, 1 hospital relocation                            | Orthopaedic                  | Elective          | Routine       | Patient satisfaction but no comparison with shared room                                      |                                                              |                                                                |
| Florey 2009 <sup>42</sup>                                                     | 44% | United Kingdom | Adults     | 80 patients, 2 hospitals, 1 Before and after move               | Medical and surgical, Adults | Unclear           | Routine       |                                                                                              | patient preference based on previous experience inconclusive |                                                                |
| Janssen 2000 <sup>56</sup>                                                    | 56% | Canada         | Adults     | 426 patients, 1 hospital                                        | Pregnant women               | Maternity         | Routine       | p<0.001, patient opinions in care considered<br>p<0.001, information given to inform choices |                                                              |                                                                |

| Citation                     | QA  | Location    | Population | Number of patients/hospitals                             | Patient type                 | Type of admission | Level of care | Data that favour single room                                                                                                                                                                                                  | Data showing no difference                                                                                                                                                                                              | Data that favour shared room |
|------------------------------|-----|-------------|------------|----------------------------------------------------------|------------------------------|-------------------|---------------|-------------------------------------------------------------------------------------------------------------------------------------------------------------------------------------------------------------------------------|-------------------------------------------------------------------------------------------------------------------------------------------------------------------------------------------------------------------------|------------------------------|
|                              |     |             |            |                                                          |                              |                   |               | <p>p&lt;0.001, patient choices supporter by caregivers</p> <p>p&lt;0.001, assistance given to support person</p> <p>p&lt;0.001, comfort measures for labour pain</p> <p>p&lt;0.001, comfort measures for pain after birth</p> |                                                                                                                                                                                                                         |                              |
| Jongerden 2013 <sup>59</sup> | 67% | Netherlands | Adults     | 387 patients, 323 completed surveys, 1 hospital          | Mixed, Adults                | Mixed             | ICU           | <p>p=0.02, overall family satisfaction</p> <p>p=0.007, family satisfaction with care</p> <p>p=0.02, overall patient satisfaction</p> <p>p=0.01, patient satisfaction with care</p>                                            | <p>p=0.12, family satisfaction with decision making</p> <p>p=0.21, patient satisfaction with decision making</p>                                                                                                        |                              |
| Kainiemi 2021 <sup>63</sup>  | 59% | Finland     | Neonates   | 61 families, 1 hospital, 1 unit (pre-post-restructuring) | Pre-term infants (<35 weeks) | Unclear           | NICU          |                                                                                                                                                                                                                               | <p>Patient perceptions: (mothers and fathers, respectively)</p> <p>p=0.19, p=0.33, overall scores</p> <p>p=0.11, p=0.94, extent staff listen to mothers/fathers</p> <p>p=0.24, p=0.18, participation in baby's care</p> |                              |



| Citation                  | QA  | Location       | Population | Number of patients/hospitals       | Patient type                | Type of admission | Level of care | Data that favour single room                                                                                            | Data showing no difference                                                                                                                                                                                                                                                                                                                                                                                 | Data that favour shared room |
|---------------------------|-----|----------------|------------|------------------------------------|-----------------------------|-------------------|---------------|-------------------------------------------------------------------------------------------------------------------------|------------------------------------------------------------------------------------------------------------------------------------------------------------------------------------------------------------------------------------------------------------------------------------------------------------------------------------------------------------------------------------------------------------|------------------------------|
|                           |     |                |            |                                    |                             |                   |               |                                                                                                                         | p=0.09, p=0.45, guidance provided by staff met needs p=0.71, p=0.16, opinion considered regarding care of baby p=0.51, p=0.16, mothers/fathers trust in staff caring for baby p=0.28, p=0.92, staff trust in mothers/fathers caring for baby p=0.12, p=0.89, participation in discussions during rounds p=0.51, p=0.41, information given by staff met needs p=0.70, p=0.87, staff offer emotional support |                              |
| Lawson 2000 <sup>69</sup> | 41% | United Kingdom | Adults     | 424 patients, 2 hospitals, 4 wards | Psychiatric and Orthopaedic | Unclear           | Routine       | Patient perceptions (spatially, visually)                                                                               |                                                                                                                                                                                                                                                                                                                                                                                                            |                              |
| Lester 2014 <sup>72</sup> | 63% | United States  | Neonates   | 403 patients, 1 hospital           | Neonates                    | Emergency         | ICU           | p<0.001, mother's overall satisfaction p<0.0001, mother's stress p<0.001 mother's satisfaction with family-centred care |                                                                                                                                                                                                                                                                                                                                                                                                            |                              |

| Citation                    | QA  | Location       | Population       | Number of patients/hospitals                | Patient type    | Type of admission | Level of care | Data that favour single room                                                                                                                                                   | Data showing no difference | Data that favour shared room |
|-----------------------------|-----|----------------|------------------|---------------------------------------------|-----------------|-------------------|---------------|--------------------------------------------------------------------------------------------------------------------------------------------------------------------------------|----------------------------|------------------------------|
|                             |     |                |                  |                                             |                 |                   |               | p<0.0001 mother's involvement in infant care                                                                                                                                   |                            |                              |
| Milford 2008 <sup>84</sup>  | 30% | United States  | Neonates         | No. of patients unclear, 1 hospital         | Neonates        | Emergency         | ICU           | Positive staff perceptions                                                                                                                                                     |                            |                              |
| Real 2018 <sup>105</sup>    | 56% | United States  | Unclear          | 111 patients, 77 nurses, 1 hospital, 1 ward | Cardio-vascular | Unclear           | ICU, Routine  | p<0.05, patients' satisfaction with design                                                                                                                                     |                            |                              |
| Reid 2015 <sup>107</sup>    | 48% | United Kingdom | Adult, Elderly   | 89 patients, 1 hospital relocation          | Geriatric       | Rehabilitation    | Routine       | 100% patients prefer private toilet<br><i>84.8% of patients in single rooms would prefer single rooms</i><br><i>37.2% of patients in shared room would prefer single rooms</i> |                            |                              |
| Stevens 2011 <sup>121</sup> | 52% | United States  | Neonates         | 147 patients, 1 hospital                    | Neonates        | Emergency         | ICU           | p<0.001, parent satisfaction with environment<br>p=0.018, overall parent satisfaction<br>p=0.04, total parent satisfaction score                                               |                            |                              |
| Swanson 2013 <sup>125</sup> | 37% | United States  | Neonates, Carers | 55 parents, 1 hospital                      | Neonates        | Emergency         | NICU          | p<0.05, nurse perception of facilities<br>p<0.05, practitioners' perceptions of facilities                                                                                     |                            |                              |

| Citation                          | QA  | Location       | Population      | Number of patients/hospitals                 | Patient type                               | Type of admission | Level of care | Data that favour single room                                                                                | Data showing no difference                                                           | Data that favour shared room |
|-----------------------------------|-----|----------------|-----------------|----------------------------------------------|--------------------------------------------|-------------------|---------------|-------------------------------------------------------------------------------------------------------------|--------------------------------------------------------------------------------------|------------------------------|
|                                   |     |                |                 |                                              |                                            |                   |               | p<0.05, parents' perceptions of facilities                                                                  |                                                                                      |                              |
| <b>Contemporaneous comparison</b> |     |                |                 |                                              |                                            |                   |               |                                                                                                             |                                                                                      |                              |
| Bevan 2016 <sup>5</sup>           | 59% | United Kingdom | Adults, Elderly | 50 patients, 2 hospitals                     | Acute illness                              | Emergency         | Routine       | Qualitative (privacy, personal control, private toilet)<br>p=0.038, patients perceived a high-level of care |                                                                                      |                              |
| Boztepe 2017 <sup>12</sup>        | 63% | Turkey         | Children        | 130 patients, 1 hospital, 1 ward             | Children                                   | Mixed             | Routine       |                                                                                                             | Only 15.4% expected a large or single room                                           |                              |
| Deitrick 2010 <sup>26</sup>       | 90% | United States  | Adults          | 24 patients, 29 HCP, 2 hospitals, 2 wards    | Orthopaedic, Neurological, Surgical        | Unclear           | Routine       | Patient preference (privacy)                                                                                |                                                                                      |                              |
| de Matos 2020 <sup>27</sup>       | 63% | Brazil         | Unclear         | 176 family visitors, 1 hospital, 4 ICU units | Cancer                                     | Unclear           | ICU           | p=0.02, patient satisfaction<br>Satisfaction of family members                                              |                                                                                      |                              |
| Douglas 2005 <sup>30</sup>        | 90% | United Kingdom | Unclear         | 785 patients (post discharge), 1 hospital    | Surgical, Acute care, Maternity, Geriatric | Unclear           | Routine       | Patient satisfaction with needs met                                                                         |                                                                                      |                              |
| Eberhard-Gran 2000 <sup>33</sup>  | 59% | Norway         | Adults          | 160 patients, Unclear (one municipality)     | Adults, Pregnant women                     | Maternity         | Routine       | OR <sup>a</sup> 18, 2.2-149.1 more likely to be satisfied with care                                         | Satisfaction with rooms<br>Satisfaction with sleep and rest<br>Satisfaction with LOS |                              |
| Ehrlander 2009 <sup>35</sup>      | 78% | United States  | Adults          | 117 patients, 1 hospital                     | Adults                                     | Unclear           | Routine       | Patient preference                                                                                          | p=0.309, fear of dying                                                               |                              |

| Citation                    | QA  | Location      | Population       | Number of patients/hospitals                         | Patient type      | Type of admission | Level of care | Data that favour single room                                                                                                                     | Data showing no difference                                                                                                      | Data that favour shared room |
|-----------------------------|-----|---------------|------------------|------------------------------------------------------|-------------------|-------------------|---------------|--------------------------------------------------------------------------------------------------------------------------------------------------|---------------------------------------------------------------------------------------------------------------------------------|------------------------------|
| Erdeve 2009 <sup>37</sup>   | 78% | Turkey        | Adults, Neonates | 60 infants, 49 mothers, 2 hospitals                  | Preterm neonates  | Emergency         | NICU          |                                                                                                                                                  | p=0.206, depression scores p=0.06, postpartum depression rate p=0.161, vulnerable child scores p=0.219, parenting stress scores |                              |
| Harris 2006 <sup>50</sup>   | 63% | United States | Neonates         | 75 HCP, 21 parents, 5 NICU units (SFR=2, open bay=3) | Neonates          | Unclear           | Level 3, NICU | p<0.05, window view and proximity to infant during sleep<br>Less stressful and less depressing                                                   |                                                                                                                                 |                              |
| Harris 2006 <sup>51</sup>   | 52% | United States | Neonates         | 21 parents, 75 HCPs                                  | Neonates          | Maternity         | ICU           | Less stressful and less depressing, better physical environment.                                                                                 |                                                                                                                                 |                              |
| Hosseini 2017 <sup>52</sup> | 63% | Iran          | Adults           | 132 patients, 2 hospitals                            | Medical, Surgical | Unclear           | Routine       | p<0.001, patients' overall satisfaction<br>p<0.001, patients' total satisfaction                                                                 |                                                                                                                                 |                              |
| Janssen 2006 <sup>57</sup>  | 59% | Canada        | Adults           | 415 patients, 1 hospital, 2 wards                    | Pregnant women    | Maternity         | Routine       | p<0.001, patients' overall satisfaction<br>p<0.001, confidence in neonatal care<br>p<0.001, provision of choice<br>p<0.001, physical environment |                                                                                                                                 |                              |
| Labarère 2004 <sup>68</sup> | 70% | France        | Adults           | 4095 patients, 1 hospital                            | Mixed             | Mixed             | Mixed         | p<0.01, overall patient experience                                                                                                               |                                                                                                                                 |                              |

| Citation                   | QA  | Location       | Population          | Number of patients/hospitals                    | Patient type                                 | Type of admission | Level of care | Data that favour single room                                                                                                                                                                                                                                                                                | Data showing no difference                                     | Data that favour shared room                                                                                                                                                                                                                                             |
|----------------------------|-----|----------------|---------------------|-------------------------------------------------|----------------------------------------------|-------------------|---------------|-------------------------------------------------------------------------------------------------------------------------------------------------------------------------------------------------------------------------------------------------------------------------------------------------------------|----------------------------------------------------------------|--------------------------------------------------------------------------------------------------------------------------------------------------------------------------------------------------------------------------------------------------------------------------|
| Miller 1998 <sup>85</sup>  | 59% | United States  | Adolescents, Adults | 94 patients, 1 hospital                         | Inpatients, Outpatients                      | Unclear           | Routine       | % patients overall stating ideal rooming arrangements<br>% inpatients stating ideal rooming arrangements<br>% female inpatients stating ideal rooming arrangements<br>% inpatients aged 15 to 17 and 18 to 21 stating ideal rooming arrangements<br>% female outpatients stating ideal rooming arrangements | % outpatients aged 12 to 14 stating ideal rooming arrangements | % male inpatients and outpatients stating ideal rooming arrangements<br>% inpatients aged 12 to 14 stating ideal rooming arrangements<br>% outpatients stating ideal rooming arrangements<br>% outpatients aged 15 to 17 and 18 to 21 stating ideal rooming arrangements |
| Morgan 2010 <sup>87</sup>  | 44% | UK, US         | Children            | 146 patients, 114 HCP, 2 hospitals              | Children                                     | Mixed             | Routine       |                                                                                                                                                                                                                                                                                                             |                                                                | % patient preference                                                                                                                                                                                                                                                     |
| Nahas 2016 <sup>89</sup>   | 56% | United Kingdom | Adults, Elderly     | 60 patients, 2 hospitals                        | Orthopaedic (elective hip/knee arthroplasty) | Elective          | Routine       | $p=0.014$ , feeling of safety<br>Qualitative (privacy, security, pain management, cleanliness)                                                                                                                                                                                                              | $p=0.061$ , overall patient satisfaction                       |                                                                                                                                                                                                                                                                          |
| Nash 2021 <sup>90</sup>    | 63% | Australia      | Adults              | 602 patients, 4 hospitals                       | Unclear                                      | Unclear           | Routine       |                                                                                                                                                                                                                                                                                                             |                                                                | Patient preference                                                                                                                                                                                                                                                       |
| Nassery 2019 <sup>91</sup> | 90% | Sweden         | Children            | 13 interviews (9 individual parents, 4 pairs of | Children                                     | Unclear           | Mixed         | Parents preference                                                                                                                                                                                                                                                                                          |                                                                |                                                                                                                                                                                                                                                                          |

| Citation                   | QA  | Location       | Population      | Number of patients/hospitals                | Patient type                           | Type of admission  | Level of care | Data that favour single room                   | Data showing no difference                                                                                                                                                                                                            | Data that favour shared room                  |
|----------------------------|-----|----------------|-----------------|---------------------------------------------|----------------------------------------|--------------------|---------------|------------------------------------------------|---------------------------------------------------------------------------------------------------------------------------------------------------------------------------------------------------------------------------------------|-----------------------------------------------|
|                            |     |                |                 | parents), 1 hospital                        |                                        |                    |               |                                                |                                                                                                                                                                                                                                       |                                               |
| Olson 1992 <sup>93</sup>   | 52% | United States  | Adults          | 351 patients, 28 HCP, 1 hospital            | Pregnant women                         | Maternity          | Routine       | Nurse preference<br><i>Mother satisfaction</i> |                                                                                                                                                                                                                                       |                                               |
| Pease 2002 <sup>96</sup>   | 48% | United Kingdom | Unclear         | 50 patients, 1 hospital                     | Oncologic, Terminal                    | Unclear            | Routine       | Family preference                              |                                                                                                                                                                                                                                       | Patient preference                            |
| Persson 2012 <sup>97</sup> | 90% | Sweden         | Adults, Elderly | 16 patients, 10 nurses, 1 hospital, 2 wards | Orthopaedic, Surgical                  | Unclear            | Routine       |                                                |                                                                                                                                                                                                                                       | Qualitative (security and safety)             |
| Persson 2015 <sup>98</sup> | 90% | Sweden         | Adults          | 16 patients, 1 hospital                     | Surgical                               | Unclear            | Routine       |                                                |                                                                                                                                                                                                                                       | Qualitative (security, company, not isolated) |
| Pineda 2012 <sup>100</sup> | 70% | United States  | Neonates        | 81 patients, 1 hospital                     | Premature neonates                     | Emergency          | NICU          |                                                | p=0.512, maternal depression<br>p=0.152, trait anxiety<br>p=0.830, state anxiety<br>p=0.071, life stress<br>p=0.603, avoidance coping<br>p=0.967, emotion-oriented coping<br>p=0.506, task-oriented coping<br>p=0.951, social support | p=0.040 <sup>a</sup> , stress levels          |
| Roos 2020 <sup>108</sup>   | 90% | Norway         | Adults          | 39 patients, 1 hospital relocation          | Internal medicine, Surgical, Maternity | Maternity, Unclear | Routine       |                                                |                                                                                                                                                                                                                                       | Satisfaction for older/bedridden patients     |



| Citation                      | QA   | Location       | Population | Number of patients/hospitals                       | Patient type                | Type of admission | Level of care | Data that favour single room                                                                                                                                                                                                                                                                                                                                | Data showing no difference                                                                                                                                                                                                                                                                                                                                                                                    | Data that favour shared room |
|-------------------------------|------|----------------|------------|----------------------------------------------------|-----------------------------|-------------------|---------------|-------------------------------------------------------------------------------------------------------------------------------------------------------------------------------------------------------------------------------------------------------------------------------------------------------------------------------------------------------------|---------------------------------------------------------------------------------------------------------------------------------------------------------------------------------------------------------------------------------------------------------------------------------------------------------------------------------------------------------------------------------------------------------------|------------------------------|
| Rowlands 2008 <sup>110</sup>  | 90%  | United Kingdom | Adults     | 12 patients, 1 hospital                            | Adults with advanced cancer | Unclear           | Routine       |                                                                                                                                                                                                                                                                                                                                                             | Qualitative (desire for choice of room)                                                                                                                                                                                                                                                                                                                                                                       |                              |
| Stelwagen 2021 <sup>120</sup> | 100% | Netherlands    | Neonates   | 36 parents, 1 hospital Before and after relocation | Neonates                    | Emergency         | ICU           | Qualitative (privacy, safety, homeliness, feelings of central engagement with child care)                                                                                                                                                                                                                                                                   |                                                                                                                                                                                                                                                                                                                                                                                                               |                              |
| Tandberg 2019 <sup>127</sup>  | 67%  | Norway         | Infants    | 77 infants, 132 parents, 2 hospitals               | Infants                     | Emergency         | ICU           | <p>Mothers:<br/>p=0.005, depression at day 14<br/>p=0.04, anxiety at day 14<br/>p=0.0001, role alteration at day 14<br/>p=0.06, role alteration at discharge</p> <p>Fathers:<br/>p=0.06, environmental stress at day 14<br/>p=0.003, role alteration at day 14<br/>p=0.003, environmental stress at discharge<br/>p=0.004, role alteration at discharge</p> | <p>Mothers:<br/>p=0.12<br/>Maternal distress at day 14<br/>p=0.43 depression, and p=0.48, anxiety at discharge<br/>p=0.13, distress at discharge<br/>p=0.65, depression and p=0.54, anxiety at 4-month corrected age<br/>p=0.60, distress at 4-month corrected age<br/>p=0.62, dysfunctional interaction with child<br/>p=0.23, perceived child to be difficult<br/>p=0.42, stress<br/>p=0.51, attachment</p> |                              |



| Citation                           | QA  | Location    | Population | Number of patients/hospitals | Patient type        | Type of admission | Level of care | Data that favour single room                                                                                                                        | Data showing no difference                                                                                                                                                                                                                                                                           | Data that favour shared room |
|------------------------------------|-----|-------------|------------|------------------------------|---------------------|-------------------|---------------|-----------------------------------------------------------------------------------------------------------------------------------------------------|------------------------------------------------------------------------------------------------------------------------------------------------------------------------------------------------------------------------------------------------------------------------------------------------------|------------------------------|
|                                    |     |             |            |                              |                     |                   |               |                                                                                                                                                     | Fathers: p=0.17, depression and p=0.25, anxiety at day 14 p=0.57, depression and p=0.73, anxiety at discharge p=0.92, depression and p=0.11, anxiety at 4-month corrected age p=0.16, dysfunctional interaction with child p=0.77, perceived child to be difficult p=0.68, stress p=0.49, attachment |                              |
| Van Veenendaal 2022 <sup>138</sup> | 70% | Netherlands | Neonates   | 182 parents, 3 hospitals     | Fathers of neonates | Emergency         | ICU           | p=0.001 <sup>a</sup> , stress overall p=0.011 <sup>a</sup> , stress related to environment p<0.001 <sup>a</sup> , stress related to role alteration | p=0.83 <sup>a</sup> , depression and anxiety p=0.26 <sup>a</sup> , self-efficacy p=0.27 <sup>a</sup> , impaired parent-newborn bonding p=0.32, satisfaction with care                                                                                                                                |                              |
| Watson 2014 <sup>144</sup>         | 44% | Canada      | Neonates   | 85 families, 1 hospital      | Neonates            | Emergency         | NICU          | p=0.008, privacy p=0.0001, comfort p=0.009, interaction with other families                                                                         | p=0.05, getting to know baby p=0.05, feeling irritable, anxious, depressed or sad                                                                                                                                                                                                                    |                              |

| Citation                          | QA         | Location      | Population | Number of patients/hospitals | Patient type                             | Type of admission | Level of care | Data that favour single room                                                                                        | Data showing no difference                            | Data that favour shared room                                             |
|-----------------------------------|------------|---------------|------------|------------------------------|------------------------------------------|-------------------|---------------|---------------------------------------------------------------------------------------------------------------------|-------------------------------------------------------|--------------------------------------------------------------------------|
|                                   |            |               |            |                              |                                          |                   |               | p=0.04. confidence feeding baby<br>p=0.04, easy to comfort baby<br>p=0.003, family adjusted to having the baby home | p=0.05, satisfied with care baby received             |                                                                          |
| <b>Economic analysis</b>          |            |               |            |                              |                                          |                   |               |                                                                                                                     |                                                       |                                                                          |
| Boardman 2011 <sup>8</sup>        | 91%        | Canada        | Unclear    | 537 beds, 1 hospital         | Mixed                                    | Mixed             | Mixed         | Patients and willingness to pay for single over shared rooms                                                        |                                                       |                                                                          |
| <b>Evidence synthesis</b>         |            |               |            |                              |                                          |                   |               |                                                                                                                     |                                                       |                                                                          |
| Bradbury-Jones 2013 <sup>14</sup> | SLR 86%    | International | Adults     | NR                           | Mixed, Vulnerable, Learning difficulties | Unclear           | Unclear       |                                                                                                                     | Mixed views among patients with learning disabilities |                                                                          |
| Dowdeswell 2004 <sup>31</sup>     | SLR 36%    | International | Unclear    | Unclear                      | Mixed                                    | Mixed             | Mixed         | Quicker mobility recovery<br>Sense of self-reliance<br>Personal control leads to happier patients.                  |                                                       |                                                                          |
| OECD WHO 2019 <sup>92</sup>       | Report 14% | Europe        | NR         | NR                           | Mixed                                    | Mixed             | Mixed         | 12 studies showed single rooms positively affect patient satisfaction                                               | 4 studies showed no difference                        | 1 study showed single rooms don't positively affect patient satisfaction |
| Søndergaard 2022 <sup>118</sup>   | SLR 91%    | International | NR         | NR                           | Acute, Surgical, Internal medicine       | Unclear           | Routine       |                                                                                                                     |                                                       | Communication and interaction with kindred spirits was appreciated       |



| Citation                   | QA      | Location      | Population | Number of patients/hospitals | Patient type | Type of admission | Level of care | Data that favour single room                                                                                                                                          | Data showing no difference                                                                                                                                                  | Data that favour shared room                                      |
|----------------------------|---------|---------------|------------|------------------------------|--------------|-------------------|---------------|-----------------------------------------------------------------------------------------------------------------------------------------------------------------------|-----------------------------------------------------------------------------------------------------------------------------------------------------------------------------|-------------------------------------------------------------------|
|                            |         |               |            |                              |              |                   |               |                                                                                                                                                                       |                                                                                                                                                                             | Bedridden / older patients were less satisfied with single rooms. |
| Taylor 2018 <sup>129</sup> | SLR 91% | International | NR         | NR                           | Mixed        | Mixed             | Mixed         | Patient perceptions of dignity                                                                                                                                        |                                                                                                                                                                             |                                                                   |
| Voigt 2018 <sup>141</sup>  | SLR 86% | International | NR         | NR                           | NR           | Unclear           | Routine       | 1 study found advantages for feelings of safety<br>1 study found advantages for patient preference<br>1 study found advantage or no difference for patient preference | 1 study found mixed findings for feelings of safety<br>All studies found mixed findings regarding concern for others<br>1 study found mixed findings for patient preference |                                                                   |

For peer review only

**Table 13. Summary of studies reporting data on patient monitoring and safeguarding**

| Citation                                                                      | QA   | Location       | Population      | Number of patients/hospitals                                    | Patient type                                  | Type of admission | Level of care | Data that favour single room    | Data showing no difference                                   | Data that favour shared room                                                                                   |
|-------------------------------------------------------------------------------|------|----------------|-----------------|-----------------------------------------------------------------|-----------------------------------------------|-------------------|---------------|---------------------------------|--------------------------------------------------------------|----------------------------------------------------------------------------------------------------------------|
| <b>Before and after a hospital relocation plus Contemporaneous comparison</b> |      |                |                 |                                                                 |                                               |                   |               |                                 |                                                              |                                                                                                                |
| Maben 2016 <sup>77</sup>                                                      | 67%  | United Kingdom | Unclear         | 32 patients, 21 HCP, 1 hospital relocation, 2 control hospitals | Mixed                                         | Unclear           | Mixed         |                                 | <i>Qualitative (regular visits by staff to single-rooms)</i> |                                                                                                                |
| <b>Before and after a hospital relocation</b>                                 |      |                |                 |                                                                 |                                               |                   |               |                                 |                                                              |                                                                                                                |
| Real 2018 <sup>105</sup>                                                      | 56%  | United States  | Unclear         | 111 patients, 77 nurses, 1 hospital, 1 ward                     | Cardio-vascular                               | Unclear           | ICU, Routine  |                                 | Staffing ratio                                               |                                                                                                                |
| Jansen 2021 <sup>55</sup>                                                     | 63%  | Netherlands    | Neonates        | 712 patients 1 hospital, 2 units                                | Premature neonates                            | Maternity care    | NICU          |                                 | Nurse-to-patient ratio                                       |                                                                                                                |
| Jones 2016 <sup>58</sup>                                                      | 100% | Australia      | Neonates        | 66 mothers, 51 nurses, 1 hospital relocation                    | Adults, Mothers of premature neonates, Nurses | Maternity         | NICU          |                                 |                                                              | Nurse perception (parallel patient interactions, get caught in single rooms so can't attend to other families) |
| Jung 2022 <sup>62</sup>                                                       | 67%  | South Korea    | Adults          | 901 patients, 1 hospital                                        | Mixed                                         | Unclear           | ICU           |                                 | Nurse-to-patient ratio                                       |                                                                                                                |
| <b>Contemporaneous comparison</b>                                             |      |                |                 |                                                                 |                                               |                   |               |                                 |                                                              |                                                                                                                |
| Bevan 2016 <sup>5</sup>                                                       | 59%  | United Kingdom | Adults, Elderly | 50 patients, 2 hospitals                                        | Acute medical illness                         | Emergency         | Routine       | Patient perceptions (isolation) |                                                              |                                                                                                                |
| Bodack 2016 <sup>10</sup>                                                     | 55%  | Germany        | Neonates        | 35 pairs of parents                                             | Premature neonates                            | Maternity care    | NICU          | Somewhat less frequent          |                                                              |                                                                                                                |



| Citation                                         | QA  | Location       | Population      | Number of patients/hospitals                                                    | Patient type                                 | Type of admission | Level of care | Data that favour single room                                             | Data showing no difference     | Data that favour shared room |
|--------------------------------------------------|-----|----------------|-----------------|---------------------------------------------------------------------------------|----------------------------------------------|-------------------|---------------|--------------------------------------------------------------------------|--------------------------------|------------------------------|
|                                                  |     |                |                 |                                                                                 |                                              |                   |               | adequate monitoring                                                      |                                |                              |
| Bracco 2007 <sup>13</sup>                        | 74% | Canada         | Adults          | 2522 patients (of whom 207 known MRS carriers at admission), 1 hospital, 1 ward | Mixed, Post surgery, Medical admission       | Mixed             | ICU           | Standard nurse-to-patient ratio 1:2                                      |                                |                              |
| Ehrlander 2009 <sup>35</sup>                     | 78% | United States  | Adults          | 117 patients, 1 hospital                                                        | Mixed                                        | Unclear           | Routine       | p=0.025, patient perception of nurse availability                        |                                |                              |
| Deitrick 2010 <sup>26</sup>                      | 90% | United States  | Adults          | 24 patients, 29 HCP, 2 hospitals, 2 wards                                       | Orthopaedic, Neurological, Surgical          | Unclear           | Routine       | Better response to call lights. More visits to anticipate patient needs. |                                |                              |
| Hosseini 2017 <sup>52</sup>                      | 63% | Iran           | Adults          | 132 patients, 2 hospitals                                                       | Medical, Surgical                            | Unclear           | Routine       | p=0.19, access to nurses                                                 |                                |                              |
| Julian 2015 <sup>61</sup>                        | 78% | United States  | Neonates        | 1823 patients 1 hospital, 1 unit                                                | Neonates                                     | Mixed             | NICU          |                                                                          | Nurse-to-patient ratio         |                              |
| Nahas 2016 <sup>89</sup>                         | 56% | United Kingdom | Adults, Elderly | 60 patients, 2 hospitals                                                        | Orthopaedic (elective hip/knee arthroplasty) | Elective          | Routine       |                                                                          | p=0.244, response to call bell |                              |
| <b>Early vs late response to new unit design</b> |     |                |                 |                                                                                 |                                              |                   |               |                                                                          |                                |                              |



| Citation                 | QA   | Location | Population | Number of patients/hospitals                                                                                                               | Patient type | Type of admission | Level of care | Data that favour single room               | Data showing no difference | Data that favour shared room                                                             |
|--------------------------|------|----------|------------|--------------------------------------------------------------------------------------------------------------------------------------------|--------------|-------------------|---------------|--------------------------------------------|----------------------------|------------------------------------------------------------------------------------------|
| Ferri 2015 <sup>41</sup> | 100% | Canada   | Adults     | 39 HCPs, of which 13 nurses, 7 respiratory therapists, 5 HCPS (other), 6 physicians, 4 family members, 4 support staff, 1 hospital, 1 unit | Unclear      | Unclear           | ICU           | 75 negative comments on shared-room design |                            | Qualitative (less safety concerns related to distance between patient and care provider) |

Peer review only

**Table 14. Summary of studies reporting views on patient confidentiality**

| Citation                                                                      | QA   | Location       | Population | Number of patients/hospitals                                                                                                      | Patient type                                  | Type of admission | Level of care | Data that favour single room                                          | Data showing no difference                | Data that favour shared room |
|-------------------------------------------------------------------------------|------|----------------|------------|-----------------------------------------------------------------------------------------------------------------------------------|-----------------------------------------------|-------------------|---------------|-----------------------------------------------------------------------|-------------------------------------------|------------------------------|
| <b>Before and after a hospital relocation plus Contemporaneous comparison</b> |      |                |            |                                                                                                                                   |                                               |                   |               |                                                                       |                                           |                              |
| Maben 2016 <sup>77</sup>                                                      | 67%  | United Kingdom | Unclear    | 32 patients, 21 HCP, 1 hospital relocation, 2 control hospitals                                                                   | Mixed                                         | Unclear           | Mixed         | Qualitative (confidentiality)                                         |                                           |                              |
| <b>Before and after a hospital relocation</b>                                 |      |                |            |                                                                                                                                   |                                               |                   |               |                                                                       |                                           |                              |
| Ferri 2015 <sup>41</sup>                                                      | 100% | Canada         | Adults     | 39 HCPs, of which 13 nurses, 7 respiratory therapists, 5 HCPS (other), 6 physicians, 4 family members 4 support staff, 1 hospital | Unclear                                       | Unclear           | ICU           | Qualitative (patient perceptions of confidentiality)                  |                                           |                              |
| Jones 2016 <sup>58</sup>                                                      | 100% | Australia      | Neonates   | 66 mothers, 51 nurses, 1 hospital relocation                                                                                      | Adults, Mothers of premature neonates, Nurses | Maternity         | NICU          | Qualitative (nurse perceptions of confidentiality, facilitating care) |                                           |                              |
| Florey 2009 <sup>42</sup>                                                     | 44%  | United Kingdom | Adults     | 80 patients, 2 hospitals, 1 move                                                                                                  | Medical and surgical, Adults                  | Unclear           | Routine       | p<0.001 ability to have confidential discussions                      |                                           |                              |
| Real 2018 <sup>105</sup>                                                      | 56%  | United States  | Unclear    | 111 patients, 77 nurses, 1 hospital, 1 ward                                                                                       | Cardio-vascular                               | Unclear           | ICU, Routine  |                                                                       | Patient satisfaction with confidentiality |                              |



| Citation                          | QA         | Location       | Population          | Number of patients/hospitals                   | Patient type                                        | Type of admission  | Level of care | Data that favour single room                                                                                                       | Data showing no difference | Data that favour shared room |
|-----------------------------------|------------|----------------|---------------------|------------------------------------------------|-----------------------------------------------------|--------------------|---------------|------------------------------------------------------------------------------------------------------------------------------------|----------------------------|------------------------------|
| Roos 2020 <sup>108</sup>          | 90%        | Norway         | Adults              | 39 patients, 1 hospital relocation             | Internal medicine, Surgical, Maternity              | Maternity, Unclear | Routine       | Qualitative (patient perceptions of confidentiality)                                                                               |                            |                              |
| <b>Contemporaneous comparison</b> |            |                |                     |                                                |                                                     |                    |               |                                                                                                                                    |                            |                              |
| Bodack 2016 <sup>10</sup>         | 56%        | Germany        | Neonates            | 35 pairs of parents of 40 neonates, 1 hospital | Neonates                                            | Emergency          | ICU           | Qualitative (easier to guarantee confidentiality)                                                                                  |                            |                              |
| Bevan 2016 <sup>5</sup>           | 59%        | United Kingdom | Adults, Elderly     | 50 patients, 2 hospitals                       | Acute illness                                       | Emergency          | Routine       | Qualitative (patient perceptions of confidentiality)                                                                               |                            |                              |
| Hosseini 2017 <sup>52</sup>       | 63%        | Iran           | Adults              | 2 hospitals 132 patients                       | Adults, Medical or surgical                         | Unclear            | Routine       | p<0.001 comfortable discussing personal problems                                                                                   |                            |                              |
| Malcolm 2005 <sup>78</sup>        | 80%        | New Zealand    | Adolescents, Adults | 12 former patients                             | Mixed surgery, orthopaedic, medical, obstetric, ENT | Mixed              | Routine       | Qualitative (patients in shared rooms felt a lack of privacy and confidentiality which affected relationships with other patients) |                            |                              |
| <b>Evidence synthesis</b>         |            |                |                     |                                                |                                                     |                    |               |                                                                                                                                    |                            |                              |
| OECD WHO 2019 <sup>92</sup>       | Report 14% | Europe         | NR                  | NR                                             | Mixed                                               | Mixed              | Mixed         | p<0.05, improved patient confidentiality                                                                                           |                            |                              |

**Table 2. Summary of studies reporting data on availability of beds, space requirements, and capital costs**

| Citation                                                                      | QA   | Location       | Population | Number of patients/<br>hospitals                                            | Patient type                                  | Type of admission | Level of care | Data that favour single room                                          | Data showing no difference    | Data that favour shared room                                            |
|-------------------------------------------------------------------------------|------|----------------|------------|-----------------------------------------------------------------------------|-----------------------------------------------|-------------------|---------------|-----------------------------------------------------------------------|-------------------------------|-------------------------------------------------------------------------|
| <b>Before and after a hospital relocation plus contemporaneous comparison</b> |      |                |            |                                                                             |                                               |                   |               |                                                                       |                               |                                                                         |
| Maben 2016 <sup>77</sup>                                                      | 67%  | United Kingdom | Unclear    | 32 patients, 21 HCP, 1 hospital relocation, 2 control hospitals             | Mixed                                         | Unclear           | Mixed         |                                                                       |                               | Higher space requirement for single-bed wards<br>Building costs per bed |
| <b>Before and after a hospital relocation</b>                                 |      |                |            |                                                                             |                                               |                   |               |                                                                       |                               |                                                                         |
| Darley 2018 <sup>24</sup>                                                     | 56%  | United Kingdom | Unclear    | 1 hospital relocation                                                       | Unclear                                       | Unclear           | Routine       | Ward closures per year<br>Bed days lost per 100,000                   |                               |                                                                         |
| Domanico 2011 <sup>29</sup>                                                   | 63%  | United States  | Neonates   | 162 patients (PEMRs 2/3=150, PEMRs 4=12), 1 hospital, 2 units               | Paediatric                                    | NR                | NICU          | Number of patients accommodated;<br>Total space                       |                               |                                                                         |
| Jones 2016 <sup>58</sup>                                                      | 100% | Australia      | Neonates   | 66 mothers, 51 nurses, 1 hospital relocation                                | Adults, Mothers of premature neonates, Nurses | Maternity         | NICU          | Capacity                                                              |                               | Room space                                                              |
| Jongerden 2013 <sup>59</sup>                                                  | 67%  | Netherlands    | Adults     | 387 patients, 323 completed surveys, 1 hospital Before and after relocation | Mixed, Adults                                 | Mixed             | ICU           | Number of beds<br>Space per bed                                       |                               |                                                                         |
| Jung 2022 <sup>62</sup>                                                       | 67%  | Korea          | Adults     | 901 patients, 1 hospital Before and after renovation                        | Adult, mixed                                  | Unclear           | ICU           |                                                                       | Number of isolated rooms      | Number of beds                                                          |
| Kosuge 2013 <sup>67</sup>                                                     | 41%  | Japan          | Unclear    | 555 beds, 1 hospital                                                        | Surgical, Internal medicine                   | Unclear           | Routine       | Number of beds (working, general, per nursing unit)<br>Wards in total | Number of beds (tuberculosis) | Number of beds (mental, cases of floor transfer)                        |



| Citation                          | QA  | Location             | Population      | Number of patients/ hospitals                             | Patient type                 | Type of admission         | Level of care | Data that favour single room                                                                                                                                                  | Data showing no difference                           | Data that favour shared room                          |
|-----------------------------------|-----|----------------------|-----------------|-----------------------------------------------------------|------------------------------|---------------------------|---------------|-------------------------------------------------------------------------------------------------------------------------------------------------------------------------------|------------------------------------------------------|-------------------------------------------------------|
|                                   |     |                      |                 |                                                           |                              |                           |               |                                                                                                                                                                               | Total number of people / day and the wards           |                                                       |
| Lawson 2000 <sup>69</sup>         | 41% | United Kingdom       | Adults          | 424 patients, 2 hospitals, 4 wards (pre-/post-relocation) | Orthopaedic                  | Unclear                   | Routine       | Number of beds                                                                                                                                                                |                                                      |                                                       |
| Real 2018 <sup>105</sup>          | 56% | United States        | Unclear         | 111 patients, 77 nurses, 1 hospital, 1 ward               | Cardio-vascular              | Unclear                   | ICU, Routine  | Qualitative (larger rooms promote more space for family)                                                                                                                      |                                                      |                                                       |
| Rosbergen 2020 <sup>109</sup>     | 74% | Australia            | Adults, Elderly | 73 patients, 1 hospital relocation                        | Stroke, Neurological         | Emergency, Rehabilitation | Routine       | p=0.007, number of single bedrooms in acute stroke unit/ neurology<br>p<0.001, number of single bedrooms in inpatient rehab unit<br>Ward length<br>Total communal floor space | Number of any bedrooms, acute stroke unit/ neurology | Number of any bedrooms, inpatient rehabilitation unit |
| <b>Contemporaneous comparison</b> |     |                      |                 |                                                           |                              |                           |               |                                                                                                                                                                               |                                                      |                                                       |
| Julian 2015 <sup>61</sup>         | 78% | United States        | Neonates        | 1823 patients, 1 hospital, 1 unit                         | Neonates                     | Mixed                     | NICU          |                                                                                                                                                                               |                                                      | Bed capacity                                          |
| Kinnula 2008 <sup>64</sup>        | 63% | Finland              | Children        | 1927 patients, 1 hospital                                 | Children, infectious disease | Mixed                     | Routine       | Single rooms usage (approx. 90%)                                                                                                                                              | Number of rooms                                      |                                                       |
| Kinnula 2012 <sup>65</sup>        | 67% | Finland, Switzerland | Children        | 5119 patients, 3 hospitals, 4 wards                       | Children, mixed              | Mixed                     | Routine       |                                                                                                                                                                               |                                                      | Bed capacity                                          |
| Pineda 2012 <sup>100</sup>        | 70% | United States        | Neonates        | 81 patients, 1 hospital                                   | Premature neonates           | Emergency                 | NICU          |                                                                                                                                                                               |                                                      | Number of beds; Room/ward area                        |



| Citation                      | QA   | Location              | Population | Number of patients/<br>hospitals | Patient type | Type of admission | Level of care | Data that favour single room | Data showing no difference | Data that favour shared room |
|-------------------------------|------|-----------------------|------------|----------------------------------|--------------|-------------------|---------------|------------------------------|----------------------------|------------------------------|
| Quach 2018 <sup>104</sup>     | 59%  | Canada, United States | Children   | 83,334 patient-days, 2 hospitals | Children     | Mixed             | Mixed         |                              |                            | Bed capacity                 |
| Stelwagen 2021 <sup>120</sup> | 100% | Netherlands           | Neonates   | 36 parents, 1 hospital           | Neonates     | Emergency         | ICU           | Capacity; Room/ward area     |                            |                              |

For peer review only

**Table 16. Summary of studies reporting data on length of stay**

| Citation                                                                      | QA  | Location       | Population | Number of patients/ hospitals                                   | Patient type         | Type of admission | Level of care | Data that favour single room                                                                                                                                          | Data showing no difference                 | Data that favour shared room                                                                                                                                      |
|-------------------------------------------------------------------------------|-----|----------------|------------|-----------------------------------------------------------------|----------------------|-------------------|---------------|-----------------------------------------------------------------------------------------------------------------------------------------------------------------------|--------------------------------------------|-------------------------------------------------------------------------------------------------------------------------------------------------------------------|
| <b>Before and after a hospital relocation plus contemporaneous comparison</b> |     |                |            |                                                                 |                      |                   |               |                                                                                                                                                                       |                                            |                                                                                                                                                                   |
| Maben 2016 <sup>77</sup>                                                      | 67% | United Kingdom | Unclear    | 32 patients, 21 HCP, 1 hospital relocation, 2 control hospitals | Mixed                | Unclear           | Mixed         | LOS (per 1,000 patient-days): new hospital older people's ward, control new-build hospital older people's ward, steady-state control hospital medical assessment unit |                                            | LOS (per 1,000 patient-days): new hospital assessment unit, control new-build hospital medical assessment unit, steady-state control hospital older people's ward |
| <b>Before and after a hospital relocation</b>                                 |     |                |            |                                                                 |                      |                   |               |                                                                                                                                                                       |                                            |                                                                                                                                                                   |
| Blandfort 2019 <sup>6</sup>                                                   | 67% | Denmark        | Elderly    | 964 patients, 2 hospitals                                       | Geriatric, Dementia  | Elective          | Routine       | p=0.35, median LOS                                                                                                                                                    |                                            |                                                                                                                                                                   |
| Blandfort 2019 <sup>7</sup>                                                   | 67% | Denmark        | Elderly    | 1014 patients, 2 hospitals                                      | Geriatric, Dementia  | Elective          | Routine       | Fewer cases with LOS ≥ 14 days                                                                                                                                        | Minimum LOS                                | Maximum LOS                                                                                                                                                       |
| Cantoni 2009 <sup>16</sup>                                                    | 67% | Switzerland    | Adults     | 227 patients, 1 hospital                                        | Stem cell transplant | Elective          | Routine       | LOS<br>Duration of catheterisation<br>Number of patients catheterised                                                                                                 |                                            |                                                                                                                                                                   |
| Carter 2008 <sup>18</sup>                                                     | 33% | United States  | Neonates   | 53 parents, 1 hospital Before and after relocation              | Neonates             | Emergency         | NICU          | LOS                                                                                                                                                                   |                                            |                                                                                                                                                                   |
| Davis 2019 <sup>25</sup>                                                      | 67% | Australia      | Adults     | 1569 patients, 1 hospital relocation                            | Orthopaedic          | Elective          | Routine       |                                                                                                                                                                       | p=0.698, ward LOS<br>p=0.226, hospital LOS |                                                                                                                                                                   |
| Domanico 2010 <sup>28</sup>                                                   | 63% | United States  | Neonates   | 161 caregivers, 1 hospital, 2 units                             | Paediatric           | NR                | NICU          | LOS                                                                                                                                                                   |                                            |                                                                                                                                                                   |
| Domanico 2011 <sup>29</sup>                                                   | 63% | United States  | Neonates   | 162 patients (PEMRs 2/3=150,                                    | Paediatric           | NR                | NICU          |                                                                                                                                                                       | p=0.340, LOS for PEMR 2 and 3 patients     |                                                                                                                                                                   |



| Citation                     | QA  | Location      | Population | Number of patients/ hospitals                                               | Patient type       | Type of admission | Level of care | Data that favour single room                  | Data showing no difference                                                                                             | Data that favour shared room                                                                               |
|------------------------------|-----|---------------|------------|-----------------------------------------------------------------------------|--------------------|-------------------|---------------|-----------------------------------------------|------------------------------------------------------------------------------------------------------------------------|------------------------------------------------------------------------------------------------------------|
|                              |     |               |            | PEMRs 4=12), 1 hospital, 2 units                                            |                    |                   |               |                                               | p=0.890, LOS for PEMR 4 patients                                                                                       |                                                                                                            |
| Erickson 2011 <sup>38</sup>  | 67% | United States | Neonates   | 73 patients, 1 hospital Before and after relocation                         | Preterm neonates   | Emergency         | NICU          |                                               | p=0.73, LOS                                                                                                            |                                                                                                            |
| Gregersen 2021 <sup>46</sup> | 70% | Denmark       | Elderly    | 446 patients, 1 hospital relocation                                         | Geriatric          | Unclear           | Routine       |                                               | p=0.50, hospital LOS                                                                                                   |                                                                                                            |
| Harris 2004 <sup>49</sup>    | 74% | Canada        | Adults     | 976 patients, 1 hospital, Before and after new unit established             | Pregnancy          | Maternity         | Routine       | p<0.001, total LOS<br>p<0.001, postpartum LOS |                                                                                                                        | p=0.01, length of first stage labour<br>p=0.002, length of second stage labour<br>p=0.002, intrapartum LOS |
| Hourigan 2018 <sup>53</sup>  | 63% | United States | Neonates   | 32 patients, 1 hospital Before and after relocation                         | Neonates           | Emergency         | ICU           |                                               | p=0.52, LOS                                                                                                            |                                                                                                            |
| Jansen 2021 <sup>55</sup>    | 63% | Netherlands   | Neonates   | 712 patients, 1 hospital, 2 units relocation                                | Premature neonates | Maternity         | NICU          |                                               | p=0.36, hospital LOS                                                                                                   |                                                                                                            |
| Jongerden 2013 <sup>59</sup> | 67% | Netherlands   | Adults     | 387 patients, 323 completed surveys, 1 hospital Before and after relocation | Mixed, Adults      | Mixed             | ICU           |                                               | p=0.25, ICU LOS: family<br>p=0.11, ICU LOS: patients<br>p=0.25, hospital LOS: family<br>p=0.60, hospital LOS: patients |                                                                                                            |
| Jung 2022 <sup>62</sup>      | 67% | Korea         | Adults     | 901 patients, 1 hospital Before and after renovation                        | Adult, mixed       | Unclear           | ICU           |                                               | p=0.575, ICU LOS                                                                                                       |                                                                                                            |

| Citation                    | QA  | Location       | Population | Number of patients/ hospitals                                   | Patient type                 | Type of admission | Level of care | Data that favour single room                                                                                                                          | Data showing no difference                               | Data that favour shared room                                                      |
|-----------------------------|-----|----------------|------------|-----------------------------------------------------------------|------------------------------|-------------------|---------------|-------------------------------------------------------------------------------------------------------------------------------------------------------|----------------------------------------------------------|-----------------------------------------------------------------------------------|
| Kainiemi 2021 <sup>63</sup> | 59% | Finland        | Neonates   | 61 families, 1 hospital, 1 unit (pre-post-restructuring)        | Pre-term infants (<35 weeks) | Unclear           | NICU          |                                                                                                                                                       | p=0.1784, hospital LOS                                   |                                                                                   |
| Kosuge 2013 <sup>67</sup>   | 41% | Japan          | Unclear    | 555 beds, 1 hospital                                            | Surgical, Internal medicine  | Unclear           | Routine       | Average hospital LOS (surgery, internal medicine)                                                                                                     |                                                          |                                                                                   |
| Lawson 2000 <sup>69</sup>   | 41% | United Kingdom | Adults     | 424 patients, 2 hospitals, 4 wards (pre-/post-relocation)       | Psychiatric and Orthopaedic  | Unclear           | Routine       | p<0.05, hospital LOS (orthopaedic patients not undergoing operation)<br>Hospital LOS overall (psychiatric patients)<br>ICU LOS (psychiatric patients) | Hospital LOS (orthopaedic patients undergoing operation) |                                                                                   |
| Milford 2008 <sup>84</sup>  | 30% | United States  | Neonates   | No. of patients unclear, 1 hospital Before and after relocation | Neonates                     | Emergency         | ICU           | Average LOS                                                                                                                                           |                                                          |                                                                                   |
| Monson 2018 <sup>86</sup>   | 78% | United States  | Neonates   | 90 preterm infants, 15 term-born control infants, 1 hospital    | Preterm neonates             | Emergency         | NICU          |                                                                                                                                                       | p=0.81, LOS                                              |                                                                                   |
| Puumala 2020 <sup>102</sup> | 67% | United States  | Neonates   | 9995 patients, 1 hospital Before and after relocation           | Neonates                     | Emergency         | ICU           | p=0.02, LOS for extremely preterm infants<br>p<0.0001, LOS for very preterm infants                                                                   | p=0.71, LOS for moderately pre-term                      | p<0.0001, overall median hospital LOS<br>p<0.0001, LOS for term/post term infants |
| Pyrke 2017 <sup>103</sup>   | 59% | Canada         | Adults     | 47 patients, 1 hospital relocation                              | Psychiatric                  | Emergency         | Routine       |                                                                                                                                                       | p=0.832, LOS                                             |                                                                                   |

| Citation                           | QA   | Location       | Population      | Number of patients/ hospitals                                       | Patient type                           | Type of admission | Level of care | Data that favour single room                                                    | Data showing no difference | Data that favour shared room                                         |
|------------------------------------|------|----------------|-----------------|---------------------------------------------------------------------|----------------------------------------|-------------------|---------------|---------------------------------------------------------------------------------|----------------------------|----------------------------------------------------------------------|
| Sadatsafavi 2019 <sup>112</sup>    | 100% | United States  | Neonates        | NR, 1 hospital (theoretical)                                        | Neonates                               | NR                | ICU           | Mean benefit–cost ratio 1.298 (95% CI: 1.282–1.315) when reduced LOS considered |                            |                                                                      |
| Singh 2015 <sup>116</sup>          | 70%  | United Kingdom | Adults, Elderly | 1749 patients, 1 hospital relocation                                | Internal medicine, Geriatric           | Mixed             | Routine       | p<0.01, LOS                                                                     |                            |                                                                      |
| Stevens 2014 <sup>123</sup>        | 44%  | United States  | Neonates        | 73 patients, 1 hospital                                             | Neonates                               | Emergency         | ICU           |                                                                                 |                            | p=0.0052, hospital LOS                                               |
| Teltsch 2011 <sup>131</sup>        | 67%  | Canada         | Adults          | 19343 patients, 2 hospitals, Before and after relocation or control | Adults                                 | Unclear           | ICU           |                                                                                 |                            | Average ICU LOS (year 2000, 2001, 2002, 2003, 2004, 2005, and total) |
| van der Hoeven 2022 <sup>135</sup> | 63%  | Netherlands    | Infants         | 1293 infants, 1 hospital Before and after relocation                | Infants                                | Unclear           | ICU           |                                                                                 | p=0.49, hospital LOS       |                                                                      |
| van Veenendaal 2020 <sup>137</sup> | 70%  | Netherlands    | Neonates        | 1152 infants, 1 hospital Before and after relocation                | Neonates                               | Emergency         | ICU           | p=0.016, LOS                                                                    |                            |                                                                      |
| Vietri 2004 <sup>139</sup>         | 59%  | United States  | Adults          | 261 Adults, 1 hospital Before and after relocation                  | Mixed                                  | Unclear           | ICU           |                                                                                 | p=NS, ICU LOS              |                                                                      |
| <b>Contemporaneous comparison</b>  |      |                |                 |                                                                     |                                        |                   |               |                                                                                 |                            |                                                                      |
| Bodack 2016 <sup>10</sup>          | 56%  | Germany        | Neonates        | 35 pairs of parents of 40 neonates, 1 hospital                      | Neonates                               | Emergency         | ICU           | LOS                                                                             |                            |                                                                      |
| Bracco 2007 <sup>13</sup>          | 74%  | Canada         | Adults          | 2522 patients (of whom 207 known MRS carriers at                    | Mixed, Post surgery, Medical admission | Mixed             | ICU           | LOS in the same bed                                                             | LOS                        |                                                                      |



| Citation                                                | QA  | Location       | Population       | Number of patients/ hospitals                        | Patient type                               | Type of admission | Level of care | Data that favour single room | Data showing no difference                                                                         | Data that favour shared room      |
|---------------------------------------------------------|-----|----------------|------------------|------------------------------------------------------|--------------------------------------------|-------------------|---------------|------------------------------|----------------------------------------------------------------------------------------------------|-----------------------------------|
|                                                         |     |                |                  | admission), 1 hospital, 1 ward                       |                                            |                   |               |                              |                                                                                                    |                                   |
| Caruso 2014 <sup>19</sup>                               | 74% | Brazil         | Adults           | 1253 patients, 1 hospital                            | Adults                                     | Mixed             | ICU           |                              | p=0.44, ICU LOS                                                                                    |                                   |
| Deitrick 2010 <sup>26</sup>                             | 90% | United States  | Adults           | 24 patients, 29 HCP, 2 hospitals, 2 wards            | Orthopaedic, Neurological, Surgical        | Unclear           | Routine       | LOS                          |                                                                                                    |                                   |
| Douglas 2005 <sup>30</sup>                              | 90% | United Kingdom | Unclear          | 785 patients (post discharge), 1 hospital            | Surgical, Acute care, Maternity, Geriatric | Unclear           | Routine       |                              | LOS                                                                                                |                                   |
| Erdeve 2008, <sup>36</sup><br>Erdeve 2009 <sup>37</sup> | 74% | Turkey         | Adults, Neonates | 60 infants, 49 mothers, 1 hospital                   | Preterm neonates                           | Emergency         | NICU          |                              | p=0.929, NICU LOS                                                                                  |                                   |
| Felice Tong 2018 <sup>40</sup>                          | 78% | Australia      | Adults           | 185 patients, 1 hospital                             | Orthopaedic                                | Elective          | Routine       |                              | p=0.36, overall LOS<br>p=0.73, LOS for total hip arthroplasty<br>p=0.55, LOS for knee arthroplasty |                                   |
| Grundt 2021 <sup>47</sup>                               | 67% | Norway         | Neonates         | 77 patients, 66 mothers, 2 hospitals, 2 units        | Premature neonates                         | Maternity         | NICU          |                              | p=0.16, LOS                                                                                        |                                   |
| Harris 2006 <sup>50</sup>                               | 63% | United States  | Neonates         | 75 HCP, 21 parents, 5 NICU units (SFR=2, open bay=3) | Neonates                                   | Unclear           | Level 3, NICU | Patient transfers            |                                                                                                    | Average LOS<br>Average discharges |
| Harris 2006 <sup>51</sup>                               | 52% | United States  | Neonates         | 21 parents, 75 HCPs                                  | Neonates                                   | Maternity         | ICU           |                              |                                                                                                    | Average LOS                       |
| Hyun 2021 <sup>54</sup>                                 | 78% | South Korea    | Adults           | 666 patients, 1 hospital                             | Respiratory, COVID-19                      | Emergency         | ICU           | p=0.001, hospital LOS        |                                                                                                    |                                   |
| Kinnula 2008 <sup>64</sup>                              | 63% | Finland        | Children         | 1927 patients, 1 hospital                            | Children, infectious disease               | Mixed             | Routine       |                              | hospital LOS                                                                                       |                                   |

| Citation                     | QA  | Location             | Population   | Number of patients/ hospitals                        | Patient type               | Type of admission | Level of care | Data that favour single room                    | Data showing no difference | Data that favour shared room                                                  |
|------------------------------|-----|----------------------|--------------|------------------------------------------------------|----------------------------|-------------------|---------------|-------------------------------------------------|----------------------------|-------------------------------------------------------------------------------|
| Kinnula 2012 <sup>65</sup>   | 67% | Finland, Switzerland | Children     | 5119 patients, 3 hospitals, 4 wards                  | Children, mixed            | Mixed             | Routine       |                                                 |                            | Mean hospital LOS                                                             |
| Knight 2016 <sup>66</sup>    | 59% | United Kingdom       | Elderly      | 100 patients, 2 hospitals                            | Geriatric, Dementia        | Mixed             | Routine       |                                                 |                            | p=0.001, overall LOS p=0.01, LOS (patients who experienced an inpatient fall) |
| Labarère 2004 <sup>68</sup>  | 70% | France               | Adults       | 4095 patients, 1 hospital                            | Mixed                      | Mixed             | Mixed         |                                                 | hospital LOS               |                                                                               |
| Lehtonen 2020 <sup>71</sup>  | 74% | International        | Neonates     | 4662 patients, 331 units                             | Preterm neonates           | Emergency         | ICU           | Overall LOS OR <sup>a</sup> -3.4 (-4.7 to -3.1) |                            |                                                                               |
| Mattner 2007 <sup>79</sup>   | 74% | Germany              | Adults       | 336 patients, 1 hospital                             | Cardiovascular Adults      | Mixed             | ICU           | p=0.004, LOS                                    |                            |                                                                               |
| Vohr 2017 <sup>140</sup>     | 67% | United States        | Neonates     | 651 patients, 1 hospital Before and after relocation | Neonates                   | Emergency         | NICU          |                                                 |                            | p=0.07, hospital LOS                                                          |
| Tandberg 2019 <sup>128</sup> | 67% | Norway               | Neonates     | 77 patients, 2 hospitals                             | Neonates                   | Emergency         | ICU           |                                                 | p=0.16, LOS                |                                                                               |
| Lester 2014 <sup>72</sup>    | 63% | United States        | Neonates     | 403 patients, 1 hospital                             | Neonates                   | Emergency         | ICU           |                                                 | p=0.382, LOS               |                                                                               |
| Lester 2016 <sup>73</sup>    | 59% | United States        | Neonates     | 216 patients, 1 hospital                             | Premature neonates         | Maternity         | ICU           |                                                 | p=0.06, LOS                |                                                                               |
| Zaal 2013 <sup>145</sup>     | 67% | Netherlands          | Older Adults | 156 patients 1 hospital                              | Older Adults with dementia | Mixed             | ICU           |                                                 | p=0.56, LOS                |                                                                               |
| <b>Evidence synthesis</b>    |     |                      |              |                                                      |                            |                   |               |                                                 |                            |                                                                               |
| OECD WHO 2019 <sup>92</sup>  | 14% | Europe               | NR           | NR                                                   | Mixed                      | Mixed             | Mixed         |                                                 | p=NS. LOS                  |                                                                               |
| Voigt 2018 <sup>141</sup>    | 86% | International        | NR           | NR                                                   | NR                         | Unclear           | Routine       |                                                 | LOS                        |                                                                               |

**Table 17. Summary of studies reporting data on costs of care**

| Citation                                                                      | QA   | Location       | Population | Number of patients/ hospitals                                      | Patient type             | Type of admission | Level of care | Data that favour single room                                                                                                                   | Data showing no difference                                                           | Data that favour shared room                                                                                  |
|-------------------------------------------------------------------------------|------|----------------|------------|--------------------------------------------------------------------|--------------------------|-------------------|---------------|------------------------------------------------------------------------------------------------------------------------------------------------|--------------------------------------------------------------------------------------|---------------------------------------------------------------------------------------------------------------|
| <b>Before and after a hospital relocation plus contemporaneous comparison</b> |      |                |            |                                                                    |                          |                   |               |                                                                                                                                                |                                                                                      |                                                                                                               |
| Maben 2015 <sup>76</sup>                                                      | 78%  | United Kingdom | Unclear    | 24 staff, 32 patients, 1 hospital (relocated), 2 control hospitals | All patients in hospital | Mixed             | Mixed         |                                                                                                                                                | Cost impact (changes in falls, LOS, medication errors, hospital-acquired infections) |                                                                                                               |
| Maben 2016 <sup>77</sup>                                                      | 67%  | United Kingdom | Unclear    | 32 patients, 21 HCP, 1 hospital relocation, 2 control hospitals    | Mixed                    | Unclear           | Mixed         |                                                                                                                                                |                                                                                      | Cleaning costs per bed<br>Nursing staff full-time equivalent<br>Nursing staff costs                           |
| <b>Before and after a hospital relocation</b>                                 |      |                |            |                                                                    |                          |                   |               |                                                                                                                                                |                                                                                      |                                                                                                               |
| Davis <sup>25</sup> 2019                                                      | 67%  | Australia      | Adults     | 1569 patients, 1 hospital relocation                               | Orthopaedic              | Elective          | Routine       |                                                                                                                                                | p=0.311, discharge to home<br>p=0.406, transfer to other facility                    |                                                                                                               |
| Harris 2004 <sup>49</sup>                                                     | 74%  | Canada         | Adults     | 976 patients, 1 hospital, Before and after new unit established    | Pregnancy                | Maternity         | Routine       | Reduction in overall staffing costs after opening single-room maternity care                                                                   |                                                                                      |                                                                                                               |
| Milford 2008 <sup>84</sup>                                                    | 30%  | United States  | Neonates   | No. of patients unclear, 1 hospital                                | Neonates                 | Emergency         | ICU           | Cost savings due to reduced LOS                                                                                                                |                                                                                      |                                                                                                               |
| Reed 1986 <sup>106</sup>                                                      | 10%  | United States  | Adults     | No. of patients unclear, 1 hospital                                | Pregnant women           | Maternity care    | Routine       | Number of staff required                                                                                                                       |                                                                                      |                                                                                                               |
| Sadatsafavi 2019 <sup>112</sup>                                               | 100% | United States  | Neonates   | 1 hospital (theoretical)                                           | Neonates                 | NR                | ICU           | Investment justifiable when direct costs considered, mean benefit–cost ratio 1.794 (1.783–1.804)<br>Investment justifiable when LOS considered |                                                                                      | Investment not justifiable when nosocomial infections considered, mean benefit–cost ratio 0.730 (0.724-0.735) |

|                                   |     |                |                 |                                                      |                              |           |               |                                                                                                                                            |                                                                                                                                                                          |                                                                                                                                                              |
|-----------------------------------|-----|----------------|-----------------|------------------------------------------------------|------------------------------|-----------|---------------|--------------------------------------------------------------------------------------------------------------------------------------------|--------------------------------------------------------------------------------------------------------------------------------------------------------------------------|--------------------------------------------------------------------------------------------------------------------------------------------------------------|
| Singh 2015 <sup>116</sup>         | 70% | United Kingdom | Adults, Elderly | 1749 patients, 1 hospital relocation                 | Internal medicine, Geriatric | Mixed     | Routine       |                                                                                                                                            | p=0.74, discharge to home<br>p=0.21, discharge to new care home                                                                                                          |                                                                                                                                                              |
| Stevens 2012 <sup>122</sup>       | 44% | United States  | Neonates        | 73 patients, 1 hospital Before and after relocation  | Neonates                     | Emergency | ICU           | Direct cost (infants with equal comorbidities, duration of hospitalisation)                                                                | Costs per square foot                                                                                                                                                    | p <sup>2</sup> =statistically significant, need for nursing and all unit staff                                                                               |
| Stevens 2014 <sup>123</sup>       | 44% | United States  | Neonates        | 73 patients, 1 hospital                              | Neonates                     | Emergency | ICU           | p<0.0001, lower costs for supplies<br>p<0.0001, lower depreciation in costs<br>Full adjustment of the model shows a cost advantage for SFR | p=0.2316, total direct costs<br>p=0.1551, other costs<br>General linear model:<br>p=0.2854, admission<br>p=0.2485, severity<br>p=0.2806, duration of respiratory support | p=0.0373, direct costs for NICU labour<br>p=0.0002, direct costs for other labour costs (therapies, radiology, pharmacy)                                     |
| <b>Contemporaneous comparison</b> |     |                |                 |                                                      |                              |           |               |                                                                                                                                            |                                                                                                                                                                          |                                                                                                                                                              |
| Apple 2014 <sup>4</sup>           | 52% | Sweden         | Unclear         | 81 HCP, 3 ICUs                                       | Mixed                        | Unclear   | ICU           |                                                                                                                                            |                                                                                                                                                                          | Number of staff equired                                                                                                                                      |
| Boardman 2011 <sup>8</sup>        | 91% | Canada         | Unclear         | 537 beds, 1 hospital                                 | Mixed                        | Mixed     | Mixed         | Reduced transfers and waiting time<br>Net social benefits taking into account upfront and ongoing costs and annual benefits                |                                                                                                                                                                          | Cost of a bed per day<br>Up-front land and construction costs<br>On-going annual maintenance, housekeeping, operating, additional nursing and phsycian costs |
| Felice Tong 2018 <sup>40</sup>    | 78% | Australia      | Adults          | 185 patients, 1 hospital                             | Orthopaedic                  | Elective  | Routine       | p=0.002 <sup>u</sup> , p=0.002 <sup>m</sup><br>discharge to rehabilitation                                                                 |                                                                                                                                                                          |                                                                                                                                                              |
| Harris 2006 <sup>50</sup>         | 63% | United States  | Neonates        | 75 HCP, 21 parents, 5 NICU units (SFR=2, open bay=3) | Neonates                     | Unclear   | Level 3, NICU |                                                                                                                                            |                                                                                                                                                                          | Construction costs per square foot                                                                                                                           |
| Harris 2006 <sup>51</sup>         | 63% | Canada         | Adults          | 976 patients, 1 hospital, Before and                 | Pregnancy                    | Maternity | Routine       |                                                                                                                                            |                                                                                                                                                                          | Average costs per square foot <sup>a</sup>                                                                                                                   |

|                                 |      |                              |         |                               |                      |         |         |                                          |                                                                   |                                      |
|---------------------------------|------|------------------------------|---------|-------------------------------|----------------------|---------|---------|------------------------------------------|-------------------------------------------------------------------|--------------------------------------|
|                                 |      |                              |         | after new unit established    |                      |         |         |                                          |                                                                   |                                      |
| Knight 2016 <sup>66</sup>       | 59%  | United Kingdom               | Elderly | 100 patients, 2 hospitals     | Geriatric, Dementia  | Mixed   | Routine |                                          | p=0.17, discharged to home<br>p=0.19, discharged to new care home |                                      |
| Sadatsafavi 2016 <sup>111</sup> | 100% | Canada                       | Unclear | 8811 patient-days, 1 hospital | Medical and surgical | Unclear | ICU     | Costs due to hospital acquired infection |                                                                   | Construction and operating costs     |
| <b>Evidence synthesis</b>       |      |                              |         |                               |                      |         |         |                                          |                                                                   |                                      |
| Adamson 2003 <sup>1</sup>       | 82%  | United States, International | Mixed   | Unclear                       | Mixed                | Mixed   | Mixed   |                                          |                                                                   | Costs per patient by floor plan type |
| Voigt 2018 <sup>141</sup>       | 86%  | International                | NR      | NR                            | NR                   | Unclear | Routine | Operational efficiencies                 |                                                                   |                                      |

## References

1. Adamson D. The Use of Single Patient Rooms vs. Multiple Occupancy Rooms in Acute Care Environments | Semantic Scholar [Internet]. 2003 [cited 2022 May 4]. Available from: <https://www.semanticscholar.org/paper/The-Use-of-Single-Patient-Rooms-vs.-Multiple-Rooms-Chaudhury-Mahmood/252452e8fa872a517c15d6ecf70c74f82a363271>
2. Anåker A, Von Koch L, Sjöstrand C, Bernhardt J, Elf M. A comparative study of patients' activities and interactions in a stroke unit before and after reconstruction—The significance of the built environment. *PLOS ONE*. 2017 Jul 1;12(7):e0177477.
3. Anåker A, Von Koch L, Heylighen A, Elf M. 'It's Lonely': Patients' Experiences of the Physical Environment at a Newly Built Stroke Unit. *Health Environments Research & Design Journal*. 2019;12(3):141–52.
4. Apple M. A Comparative Evaluation of Swedish Intensive Care Patient Rooms. *HERD*. 2014 Apr;7(3):78–93.
5. Bevan V, Edwards C, Woodhouse K, Singh I. Dignified care for older people: Mixed methods evaluation of the impact of the hospital environment - single rooms or multi-bedded wards: *Healthy Aging Research*. 2016;5(13):1–8.
6. Blandfort S, Gregersen M, Rahbek K, Juul S, Damsgaard EM. Analgesic and psychoactive medications and the risk of falls in relation to delirium in single-bed rooms compared to multiple-bed rooms in geriatric inpatients. *Aging Clinical and Experimental Research* 2019 32:8. 2019 Aug 28;32(8):1493–9.
7. Blandfort S, Gregersen M, Rahbek K, Juul S, Damsgaard EM. Single-bed rooms in a geriatric ward prevent delirium in older patients. *Aging Clinical and Experimental Research* 2019 32:1. 2019 Mar 21;32(1):141–7.
8. Boardman AE, Forbes D. A Benefit-Cost Analysis of Private and Semi-Private Hospital Rooms. *J Benefit Cost Anal*. 2011 Jan 3;2(1):1–27.
9. Bocquet A, Wintenberger C, Lupo J, Morand P, Pavese P, Gallouche M, et al. Description of an influenza outbreak in a French university hospital and risk factors of nosocomial influenza. *Eur J Clin Microbiol Infect Dis*. 2021 Apr;40(4):879–84.
10. Bodack E, Schenk O, Karutz H. Die Einrichtung von Einzelzimmern auf neonatologischen Intensivstationen – Auswirkungen auf die Betreuung aus Sicht der Eltern. *Z Geburtshilfe Neonatol*. 2016 Jun;220(3):124–9.
11. Bonizzoli M, Bigazzi E, Peduto C, Tucci V, Zagli G, Pecile P, et al. Microbiological survey following the conversion from a bay-room to single-room intensive care unit design. *Journal of Hospital Infection*. 2011 Jan;77(1):84–6.
12. Boztepe H, Çınar S, Ay A. School-age children's perception of the hospital experience. *J Child Health Care*. 2017 Jun;21(2):162–70.
13. Bracco D, Dubois MJ, Bouali R, Eggimann P. Single rooms may help to prevent nosocomial bloodstream infection and cross-transmission of methicillin-resistant *Staphylococcus aureus* in intensive care units. *Intensive Care Med*. 2007 May 1;33(5):836–40.
14. Bradbury-Jones C, Rattray J, Jones M, MacGillivray S. Promoting the health, safety and welfare of adults with learning disabilities in acute care settings: a structured literature review. *Journal of Clinical Nursing*. 2013;22(11–12):1497–509.
15. Campbell-Yeo M, Kim T, Disher T, Richardson B, Dol J, Bishop T, et al. Do Single-Family Rooms Increase Parental Presence, Involvement, and Maternal Well-Being in Neonatal Intensive Care? *Journal of Perinatal & Neonatal Nursing*. 2021 Oct;35(4):350–61.

16. Cantoni N, Weisser M, Buser A, Arber C, Stern M, Heim D, et al. Infection prevention strategies in a stem cell transplant unit: impact of change of care in isolation practice and routine use of high dose intravenous immunoglobulins on infectious complications and transplant related mortality - Cantoni - 2009 - European Journal of Haematology - Wiley Online Library [Internet]. [cited 2022 Jul 11]. Available from: <https://onlinelibrary.wiley.com/doi/10.1111/j.1600-0609.2009.01249.x>
17. Carlson B, Walsh S, Wergin T, Schwarzkopf K, Ecklund S. Challenges in design and transition to a private room model in the neonatal intensive care unit. *Adv Neonatal Care*. 2006 Oct;6(5):271–80.
18. Carter BS, Carter A, Bennett S. Families' views upon experiencing change in the neonatal intensive care unit environment: from the 'baby barn' to the private room. *J Perinatol*. 2008 Dec;28(12):827–9.
19. Caruso P, Guardian L, Tiengo T, dos Santos LS, Junior PM. ICU Architectural Design Affects the Delirium Prevalence: A Comparison Between Single-Bed and Multibed Rooms\*. *Critical Care Medicine*. 2014 Oct;42(10):2204–10.
20. Cobo J, Asensio Á, Moreno S, Navas E, Pintado V, Oliva J, et al. Risk factors for nosocomial transmission of multidrug-resistant tuberculosis due to *Mycobacterium bovis* among HIV-infected patients. :6.
21. Curtis P, Northcott A. The impact of single and shared rooms on family-centred care in children's hospitals. *Journal of Clinical Nursing*. 2017 Jun;26(11–12):1584–96.
22. Cusack L, Wiechula R, Schultz T, Dollard J, Maben J. Anticipated advantages and disadvantages of a move to 100% single-room hospital in Australia: A case study. *J Nurs Manag*. 2019 Jul;27(5):963–70.
23. Darcy Mahoney A, White RD, Velasquez A, Barrett TS, Clark RH, Ahmad KA. Impact of restrictions on parental presence in neonatal intensive care units related to coronavirus disease 2019. *J Perinatol*. 2020 Sep;40(S1):36–46.
24. Darley ESR, Vasant J, Leeming J, Hammond F, Matthews S, Albur M, et al. Impact of moving to a new hospital build, with a high proportion of single rooms, on healthcare-associated infections and outbreaks. *J Hosp Infect*. 2018 Feb;98(2):191–3.
25. Davis M, Elliott R, Hills R, Fry M. Single-Room Ward Design and Its Impact on Service and Patient Outcomes: An Evaluation Study. *Orthopaedic Nursing*. 2019 Oct;38(5):317–25.
26. Deitrick LM, Bokovoy J, Panik A. The "Dance" Continues ... Evaluating Differences in Call Bell Use Between Patients in Private Rooms and Patients in Double Rooms Using Ethnography. *Journal of Nursing Care Quality*. 2010 Oct;25(4):279–87.
27. de Matos LBN, Fumis RRL, Nassar Junior AP, Lacerda FH, Caruso P. Single-Bed or Multibed Room Designs Influence ICU Staff Stress and Family Satisfaction, But Do Not Influence ICU Staff Burnout. *HERD*. 2020 Apr;13(2):234–42.
28. Domanico R, Davis DK, Coleman F, Davis BO. Documenting the NICU design dilemma: parent and staff perceptions of open ward versus single family room units. *Journal of perinatology : official journal of the California Perinatal Association*. 2010 May;30(5):343–51.
29. Domanico R, Davis DK, Coleman F, Davis BO. Documenting the NICU design dilemma: comparative patient progress in open-ward and single family room units. *Journal of Perinatology* 2010 31:4. 2011 Nov 11;31(4):281–8.

30. Douglas CH, Douglas MR. Patient-centred improvements in health-care built environments: perspectives and design indicators. *Health Expect*. 2005 Sep;8(3):264–76.
31. Dowdeswell B, Erskine J, Heasman M. A Report for NHS Estates, England by the EU Health Property Network. :40.
32. Dowling DA, Blatz MA, Graham G. Mothers' Experiences Expressing Breast Milk for Their Preterm Infants: Does NICU Design Make a Difference? *Advances in Neonatal Care*. 2012 Dec;12(6):377–84.
33. Eberhard-Gran M, Eskild A, Opjordsmoen S, Schei B. Maternity care - sleep, rest and satisfaction. :10.
34. Edéll-Gustafsson U, Angelhoff C, Johnsson E, Karlsson J, Mörelius E. Hindering and buffering factors for parental sleep in neonatal care. A phenomenographic study. *J Clin Nurs*. 2015 Mar;24(5–6):717–27.
35. Ehrlander W, Ali F, Chretien KC. Multioccupancy hospital rooms: Veterans' experiences and preferences. *Journal of Hospital Medicine*. 2009;4(8):E22–7.
36. Erdevé O, Arsan S, Yigit S, Armangil D, Atasay B, Korkmaz A. The impact of individual room on rehospitalization and health service utilization in preterms after discharge. *Acta paediatrica (Oslo, Norway : 1992)*. 2008 Oct;97(10):1351–7.
37. Erdevé O, Arsan S, Canpolat FE, Ertem IO, Karagol BS, Atasay B, et al. Does individual room implemented family- centered care contribute to mother-infant interaction in preterm deliveries necessitating neonatal intensive care unit hospitalization? *American Journal of Perinatology*. 2009 Feb 19;26(2):159–64.
38. Erickson C, Kattelman K, Remington J, Cuirong Ren, Carol Helseth, Stevens D. Traditional open-bay versus single-family room neonatal intensive care unit: a comparison of selected nutrition outcomes. *Research and Reports in Neonatology*. 2011 Mar;15.
39. Everts RJ, Hanger HC, Jennings LC, Hawkins A, Sainsbury R. Outbreaks of influenza A among elderly hospital inpatients. *The New Zealand Medical Journal*. 1996 Jul 1;109(1026):272–4.
40. Felice Tong YY, Karunaratne S, Youlden D, Gupta S. The Impact of Room-Sharing on Length of Stay After Total Hip or Knee Arthroplasty: A Retrospective Study. *Arthroplasty Today*. 2021 Apr;8:289–294.e2.
41. Ferri M, Zygun DA, Harrison A, Stelfox HT. Evidence-based design in an intensive care unit: End-user perceptions. *BMC Anesthesiology*. 2015 Apr 25;15(1):1–9.
42. Florey L, Flynn R, Isles C. Patient Preferences for Single Rooms or Shared Accommodation in a District General Hospital. *Scott Med J*. 2009 May;54(2):5–8.
43. Foo CT, O'Driscoll DM, Ogeil RP, Lubman D, Young AC. Barriers to sleep in acute hospital settings. *Sleep Breath*. 2022 Jun;26(2):855–63.
44. Ford-Jones EL, Mindorff CM, Gold R, Petric M. THE INCIDENCE OF VIRAL-ASSOCIATED DIARRHEA AFTER ADMISSION TO A PEDIATRIC HOSPITAL. *American Journal of Epidemiology*. 1990 Apr;131(4):711–8.
45. Fraenkel Cj, Inghammar M, Söderlund-Strand A, Johansson PJH, Böttiger B. Risk factors for hospital norovirus outbreaks: impact of vomiting, genotype, and multi-occupancy rooms. *Journal of Hospital Infection*. 2018 Apr;98(4):398–403.



46. Gregersen M, Mellemkjær A, Foss CH, Blandfort S. Use of single-bed rooms may decrease the incidence of hospital-acquired infections in geriatric patients: A retrospective cohort study in Central Denmark region. *J Health Serv Res Policy*. 2021 Oct;26(4):282–8.
47. Grundt H, Tandberg BS, Flacking R, Drageset J, Moen A. Associations Between Single-Family Room Care and Breastfeeding Rates in Preterm Infants. *J Hum Lact*. 2021 Aug;37(3):593–602.
48. Halaby T, al Naiemi N, Beishuizen B, Verkooijen R, Ferreira JA, Klont R, et al. Impact of single room design on the spread of multi-drug resistant bacteria in an intensive care unit. *Antimicrob Resist Infect Control*. 2017 Dec;6(1):117.
49. Harris SJ, Farren MD, Janssen PA, Klein MC, Lee SK. Single room maternity care: perinatal outcomes, economic costs, and physician preferences. *Journal of obstetrics and gynaecology Canada : JOGC = Journal d'obstetrique et gynecologie du Canada : JOGC*. 2004;26(7):633–40.
50. Harris DD, Shepley MM, White RD, Kolberg KJS, Harrell JW. The impact of single family room design on patients and caregivers: executive summary. *Journal of Perinatology* 2006 26:3. 2006 Sep 28;26(3):S38–48.
51. Harris D, Shepley M, White R. Impact of Single Family NICU Rooms | The Center for Health Design [Internet]. 2006 [cited 2022 May 4]. Available from: <https://www.healthdesign.org/chd/knowledge-repository/impact-single-family-nicu-rooms>
52. Hosseini SB, Bagheri M. Comparison of Patient Satisfaction with Single Patient Rooms Versus Shared Patient Rooms. *Ann Mil Health Sci Res [Internet]*. 2018 Jul 8 [cited 2022 Jul 20];15(4). Available from: <https://brief.land/amhsr/articles/80199.html>
53. Hourigan SK, Subramanian P, Hasan NA, Ta A, Klein E, Chettout N, et al. Comparison of Infant Gut and Skin Microbiota, Resistome and Virulome Between Neonatal Intensive Care Unit (NICU) Environments. *Front Microbiol*. 2018 Jun 25;9:1361.
54. Hyun M, Lee JY, Kwon YS, Kim JY, Park JS, Park S, et al. COVID-19: Comparing the applicability of shared room and single room occupancy. *Transbound Emerg Dis*. 2021 Jul;68(4):2059–65.
55. Jansen SJ, Lopriore E, Berkhout RJM, van der Hoeven A, Saccoccia B, de Boer JM, et al. The Effect of Single-Room Care Versus Open-Bay Care on the Incidence of Bacterial Nosocomial Infections in Pre-Term Neonates: A Retrospective Cohort Study. *Infectious Diseases and Therapy*. 2021 Mar 1;10(1):373–86.
56. Janssen PA, Klein MC, Harris SJ, Soolsma J, Seymour LC. Single room maternity care and client satisfaction. *Birth (Berkeley, Calif)*. 2000;27(4):235–43.
57. Janssen PA, Dennis CL, Reime B. Development and psychometric testing of the care in obstetrics: Measure for testing satisfaction (COMFORTS) scale. *Research in Nursing & Health*. 2006 Feb 1;29(1):51–60.
58. Jones L, Peters K, Rowe J, Sheeran N. The Influence of Neonatal Nursery Design on Mothers' Interactions in the Nursery. *J Pediatr Nurs*. 2016 Oct;31(5):e301-312.
59. Jongerden IP, Slooter AJ, Peelen LM, Wessels H, Ram CM, Kesecioglu J, et al. Effect of intensive care environment on family and patient satisfaction: a before–after study. *Intensive Care Med*. 2013 Sep 1;39(9):1626–34.

- 1  
2  
3  
4  
5 60. Jou J, Ebrahim J, Shofer FS, Hamilton KW, Stern J, Han JH. Environmental Transmission of *Clostridium difficile* : Association Between  
6 Hospital Room Size and *C. difficile* Infection. *Infect Control Hosp Epidemiol*. 2015 May;36(5):564–8.  
7  
8 61. Julian S, Burnham CAD, Sellenriek P, Shannon WD, Hamvas A, Tarr PI, et al. Impact of Neonatal Intensive Care Bed Configuration on  
9 Rates of Late-Onset Bacterial Sepsis and Methicillin-Resistant *Staphylococcus aureus* Colonization. *Infection Control & Hospital  
10 Epidemiology*. 2015 Oct;36(10):1173–82.  
11  
12 62. Jung J, Choe PG, Choi S, Kim E, Lee HY, Kang CK, et al. Reduction in the acquisition rate of carbapenem-resistant *Acinetobacter*  
13 *baumannii* (CRAB) after room privatization in an intensive care unit. *Journal of Hospital Infection*. 2022 Mar 1;121:14–21.  
14  
15 63. Kainiemi E, Hongisto P, Lehtonen L, Pape B, Axelin A. Effects of single family room architecture on parent–infant closeness and family  
16 centered care in neonatal environments—a single-center pre–post study. *J Perinatol*. 2021 Sep;41(9):2244–51.  
17  
18 64. Kinnula SE, Renko M, Tapiainen T, Knuutinen M, Uhari M. Hospital-associated infections during and after care in a paediatric infectious  
19 disease ward. *J Hosp Infect*. 2008 Apr;68(4):334–40.  
20  
21 65. Kinnula S, Buettcher M, Tapiainen T, Renko M, Vepsäläinen K, Lantto R, et al. Hospital-associated infections in children: a prospective  
22 post-discharge follow-up survey in three different paediatric hospitals. *The Journal of hospital infection*. 2012 Jan;80(1):17–24.  
23  
24 66. Knight S, Singh I. Profile of inpatient falls in patients with dementia: A prospective comparative study between 100% single rooms and  
25 traditional multibedded wards. *Journal of Clinical Gerontology and Geriatrics*. 2016 Sep;7(3):87–92.  
26  
27 67. KOSUGE R, KOBAYASHI K, KAKEHI A. COMPARATIVE STUDIES ON HOSPITAL-BED MANAGEMENT BETWEEN ALL SINGLE-ROOM WARDS  
28 AND MIXED MULTI-BED ROOM WARDS. *Journal of Architecture and Planning (Transactions of AIJ)*. 2013;78(686):765–73.  
29  
30 68. Labarère J, Fourny M, Jean-Phillippe V, Marin-Pache S, Patrice F. Refinement and validation of a French in-patient experience  
31 questionnaire. *International Journal of Health Care Quality Assurance*. 2004 Jan 1;17(1):17–25.  
32  
33 69. Lawson B, Phiri M. Hospital design. Room for improvement. *The Health Service Journal*. 2000 Jan 1;110(5688):24–6.  
34  
35 70. Lazar I, Abukaf H, Sofer S, Peled N, Leibovitz E. Impact of Conversion from an Open Ward Design Paediatric Intensive Care Unit  
36 Environment to All Isolated Rooms Environment on Incidence of Bloodstream Infections and Antibiotic Resistance in Southern Israel  
37 (2000 to 2008) [Internet]. [cited 2022 Jul 11]. Available from:  
38 [https://journals.sagepub.com/doi/10.1177/0310057X1504300106?url\\_ver=Z39.88-  
39 2003&rfr\\_id=ori:rid:crossref.org&rfr\\_dat=cr\\_pub%20%200pubmed](https://journals.sagepub.com/doi/10.1177/0310057X1504300106?url_ver=Z39.88-2003&rfr_id=ori:rid:crossref.org&rfr_dat=cr_pub%20%200pubmed)  
40  
41 71. Lehtonen L, Lee SK, Kusuda S, Lui K, Norman M, Bassler D, et al. Family Rooms in Neonatal Intensive Care Units and Neonatal Outcomes:  
42 An International Survey and Linked Cohort Study. *The Journal of Pediatrics*. 2020 Nov;226:112-117.e4.  
43  
44 72. Lester BM, Hawes K, Abar B, Sullivan M, Miller R, Bigsby R, et al. Single-family room care and neurobehavioral and medical outcomes in  
45 preterm infants. *Pediatrics*. 2014;134(4):754–60.  
46  
47

73. Lester BM, Salisbury AL, Hawes K, Dansereau LM, Bigsby R, Laptook A, et al. 18-Month Follow-Up of Infants Cared for in a Single-Family Room Neonatal Intensive Care Unit. *The Journal of pediatrics*. 2016;177:84–9.
74. Liu LX, Mozafarinia M, Axelin A, Feeley N. Parents' Experiences of Support in NICU Single-Family Rooms. *Neonatal Netw*. 2019 Mar 1;38(2):88–97.
75. Lorenz SG, Dreher HM. Hospital Room Design and Health Outcomes of the Aging Adult. *PA P E R S*. 2011;4(2):14.
76. Maben J, Griffiths P, Penfold C, Simon M, Pizzo E, Anderson J, et al. Evaluating a major innovation in hospital design: workforce implications and impact on patient and staff experiences of all single room hospital accommodation. *Health Services and Delivery Research*. 2015 Feb;3(3):1–304.
77. Maben J, Griffiths P, Penfold C, Simon M, Anderson JE, Robert G, et al. One size fits all? Mixed methods evaluation of the impact of 100% single-room accommodation on staff and patient experience, safety and costs. *BMJ quality & safety*. 2016 Apr 1;25(4):241–56.
78. Malcolm HA. Does privacy matter? Former patients discuss their perceptions of privacy in shared hospital rooms. *Nurs Ethics*. 2005 Mar;12(2):156–66.
79. Mattner F, Rüden AS, Mattner L, Chaberny IF, Ziesing S, Strueber M, et al. Thoracic organ transplantation may not increase the risk of bacterial transmission in intensive care units. *International Journal of Hygiene and Environmental Health*. 2007 Mar;210(2):139–45.
80. McDonald EG, Dendukuri N, Frenette C, Lee TC. Time-Series Analysis of Health Care–Associated Infections in a New Hospital With All Private Rooms. *JAMA Intern Med*. 2019 Nov 1;179(11):1501.
81. McKeown K, Haase T, Pratschke J, Twomey S, Donovan H, Engling F. Determinants of care outcomes for patients who die in hospital in Ireland: a retrospective study. *BMC Palliat Care*. 2015 Dec;14(1):11.
82. Mental Welfare Commission for Scotland. *Psychiatr bull*. 1991 Apr;15(4):254–5.
83. Meyer TJ, Eveloff SE, Bauer MS, Schwartz WA, Hill NS, Millman RP. Adverse Environmental Conditions in the Respiratory and Medical ICU Settings. *Chest*. 1994 Apr;105(4):1211–6.
84. Milford C, Zapalo B, Davis G. Transition to an Individual-Room NICU Design: Process and Outcome Measures. *Neonatal Network*. 2008 Sep;27(5):299–305.
85. Miller NO, Friedman SB, Coupey SM. Adolescent preferences for rooming during hospitalization. *Journal of Adolescent Health*. 1998 Aug;23(2):89–93.
86. Monson BB, Eaton-Rosen Z, Kapur K, Liebenthal E, Brownell A, Smyser CD, et al. Differential Rates of Perinatal Maturation of Human Primary and Nonprimary Auditory Cortex. *eNeuro*. 2018 Jan;5(1):ENEURO.0380-17.2017.
87. Morgan H. Single and shared accommodation for young patients in hospital [Internet]. 2010 [cited 2022 Jul 20]. Available from: <https://journals.rcni.com/doi/abs/10.7748/paed2010.10.22.8.20.c7997>

- 1
- 2
- 3
- 4
- 5 88. Munier-Marion E, Bénet T, Régis C, Lina B, Morfin F, Vanhems P. Hospitalization in double-occupancy rooms and the risk of hospital-
- 6 acquired influenza: a prospective cohort study. *Clinical Microbiology and Infection*. 2016 May;22(5):461.e7-461.e9.
- 7 89. Nahas S, Patel A, Duncan J, Nicholl J, Nathwani D. Patient Experience in Single Rooms Compared with the Open Ward for Elective
- 8 Orthopaedic Admissions. *Musculoskeletal Care*. 2016 Mar;14(1):57–61.
- 9 90. Nash D, O'Rourke T, Memmott P, Haynes M. Indigenous Preferences for Inpatient Rooms in Australian Hospitals: A Mixed-Methods
- 10 Study in Cross-Cultural Design. *HERD*. 2021 Jan;14(1):174–89.
- 11 91. Nassery W, Landgren K. Parents' Experience of Their Sleep and Rest When Admitted to Hospital with Their Ill Child: A Qualitative Study.
- 12 *Comprehensive Child and Adolescent Nursing*. 2019 Oct 2;42(4):265–79.
- 13 92. OECD, World Health Organization. Improving Healthcare Quality in Europe: Characteristics, Effectiveness and Implementation of
- 14 Different Strategies [Internet]. OECD; 2019 [cited 2022 Jul 11]. Available from: [https://www.oecd-ilibrary.org/social-issues-migration-](https://www.oecd-ilibrary.org/social-issues-migration-health/improving-healthcare-quality-in-europe_b11a6e8f-en)
- 15 [health/improving-healthcare-quality-in-europe\\_b11a6e8f-en](https://www.oecd-ilibrary.org/social-issues-migration-health/improving-healthcare-quality-in-europe_b11a6e8f-en)
- 16 93. Olson ME, Smith MJ. An evaluation of single-room maternity care. *The Health Care Manager*. 1992 Sep;11(1):43–9.
- 17 94. O'Neill L, Park SH, Rosinia F. The role of the built environment and private rooms for reducing central line-associated bloodstream
- 18 infections. Kamolz LP, editor. *PLoS ONE*. 2018 Jul 27;13(7):e0201002.
- 19 95. Park SH, Stockbridge EL, Miller TL, O'Neill L. Private patient rooms and hospital-acquired methicillin-resistant *Staphylococcus aureus*: A
- 20 hospital-level analysis of administrative data from the United States. *PLOS ONE*. 2020 Jul 9;15(7):e0235754.
- 21 96. Pease NJ, Finlay IG. Do patients and their relatives prefer single cubicles or shared wards? *Palliat Med*. 2002 Jul;16(5):445–6.
- 22 97. Persson E, Määttä S. To provide care and be cared for in a multiple-bed hospital room. *Scandinavian Journal of Caring Sciences*. 2012
- 23 Dec 1;26(4):663–70.
- 24 98. Persson E, Anderberg P, Kristensson Ekwall A. A room of one's own--Being cared for in a hospital with a single-bed room design.
- 25 *Scandinavian journal of caring sciences*. 2015 Jun 1;29(2):340–6.
- 26 99. Pilmis B, Billard-Pomares T, Martin M, Clarempuy C, Lemezo C, Saint-Marc C, et al. Can environmental contamination be explained by
- 27 particular traits associated with patients? *Journal of Hospital Infection*. 2020 Mar;104(3):293–7.
- 28 100. Pineda RG, Stransky KE, Rogers C, Duncan MH, Smith GC, Neil J, et al. The single-patient room in the NICU: maternal and family effects.
- 29 *Journal of perinatology : official journal of the California Perinatal Association*. 2012 Jul;32(7):545–51.
- 30 101. Poncette AS, Wunderlich MM, Spies C, Heeren P, Vorderwülbecke G, Salgado E, et al. Patient Monitoring Alarms in an Intensive Care
- 31 Unit: Observational Study With Do-It-Yourself Instructions. *J Med Internet Res*. 2021 May 28;23(5):e26494.
- 32 102. Puumala SE, Rich RK, Roy L, Reynolds R, Jimenez FE, Opollo JG, et al. Single-family room neonatal intensive care unit design: do patient
- 33 outcomes actually change? | *Journal of Perinatology* [Internet]. [cited 2022 Jul 11]. Available from:
- 34 <https://www.nature.com/articles/s41372-019-0584-6>
- 35
- 36
- 37
- 38
- 39
- 40
- 41

103. Pyrke RJL, McKinnon MC, McNeely HE, Ahern C, Langstaff KL, Bieling PJ. Evidence-Based Design Features Improve Sleep Quality Among Psychiatric Inpatients. *HERD*. 2017 Oct;10(5):52–63.
104. Quach C, Shah R, Rubin LG. Burden of Healthcare-Associated Viral Respiratory Infections in Children’s Hospitals. *Journal of the Pediatric Infectious Diseases Society*. 2018 Feb 19;7(1):18–24.
105. Real K, Fay L. Using Systems Theory to Examine Patient and Nurse Structures, Processes, and Outcomes in Centralized and Decentralized Units. :16.
106. Reed G, Schmid M. Nursing Implementation of Single-Room Maternity Care. *Journal of Obstetric, Gynecologic & Neonatal Nursing*. 1986 Sep;15(5):386–9.
107. Reid J, Wilson K, Anderson KE, Maguire CPJ. Older inpatients’ room preference: single versus shared accommodation. *Age and Ageing*. 2015 Mar;44(2):331–3.
108. Roos AKØ, Skaug EA, Grøndahl VA, Helgesen AK. Trading company for privacy: A study of patients’ experiences. *Nurs Ethics*. 2020 Jun;27(4):1089–102.
109. Rosbergen ICM, Tonello I, Clark RA, Grimley RS. Does hospital design impact on patient activity levels and time spent alone? *Disability and Rehabilitation*. 2022 Jun 19;44(13):3173–80.
110. Rowlands J, Noble S. How does the environment impact on the quality of life of advanced cancer patients? A qualitative study with implications for ward design. *Palliat Med*. 2008 Sep;22(6):768–74.
111. Sadatsafavi H, Niknejad B, Zadeh R, Sadatsafavi M. Do cost savings from reductions in nosocomial infections justify additional costs of single-bed rooms in intensive care units? A simulation case study. *J Crit Care*. 2016 Feb;31(1):194–200.
112. Sadatsafavi H, Niknejad B, Shepley M, Sadatsafavi M. Probabilistic Return-on-Investment Analysis of Single-Family Versus Open-Bay Rooms in Neonatal Intensive Care Units—Synthesis and Evaluation of Early Evidence on Nosocomial Infections, Length of Stay, and Direct Cost of Care. *Journal of Intensive Care Medicine*. 2019 Feb 1;34(2):115–25.
113. Sakr N, Hallit S, Mattar H. Incidence of and Factors Associated with New-Onset Insomnia Among Lebanese Hospitalised Patients: A single-centre study. *Sultan Qaboos Univ Med J*. 2021 Jun 21;21(2):e210-220.
114. Schalkers I, Dedding CWM, Bunders JFG. ‘[I would like] a place to be alone, other than the toilet’ - Children’s perspectives on paediatric hospital care in the Netherlands. *Health Expect*. 2015 Dec;18(6):2066–78.
115. Scottish Intercollegiate Guidelines Network. Sign 50: a guideline developer’s handbook. Healthcare Improvement Scotland; 2014.
116. Singh I, Okeke J, Edwards C. Outcome of in-patient falls in hospitals with 100% single rooms and multi-bedded wards. *Age and Ageing*. 2015;44(6):1032–5.
117. Singh I. (PDF) Loneliness among Older People in Hospitals: A Comparative Study between Single Rooms and Multi- Bedded Wards to Evaluate Current Health Service within the Same Organisation [Internet]. 2016 [cited 2022 May 4]. Available from:

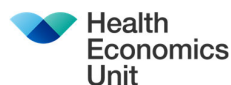

- 1  
2  
3  
4  
5 [https://www.researchgate.net/publication/304495269\\_Loneliness\\_among\\_Older\\_People\\_in\\_Hospitals\\_A\\_Comparative\\_Study\\_between\\_Single\\_Rooms\\_and\\_Multi\\_Bedded\\_Wards\\_to\\_Evaluate\\_Current\\_Health\\_Service\\_within\\_the\\_Same\\_Organisation](https://www.researchgate.net/publication/304495269_Loneliness_among_Older_People_in_Hospitals_A_Comparative_Study_between_Single_Rooms_and_Multi_Bedded_Wards_to_Evaluate_Current_Health_Service_within_the_Same_Organisation)
- 6  
7 118. Søndergaard SF, Beedholm K, Kolbæk R, Frederiksen K. Patients' and Nurses' Experiences of All Single-Room Hospital Accommodation: A  
8 Scoping Review. *HERD*. 2022 Jan;15(1):292–314.  
9  
10 119. Song X, Soghier L, Floyd TT, Harris TR, Short BL, DeBiasi RL. Reassessing the need for active surveillance of extended-spectrum beta-  
11 lactamase-producing Enterobacteriaceae in the neonatal intensive care population. *Infect Control Hosp Epidemiol*. 2018  
12 Dec;39(12):1436–41.  
13 120. Stelwagen M, van Kempen A, Westmaas A, Vet E, Scheele F. Parents' Experiences With a Model of Integrated Maternity and Neonatal  
14 Care Designed to Empower Parents. *Journal of Obstetric, Gynecologic & Neonatal Nursing*. 2021 Mar;50(2):181–92.  
15 121. Stevens DC, Helseth CC, Khan MA, Munson DP, Reid EJ. A Comparison of Parent Satisfaction in an Open-Bay and Single-Family Room  
16 Neonatal Intensive Care Unit. *HERD*. 2011 Apr;4(3):110–23.  
17 122. Stevens DC, Helseth CC, Thompson PA, Pottala JV, Khan MA, Munson DP. A Comprehensive Comparison of Open-Bay and Single-Family-  
18 Room Neonatal Intensive Care Units at Sanford Children's Hospital. *HERD*. 2012 Jul;5(4):23–39.  
19 123. Stevens DC, Thompson PA, Helseth CC, Hsu B, Khan MA, Munson DP. A comparison of the direct cost of care in an open-bay and single-  
20 family room NICU. *Journal of Perinatology* 2014 34:11. 2014 Sep 25;34(11):830–5.  
21 124. Stiller A, Schröder C, Gropmann A, Schwab F, Behnke M, Geffers C, et al. ICU ward design and nosocomial infection rates: a cross-  
22 sectional study in Germany. *Journal of Hospital Infection*. 2017 Jan;95(1):71–5.  
23 125. Swanson JR, Peters C, Lee BH. NICU redesign from open ward to private room: a longitudinal study of parent and staff perceptions. *J*  
24 *Perinatol*. 2013 Jun;33(6):466–9.  
25 126. Tandberg BS, Frøslie KF, Flacking R, Grundt H, Lehtonen L, Moen A. Parent-Infant Closeness, Parents' Participation, and Nursing Support  
26 in Single-Family Room and Open Bay NICUs. *J Perinat Neonatal Nurs*. 2018 Dec;32(4):E22–32.  
27 127. Tandberg BS, Flacking R, Markestad T, Grundt H, Moen A. Parent psychological wellbeing in a single-family room versus an open bay  
28 neonatal intensive care unit. *PLOS ONE*. 2019 Nov 1;14(11):e0224488.  
29 128. Tandberg BS, Frøslie KF, Markestad T, Flacking R, Grundt H, Moen A. Single-family room design in the neonatal intensive care unit did  
30 not improve growth. *Acta Paediatrica*. 2019 Jun 1;108(6):1028–35.  
31 129. Taylor E, Card AJ, Piatkowski M. Single-Occupancy Patient Rooms: A Systematic Review of the Literature Since 2006. *HERD*. 2018  
32 Jan;11(1):85–100.  
33 130. Tegnestedt C, Günther A, Reichard A, Bjurström R, Alvarsson J, Martling CR, et al. Levels and sources of sound in the intensive care unit -  
34 an observational study of three room types: Levels and sources of sound in a multidisciplinary ICU. *Acta Anaesthesiol Scand*. 2013  
35 Sep;57(8):1041–50.  
36  
37  
38  
39  
40  
41

131. Teltsch DY, Hanley J, Loo V, Goldberg P, Gursahaney A, Buckeridge DL. Infection Acquisition Following Intensive Care Unit Room Privatization. *Arch Intern Med* [Internet]. 2011 Jan 10 [cited 2022 Jul 14];171(1). Available from: <http://archinte.jamanetwork.com/article.aspx?doi=10.1001/archinternmed.2010.469>
132. Toivonen M, Lehtonen L, Löyttyniemi E, Axelin A. Effects of single-family rooms on nurse-parent and nurse-infant interaction in neonatal intensive care unit. *Early Human Development*. 2017 Mar 1;106–107:59–62.
133. Vaisman A, Jula M, Wagner J, Winston LG. Examining the association between hospital-onset *Clostridium difficile* infection and multiple-bed room exposure: a case-control study. *Infect Control Hosp Epidemiol*. 2018 Sep;39(9):1068–73.
134. van de Glind I, van Dulmen S, Goossensen A. Physician–patient communication in single-bedded versus four-bedded hospital rooms. *Patient Education and Counseling*. 2008 Nov 1;73(2):215–9.
135. van der Hoeven A, Bekker V, Jansen SJ, Saccoccia B, Berkhout RJM, Lopriore E, et al. Impact of transition from open bay to single room design neonatal intensive care unit on multidrug-resistant organism colonization rates. *Journal of Hospital Infection*. 2022 Feb;120:90–7.
136. Van Enk RA, Steinberg F. Comparison of Private Room with Multiple-Bed Ward Neonatal Intensive Care Unit Environments. *HERD*. 2011 Oct;5(1):52–63.
137. van Veenendaal NR, van der Schoor SRD, Heideman WH, Rijnhart JJM, Heymans MW, Twisk JWR, et al. Family integrated care in single family rooms for preterm infants and late-onset sepsis: a retrospective study and mediation analysis. *Pediatr Res*. 2020 Oct;88(4):593–600.
138. van Veenendaal NR, van der Schoor SRD, Broekman BFP, de Groof F, van Laerhoven H, van den Heuvel MEN, et al. Association of a Family Integrated Care Model With Paternal Mental Health Outcomes During Neonatal Hospitalization. *JAMA Netw Open*. 2022 Jan 24;5(1):e2144720.
139. Vietri NJ, Dooley DP, Davis CE, Longfield JN, Meier PA, Whelen AC. The effect of moving to a new hospital facility on the prevalence of methicillin-resistant *Staphylococcus aureus*. *Am J Infect Control*. 2004 Aug;32(5):262–7.
140. Vohr B, McGowan E, McKinley L, Tucker R, Keszler L, Alksninis B. Differential Effects of the Single-Family Room Neonatal Intensive Care Unit on 18- to 24-Month Bayley Scores of Preterm Infants. *J Pediatr*. 2017 Jun;185:42-48.e1.
141. Voigt J, Mosier M, Darouiche R. Private Rooms in Low Acuity Settings: A Systematic Review of the Literature. *HERD*. 2018 Jan;11(1):57–74.
142. Walsh WF, McCullough KL, White RD. Room for improvement: nurses’ perceptions of providing care in a single room newborn intensive care setting. *Adv Neonatal Care*. 2006 Oct;6(5):261–70.
143. Washam MC, Ankrum A, Haberman BE, Staat MA, Haslam DB. Risk Factors for *Staphylococcus aureus* Acquisition in the Neonatal Intensive Care Unit: A Matched Case-Case-Control Study. *Infect Control Hosp Epidemiol*. 2018 Jan;39(1):46–52.



1  
2  
3  
4  
5 144. Watson J, DeLand M, Gibbins S, MacMillan York E, Robson K. Improvements in Staff Quality of Work Life and Family Satisfaction  
6 Following the Move to Single-Family Room NICU Design. *Advances in Neonatal Care*. 2014 Apr;14(2):129–36.  
7  
8 145. Zaal IJ, Spruyt CF, Peelen LM, van Eijk MMJ, Wientjes R, Schneider MME, et al. Intensive care unit environment may affect the course of  
9 delirium. *Intensive Care Med*. 2013 Mar;39(3):481–8.

10  
11  
12  
13  
14  
15  
16  
17  
18  
19  
20  
21  
22  
23  
24  
25  
26  
27  
28  
29  
30  
31  
32  
33  
34  
35  
36  
37  
38  
39  
40  
41  
42  
43  
44  
45  
46  
47

For peer review only



## Appendix: Search Strategy

### 1. Searches

We ran systematic searches of Medline via PubMed and Embase via embase.com and supplemented these databases with additional searches of Google Scholar and the National Institute for Health and Care Excellence website using the search strategy below.

#### *Embase search strategy*

|   | Search terms                                                                                                                                             | Number of hits (17 Feb 2022) |
|---|----------------------------------------------------------------------------------------------------------------------------------------------------------|------------------------------|
| 1 | 'hospital design'/exp OR 'hospital design' OR 'hospital management'/exp OR 'hospital management' OR 'health care facility'/exp OR 'health care facility' | 2,538,404                    |
| 2 | (single OR multi*) NEAR/2 (room* OR bay* OR bed* OR accommodation)                                                                                       | 6,553                        |
| 3 | 1 AND 2                                                                                                                                                  | 2,005                        |

#### *PubMed search strategy*

|   | Search terms                                                                                                       | Number of hits (17 Feb 2022) |
|---|--------------------------------------------------------------------------------------------------------------------|------------------------------|
| 1 | "Hospital Design and Construction"[Mesh] OR "Hospital Administration"[Mesh] OR "Health Facility Environment"[Mesh] | 289,082                      |
| 2 | ((single OR multiple) AND (room OR room* OR bay OR bays OR bed OR beds OR accommodation))                          | 70,205                       |
| 3 | 1 AND 2                                                                                                            | 2,599                        |

#### *Google scholar search strategy*

|   | Search terms                                                                      | Number of hits (14 Feb 2022) |
|---|-----------------------------------------------------------------------------------|------------------------------|
| 1 | Hospital AND ("single room" OR "multiple room" OR "single bed" OR "multiple bay") | 42                           |

#### *NICE website*

|   | Search terms  | Number of hits (14 Feb 2022) |
|---|---------------|------------------------------|
| 1 | "single room" | 215                          |

We have used NICE's online Evidence Search tool (<https://www.evidence.nhs.uk>).

This search strategy yields **4,563 abstracts for screening** after deduplication, once the additional sources have been included.

## 2. Inclusion criteria

The inclusion criteria for the review are set out below.

| Criterion                    | Inclusion criterion                                                                                                                                                                                                                                                                                                                                                                                                                                                                                                      | Exclusion criterion                                                                                                                                                                                                                          |
|------------------------------|--------------------------------------------------------------------------------------------------------------------------------------------------------------------------------------------------------------------------------------------------------------------------------------------------------------------------------------------------------------------------------------------------------------------------------------------------------------------------------------------------------------------------|----------------------------------------------------------------------------------------------------------------------------------------------------------------------------------------------------------------------------------------------|
| <b>Population</b>            | Adults, adolescents or children who are inpatients in an acute hospital for more than 24 hours<br>Includes:<br>Those requiring level 0 or 1 care<br>Neonates, children and young adults (everyone under age 18)<br>Pregnant/labouring women<br>Vulnerable adults (those requiring assistance while living in the community)<br>Those with dementia or delirium<br>Those requiring level 2 or 3 care<br>Those primarily receiving rehabilitation<br>Those admitted for elective care<br>Those admitted for emergency care | Patients admitted to long-stay, community or other non-acute hospitals<br>Patients admitted as day cases to an acute hospital<br>Patients attending Accident and Emergency or medical assessment units but not admitted to an acute hospital |
| <b>Interventions</b>         | Staying in a single room for the whole admission                                                                                                                                                                                                                                                                                                                                                                                                                                                                         | Patients who are relocated to a single room during their admission (e.g. for isolation due to contracting infectious disease or for terminal care)                                                                                           |
| <b>Comparison</b>            | Staying in a multi-bed bay or room                                                                                                                                                                                                                                                                                                                                                                                                                                                                                       | No direct comparison                                                                                                                                                                                                                         |
| <b>Outcomes</b>              | In-hospital mortality<br>30-day, or longer, mortality<br>Morbidity such as falls, deterioration, new pressure ulcers and additional diagnoses<br>Experience of patient safety incidents<br>Hospital-acquired infection<br>Quantitative, qualitative and patient-reported measures of experience<br>Length of stay<br>Cost of stay<br>Experience of accommodation change during admission, or number of bed moves during admission<br>Impact on caregivers and family of dependent patient                                | Non-clinically relevant outcomes<br>Impact on healthcare professionals and support staff                                                                                                                                                     |
| <b>Study methodology</b>     | Comparative clinical trials and observational studies<br>Systematic reviews of relevant studies<br>Study protocols: index separately                                                                                                                                                                                                                                                                                                                                                                                     | Non-comparative observational studies<br>Narrative reviews, opinion pieces, letters, editorials<br>Conference abstracts with no relevant data                                                                                                |
| <b>Study size</b>            | Any                                                                                                                                                                                                                                                                                                                                                                                                                                                                                                                      |                                                                                                                                                                                                                                              |
| <b>Language and location</b> | Any                                                                                                                                                                                                                                                                                                                                                                                                                                                                                                                      |                                                                                                                                                                                                                                              |

### 3. Studies excluded at full text screening

| Citation                                                                                                                                                                                                                                                                                                                                                                           | Reason for exclusion                 |
|------------------------------------------------------------------------------------------------------------------------------------------------------------------------------------------------------------------------------------------------------------------------------------------------------------------------------------------------------------------------------------|--------------------------------------|
| Adabi, G. <i>et al.</i> (2019). Barriers to sleep in patients hospitalised with an acute exacerbation of chronic obstructive pulmonary disease. <i>J Sleep Res.</i> 28(SUPPL 1).                                                                                                                                                                                                   | Outcome: No relevant data reported   |
| Alzheimer's Disease International (2020) World Alzheimer Report 2020 Design Dignity Dementia: dementia-related design and the built environment, Volume 1 <a href="https://www.alzint.org/u/WorldAlzheimerReport2020Vol1.pdf">https://www.alzint.org/u/WorldAlzheimerReport2020Vol1.pdf</a>                                                                                        | Outcome: No relevant data reported   |
| Baillie, J. (2015). Hospitals single-room design evaluated. <i>Health Estate</i> 69(1): 27-30.                                                                                                                                                                                                                                                                                     | Irretrievable                        |
| Bernhardt, J. and Cumming, T. (2013). The elephant in the single room debate: keeping patients active. <i>BMJ Clin Res Ed.</i> 347.                                                                                                                                                                                                                                                | Outcome: No relevant data reported   |
| Dean, E. (2010). Patient opinion divided on the introduction of single rooms. <i>Nurs Stand.</i> 24(40): 12-13.                                                                                                                                                                                                                                                                    | Outcome: No relevant data reported   |
| Dean, E. (2015). Study finds ideal ward has a mix of single rooms and multi-bed bays. <i>Nurs Stand.</i> 29(28): 11.                                                                                                                                                                                                                                                               | Outcome: No relevant data reported   |
| Dulny, G. <i>et al.</i> (2013). An analysis of risk factors of <i>Clostridium difficile</i> infection in patients hospitalized in the teaching hospital in 2008. <i>Przegląd epidemiologiczny</i> 67(3): 445-50, 547-51.                                                                                                                                                           | Intervention: No data on single room |
| Kelly, R. <i>et al.</i> (2019). The experience of person-centred practice in a 100% single-room environment in acute care settings-A narrative literature review. <i>J Clin Nurs.</i> 28(13-14): 2369-2385.                                                                                                                                                                        | Outcome: No relevant data reported   |
| Lerner, A. O. <i>et al.</i> (2019). Environmental contamination by carbapenem-resistant <i>Acinetobacter baumannii</i> : The effects of room type and cleaning methods. <i>Infect Control Hosp Epidemiol.</i> 41(2): 166-171.                                                                                                                                                      | Outcome: No relevant data reported   |
| Li, M. <i>et al.</i> (2020). Construction and application of three-dimensional evaluation model of single bed efficiency in hospital. <i>Chin J Hosp Admin:</i> 127-130.                                                                                                                                                                                                           | Irretrievable                        |
| Linqvist Leonardsen, AC <i>et al.</i> (2016). A qualitative study of patient experiences of decentralized acute healthcare services. <i>Scand J Prim Health Care</i> 34(3): 317-324.                                                                                                                                                                                               | Population: not acute hospital       |
| Mental Welfare Commission for Scotland (2015) Making progress: older functional assessment wards. <a href="https://www.mwscot.org.uk/sites/default/files/2019-06/making_progress_older_adult_functional_assessment_wards.pdf">https://www.mwscot.org.uk/sites/default/files/2019-06/making_progress_older_adult_functional_assessment_wards.pdf</a>                                | Outcome: No relevant data reported   |
| NIHR Evidence (2015) NIHR Alert: One size does not fit all – evaluating the move to a hospital with 100% single rooms. <a href="https://evidence.nihr.ac.uk/alert/one-size-does-not-fit-all-evaluating-the-move-to-a-hospital-with-100-single-rooms/">https://evidence.nihr.ac.uk/alert/one-size-does-not-fit-all-evaluating-the-move-to-a-hospital-with-100-single-rooms/</a>     | Secondary to Maben 2016 #1802        |
| NIHR Journals Library Health Services and Delivery Research (2015) Evaluating a major innovation in hospital design: workforce implications and impact on patient and staff experiences of all single room hospital accommodation. <a href="https://www.journalslibrary.nihr.ac.uk/hsdr/hsdr03030/#/abstract">https://www.journalslibrary.nihr.ac.uk/hsdr/hsdr03030/#/abstract</a> | Duplicate of Maben 2015 #1804        |
| Oliver, D. (2021). David Oliver: Should single rooms be the default for NHS inpatients? <i>BMJ</i> 375:n2612.                                                                                                                                                                                                                                                                      | Outcome: No relevant data reported   |
| Pennington, H. and Isles, C. (2013). Should hospitals provide all patients with single rooms? <i>BMJ</i> 347: f5695.                                                                                                                                                                                                                                                               | Outcome: No relevant data reported   |

| Citation                                                                                                                                                                                                                                                                                                                                                                                                                                                                                                                       | Reason for exclusion                                    |
|--------------------------------------------------------------------------------------------------------------------------------------------------------------------------------------------------------------------------------------------------------------------------------------------------------------------------------------------------------------------------------------------------------------------------------------------------------------------------------------------------------------------------------|---------------------------------------------------------|
| Ali, E. (2020) Single-room maternity care: Systematic review and narrative synthesis. <i>Nurs Open</i> . 7(6):1661-1670.<br><a href="https://pubmed.ncbi.nlm.nih.gov/33072349">https://pubmed.ncbi.nlm.nih.gov/33072349</a>                                                                                                                                                                                                                                                                                                    | SLR: citation chase                                     |
| Royal College of Psychiatrists (2020) Next steps for funding mental healthcare in England: Infrastructure. Version 2 <a href="https://www.rcpsych.ac.uk/docs/default-source/improving-care/better-mh-policy/policy/next-steps-for-funding-mental-healthcare---infrastructure-royal-college-of-psychiatrists-august-2020.pdf">https://www.rcpsych.ac.uk/docs/default-source/improving-care/better-mh-policy/policy/next-steps-for-funding-mental-healthcare---infrastructure-royal-college-of-psychiatrists-august-2020.pdf</a> | Outcome: No relevant data reported                      |
| Russo, PL <i>et al.</i> (2018). Establishing the prevalence of healthcare-associated infections in Australian hospitals: Protocol for the Comprehensive Healthcare Associated Infection National Surveillance (CHAINS) study. <i>BMJ Open</i> 8(11).                                                                                                                                                                                                                                                                           | Outcome: No relevant data reported                      |
| Semret, M. <i>et al.</i> (2016). Cleaning the grey zones of hospitals: A prospective, crossover, interventional study. <i>Am J Infect Control</i> 44(12): 1582-1588.                                                                                                                                                                                                                                                                                                                                                           | Intervention: No data on single room                    |
| Sengupta, S. <i>et al.</i> (2021). Not All Multi.drug Resistant Organism (MDRO)S are Alike-Lessons from Candida Auris in Singapore. <i>Antimicrobial Resistance and Infection Control</i> 10(SUPPL 2).                                                                                                                                                                                                                                                                                                                         | Outcome: No relevant data reported                      |
| Shannon, MM. <i>et al.</i> (2019). Can the physical environment itself influence neurological patient activity? <i>Disabil Rehabil.</i> 41(10): 1177-1189.                                                                                                                                                                                                                                                                                                                                                                     | Intervention: No data on single room                    |
| Simon, M. <i>et al.</i> (2016). Is single room hospital accommodation associated with differences in healthcare-associated infection, falls, pressure ulcers or medication errors? A natural experiment with non-equivalent controls. <i>J Health Serv Res Policy</i> 21(3): 147-155.                                                                                                                                                                                                                                          | Secondary publication to Maben 2016, no additional data |
| Teo, R. <i>et al.</i> (2015). Patients' preference: Single rooms or shared wards? <i>Scottish Med J</i> 59(4): e40.                                                                                                                                                                                                                                                                                                                                                                                                            | Outcome: No relevant data reported                      |
| Welsh Government (2020) National care review of NHS learning disability hospitals provision <a href="https://gov.wales/sites/default/files/publications/2020-03/national-care-review-of-learning-disabilities-hospital-inpatient-provision.pdf">https://gov.wales/sites/default/files/publications/2020-03/national-care-review-of-learning-disabilities-hospital-inpatient-provision.pdf</a>                                                                                                                                  | Outcome: No relevant data reported                      |
| Fairhall, K. <i>et al.</i> (2009). Single-bed versus multi-bed hospital rooms: The case for patient safety. <i>World Health Design</i> 7: 57-61.                                                                                                                                                                                                                                                                                                                                                                               | Irretrievable                                           |
| BaHammam, A. (2006). Sleep quality of patients with acute myocardial infarction outside the ccu environment: A preliminary study. <i>Med Sci Monit</i> 12(4): CR168-CR172.                                                                                                                                                                                                                                                                                                                                                     | Outcome: No relevant data reported                      |
| Harris, S., Farren, M., Janssen, P., Klein, M., & Lee, S. (2004). Single room maternity care offers an efficient and physician friendly environment, without compromising perinatal outcomes. <i>J Obstet Gynecol Canada</i> 26, 633-640.                                                                                                                                                                                                                                                                                      | Irretrievable                                           |
| Ishii, H. <i>et al.</i> (2007). Advantages of silent and air-conditioned environment on polysomnography. <i>Respir Circul</i> 55(2): 233-236.                                                                                                                                                                                                                                                                                                                                                                                  | Irretrievable                                           |
| Isles, LF., Flynn, R., & Isles, C. (2009). Patient preferences for single rooms or shared accommodation in a district general hospital. <i>Scottish Med J.</i> 54, 5-8.                                                                                                                                                                                                                                                                                                                                                        | DUPLICATE                                               |
| Jones, R. <i>et al.</i> (2016). The effects of single-family rooms on parenting behavior and maternal psychological factors. <i>J Obstet Gynecol Neonatal Nurs</i> 45(3): 359-370.                                                                                                                                                                                                                                                                                                                                             | Irretrievable                                           |
| Feeley, N. <i>et al.</i> (2020). A comparative study of mothers of infants hospitalized in an open ward neonatal intensive care unit and a combined pod and single-family room design. <i>BMC Pediatrics</i> 20(1).                                                                                                                                                                                                                                                                                                            | Outcome: No relevant data reported                      |
| Herr, CE. <i>et al.</i> (2003). Additional costs for preventing the spread of methicillin-resistant <i>Staphylococcus aureus</i> and a strategy for reducing these costs on a surgical ward. <i>Infect Control Hosp Epidemiol</i> 24(9): 673-678.                                                                                                                                                                                                                                                                              | Intervention: No data on single room                    |

| Citation                                                                                                                                                                                                                                                                                                                                                                                           | Reason for exclusion                       |
|----------------------------------------------------------------------------------------------------------------------------------------------------------------------------------------------------------------------------------------------------------------------------------------------------------------------------------------------------------------------------------------------------|--------------------------------------------|
| Hurst, K. (2009). Do single rooms require more staff than other wards? <i>Nurs Stand</i> 24(4): 16.                                                                                                                                                                                                                                                                                                | Population: only data is on staff workload |
| Jobe, AH. (2017). The single-family room neonatal intensive care unit – critical for improving outcomes? <i>J Pediatr</i> 185: 10-12.                                                                                                                                                                                                                                                              | Outcome: No relevant data reported         |
| Joshi, R. <i>et al.</i> (2018). Does the architectural layout of a NICU affect alarm pressure? A comparative clinical audit of a single-family room and an open bay area NICU using a retrospective study design. <i>BMJ Open</i> 8(6): e022813.                                                                                                                                                   | Outcome: No relevant data reported         |
| Langley, JM. and Hanakowski, M. (2000). Variation in risk for nosocomial chickenpox after inadvertent exposure. <i>J Hosp Infect</i> 44(3): 224-226.                                                                                                                                                                                                                                               | Outcome: No relevant data reported         |
| McKinley, LT. <i>et al.</i> (2022). Implementation of a nutrition care bundle and improved weight gain of extremely preterm infants to 36 weeks postmenstrual age. <i>J Pediatr</i> 241: 42-47.e42.                                                                                                                                                                                                | Outcome: No relevant data reported         |
| Mental Welfare Commission for Scotland (2018) Young person monitoring report 2017-2018 <a href="https://www.mwscot.org.uk/sites/default/files/2019-06/young_person_monitoring_report_2017-18.pdf">https://www.mwscot.org.uk/sites/default/files/2019-06/young_person_monitoring_report_2017-18.pdf</a>                                                                                             | Outcome: No relevant data reported         |
| National Nursing Research Unit (2009) Policy + Issue 17: Splendid Isolation? The pros and cons of single occupancy rooms for the NHS <a href="https://www.kcl.ac.uk/nmpc/research/nuru/policy/policy-plus-issues-by-theme/hownursingcareisdelivered/policyissue17.pdf">https://www.kcl.ac.uk/nmpc/research/nuru/policy/policy-plus-issues-by-theme/hownursingcareisdelivered/policyissue17.pdf</a> | METHOD                                     |
| Pellikka, HK. <i>et al.</i> (2020). Finnish parents' responsibilities for their infant's care when they stayed in a single family room in a neonatal intensive care unit. <i>J Pediatr Nurs</i> 53: e28-e34.                                                                                                                                                                                       | Outcome: No relevant data reported         |
| Rose, P. and Blythe, S. (2008). Use of single rooms on the children's ward: Part 1. <i>Paediatr Nurs</i> 20(10): 13-17.                                                                                                                                                                                                                                                                            | SLR                                        |
| Rose, P. and Blythe, S. (2009). Use of single rooms on the children's ward, Part 2: Guideline for practice. <i>Paediatr Nurs</i> 21(1): 31-35.                                                                                                                                                                                                                                                     | Outcome: No relevant data reported         |
| Saha, S. <i>et al.</i> (2022). Mapping the impact of ICU design on patients, families and the ICU team: A scoping review. <i>J Crit Care</i> 67: 3-13.                                                                                                                                                                                                                                             | SLR                                        |
| Serval, AC. and Rideau Batista Novais, A. (2016). [Single-family rooms for neonatal intensive care units impacts on preterm newborns, families, and health-care staff. A systematic literature review]. <i>Arch Pediatr</i> 23(9): 921-926.                                                                                                                                                        | SLR                                        |
| Shahheidari, M. and Homer, C. (2012). Impact of the design of neonatal intensive care units on neonates, staff, and families: a systematic literature review. <i>J Perinat Neonat Nurs</i> 26(3): 260-266.                                                                                                                                                                                         | SLR                                        |
| Shin, JH. <i>et al.</i> (2000). Nosocomial cluster of <i>Candida lipolytica</i> fungemia in pediatric patients. <i>Eur J Clin Microbiol Infect Dis</i> 19(5): 344-349.                                                                                                                                                                                                                             | Intervention: No data on single room       |
| Soleimani, F. <i>et al.</i> (2020). Impacts of the design of a neonatal intensive care unit (single-family room care and open-ward care) on clinical and environmental outcomes. <i>Crescent J Med Biol Sci</i> 7(1): 1-6.                                                                                                                                                                         | SLR                                        |
| Stolker, JJ. <i>et al.</i> (2006). Are patients' views on seclusion associated with lack of privacy in the ward? <i>Arch Psychiatr Nurs</i> 20(6): 282-7.                                                                                                                                                                                                                                          | Outcome: No relevant data reported         |
| Tse, Y. (2013). Children thrive on companionship, not single rooms. <i>BMJ Clin. Res. Ed.</i> 347: f6335.                                                                                                                                                                                                                                                                                          | METHOD                                     |
| van de Glind, I. <i>et al.</i> (2007). Do patients in hospitals benefit from single rooms? A literature review. <i>Health Policy</i> 84(2-3): 153-161.                                                                                                                                                                                                                                             | SLR                                        |
| Van Eijk, M. <i>et al.</i> (2010). Quality and quantity of sleep in multiple versus single                                                                                                                                                                                                                                                                                                         | Outcome: No relevant data                  |

| Citation                                                                                                                                                                                                                                                                                                                              | Reason for exclusion                                                                |
|---------------------------------------------------------------------------------------------------------------------------------------------------------------------------------------------------------------------------------------------------------------------------------------------------------------------------------------|-------------------------------------------------------------------------------------|
| patient room intensive care units. <i>Intensive Care Med</i> 36: S189.                                                                                                                                                                                                                                                                | reported                                                                            |
| van Veenendaal, NR. <i>et al.</i> (2019). Hospitalising preterm infants in single family rooms versus open bay units: a systematic review and meta-analysis. <i>Lancet Child Adolesc Health</i> 3(3): 147-157.                                                                                                                        | SLR                                                                                 |
| van Veenendaal, NR. <i>et al.</i> (2020). Hospitalising preterm infants in single family rooms versus open bay units: A systematic review and meta-analysis of impact on parents. <i>EClinicalMedicine</i> 23.                                                                                                                        | SLR                                                                                 |
| Vohr, BR. (2019). The importance of parent presence and involvement in the single-family room and open-bay NICU. <i>Acta Paediatr</i> 108(6): 986-988.                                                                                                                                                                                | METHOD                                                                              |
| WHO Regional Office for Europe – WHO Europe (2009) Capital investment for health. Case studies from Europe (2009)<br><a href="https://www.euro.who.int/__data/assets/pdf_file/0014/43322/E92798.pdf">https://www.euro.who.int/__data/assets/pdf_file/0014/43322/E92798.pdf</a>                                                        | METHOD                                                                              |
| Yamaguchi, K. <i>et al.</i> (2019). A Study on Operation Architectural Design and Planning of Single-Room PICU in JAPAN Children’s Hospital. Sustainable Urban Environments: Research, Design and Planning for the Next 50 Years, EDRA.                                                                                               | Outcome: No relevant data reported                                                  |
| Bigazzi, E., Turrisi, L., Zagli, G., Pecile, P., Bonizzoli, M., Peris, A. (2010). Bay rooms vs single-bed rooms in intensive care unit nosocomial infections: a case-control study. <i>CritCare</i> 14(Suppl.1):P458-<br>P. <a href="http://dx.doi.org/10.1186/cc8690">http://dx.doi.org/10.1186/cc8690</a> [PubMedPMID: PMC2934264]. | Outcome: No relevant data reported                                                  |
| Stevens, D., Thompson, P., Helseth, C., Pottala, J., Khan, M., Munson, D. (2011). A comparison of outcomes of care in an open bay and single family room neonatal intensive care facility. <i>J Neonat Perinat Med</i> 4: 189–200.                                                                                                    | Irretrievable                                                                       |
| Gotlieb, JB. (2000). Understanding the effects of nurses, patients’ hospital rooms and patients’ perception of control on the perceived quality of a hospital. <i>Health Mark Q</i> 18:1–14.                                                                                                                                          | Outcome: No relevant data reported                                                  |
| Hamel, M., Zoutman, D., O’Callaghan, C. (2010). Exposure to hospital roommates as a risk factor for health care–associated infection. <i>Am J Infect Control</i> 38:173–81.                                                                                                                                                           | Intervention: No data on single room                                                |
| Heddema, ER. & van Benthem, BHB. (2011). Decline in incidence of <i>Clostridium difficile</i> infection after relocation to a new hospital building with single rooms. <i>J Hosp Infect</i> 79, 93–98.                                                                                                                                | METHOD                                                                              |
| Okeke, J., Daniel, J., Naseem, A. <i>et al.</i> (2013). Impact of all single rooms with ensuite facility in an acute care hospital in Wales (UK). <i>Age Ageing</i> 42(Suppl 3):iii1–11.                                                                                                                                              | Outcome: No relevant data reported                                                  |
| Okeke, J., Aithal, S., Edwards, C., Ramakrishna, S., & Singh, I. (2014). Outcome of inpatient falls in single bedded and multi-bedded bays. <i>Age Ageing</i> 43, ii1–ii11. <a href="https://doi.org/10.1093/ageing/afu124">https://doi.org/10.1093/ageing/afu124</a> .                                                               | Outcome: No relevant data reported                                                  |
| Shaughnessy, MK., Micielli, RL., DePestel, DD. <i>et al.</i> (2011) Evaluation of hospital room assignment and acquisition of <i>Clostridium difficile</i> infection. <i>Infect Control Hosp Epidemiol</i> 32(3):201–6. [PubMed: 21460503]                                                                                            | Intervention: No data on single room                                                |
| Shepley, MM., Harris, DD., White, R. (2008). Open-bay and single family room neonatal intensive care units – caregiver satisfaction and stress. <i>Environ Behav</i> 40(2):249–268.                                                                                                                                                   | Population: Impact on staff only                                                    |
| Singh, I., Edwards, C., Okeke, J. (2015). Impact of cognitive impairment on inpatient falls in single room setting and its adverse outcomes. <i>J Gerontol Geriatr Res</i> S4. S4eS001.                                                                                                                                               | Secondary publication of Singh 2015, no additional relevant data about single rooms |

| Citation                                                                                                                                                                                                                                         | Reason for exclusion                     |
|--------------------------------------------------------------------------------------------------------------------------------------------------------------------------------------------------------------------------------------------------|------------------------------------------|
| Ulrich, RS. (2006). Effects of single versus multi-bed accommodation and outcomes. Presented at the Symposium on Single-Bed Ward Accommodation, Cardiff, Wales.                                                                                  | METHOD                                   |
| van Oel, CJ., Mlihi, M., & Freeke, A. (2021). Design models for single patient rooms tested for patient preferences. <i>HERD</i> , 14(1), 31-46. <a href="https://doi.org/10.1177/1937586720937995">https://doi.org/10.1177/1937586720937995</a> | Outcome: No relevant data reported       |
| Williams, C., & Gardiner, C. (2015). Preference for a single or shared room in a UK inpatient hospice: Patient, family and staff perspectives. <i>BMJ Support Palliat Care</i> 5, 169–174. doi: 10.1136/bmjspcare-2013-000514                    | Population: hospice – not acute hospital |

For peer review only

1  
2

| Section/top<br>ic (page no)                                                                                                                                                                                                                                                                                                                       | Item | PRISMA checklist item                                                                                                                                                                                                                                                                                       | PRISMA<br>harms<br>(minimum)                                                                | Recommendations for reporting<br>harms in systematic reviews<br>(desirable)                                                                                                                                                            | Check<br>if done |
|---------------------------------------------------------------------------------------------------------------------------------------------------------------------------------------------------------------------------------------------------------------------------------------------------------------------------------------------------|------|-------------------------------------------------------------------------------------------------------------------------------------------------------------------------------------------------------------------------------------------------------------------------------------------------------------|---------------------------------------------------------------------------------------------|----------------------------------------------------------------------------------------------------------------------------------------------------------------------------------------------------------------------------------------|------------------|
| 3<br>4<br>5<br>6<br>7<br>8<br>9<br>10<br>11<br>12<br>13<br>14<br>15<br>16<br>17<br>18<br>19<br>20<br>21<br>22<br>23<br>24<br>25<br>26<br>27<br>28<br>29<br>30<br>31<br>32<br>33<br>34<br>35<br>36<br>37<br>38<br>39<br>40<br>41<br>42<br>43<br>44<br>45<br>46<br>47<br>48<br>49<br>50<br>51<br>52<br>53<br>54<br>55<br>56<br>57<br>58<br>59<br>60 |      |                                                                                                                                                                                                                                                                                                             |                                                                                             |                                                                                                                                                                                                                                        |                  |
| Title (3)                                                                                                                                                                                                                                                                                                                                         | 1    | Identify the report as a systematic review, meta-analysis, or both.                                                                                                                                                                                                                                         | Specifically mention “harms” or other related terms, or the harm of interest in the review. | —                                                                                                                                                                                                                                      | X                |
| Abstract<br>Structured<br>summary (4)                                                                                                                                                                                                                                                                                                             | 2    | Provide a structured summary including, as applicable: background; objectives; data sources; study eligibility criteria, participants, and interventions; study appraisal and synthesis methods; results; limitations; conclusions and implications of key findings; systematic review registration number. | —                                                                                           | Abstracts should report any analysis of harms undertaken in the review, if harms are a primary or secondary outcome.                                                                                                                   | X                |
| Introduction<br>Rationale (5)                                                                                                                                                                                                                                                                                                                     | 3    | Describe the rationale for the review in the context of what is already known.                                                                                                                                                                                                                              | —                                                                                           | It should clearly describe in introduction or in methods section which events are considered harms and provide a clear rationale for the specific harm(s), condition(s), and patient group(s) included in the review.                  | X                |
| Objectives (5)                                                                                                                                                                                                                                                                                                                                    | 4    | Provide an explicit statement of questions being addressed with reference to participants, interventions, comparisons, outcomes, and study design (PICOS).                                                                                                                                                  | —                                                                                           | PICOS format should be specified, although in systematic reviews of harms the selection criteria for P, C, and O may be very broad (same intervention may have been used for heterogeneous indications in a diverse range of patients) | X                |
| Methods<br>Protocol and<br>registration (6)                                                                                                                                                                                                                                                                                                       | 5    | Indicate if a review protocol exists, if and where it can be accessed (eg, web address), and, if available, provide registration information including registration number.                                                                                                                                 | —                                                                                           | No specific additional information is required for systematic reviews of harms.                                                                                                                                                        | X                |
| Eligibility<br>criteria (6)                                                                                                                                                                                                                                                                                                                       | 6    | Specify study characteristics (eg, PICOS, length of follow-up) and report characteristics (eg, years considered, language, publication status) used as criteria for eligibility, giving rationale.                                                                                                          | —                                                                                           | Report how handled relevant studies (based on population and intervention) when the outcomes of interest were not reported.<br>Report choices for specific study designs and length of follow-up.                                      | X                |
| Information<br>sources (7)                                                                                                                                                                                                                                                                                                                        | 7    | Describe all information sources (eg, databases with dates of coverage, contact with study authors to identify additional studies) in the search and date last searched.                                                                                                                                    | —                                                                                           | Report if only searched for published data, or also sought data from unpublished sources, from authors, drug manufacturers and regulatory agencies. If includes unpublished data, provide the source and the process of obtaining it.  | X                |
| Search (7)                                                                                                                                                                                                                                                                                                                                        | 8    | Present full electronic search strategy for at least one database, including any limits used, such that it could be repeated.                                                                                                                                                                               | —                                                                                           | If additional searches were used specifically to identify adverse events, authors should present the full search process so it can be replicated.                                                                                      | X                |



|    |                 |    |                                                                                                                                                                                                                        |                                                    |                                                                                                                                                                                                                                                                                                                                                                                                                                                                                                                                                                                     |   |
|----|-----------------|----|------------------------------------------------------------------------------------------------------------------------------------------------------------------------------------------------------------------------|----------------------------------------------------|-------------------------------------------------------------------------------------------------------------------------------------------------------------------------------------------------------------------------------------------------------------------------------------------------------------------------------------------------------------------------------------------------------------------------------------------------------------------------------------------------------------------------------------------------------------------------------------|---|
| 1  |                 |    |                                                                                                                                                                                                                        |                                                    |                                                                                                                                                                                                                                                                                                                                                                                                                                                                                                                                                                                     |   |
| 2  |                 |    |                                                                                                                                                                                                                        |                                                    |                                                                                                                                                                                                                                                                                                                                                                                                                                                                                                                                                                                     |   |
| 3  | Study           | 9  | State the process for selecting studies (ie, screening, eligibility, included in systematic review, and, if applicable, included in the meta-analysis).                                                                | —                                                  | If only included studies reporting on adverse events of interest, defined if screening was based on adverse event reporting in title/abstract or full text. If no harms reported in the text, report if any attempt was made to retrieve relevant data from authors.                                                                                                                                                                                                                                                                                                                | x |
| 4  | selection (8)   |    |                                                                                                                                                                                                                        |                                                    |                                                                                                                                                                                                                                                                                                                                                                                                                                                                                                                                                                                     |   |
| 5  |                 |    |                                                                                                                                                                                                                        |                                                    |                                                                                                                                                                                                                                                                                                                                                                                                                                                                                                                                                                                     |   |
| 6  |                 |    |                                                                                                                                                                                                                        |                                                    |                                                                                                                                                                                                                                                                                                                                                                                                                                                                                                                                                                                     |   |
| 7  |                 |    |                                                                                                                                                                                                                        |                                                    |                                                                                                                                                                                                                                                                                                                                                                                                                                                                                                                                                                                     |   |
| 8  |                 |    |                                                                                                                                                                                                                        |                                                    |                                                                                                                                                                                                                                                                                                                                                                                                                                                                                                                                                                                     |   |
| 9  |                 |    |                                                                                                                                                                                                                        |                                                    |                                                                                                                                                                                                                                                                                                                                                                                                                                                                                                                                                                                     |   |
| 10 | Data            | 10 | Describe method of data extraction from reports (eg, piloted forms, independently, in duplicate) and any processes for obtaining and confirming data from investigators.                                               | —                                                  | No specific additional information is required for systematic reviews of harms.                                                                                                                                                                                                                                                                                                                                                                                                                                                                                                     | x |
| 11 | collection      |    |                                                                                                                                                                                                                        |                                                    |                                                                                                                                                                                                                                                                                                                                                                                                                                                                                                                                                                                     |   |
| 12 | process (9)     |    |                                                                                                                                                                                                                        |                                                    |                                                                                                                                                                                                                                                                                                                                                                                                                                                                                                                                                                                     |   |
| 13 |                 |    |                                                                                                                                                                                                                        |                                                    |                                                                                                                                                                                                                                                                                                                                                                                                                                                                                                                                                                                     |   |
| 14 |                 |    |                                                                                                                                                                                                                        |                                                    |                                                                                                                                                                                                                                                                                                                                                                                                                                                                                                                                                                                     |   |
| 15 | Data items (9)  | 11 | List and define all variables for which data were sought (eg, PICOS, funding sources) and any assumptions and simplifications made.                                                                                    | —                                                  | Report the definition of the harm and seriousness used by each included study (if applicable). Report if multiple events occurred in the same individuals, if this information is available. Consider if the harm may be related to factors associated with participants (eg, age, sex, use of medications) or provider (eg, years of practice, level of training). Specify if information was extracted and how it was used in subsequent results. Specify if extracted details regarding the specific methods used to capture harms (active/passive and timing of adverse event). | x |
| 16 |                 |    |                                                                                                                                                                                                                        |                                                    |                                                                                                                                                                                                                                                                                                                                                                                                                                                                                                                                                                                     |   |
| 17 |                 |    |                                                                                                                                                                                                                        |                                                    |                                                                                                                                                                                                                                                                                                                                                                                                                                                                                                                                                                                     |   |
| 18 |                 |    |                                                                                                                                                                                                                        |                                                    |                                                                                                                                                                                                                                                                                                                                                                                                                                                                                                                                                                                     |   |
| 19 |                 |    |                                                                                                                                                                                                                        |                                                    |                                                                                                                                                                                                                                                                                                                                                                                                                                                                                                                                                                                     |   |
| 20 |                 |    |                                                                                                                                                                                                                        |                                                    |                                                                                                                                                                                                                                                                                                                                                                                                                                                                                                                                                                                     |   |
| 21 |                 |    |                                                                                                                                                                                                                        |                                                    |                                                                                                                                                                                                                                                                                                                                                                                                                                                                                                                                                                                     |   |
| 22 |                 |    |                                                                                                                                                                                                                        |                                                    |                                                                                                                                                                                                                                                                                                                                                                                                                                                                                                                                                                                     |   |
| 23 |                 |    |                                                                                                                                                                                                                        |                                                    |                                                                                                                                                                                                                                                                                                                                                                                                                                                                                                                                                                                     |   |
| 24 |                 |    |                                                                                                                                                                                                                        |                                                    |                                                                                                                                                                                                                                                                                                                                                                                                                                                                                                                                                                                     |   |
| 25 |                 |    |                                                                                                                                                                                                                        |                                                    |                                                                                                                                                                                                                                                                                                                                                                                                                                                                                                                                                                                     |   |
| 26 |                 |    |                                                                                                                                                                                                                        |                                                    |                                                                                                                                                                                                                                                                                                                                                                                                                                                                                                                                                                                     |   |
| 27 |                 |    |                                                                                                                                                                                                                        |                                                    |                                                                                                                                                                                                                                                                                                                                                                                                                                                                                                                                                                                     |   |
| 28 |                 |    |                                                                                                                                                                                                                        |                                                    |                                                                                                                                                                                                                                                                                                                                                                                                                                                                                                                                                                                     |   |
| 29 | Risk of bias in | 12 | Describe methods used for assessing risk of bias of individual studies (including specification of whether this was done at the study or outcome level), and how this information is to be used in any data synthesis. | —                                                  | The risk of bias assessment should be considered separately for outcomes of benefit and harms.                                                                                                                                                                                                                                                                                                                                                                                                                                                                                      | x |
| 30 | individual      |    |                                                                                                                                                                                                                        |                                                    |                                                                                                                                                                                                                                                                                                                                                                                                                                                                                                                                                                                     |   |
| 31 | studies (10)    |    |                                                                                                                                                                                                                        |                                                    |                                                                                                                                                                                                                                                                                                                                                                                                                                                                                                                                                                                     |   |
| 32 |                 |    |                                                                                                                                                                                                                        |                                                    |                                                                                                                                                                                                                                                                                                                                                                                                                                                                                                                                                                                     |   |
| 33 |                 |    |                                                                                                                                                                                                                        |                                                    |                                                                                                                                                                                                                                                                                                                                                                                                                                                                                                                                                                                     |   |
| 34 |                 |    |                                                                                                                                                                                                                        |                                                    |                                                                                                                                                                                                                                                                                                                                                                                                                                                                                                                                                                                     |   |
| 35 | Summary         | 13 | State the principal summary measures (eg, risk ratio, difference in means).                                                                                                                                            | —                                                  | No specific additional information is required for systematic reviews of harms.                                                                                                                                                                                                                                                                                                                                                                                                                                                                                                     | x |
| 36 | measures (11)   |    |                                                                                                                                                                                                                        |                                                    |                                                                                                                                                                                                                                                                                                                                                                                                                                                                                                                                                                                     |   |
| 37 |                 |    |                                                                                                                                                                                                                        |                                                    |                                                                                                                                                                                                                                                                                                                                                                                                                                                                                                                                                                                     |   |
| 38 | Synthesis of    | 14 | Describe the methods of handling data and combining results of studies, if done, including measures of consistency (eg, $I^2$ ) for each meta-analysis.                                                                | Specify how zero events were handled, if relevant. |                                                                                                                                                                                                                                                                                                                                                                                                                                                                                                                                                                                     |   |
| 39 | results (11)    |    |                                                                                                                                                                                                                        |                                                    |                                                                                                                                                                                                                                                                                                                                                                                                                                                                                                                                                                                     |   |
| 40 |                 |    |                                                                                                                                                                                                                        |                                                    |                                                                                                                                                                                                                                                                                                                                                                                                                                                                                                                                                                                     |   |
| 41 | Risk of bias    | 15 | Specify any assessment of risk of bias that may affect the cumulative evidence (eg, publication bias, selective reporting within studies).                                                                             | —                                                  | Present the extent of missing information (studies without harms outcomes), any factors that may account for their absence, and whether these reasons may be related to the results.                                                                                                                                                                                                                                                                                                                                                                                                | x |
| 42 | across studies  |    |                                                                                                                                                                                                                        |                                                    |                                                                                                                                                                                                                                                                                                                                                                                                                                                                                                                                                                                     |   |
| 43 | (1)             |    |                                                                                                                                                                                                                        |                                                    |                                                                                                                                                                                                                                                                                                                                                                                                                                                                                                                                                                                     |   |
| 44 |                 |    |                                                                                                                                                                                                                        |                                                    |                                                                                                                                                                                                                                                                                                                                                                                                                                                                                                                                                                                     |   |
| 45 |                 |    |                                                                                                                                                                                                                        |                                                    |                                                                                                                                                                                                                                                                                                                                                                                                                                                                                                                                                                                     |   |
| 46 | Additional      | 16 | Describe methods of additional analyses (eg, sensitivity or subgroup analyses, meta-regression), if done, indicating which were prespecified.                                                                          | —                                                  | Sensitivity analyses may be affected by different definitions, grading, and attribution of adverse events, as adverse events are typically infrequent or reported using heterogeneous classifications. Report the number of participants and studies included in each subgroup.                                                                                                                                                                                                                                                                                                     |   |
| 47 | analyses (12)   |    |                                                                                                                                                                                                                        |                                                    |                                                                                                                                                                                                                                                                                                                                                                                                                                                                                                                                                                                     |   |
| 48 |                 |    |                                                                                                                                                                                                                        |                                                    |                                                                                                                                                                                                                                                                                                                                                                                                                                                                                                                                                                                     |   |
| 49 |                 |    |                                                                                                                                                                                                                        |                                                    |                                                                                                                                                                                                                                                                                                                                                                                                                                                                                                                                                                                     |   |
| 50 |                 |    |                                                                                                                                                                                                                        |                                                    |                                                                                                                                                                                                                                                                                                                                                                                                                                                                                                                                                                                     |   |
| 51 |                 |    |                                                                                                                                                                                                                        |                                                    |                                                                                                                                                                                                                                                                                                                                                                                                                                                                                                                                                                                     |   |
| 52 | <b>Results</b>  |    |                                                                                                                                                                                                                        |                                                    |                                                                                                                                                                                                                                                                                                                                                                                                                                                                                                                                                                                     |   |
| 53 | Study           | 17 | Give numbers of studies screened, assessed for eligibility, and included in the                                                                                                                                        | —                                                  | If a review addresses both efficacy and harms, display a flow diagram specific for each (efficacy and harm).                                                                                                                                                                                                                                                                                                                                                                                                                                                                        | x |
| 54 | selection (13)  |    |                                                                                                                                                                                                                        |                                                    |                                                                                                                                                                                                                                                                                                                                                                                                                                                                                                                                                                                     |   |
| 55 |                 |    |                                                                                                                                                                                                                        |                                                    |                                                                                                                                                                                                                                                                                                                                                                                                                                                                                                                                                                                     |   |
| 56 |                 |    |                                                                                                                                                                                                                        |                                                    |                                                                                                                                                                                                                                                                                                                                                                                                                                                                                                                                                                                     |   |
| 57 |                 |    |                                                                                                                                                                                                                        |                                                    |                                                                                                                                                                                                                                                                                                                                                                                                                                                                                                                                                                                     |   |
| 58 |                 |    |                                                                                                                                                                                                                        |                                                    |                                                                                                                                                                                                                                                                                                                                                                                                                                                                                                                                                                                     |   |
| 59 |                 |    |                                                                                                                                                                                                                        |                                                    |                                                                                                                                                                                                                                                                                                                                                                                                                                                                                                                                                                                     |   |
| 60 |                 |    |                                                                                                                                                                                                                        |                                                    |                                                                                                                                                                                                                                                                                                                                                                                                                                                                                                                                                                                     |   |

|    |                   |                                             |                                               |                     |                                                |
|----|-------------------|---------------------------------------------|-----------------------------------------------|---------------------|------------------------------------------------|
| 1  |                   |                                             |                                               |                     |                                                |
| 2  |                   |                                             |                                               |                     |                                                |
| 3  |                   | review, with reasons for exclusions at each |                                               |                     |                                                |
| 4  |                   | stage, ideally with a flow diagram.         |                                               |                     |                                                |
| 5  |                   |                                             |                                               |                     |                                                |
| 6  | Study             | 18                                          | For each study, present characteristics for   | Define each harm    | Add additional characteristics to: "P"         |
| 7  | characteristics   |                                             | which data were extracted (eg, study size,    | addressed, how it   | (population) patient risk factors that were    |
| 8  | (14)              |                                             | PICOS, follow-up period) and provide the      | was ascertained     | considered as possibly affecting the risk of   |
| 9  |                   |                                             | citations.                                    | (eg, patient        | the harm outcome. "I" (intervention)           |
| 10 |                   |                                             |                                               | report, active      | professional expertise/skills if relevant (for |
| 11 |                   |                                             |                                               | search), and over   | example if the intervention is a procedure).   |
| 12 |                   |                                             |                                               | what time period.   | "T" (time) timing of all harms assessments     |
| 13 | Risk of bias      | 19                                          | Present data on risk of bias of each study    | —                   | and the length of follow-up.                   |
| 14 | within studies    |                                             | and, if available, any outcome level          |                     | Consider the possible sources of biases that   |
| 15 | (15)              |                                             | assessment (see item 12).                     |                     | could affect the specific harm under           |
| 16 |                   |                                             |                                               |                     | consideration within the review. Sample        |
| 17 |                   |                                             |                                               |                     | selection, dropouts and measurement of         |
| 18 |                   |                                             |                                               |                     | adverse events should be evaluated             |
| 19 |                   |                                             |                                               |                     | separately from the outcomes of benefit as     |
| 20 | Results of        | 20                                          | For all outcomes considered (benefits or      | —                   | described in item 12, above.                   |
| 21 | individual        |                                             | harms), present, for each study: (a) simple   |                     | Report the actual numbers of adverse           |
| 22 | studies (16)      |                                             | summary data for each intervention group      |                     | events in each study, separately for each      |
| 23 |                   |                                             | (b) effect estimates and confidence           |                     | intervention.                                  |
| 24 |                   |                                             | intervals, ideally with a forest plot.        |                     |                                                |
| 25 | Synthesis of      | 21                                          | Present results of each meta-analysis done,   | Describe any        | If included data from unpublished sources,     |
| 26 | results (17)      |                                             | including confidence intervals and            | assessment of       | report clearly the data source and the         |
| 27 |                   |                                             | measures of consistency.                      | possible causality. | impact of these studies to the final           |
| 28 |                   |                                             |                                               |                     | systematic review.                             |
| 29 | Risk of bias      | 22                                          | Present results of any assessment of risk of  | —                   | No specific additional information is          |
| 30 | across studies    |                                             | bias across studies (see item 15).            |                     | required for systematic reviews of harms.      |
| 31 | (18)              |                                             |                                               |                     | See item 15 above.                             |
| 32 | Additional        | 23                                          | Give results of additional analyses, if done  | —                   | No specific additional information is          |
| 33 | analysis (18)     |                                             | (eg, sensitivity or subgroup analyses,        |                     | required for systematic reviews of harms.      |
| 34 |                   |                                             | meta-regression (see item 16)).               |                     |                                                |
| 35 | <b>Discussion</b> |                                             |                                               |                     |                                                |
| 36 | Summary of        | 24                                          | Summarise the main findings including         | —                   | No specific additional information is          |
| 37 | evidence (18)     |                                             | the strength of evidence for each main        |                     | required for systematic reviews of harms.      |
| 38 |                   |                                             | outcome; consider their relevance to key      |                     |                                                |
| 39 |                   |                                             | groups (eg, healthcare providers, users,      |                     |                                                |
| 40 | limitations       | 25                                          | Discuss limitations at study and outcome      | —                   | Recognise possible limitations of meta-        |
| 41 | (18)              |                                             | level (eg, risk of bias), and at review level |                     | analysis for rare adverse events (ie, quality  |
| 42 |                   |                                             | (eg, incomplete retrieval of identified       |                     | and quantity of data), issues noted            |
| 43 |                   |                                             | research, reporting bias).                    |                     | previously related to collection and           |
| 44 |                   |                                             |                                               |                     | reporting.                                     |
| 45 | Conclusions       | 26                                          | Provide a general interpretation of the       | —                   | State conclusions in coherence with the        |
| 46 | (19)              |                                             | results in the context of other evidence,     |                     | review findings. When adverse events           |
| 47 |                   |                                             | and implications for future research.         |                     | were not identified we caution against the     |
| 48 |                   |                                             |                                               |                     | conclusion that the intervention is "safe,"    |
| 49 |                   |                                             |                                               |                     | when, in reality, its safety remains           |
| 50 |                   |                                             |                                               |                     | unknown.                                       |
| 51 | <b>Funding</b>    |                                             |                                               |                     |                                                |
| 52 | Funding (19)      | 27                                          | Describe sources of funding for the           | —                   | No specific additional information is          |
| 53 |                   |                                             | systematic review and other support (eg,      |                     | required for systematic reviews of harms.      |
| 54 |                   |                                             | supply of data); role of funders for the      |                     |                                                |
| 55 |                   |                                             | systematic review.                            |                     |                                                |
| 56 |                   |                                             |                                               |                     |                                                |
| 57 |                   |                                             |                                               |                     |                                                |
| 58 |                   |                                             |                                               |                     |                                                |
| 59 |                   |                                             |                                               |                     |                                                |
| 60 |                   |                                             |                                               |                     |                                                |

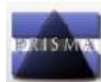

## PRISMA 2020 Checklist

| Section and Topic             | Item # | Checklist item                                                                                                                                                                                                                                                                                       | Location where item is reported |
|-------------------------------|--------|------------------------------------------------------------------------------------------------------------------------------------------------------------------------------------------------------------------------------------------------------------------------------------------------------|---------------------------------|
| <b>TITLE</b>                  |        |                                                                                                                                                                                                                                                                                                      |                                 |
| Title                         | 1      | Identify the report as a systematic review.                                                                                                                                                                                                                                                          | Title page                      |
| <b>ABSTRACT</b>               |        |                                                                                                                                                                                                                                                                                                      |                                 |
| Abstract                      | 2      | See the PRISMA 2020 for Abstracts checklist.                                                                                                                                                                                                                                                         | Abstract page                   |
| <b>INTRODUCTION</b>           |        |                                                                                                                                                                                                                                                                                                      |                                 |
| Rationale                     | 3      | Describe the rationale for the review in the context of existing knowledge.                                                                                                                                                                                                                          | p.4                             |
| Objectives                    | 4      | Provide an explicit statement of the objective(s) or question(s) the review addresses.                                                                                                                                                                                                               | p.4                             |
| <b>METHODS</b>                |        |                                                                                                                                                                                                                                                                                                      |                                 |
| Eligibility criteria          | 5      | Specify the inclusion and exclusion criteria for the review and how studies were grouped for the syntheses.                                                                                                                                                                                          | p.4                             |
| Information sources           | 6      | Specify all databases, registers, websites, organisations, reference lists and other sources searched or consulted to identify studies. Specify the date when each source was last searched or consulted.                                                                                            | p.4 and suppl mat.              |
| Search strategy               | 7      | Present the full search strategies for all databases, registers and websites, including any filters and limits used.                                                                                                                                                                                 | p.4 and appendix 1              |
| Selection process             | 8      | Specify the methods used to decide whether a study met the inclusion criteria of the review, including how many reviewers screened each record and each report retrieved, whether they worked independently, and if applicable, details of automation tools used in the process.                     | p.5 and appendix 2              |
| Data collection process       | 9      | Specify the methods used to collect data from reports, including how many reviewers collected data from each report, whether they worked independently, any processes for obtaining or confirming data from study investigators, and if applicable, details of automation tools used in the process. | p.5                             |
| Data items                    | 10a    | List and define all outcomes for which data were sought. Specify whether all results that were compatible with each outcome domain in each study were sought (e.g. for all measures, time points, analyses), and if not, the methods used to decide which results to collect.                        | p.5                             |
|                               | 10b    | List and define all other variables for which data were sought (e.g. participant and intervention characteristics, funding sources). Describe any assumptions made about any missing or unclear information.                                                                                         | p.5                             |
| Study risk of bias assessment | 11     | Specify the methods used to assess risk of bias in the included studies, including details of the tool(s) used, how many reviewers assessed each study and whether they worked independently, and if applicable, details of automation tools used in the process.                                    | p.5                             |
| Effect measures               | 12     | Specify for each outcome the effect measure(s) (e.g. risk ratio, mean difference) used in the synthesis or presentation of results.                                                                                                                                                                  | p.5                             |
| Synthesis methods             | 13a    | Describe the processes used to decide which studies were eligible for each synthesis (e.g. tabulating the study intervention characteristics and comparing against the planned groups for each synthesis (item #5)).                                                                                 | p.5                             |
|                               | 13b    | Describe any methods required to prepare the data for presentation or synthesis, such as handling of missing summary statistics, or data conversions.                                                                                                                                                | p.5                             |
|                               | 13c    | Describe any methods used to tabulate or visually display results of individual studies and syntheses.                                                                                                                                                                                               | p.5                             |
|                               | 13d    | Describe any methods used to synthesize results and provide a rationale for the choice(s). If meta-analysis was performed, describe the model(s), method(s) to identify the presence and extent of statistical heterogeneity, and software package(s) used.                                          | p.5                             |
|                               | 13e    | Describe any methods used to explore possible causes of heterogeneity among study results (e.g. subgroup analysis, meta-regression).                                                                                                                                                                 | p.5                             |
|                               | 13f    | Describe any sensitivity analyses conducted to assess robustness of the synthesized results.                                                                                                                                                                                                         | N/A                             |
| Reporting bias assessment     | 14     | Describe any methods used to assess risk of bias due to missing results in a synthesis (arising from reporting biases).                                                                                                                                                                              | p.5                             |

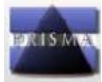

## PRISMA 2020 Checklist

| Section and Topic             | Item # | Checklist item                                                                                                                                                                                                                                                                       | Location where item is reported |
|-------------------------------|--------|--------------------------------------------------------------------------------------------------------------------------------------------------------------------------------------------------------------------------------------------------------------------------------------|---------------------------------|
| Certainty assessment          | 15     | Describe any methods used to assess certainty (or confidence) in the body of evidence for an outcome.                                                                                                                                                                                | p.5                             |
| <b>RESULTS</b>                |        |                                                                                                                                                                                                                                                                                      |                                 |
| Study selection               | 16a    | Describe the results of the search and selection process, from the number of records identified in the search to the number of studies included in the review, ideally using a flow diagram.                                                                                         | p.6 and fig.1                   |
|                               | 16b    | Cite studies that might appear to meet the inclusion criteria, but which were excluded, and explain why they were excluded.                                                                                                                                                          | Fig.1 and appendix              |
| Study characteristics         | 17     | Cite each included study and present its characteristics.                                                                                                                                                                                                                            | p.6, fig.1, suppl tables        |
| Risk of bias in studies       | 18     | Present assessments of risk of bias for each included study.                                                                                                                                                                                                                         | Suppl. tab.1                    |
| Results of individual studies | 19     | For all outcomes, present, for each study: (a) summary statistics for each group (where appropriate) and (b) an effect estimate and its precision (e.g. confidence/credible interval), ideally using structured tables or plots.                                                     | Suppl. Tab 2-17                 |
| Results of syntheses          | 20a    | For each synthesis, briefly summarise the characteristics and risk of bias among contributing studies.                                                                                                                                                                               | N/A                             |
|                               | 20b    | Present results of all statistical syntheses conducted. If meta-analysis was done, present for each the summary estimate and its precision (e.g. confidence/credible interval) and measures of statistical heterogeneity. If comparing groups, describe the direction of the effect. | N/A                             |
|                               | 20c    | Present results of all investigations of possible causes of heterogeneity among study results.                                                                                                                                                                                       | N/A                             |
|                               | 20d    | Present results of all sensitivity analyses conducted to assess the robustness of the synthesized results.                                                                                                                                                                           | N/A                             |
| Reporting biases              | 21     | Present assessments of risk of bias due to missing results (arising from reporting biases) for each synthesis assessed.                                                                                                                                                              | N/A                             |
| Certainty of evidence         | 22     | Present assessments of certainty (or confidence) in the body of evidence for each outcome assessed.                                                                                                                                                                                  | Suppl. Tab 2-17                 |
| <b>DISCUSSION</b>             |        |                                                                                                                                                                                                                                                                                      |                                 |
| Discussion                    | 23a    | Provide a general interpretation of the results in the context of other evidence.                                                                                                                                                                                                    | p.17                            |
|                               | 23b    | Discuss any limitations of the evidence included in the review.                                                                                                                                                                                                                      | p.18                            |
|                               | 23c    | Discuss any limitations of the review processes used.                                                                                                                                                                                                                                | p.18                            |
|                               | 23d    | Discuss implications of the results for practice, policy, and future research.                                                                                                                                                                                                       | p.18                            |
| <b>OTHER INFORMATION</b>      |        |                                                                                                                                                                                                                                                                                      |                                 |
| Registration and protocol     | 24a    | Provide registration information for the review, including register name and registration number, or state that the review was not registered.                                                                                                                                       | p.19 - registration             |
|                               | 24b    | Indicate where the review protocol can be accessed, or state that a protocol was not prepared.                                                                                                                                                                                       | p.19                            |
|                               | 24c    | Describe and explain any amendments to information provided at registration or in the protocol.                                                                                                                                                                                      | n/a                             |
| Support                       | 25     | Describe sources of financial or non-financial support for the review, and the role of the funders or sponsors in the review.                                                                                                                                                        | p.19 - funding                  |
| Competing interests           | 26     | Declare any competing interests of review authors.                                                                                                                                                                                                                                   | p.19 competing interests        |

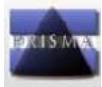

## PRISMA 2020 Checklist

| Section and Topic                              | Item # | Checklist item                                                                                                                                                                                                                             | Location where item is reported |
|------------------------------------------------|--------|--------------------------------------------------------------------------------------------------------------------------------------------------------------------------------------------------------------------------------------------|---------------------------------|
| Availability of data, code and other materials | 27     | Report which of the following are publicly available and where they can be found: template data collection forms; data extracted from included studies; data used for all analyses; analytic code; any other materials used in the review. | p.19                            |

From: Page MJ, McKenzie JE, Bossuyt PM, Boutron I, Hoffmann TC, Mulrow CD, et al. The PRISMA 2020 statement: an updated guideline for reporting systematic reviews. *BMJ* 2021;372:n71. doi: 10.1136/bmj.n71

For more information, visit: <http://www.prisma-statement.org/>

For peer review only
